# Supplementary material
Source: PubMed Central journal article supplement (PMC3243545)
Supplement: supp_M111.234559_Figure_S13.pdf [file supp_M111.234559_Figure_S13.pdf]

RFP-p53-Ub

MHHHHHASS EDVIKEFMRF KVRMEGSVNG HEFEIEGEGE GRPYEGTQTA KLKVTKGGPL  
PFAWDILSPQ FQYGSKAYVK<sup>80(RFP\_78)</sup> HPADIPDYLK LSFPEGFKWE RVMNFEDGGV VTVTQDSSLQ  
DGEFIYKVKL RGTNFPDGP VMQKKTGWE ASTERMYPED GALK<sup>164(RFP\_158)</sup>GEIKMR LKLK<sup>174(RFP\_168)</sup>DGGHYD  
AEVKTTYMAK K<sup>191(RFP\_185)</sup>PVQLPGAYK<sup>200(RFP\_194)</sup> TDIKLDITSH NEDYTIVEQY ERAEGRHSTG AENLYFQGLE  
EEPQSDPSVE PPLSQETFSD LWKLLPENNV LSPLPSQAMD DLMLSPDDIE QWFTEDPGPD  
EAPRMPEAAP RVAPAPAAPT PAAPAPAPSW PLSSSVPSQK<sup>340(p53\_101)</sup> TYQGSYGFR L GFLHSGTAK<sup>359(p53\_120)</sup>S  
VTCTYSPALN KMFCQLAKTC PVQLWVDSTP PPGTRVRAMA IYKQSQHMTE VVRRCPHHER  
CSDSDGLAPP QHLIRVEGNL RVEYLDDRNT FRHSVVVPYE PPEVGS DCTT IHNYMCNSS  
CMGGMNRRPI LTIITLEDSS GNLLGRNSFE VHVCACPGRD RRTEENLRK KGEPHHELPP  
GSTKRALSNN TSSSPQPK<sup>558(p53\_319)</sup>K<sup>559(p53\_320)</sup>K<sup>560(p53\_321)</sup> PLDGEYFTLQ IRGRERFEMF RELNEALELK<sup>590(p53\_351)</sup> DAQAGKEPGG  
SRAHSSHLKS KKGQSTSRHK KLMFKTEGPD SDQIFVKTLT GK<sup>11</sup>TITLEVEP SDTIENVK<sup>27</sup>A  
KIQDKEGIPP DQORLIFAGK<sup>48</sup> QLEDGRTLSDY NIQK<sup>63</sup>ESTLHL VLRLRGG

N tag/linker sequence

N RFP

N p53

N Ubiquitin

RFP-BARD-BRCA-Ub

MHHHHHHASS EDVIKEFMRF KVRMEGSVNG HEFEIEGEGE GRPYEGTQTA KLKVTKGGPL  
PFAWDILSPQ FQYGSKAYVK HPADIPDYLK LSFPEGFKWE RVMNFEDGGV VTVTQDSSLQ  
DGEFIYKVKL RGTNFPDGP VMQKKTMGWE ASTERMYPED GALKGEIKMR LKLK<sup>174(RFP\_168)</sup>DGGHYD  
AEVKTTYMAK K<sup>191(RFP\_185)</sup>PVQLPGAYK<sup>200(RFP\_194)</sup>TDIKLDITSH NEDYTIVEQY ERAEGRHSTG AENLYFQGLE  
EPDGRGAWAH SRAALDRLEK<sup>260(BARD\_46)</sup>LLRCSRCTNI LREPVCLGGC EHIFCSNCVS DCIGTGCPVC  
YTPAWIQDLK INRQLDSMIQ LCSKLRNLLH DNELSDLK<sup>338(BARD\_124)</sup>ED GGSGGDL SAL RVEEVQNVIN  
AMQKILECPI CLELIKEPVS TKCDHIFCKF CMLK<sup>394(BRCA\_50)</sup>LLNQKK<sup>400(BRCA\_56)</sup>GPSQCPLCK<sup>409(BRCA\_65)</sup>N DITKRSLQES  
TRFSQOLVEEL LKIICAFQLD TGLEYANSYN FAKQIFVKTL TGK<sup>11</sup>TITLEVE PSDTIENVK<sup>27</sup>A  
KIQDKEGIPP DQQRILIFAGK<sup>48</sup>QLEDGRTLSD YNIQK<sup>63</sup>ESTLH LVLRLRGG

N tag/linker sequence

N RFP

N BARD

N BRCA

N Ubiquitin
