# Supplementary material
Source: PubMed Central journal article supplement (PMC3243545)
Supplement: supp_M111.234559_FigureS6.pdf [file supp_M111.234559_FigureS6.pdf]

| Sample | Substrate        | E2     |
|--------|------------------|--------|
| 1      | RFP-BARD-BRCA-Ub | 5C     |
| 2      | RFP-BARD-BRCA-Ub | D3     |
| 3      | RFP-BARD-BRCA-Ub | E1     |
| 4      | RFP-BARD-BRCA-Ub | E2     |
| 5      | RFP-BARD-BRCA-Ub | E3     |
| 6      | RFP-BARD-BRCA-Ub | N+V1   |
| 7      | RFP-BARD-BRCA-Ub | N+V2   |
| 8      | RFP-BARD-BRCA-Ub | W      |
| 9      | RFP-BARD-BRCA-Ub | 25K    |
| 10     | RFP-BARD-BRCA-Ub | W+25K  |
| 11     | RFP-BARD-BRCA-Ub | W+N+V1 |
| 12     | RFP-BARD-BRCA-Ub | - E2   |
| 13     | RFP-BARD-BRCA    | 5C     |
| 14     | RFP-BARD-BRCA    | D3     |
| 15     | RFP-BARD-BRCA    | E1     |
| 16     | RFP-BARD-BRCA    | E2     |
| 17     | RFP-BARD-BRCA    | E3     |
| 18     | RFP-BARD-BRCA    | N+V1   |
| 19     | RFP-BARD-BRCA    | N+V2   |
| 20     | RFP-BARD-BRCA    | W      |
| 21     | RFP-BARD-BRCA    | 25K    |
| 22     | RFP-BARD-BRCA    | W+25K  |
| 23     | RFP-BARD-BRCA    | W+N+V1 |
| 24     | RFP-BARD-BRCA    | - E2   |

(MATRIX) SCIENCE Mascot Search Results

Protein View

Match to: YD\_RFP-BARD-BCRA-Ub Score: 4904

YD\_RFP-BARD-BCRA-Ub

Found in search of C:\YaelDavid\100203\_YaelDavid\BIT00808\_YD\_2\_merge.mgf

Nominal mass (M<sub>r</sub>): 60628; Calculated pI value: 6.10

NCBI BLAST search of YD\_RFP-BARD-BCRA-Ub against nr

Unformatted sequence string for pasting into other applications

Fixed modifications: Carbamidomethyl (C)

Variable modifications: GlyGly (K), Oxidation (M)

Cleavage by Trypsin: cuts C-term side of KR unless next residue is P

Sequence Coverage: 61%

Matched peptides shown in Bold Red

1 MHHHHHHASS EDVKEFMRF KVRMEGSVNG HEFEIEGEGE GRPYEGTQTA
51 KIKVTKGGPL PFAMWLLSPO FQYGSKAYVK HPADIPDYLK LSFPEGFKWE
101 RVNMFEDGGV VVTQDSSLQ DGEFIYKVKL RGTNFPDGP VMQRKTMGWE
151 ASTERMFPEP GALKGEIKMR LKLDKGGHYD AENVKTYMAK KPVQLPGAYK
201 TDIKLDTFSH NEDTIVIEQY ERAEGRHSYGC AENLIPQGLE EPDGRGAWAH
251 SRALLDRLEK LLRCSGLGK LREPVCLGCI EHLFCSNOVS DCIQTGCPVC
301 VTPAWIQDLK INRQLDSMIQ LCSKLRNLLH DNELSDIKED GSGGCDLSAL
351 RVEEYQNVIN AMQKILCEPI CLEELKEPVS TKCDHIFCKF CMLKLLNQKK
401 GFSQCPCKNK DITKRSIQES TRFSQALVEK LKILCARQLD TGLEYSANYN
451 FAKQIFVKTL TGTITLIEVE PSTTIENVA KIQDKREGIPP DQQRILFAGK
501 QLEDGRSLD YNIQKRESLH LVLRLRGG

Show predicted peptides also

Sort Peptides By Residue Number Increasing Mass Decreasing Mass

Table with columns: Start, End, Observed, Mr (expt), Mr (calc), Delta, Miss, Sequence. Contains a list of peptides with their observed and calculated masses, delta values, and search scores.



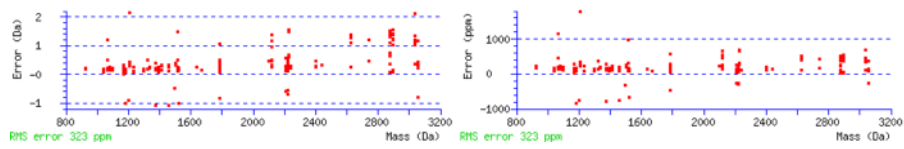

Mascot: <http://www.matrixscience.com/>

**(MATRIX SCIENCE) Mascot Search Results**

**Peptide View**

MS/MS Fragmentation of **TLTGKTITLEVEPSDTIENVK**  
 Found in **YD\_RFP-BARD-BRCA-Ub**, YD\_RFP-BARD-BRCA-Ub

Match to Query 793: 2401.721172 from(801.581000,3+) intensity(3478311.0000)  
 Title: Cmpd 116, +MSn(802.15), 27.2 min  
 Data file C:\YaelDavid\100203\_YaelDavid\BIT00808\_YD\_2\_merge.mgf

Click mouse within plot area to zoom in by factor of two about that point  
 Or, Plot from 300 to 1500 Da Full range  
 Label all possible matches  Label matches used for scoring

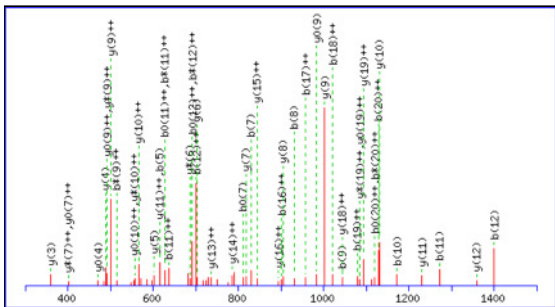

Monoisotopic mass of neutral peptide Mr(calc): 2401.2588  
 Fixed modifications: Carbamidomethyl (C) (apply to specified residues or termini only)  
 Variable modifications:  
 K5 : GlyGly (K)  
 Ions Score: 104 Expect: 2.4e-07  
 Matches : 52/226 fragment ions using 54 most intense peaks ([help](#))

| #  | b         | b <sup>++</sup> | b <sup>*</sup> | b <sup>s++</sup> | b <sup>0</sup> | b <sup>0++</sup> | Seq. | y         | y <sup>++</sup> | y <sup>*</sup> | y <sup>s++</sup> | y <sup>0</sup> | y <sup>0++</sup> | #  |
|----|-----------|-----------------|----------------|------------------|----------------|------------------|------|-----------|-----------------|----------------|------------------|----------------|------------------|----|
| 1  | 102.0550  | 51.5311         |                |                  | 84.0444        | 42.5258          | T    |           |                 |                |                  |                |                  | 21 |
| 2  | 215.1390  | 108.0731        |                |                  | 197.1285       | 99.0679          | L    | 2301.2184 | 1151.1128       | 2284.1918      | 1142.5996        | 2283.2078      | 1142.1076        | 20 |
| 3  | 316.1867  | 158.5970        |                |                  | 298.1761       | 149.5917         | T    | 2188.1343 | 1094.5708       | 2171.1078      | 1086.0575        | 2170.1238      | 1085.5655        | 19 |
| 4  | 373.2082  | 187.1077        |                |                  | 355.1976       | 178.1024         | G    | 2087.0867 | 1044.0470       | 2070.0601      | 1035.5337        | 2069.0761      | 1035.0417        | 18 |
| 5  | 615.3461  | 308.1767        | 598.3195       | 299.6634         | 597.3355       | 299.1714         | K    | 2030.0652 | 1015.5362       | 2013.0386      | 1007.0230        | 2012.0546      | 1006.5310        | 17 |
| 6  | 716.3937  | 358.7005        | 699.3672       | 350.1872         | 698.3832       | 349.6952         | T    | 1787.9273 | 894.4673        | 1770.9008      | 885.9540         | 1769.9167      | 885.4620         | 16 |
| 7  | 829.4778  | 415.2425        | 812.4512       | 406.7293         | 811.4672       | 406.2373         | I    | 1686.8796 | 843.9434        | 1669.8531      | 835.4302         | 1668.8691      | 834.9382         | 15 |
| 8  | 930.5255  | 465.7664        | 913.4989       | 457.2531         | 912.5149       | 456.7611         | T    | 1573.7956 | 787.4014        | 1556.7690      | 778.8881         | 1555.7850      | 778.3961         | 14 |
| 9  | 1043.6095 | 522.3084        | 1026.5830      | 513.7951         | 1025.5990      | 513.3031         | L    | 1472.7479 | 736.8776        | 1455.7213      | 728.3643         | 1454.7373      | 727.8723         | 13 |
| 10 | 1172.6521 | 586.8297        | 1155.6256      | 578.3164         | 1154.6416      | 577.8244         | E    | 1359.6638 | 680.3355        | 1342.6373      | 671.8223         | 1341.6533      | 671.3303         | 12 |
| 11 | 1271.7205 | 636.3639        | 1254.6940      | 627.8506         | 1253.7100      | 627.3586         | V    | 1230.6212 | 615.8142        | 1213.5947      | 607.3010         | 1212.6107      | 606.8090         | 11 |
| 12 | 1400.7631 | 700.8852        | 1383.7366      | 692.3719         | 1382.7526      | 691.8799         | E    | 1131.5528 | 566.2800        | 1114.5263      | 557.7668         | 1113.5422      | 557.2748         | 10 |
| 13 | 1497.8159 | 749.4116        | 1480.7894      | 740.8983         | 1479.8053      | 740.4063         | P    | 1002.5102 | 501.7587        | 985.4837       | 493.2455         | 984.4997       | 492.7535         | 9  |
| 14 | 1584.8479 | 792.9276        | 1567.8214      | 784.4143         | 1566.8374      | 783.9223         | S    | 905.4575  | 453.2324        | 888.4309       | 444.7191         | 887.4469       | 444.2271         | 8  |
| 15 | 1699.8749 | 850.4411        | 1682.8483      | 841.9278         | 1681.8643      | 841.4358         | D    | 818.4254  | 409.7163        | 801.3989       | 401.2031         | 800.4149       | 400.7111         | 7  |
| 16 | 1800.9226 | 900.9649        | 1783.8960      | 892.4516         | 1782.9120      | 891.9596         | T    | 703.3985  | 352.2029        | 686.3719       | 343.6896         | 685.3879       | 343.1976         | 6  |
| 17 | 1914.0066 | 957.5069        | 1896.9801      | 948.9937         | 1895.9961      | 948.5017         | I    | 602.3508  | 301.6790        | 585.3243       | 293.1658         | 584.3402       | 292.6738         | 5  |
| 18 | 2043.0492 | 1022.0282       | 2026.0227      | 1013.5150        | 2025.0386      | 1013.0230        | E    | 489.2667  | 245.1370        | 472.2402       | 236.6237         | 471.2562       | 236.1317         | 4  |
| 19 | 2157.0921 | 1079.0497       | 2140.0656      | 1070.5364        | 2139.0816      | 1070.0444        | N    | 360.2241  | 180.6157        | 343.1976       | 172.1024         |                |                  | 3  |
| 20 | 2256.1605 | 1128.5839       | 2239.1340      | 1120.0706        | 2238.1500      | 1119.5786        | V    | 246.1812  | 123.5942        | 229.1547       | 115.0810         |                |                  | 2  |
| 21 |           |                 |                |                  |                |                  | K    | 147.1128  | 74.0600         | 130.0863       | 65.5468          |                |                  | 1  |

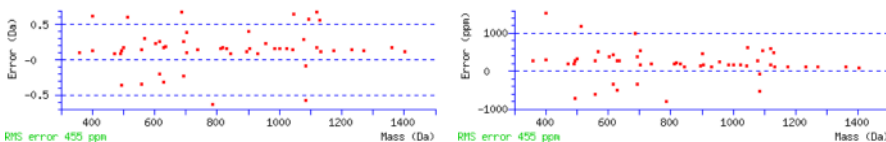

NCBI BLAST search of **TLTGKTITLEVEPSDTIENVK**  
 (Parameters: blastp, nr protein database, expect=20000, no filter, PAM30)  
 Other BLAST [web gateways](#)

**All matches to this query**

| Score | Mr(calc): | Delta   | Sequence                               |
|-------|-----------|---------|----------------------------------------|
| 103.7 | 2401.2588 | 0.4624  | <a href="#">TLTGKTITLEVEPSDTIENVK</a>  |
| 36.8  | 2401.3039 | 0.4173  | <a href="#">MKKIGSIEVPOEAFNLILK</a>    |
| 34.6  | 2401.2377 | 0.4835  | <a href="#">VFLKDDIDGNLDDDDLIIGLK</a>  |
| 34.2  | 2402.2185 | -0.4973 | <a href="#">MAKIQEIIAQMEVTGEGAGLVK</a> |
| 34.0  | 2401.3216 | 0.3995  | <a href="#">SVNVTASLASLEVWSKLDLIK</a>  |
| 31.4  | 2401.2965 | 0.4247  | <a href="#">RAVEEVENVKVESVNTINGLGK</a> |
| 30.9  | 2402.2442 | -0.5230 | <a href="#">TVIGTFVVEGATVEATVEKQGR</a> |
| 29.0  | 2401.3216 | 0.3995  | <a href="#">KVNIASYQVKPGDVIEVKEASK</a> |
| 28.3  | 2400.4257 | 1.2955  | <a href="#">FLIQHVRVFEISNOKLNVK</a>    |
| 28.2  | 2401.3216 | 0.3995  | <a href="#">SVNVTASLASLEVWSKLDLIK</a>  |

**MASCOT** **SCIENCE** Mascot Search Results

Peptide View

MS/MS Fragmentation of **KPVQLPGAYKTDIK**  
 Found in **YD\_RFP-BARD-BRCA-Ub**, YD\_RFP-BARD-BRCA-Ub

Match to Query 534: 1671.089172 from(558.037000,3+) intensity(612517.0000)  
 Title: Cmpd 46, +MSn(558.29), 21.2 min  
 Data file C:\YaelDavid\100203\_YaelDavid\BIT00808\_YD\_2\_merge.mgf

Click mouse within plot area to zoom in by factor of two about that point

Or, Plot from 200 to 1150 Da Full range

Label all possible matches  Label matches used for scoring

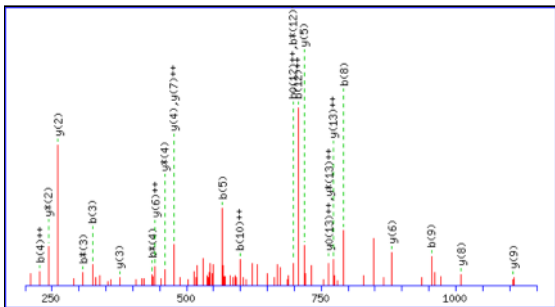

Monoisotopic mass of neutral peptide Mr(calc): 1670.9355  
 Fixed modifications: Carbamidomethyl (C) (apply to specified residues or termini only)  
 Variable modifications:  
 K10 : GlyGly (K)  
 Ions Score: 42 Expect: 0.012  
 Matches : 26/132 fragment ions using 34 most intense peaks ([help](#))

| #  | b         | b <sup>++</sup> | b*        | b <sup>++</sup> | b <sup>0</sup> | b <sup>0++</sup> | Seq. | y         | y <sup>++</sup> | y*        | y <sup>++</sup> | y <sup>0</sup> | y <sup>0++</sup> | #  |
|----|-----------|-----------------|-----------|-----------------|----------------|------------------|------|-----------|-----------------|-----------|-----------------|----------------|------------------|----|
| 1  | 129.1022  | 65.0548         | 112.0757  | 56.5415         |                |                  | K    |           |                 |           |                 |                |                  | 14 |
| 2  | 226.1550  | 113.5811        | 209.1285  | 105.0679        |                |                  | P    | 1543.8479 | 772.4276        | 1526.8213 | 763.9143        | 1525.8373      | 763.4223         | 13 |
| 3  | 325.2234  | 163.1153        | 308.1969  | 154.6021        |                |                  | V    | 1446.7951 | 723.9012        | 1429.7686 | 715.3879        | 1428.7845      | 714.8959         | 12 |
| 4  | 453.2820  | 227.1446        | 436.2554  | 218.6314        |                |                  | Q    | 1347.7267 | 674.3670        | 1330.7001 | 665.8537        | 1329.7161      | 665.3617         | 11 |
| 5  | 566.3661  | 283.6867        | 549.3395  | 275.1734        |                |                  | L    | 1219.6681 | 610.3377        | 1202.6416 | 601.8244        | 1201.6576      | 601.3324         | 10 |
| 6  | 663.4188  | 332.2130        | 646.3923  | 323.6998        |                |                  | P    | 1106.5841 | 553.7957        | 1089.5575 | 545.2824        | 1088.5735      | 544.7904         | 9  |
| 7  | 720.4403  | 360.7238        | 703.4137  | 352.2105        |                |                  | G    | 1009.5313 | 505.2693        | 992.5047  | 496.7560        | 991.5207       | 496.2640         | 8  |
| 8  | 791.4774  | 396.2423        | 774.4509  | 387.7291        |                |                  | A    | 952.5098  | 476.7585        | 935.4833  | 468.2453        | 934.4993       | 467.7533         | 7  |
| 9  | 954.5407  | 477.7740        | 937.5142  | 469.2607        |                |                  | Y    | 881.4727  | 441.2400        | 864.4462  | 432.7267        | 863.4621       | 432.2347         | 6  |
| 10 | 1196.6786 | 598.8429        | 1179.6521 | 590.3297        |                |                  | K    | 718.4094  | 359.7083        | 701.3828  | 351.1951        | 700.3988       | 350.7030         | 5  |
| 11 | 1297.7263 | 649.3668        | 1280.6998 | 640.8535        | 1279.7157      | 640.3615         | T    | 476.2715  | 238.6394        | 459.2449  | 230.1261        | 458.2609       | 229.6341         | 4  |
| 12 | 1412.7532 | 706.8803        | 1395.7267 | 698.3670        | 1394.7427      | 697.8750         | D    | 375.2238  | 188.1155        | 358.1973  | 179.6023        | 357.2132       | 179.1103         | 3  |
| 13 | 1525.8373 | 763.4223        | 1508.8108 | 754.9090        | 1507.8267      | 754.4170         | I    | 260.1969  | 130.6021        | 243.1703  | 122.0888        |                |                  | 2  |
| 14 |           |                 |           |                 |                |                  | K    | 147.1128  | 74.0600         | 130.0863  | 65.5468         |                |                  | 1  |

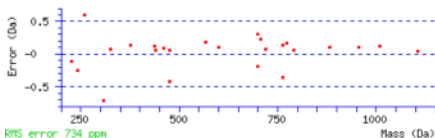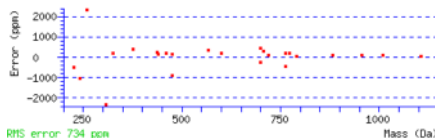

NCBI BLAST search of **KPVQLPGAYKTDIK**  
 (Parameters: blastp, nr protein database, expect=20000, no filter, PAM30)  
 Other BLAST [web gateways](#)

All matches to this query

| Score | Mr(calc): | Delta   | Sequence                         |
|-------|-----------|---------|----------------------------------|
| 42.0  | 1670.9355 | 0.1536  | <a href="#">KPVQLPGAYKTDIK</a>   |
| 28.5  | 1670.9355 | 0.1536  | <a href="#">KPVQLPGAYKTDIK</a>   |
| 20.9  | 1670.9315 | 0.1577  | <a href="#">YTLNNVALGLGSGKSK</a> |
| 18.9  | 1671.9236 | -0.8344 | <a href="#">IFLESKYNTFLGIK</a>   |
| 18.6  | 1670.8951 | 0.1940  | <a href="#">YQVNVGDLEKSKK</a>    |
| 17.1  | 1670.9202 | 0.1689  | <a href="#">EELLKVLQENSKNK</a>   |
| 17.0  | 1669.9502 | 1.1390  | <a href="#">LAVITDSTATLPIDLK</a> |
| 16.3  | 1670.8151 | 0.2741  | <a href="#">NKYNESEFLEALK</a>    |
| 16.2  | 1671.8679 | -0.7787 | <a href="#">QIOTLEIELESQK</a>    |
| 16.0  | 1669.7698 | 1.3194  | <a href="#">MSMRATRIVGEQMK</a>   |

**(MATRIX) (SCIENCE) Mascot Search Results**

**Peptide View**

MS/MS Fragmentation of **TITLEVEPSDTIENVKAK**  
 Found in **YD\_RFP-p53-Ub**, YD\_RFP-p53-Ub

Match to Query 660: 2100.551172 from(701.191000,3+) intensity(337221.0000)  
 Title: Cmpd 88, +MSn(701.69), 26.4 min  
 Data file C:\YaelDavid\100203\_YaelDavid\BIT00808\_YD\_2\_merge.mgf

Click mouse within plot area to zoom in by factor of two about that point  
 Or, Plot from 200 to 1400 Da Full range  
 Label all possible matches  Label matches used for scoring

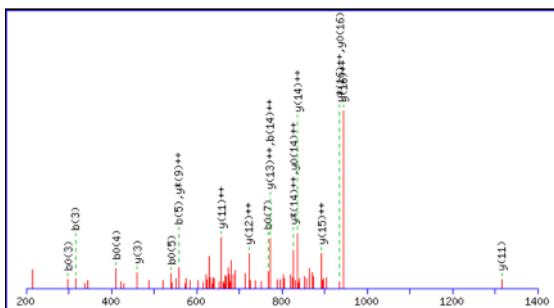

Monoisotopic mass of neutral peptide Mr(calc): 2100.0950  
 Fixed modifications: Carbamidomethyl (C) (apply to specified residues or termini only)  
 Variable modifications:  
 K16 : GlyGly (K)  
 Ions Score: 34 Expect: 0.71  
 Matches : 20/168 Fragment ions using 23 most intense peaks ([help](#))

| #  | b               | b <sup>++</sup> | b*        | b <sup>*++</sup> | b <sup>0</sup>  | b <sup>0++</sup> | Seq. | y                | y <sup>++</sup> | y*        | y <sup>*++</sup> | y <sup>0</sup> | y <sup>0++</sup> | #  |
|----|-----------------|-----------------|-----------|------------------|-----------------|------------------|------|------------------|-----------------|-----------|------------------|----------------|------------------|----|
| 1  | 102.0550        | 51.5311         |           |                  | 84.0444         | 42.5258          | T    |                  |                 |           |                  |                |                  | 18 |
| 2  | 215.1390        | 108.0731        |           |                  | 197.1285        | 99.0679          | I    | 2000.0546        | 1000.5310       | 1983.0281 | 992.0177         | 1982.0441      | 991.5257         | 17 |
| 3  | <b>316.1867</b> | 158.5970        |           |                  | <b>298.1761</b> | 149.5917         | T    | 1886.9706        | <b>943.9889</b> | 1869.9440 | <b>935.4756</b>  | 1868.9600      | <b>934.9836</b>  | 16 |
| 4  | 429.2708        | 215.1390        |           |                  | <b>411.2602</b> | 206.1337         | L    | 1785.9229        | <b>893.4651</b> | 1768.8963 | 884.9518         | 1767.9123      | 884.4598         | 15 |
| 5  | <b>558.3134</b> | 279.6603        |           |                  | <b>540.3028</b> | 270.6550         | E    | 1672.8388        | <b>836.9230</b> | 1655.8123 | <b>828.4098</b>  | 1654.8283      | <b>827.9178</b>  | 14 |
| 6  | 657.3818        | 329.1945        |           |                  | 639.3712        | 320.1892         | V    | 1543.7962        | <b>772.4018</b> | 1526.7697 | 763.8885         | 1525.7857      | 763.3965         | 13 |
| 7  | 786.4244        | 393.7158        |           |                  | <b>768.4138</b> | 384.7105         | E    | 1444.7278        | <b>722.8675</b> | 1427.7013 | 714.3543         | 1426.7172      | 713.8623         | 12 |
| 8  | 883.4771        | 442.2422        |           |                  | 865.4666        | 433.2369         | P    | <b>1315.6852</b> | <b>658.3462</b> | 1298.6587 | 649.8330         | 1297.6747      | 649.3410         | 11 |
| 9  | 970.5092        | 485.7582        |           |                  | 952.4986        | 476.7529         | S    | 1218.6325        | 609.8199        | 1201.6059 | 601.3066         | 1200.6219      | 600.8146         | 10 |
| 10 | 1085.5361       | 543.2717        |           |                  | 1067.5255       | 534.2664         | D    | 1131.6004        | 566.3039        | 1114.5739 | <b>557.7906</b>  | 1113.5899      | 557.2986         | 9  |
| 11 | 1186.5838       | 593.7955        |           |                  | 1168.5732       | 584.7902         | T    | 1016.5735        | 508.7904        | 999.5469  | 500.2771         | 998.5629       | 499.7851         | 8  |
| 12 | 1299.6678       | 650.3376        |           |                  | 1281.6573       | 641.3323         | I    | 915.5258         | 458.2665        | 898.4993  | 449.7533         | 897.5152       | 449.2613         | 7  |
| 13 | 1428.7104       | 714.8589        |           |                  | 1410.6999       | 705.8536         | E    | 802.4417         | 401.7245        | 785.4152  | 393.2112         | 784.4312       | 392.7192         | 6  |
| 14 | 1542.7534       | <b>771.8803</b> | 1525.7268 | 763.3670         | 1524.7428       | 762.8750         | N    | 673.3991         | 337.2032        | 656.3726  | 328.6899         |                |                  | 5  |
| 15 | 1641.8218       | 821.4145        | 1624.7952 | 812.9013         | 1623.8112       | 812.4092         | V    | 559.3562         | 280.1817        | 542.3297  | 271.6685         |                |                  | 4  |
| 16 | 1883.9597       | 942.4835        | 1866.9331 | 933.9702         | 1865.9491       | 933.4782         | K    | <b>460.2878</b>  | 230.6475        | 443.2613  | 222.1343         |                |                  | 3  |
| 17 | 1954.9968       | 978.0020        | 1937.9702 | 969.4888         | 1936.9862       | 968.9967         | A    | 218.1499         | 109.5786        | 201.1234  | 101.0653         |                |                  | 2  |
| 18 |                 |                 |           |                  |                 |                  | K    | 147.1128         | 74.0600         | 130.0863  | 65.5468          |                |                  | 1  |

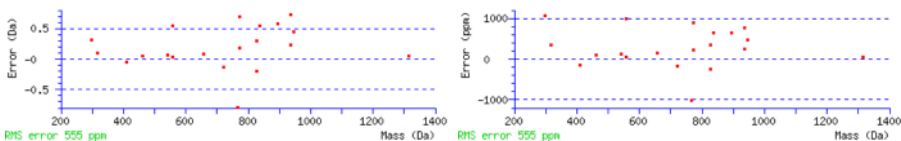

NCBI BLAST search of **TITLEVEPSDTIENVKAK**  
 (Parameters: blastp, nr protein database, expect=20000, no filter, PAM30)  
 Other BLAST [web gateways](#)

**All matches to this query**

| Score | Mr(calc): | Delta   | Sequence                             |
|-------|-----------|---------|--------------------------------------|
| 34.5  | 2100.0950 | 0.4562  | <a href="#">TITLEVEPSDTIENVKAK</a>   |
| 34.5  | 2100.0950 | 0.4562  | <a href="#">TITLEVEPSDTIENVKAK</a>   |
| 31.8  | 2100.1116 | 0.4396  | <a href="#">EWLEQRIDLVPYLRDR</a>     |
| 29.9  | 2101.0287 | -0.4775 | <a href="#">ELEGEVDAEQKRSAAVAK</a>   |
| 25.9  | 2101.1630 | -0.6118 | <a href="#">TLSQENLVKLTLESNATLK</a>  |
| 23.5  | 2101.0803 | -0.5292 | <a href="#">NNSLEDLQWTLIKKDNK</a>    |
| 23.2  | 2099.0494 | 1.5017  | <a href="#">RGVKTEIEGEQVAAIAIQ</a>   |
| 20.2  | 2099.9728 | 0.5784  | <a href="#">TNGDFSTNMAMQLARVAK</a>   |
| 19.9  | 2100.1579 | 0.3933  | <a href="#">NVTPELLGKVKELTEGK</a>    |
| 19.1  | 2101.1280 | -0.5768 | <a href="#">TLTLEAGRFAEQANGAVVVR</a> |

**(MATRIX SCIENCE) Mascot Search Results**

**Peptide View**

MS/MS Fragmentation of **NLLHDNELSDLKEDGGSGGDL SALR**  
 Found in **YD\_RFP-BARD-BRCA-Ub**, YD\_RFP-BARD-BRCA-Ub

Match to Query 845: 2738.774172 from(913.932000,3+) intensity(1061195.0000)  
 Title: Cmpd 117, +MSn(914.43), 27.7 min  
 Data file C:\YaelDavid\100203\_YaelDavid\BIT00808\_YD\_2\_merge.mgf

Click mouse within plot area to zoom in by factor of two about that point  
 Or, Plot from 200 to 1700 Da Full range  
 Label all possible matches Label matches used for scoring

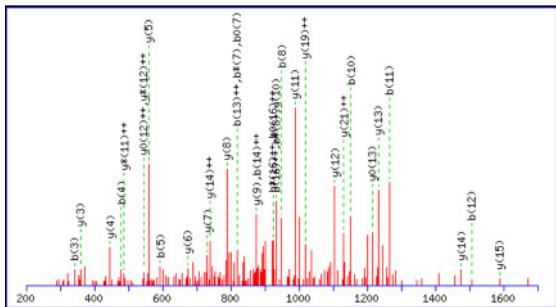

Monoisotopic mass of neutral peptide Mr(calc): 2738.3107  
 Fixed modifications: Carbamidomethyl (C) (apply to specified residues or termini only)  
 Variable modifications: K12 : GlyGly (K)  
 Ions Score: 94 Expect: 2.9e-07  
 Matches : 35/274 Fragment ions using 39 most intense peaks (help)

| #  | b                | b <sup>++</sup> | b <sup>*</sup>  | b <sup>*++</sup> | b <sup>0</sup>  | b <sup>0++</sup> | Seq. | y                | y <sup>++</sup>  | y <sup>*</sup> | y <sup>*++</sup> | y <sup>0</sup>   | y <sup>0++</sup> | #  |
|----|------------------|-----------------|-----------------|------------------|-----------------|------------------|------|------------------|------------------|----------------|------------------|------------------|------------------|----|
| 1  | 115.0502         | 58.0287         | 98.0237         | 49.5155          |                 |                  | N    |                  |                  |                |                  |                  |                  | 25 |
| 2  | 228.1343         | 114.5708        | 211.1077        | 106.0575         |                 |                  | L    | 2625.2751        | 1313.1412        | 2608.2485      | 1304.6279        | 2607.2645        | 1304.1359        | 24 |
| 3  | <b>341.2183</b>  | 171.1128        | 324.1918        | 162.5995         |                 |                  | L    | 2512.1910        | 1256.5991        | 2495.1645      | 1248.0859        | 2494.1804        | 1247.5939        | 23 |
| 4  | <b>478.2772</b>  | 239.6423        | 461.2507        | 231.1290         |                 |                  | H    | 2399.1069        | 1200.0571        | 2382.0804      | 1191.5438        | 2381.0964        | 1191.0518        | 22 |
| 5  | <b>593.3042</b>  | 297.1557        | 576.2776        | 288.6425         | 575.2936        | 288.1504         | D    | 2262.0480        | <b>1131.5277</b> | 2245.0215      | 1123.0144        | 2244.0375        | 1122.5224        | 21 |
| 6  | 707.3471         | 354.1772        | 690.3206        | 345.6639         | 689.3365        | 345.1719         | N    | 2147.0211        | 1074.0142        | 2129.9945      | 1065.5009        | 2129.0105        | 1065.0089        | 20 |
| 7  | 836.3897         | 418.6985        | <b>819.3632</b> | 410.1852         | <b>818.3791</b> | 409.6932         | E    | 2032.9782        | <b>1016.9927</b> | 2015.9516      | 1008.4794        | 2014.9676        | 1007.9874        | 19 |
| 8  | <b>949.4738</b>  | 475.2405        | <b>932.4472</b> | 466.7272         | 931.4632        | 466.2352         | L    | 1903.9356        | 952.4714         | 1886.9090      | 943.9582         | 1885.9250        | 943.4661         | 18 |
| 9  | 1036.5058        | 518.7565        | 1019.4792       | 510.2433         | 1018.4952       | 509.7513         | S    | 1790.8515        | 895.9294         | 1773.8250      | 887.4161         | 1772.8409        | 886.9241         | 17 |
| 10 | <b>1151.5327</b> | 576.2700        | 1134.5062       | 567.7567         | 1133.5222       | 567.2647         | D    | 1703.8195        | 852.4134         | 1686.7929      | 843.9001         | 1685.8089        | 843.4081         | 16 |
| 11 | <b>1264.6168</b> | 632.8120        | 1247.5903       | 624.2988         | 1246.6062       | 623.8068         | L    | <b>1588.7925</b> | 794.8999         | 1571.7660      | 786.3866         | 1570.7820        | 785.8946         | 15 |
| 12 | <b>1506.7547</b> | 753.8810        | 1489.7281       | 745.3677         | 1488.7441       | 744.8757         | K    | <b>1475.7085</b> | <b>738.3579</b>  | 1458.6819      | 729.8446         | 1457.6979        | 729.3526         | 14 |
| 13 | 1635.7973        | <b>818.4023</b> | 1618.7707       | 809.8890         | 1617.7867       | 809.3970         | E    | <b>1233.5706</b> | 617.2889         | 1216.5440      | 608.7757         | <b>1215.5600</b> | 608.2836         | 13 |
| 14 | 1750.8242        | <b>875.9158</b> | 1733.7977       | 867.4025         | 1732.8137       | 866.9105         | D    | <b>1104.5280</b> | 552.7676         | 1087.5014      | <b>544.2544</b>  | 1086.5174        | <b>543.7624</b>  | 12 |
| 15 | 1807.8457        | 904.4265        | 1790.8191       | 895.9132         | 1789.8351       | 895.4212         | G    | <b>989.5010</b>  | 495.2542         | 972.4745       | <b>486.7409</b>  | 971.4905         | 486.2489         | 11 |
| 16 | 1864.8672        | <b>932.9372</b> | 1847.8406       | <b>924.4239</b>  | 1846.8566       | <b>923.9319</b>  | G    | <b>932.4796</b>  | 466.7434         | 915.4530       | 458.2302         | 914.4690         | 457.7381         | 10 |
| 17 | 1951.8992        | 976.4532        | 1934.8726       | 967.9400         | 1933.8886       | 967.4479         | S    | <b>875.4581</b>  | 438.2327         | 858.4316       | 429.7194         | 857.4476         | 429.2274         | 9  |
| 18 | 2008.9207        | 1004.9640       | 1991.8941       | 996.4507         | 1990.9101       | 995.9587         | G    | <b>788.4261</b>  | 394.7167         | 771.3995       | 386.2034         | 770.4155         | 385.7114         | 8  |
| 19 | 2065.9421        | 1033.4747       | 2048.9156       | 1024.9614        | 2047.9315       | 1024.4694        | G    | <b>731.4046</b>  | 366.2060         | 714.3781       | 357.6927         | 713.3941         | 357.2007         | 7  |
| 20 | 2180.9691        | 1090.9882       | 2163.9425       | 1082.4749        | 2162.9585       | 1081.9829        | D    | <b>674.3832</b>  | 337.6952         | 657.3566       | 329.1819         | 656.3726         | 328.6899         | 6  |
| 21 | 2294.0531        | 1147.5302       | 2277.0266       | 1139.0169        | 2276.0426       | 1138.5249        | L    | <b>559.3562</b>  | 280.1817         | 542.3297       | 271.6685         | 541.3457         | 271.1765         | 5  |
| 22 | 2381.0851        | 1191.0462       | 2364.0586       | 1182.5329        | 2363.0746       | 1182.0409        | S    | <b>446.2722</b>  | 223.6397         | 429.2456       | 215.1264         | 428.2616         | 214.6344         | 4  |
| 23 | 2452.1223        | 1226.5648       | 2435.0957       | 1218.0515        | 2434.1117       | 1217.5595        | A    | <b>359.2401</b>  | 180.1237         | 342.2136       | 171.6104         |                  |                  | 3  |
| 24 | 2565.2063        | 1283.1068       | 2548.1798       | 1274.5935        | 2547.1958       | 1274.1015        | L    | 288.2030         | 144.6051         | 271.1765       | 136.0919         |                  |                  | 2  |
| 25 |                  |                 |                 |                  |                 |                  | R    | 175.1190         | 88.0631          | 158.0924       | 79.5498          |                  |                  | 1  |

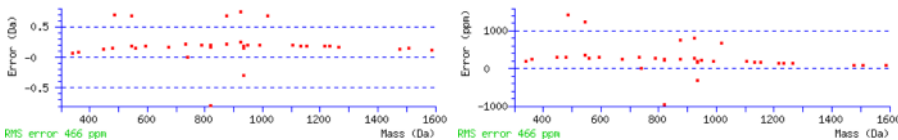

NCBI BLAST search of **NLLHDNELSDLKEDGGSGGDL SALR**  
 (Parameters: blastp, nr protein database, expect=20000, no filter, PAM30)  
 Other BLAST [web gateways](#)

**All matches to this query**

| Score | Mr(calc): | Delta   | Sequence                                   |
|-------|-----------|---------|--------------------------------------------|
| 93.5  | 2738.3107 | 0.4635  | <a href="#">NLLHDNELSDLKEDGGSGGDL SALR</a> |
| 23.2  | 2738.3376 | 0.4366  | <a href="#">MIIPANINHVNLEPMCIGIASOCK</a>   |
| 22.6  | 2738.3448 | 0.4294  | <a href="#">MSRALMIQGTGSNVGKSMLAAGLCR</a>  |
| 20.8  | 2739.2156 | -0.4415 | <a href="#">KDLNPGDNPEAEFPVEMASDFMVR</a>   |
| 20.6  | 2738.2469 | 0.5273  | <a href="#">AAMGHPEPFELKYVAVGNEDCFK</a>    |
| 20.6  | 2738.3029 | 0.4713  | <a href="#">KQTSTKSMIGLLVQDTNDSDEK</a>     |
| 20.4  | 2739.3062 | -0.5320 | <a href="#">FGGOVLDTMAIENFISVQETEGPK</a>   |
| 19.6  | 2737.3415 | 1.4327  | <a href="#">KGGKVFVDDQEGMATILAMVNAEK</a>   |
| 18.0  | 2739.2698 | -0.4956 | <a href="#">EDQVFLGDLPLMTDDGSEVINGADR</a>  |



|      |           |        |                                           |
|------|-----------|--------|-------------------------------------------|
| 17.1 | 2738.2784 | 0.4958 | <a href="#">DADLGSNTTYKVAEGINPNAFDGOK</a> |
|------|-----------|--------|-------------------------------------------|

|                                                                                          |
|------------------------------------------------------------------------------------------|
| <b>Mascot:</b> <a href="http://www.matrixscience.com/">http://www.matrixscience.com/</a> |
|------------------------------------------------------------------------------------------|

**(MATRIX) (SCIENCE) Mascot Search Results**

**Peptide View**

MS/MS Fragmentation of **LIFAGKQLEDGR**

Found in **YD\_RFP-BARD-BRCA-Ub**, YD\_RFP-BARD-BRCA-Ub

Match to Query 438: 1460.037448 from(731.026000,2+) intensity(2409720.0000)

Title: Cmpd 82, +MSn(731.22), 24.4 min

Data file C:\YaelDavid\100203\_YaelDavid\BIT00808\_YD\_2\_merge.mgf

Click mouse within plot area to zoom in by factor of two about that point

Or, Plot from 200 to 1500 Da Full range

Label all possible matches Label matches used for scoring

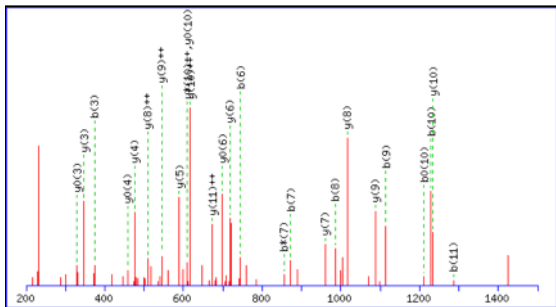

Monoisotopic mass of neutral peptide Mr(calc): 1459.7783

Fixed modifications: Carbamidomethyl (C) (apply to specified residues or termini only)

Variable modifications:

K6 : GlyGly (K)

Ions Score: 74 Expect: 4.9e-05

Matches : 26/102 Fragment ions using 32 most intense peaks (help)

| #  | b         | b <sup>++</sup> | b*        | b <sup>*++</sup> | b <sup>0</sup> | b <sup>0++</sup> | Seq. | y         | y <sup>++</sup> | y*        | y <sup>*++</sup> | y <sup>0</sup> | y <sup>0++</sup> | #  |
|----|-----------|-----------------|-----------|------------------|----------------|------------------|------|-----------|-----------------|-----------|------------------|----------------|------------------|----|
| 1  | 114.0913  | 57.5493         |           |                  |                |                  | L    |           |                 |           |                  |                |                  | 12 |
| 2  | 227.1754  | 114.0913        |           |                  |                |                  | I    | 1347.7015 | 674.3544        | 1330.6750 | 665.8411         | 1329.6910      | 665.3491         | 11 |
| 3  | 374.2438  | 187.6255        |           |                  |                |                  | F    | 1234.6175 | 617.8124        | 1217.5909 | 609.2991         | 1216.6069      | 608.8071         | 10 |
| 4  | 445.2809  | 223.1441        |           |                  |                |                  | A    | 1087.5491 | 544.2782        | 1070.5225 | 535.7649         | 1069.5385      | 535.2729         | 9  |
| 5  | 502.3024  | 251.6548        |           |                  |                |                  | G    | 1016.5119 | 508.7596        | 999.4854  | 500.2463         | 998.5014       | 499.7543         | 8  |
| 6  | 744.4403  | 372.7238        | 727.4137  | 364.2105         |                |                  | K    | 959.4905  | 480.2489        | 942.4639  | 471.7356         | 941.4799       | 471.2436         | 7  |
| 7  | 872.4989  | 436.7531        | 855.4723  | 428.2398         |                |                  | Q    | 717.3526  | 359.1799        | 700.3260  | 350.6667         | 699.3420       | 350.1747         | 6  |
| 8  | 985.5829  | 493.2951        | 968.5564  | 484.7818         |                |                  | L    | 589.2940  | 295.1506        | 572.2675  | 286.6374         | 571.2835       | 286.1454         | 5  |
| 9  | 1114.6255 | 557.8164        | 1097.5990 | 549.3031         | 1096.6150      | 548.8111         | E    | 476.2100  | 238.6086        | 459.1834  | 230.0953         | 458.1994       | 229.6033         | 4  |
| 10 | 1229.6525 | 615.3299        | 1212.6259 | 606.8166         | 1211.6419      | 606.3246         | D    | 347.1674  | 174.0873        | 330.1408  | 165.5740         | 329.1568       | 165.0820         | 3  |
| 11 | 1286.6739 | 643.8406        | 1269.6474 | 635.3273         | 1268.6634      | 634.8353         | G    | 232.1404  | 116.5738        | 215.1139  | 108.0606         |                |                  | 2  |
| 12 |           |                 |           |                  |                |                  | R    | 175.1190  | 88.0631         | 158.0924  | 79.5498          |                |                  | 1  |

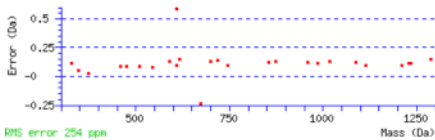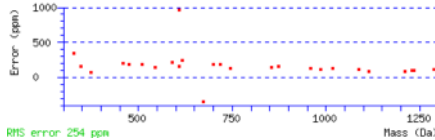

NCBI BLAST search of **LIFAGKQLEDGR**

(Parameters: blastp, nr protein database, expect=20000, no filter, PAM30)

Other BLAST [web gateways](#)

All matches to this query

| Score | Mr(calc): | Delta   | Sequence                      |
|-------|-----------|---------|-------------------------------|
| 74.3  | 1459.7783 | 0.2591  | <a href="#">LIFAGKQLEDGR</a>  |
| 27.4  | 1459.6725 | 0.3649  | <a href="#">EAAALQCQLEDGR</a> |
| 26.6  | 1460.7987 | -0.7613 | <a href="#">AGVFVKVDEIK</a>   |
| 26.6  | 1460.7987 | -0.7613 | <a href="#">AGVFVKVDELK</a>   |
| 21.3  | 1459.6903 | 0.3472  | <a href="#">DEEKKEEVQGR</a>   |
| 21.2  | 1460.7544 | -0.7170 | <a href="#">NIEMQQLLSK</a>    |
| 20.5  | 1459.8432 | 0.1942  | <a href="#">SGMVTLKLEKIK</a>  |
| 20.2  | 1459.8293 | 0.2082  | <a href="#">LTRMIRTAGALK</a>  |
| 19.8  | 1459.8068 | 0.2307  | <a href="#">ILQEKMEKAIK</a>   |
| 19.2  | 1459.7307 | 0.3068  | <a href="#">ALENALPYLEDGR</a> |

Mascot: <http://www.matrixscience.com/>

**MASCOT** (SCIENCE) Mascot Search Results

Peptide View

MS/MS Fragmentation of **TLSDYNIQKESTLHLVLR**  
 Found in **YD\_RFP-BARD-BRCA-Ub**, YD\_RFP-BARD-BRCA-Ub

Match to Query 748: 2243.468172 from(748.830000,3+) intensity(240773.0000)  
 Title: Cmpd 103, +MSn(749.43), 27.7 min  
 Data file C:\YaelDavid\100203\_YaelDavid\BIT00808\_YD\_2\_merge.mgf

Click mouse within plot area to zoom in by factor of two about that point  
 Or, Plot from 200 to 1400 Da Full range  
 Label all possible matches  Label matches used for scoring

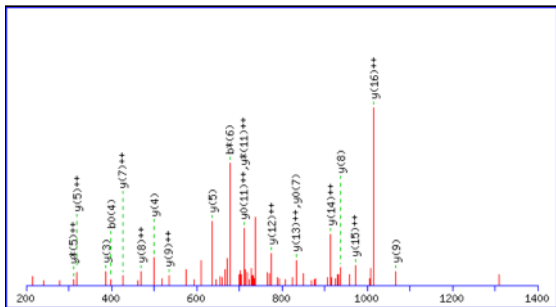

Monoisotopic mass of neutral peptide Mr(calc): 2243.1910  
 Fixed modifications: Carbamidomethyl (C) (apply to specified residues or termini only)  
 Variable modifications:  
 K9 : GlyGly (K)  
 Ions Score: 57 Expect: 0.0026  
 Matches : 20/182 Fragment ions using 26 most intense peaks ([help](#))

| #  | b         | b <sup>++</sup> | b <sup>*</sup> | b <sup>s++</sup> | b <sup>0</sup> | b <sup>0++</sup> | Seq. | y         | y <sup>++</sup> | y <sup>*</sup> | y <sup>s++</sup> | y <sup>0</sup> | y <sup>0++</sup> | #  |
|----|-----------|-----------------|----------------|------------------|----------------|------------------|------|-----------|-----------------|----------------|------------------|----------------|------------------|----|
| 1  | 102.0550  | 51.5311         |                |                  | 84.0444        | 42.5258          | T    |           |                 |                |                  |                |                  | 18 |
| 2  | 215.1390  | 108.0731        |                |                  | 197.1285       | 99.0679          | L    | 2143.1506 | 1072.0789       | 2126.1240      | 1063.5657        | 2125.1400      | 1063.0737        | 17 |
| 3  | 302.1710  | 151.5892        |                |                  | 284.1605       | 142.5839         | S    | 2030.0665 | 1015.5369       | 2013.0400      | 1007.0236        | 2012.0560      | 1006.5316        | 16 |
| 4  | 417.1980  | 209.1026        |                |                  | 399.1874       | 200.0974         | D    | 1943.0345 | 972.0209        | 1926.0080      | 963.5076         | 1925.0239      | 963.0156         | 15 |
| 5  | 580.2613  | 290.6343        |                |                  | 562.2508       | 281.6290         | Y    | 1828.0076 | 914.5074        | 1810.9810      | 905.9941         | 1809.9970      | 905.5021         | 14 |
| 6  | 694.3042  | 347.6558        | 677.2777       | 339.1425         | 676.2937       | 338.6505         | N    | 1664.9442 | 832.9758        | 1647.9177      | 824.4625         | 1646.9337      | 823.9705         | 13 |
| 7  | 807.3883  | 404.1978        | 790.3618       | 395.6845         | 789.3777       | 395.1925         | I    | 1550.9013 | 775.9543        | 1533.8748      | 767.4410         | 1532.8907      | 766.9490         | 12 |
| 8  | 935.4469  | 468.2271        | 918.4203       | 459.7138         | 917.4363       | 459.2218         | Q    | 1437.8172 | 719.4123        | 1420.7907      | 710.8990         | 1419.8067      | 710.4070         | 11 |
| 9  | 1177.5848 | 589.2960        | 1160.5582      | 580.7828         | 1159.5742      | 580.2907         | K    | 1309.7587 | 655.3830        | 1292.7321      | 646.8697         | 1291.7481      | 646.3777         | 10 |
| 10 | 1306.6274 | 653.8173        | 1289.6008      | 645.3040         | 1288.6168      | 644.8120         | E    | 1067.6208 | 534.3140        | 1050.5942      | 525.8007         | 1049.6102      | 525.3087         | 9  |
| 11 | 1393.6594 | 697.3333        | 1376.6329      | 688.8201         | 1375.6488      | 688.3281         | S    | 938.5782  | 469.7927        | 921.5516       | 461.2795         | 920.5676       | 460.7874         | 8  |
| 12 | 1494.7071 | 747.8572        | 1477.6805      | 739.3439         | 1476.6965      | 738.8519         | T    | 851.5461  | 426.2767        | 834.5196       | 417.7634         | 833.5356       | 417.2714         | 7  |
| 13 | 1607.7911 | 804.3992        | 1590.7646      | 795.8859         | 1589.7806      | 795.3939         | L    | 750.4985  | 375.7529        | 733.4719       | 367.2396         |                |                  | 6  |
| 14 | 1744.8501 | 872.9287        | 1727.8235      | 864.4154         | 1726.8395      | 863.9234         | H    | 637.4144  | 319.2108        | 620.3879       | 310.6976         |                |                  | 5  |
| 15 | 1857.9341 | 929.4707        | 1840.9076      | 920.9574         | 1839.9236      | 920.4654         | L    | 500.3555  | 250.6814        | 483.3289       | 242.1681         |                |                  | 4  |
| 16 | 1957.0025 | 979.0049        | 1939.9760      | 970.4916         | 1938.9920      | 969.9996         | V    | 387.2714  | 194.1394        | 370.2449       | 185.6261         |                |                  | 3  |
| 17 | 2070.0866 | 1035.5469       | 2053.0600      | 1027.0337        | 2052.0760      | 1026.5417        | L    | 288.2030  | 144.6051        | 271.1765       | 136.0919         |                |                  | 2  |
| 18 |           |                 |                |                  |                |                  | R    | 175.1190  | 88.0631         | 158.0924       | 79.5498          |                |                  | 1  |

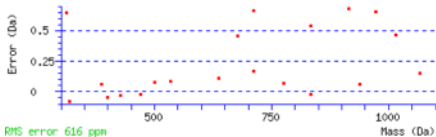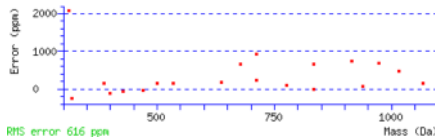

NCBI BLAST search of **TLSDYNIQKESTLHLVLR**  
 (Parameters: blastp, nr protein database, expect=20000, no filter, PAM30)  
 Other BLAST [web gateways](#)

All matches to this query

| Score | Mr(calc): | Delta   | Sequence                             |
|-------|-----------|---------|--------------------------------------|
| 56.6  | 2243.1910 | 0.2772  | <a href="#">TLSDYNIQKESTLHLVLR</a>   |
| 28.0  | 2243.9582 | -0.4900 | <a href="#">EGSPYPMHGEGETGEPAYFR</a> |
| 18.6  | 2244.1718 | -0.7037 | <a href="#">TNQMPNAVOKLLLVMDKR</a>   |
| 18.6  | 2244.1718 | -0.7037 | <a href="#">TNQMPNAVOKLLLVMDKR</a>   |
| 17.3  | 2244.0667 | -0.5985 | <a href="#">KFMYSQSSIPMTPNGKVDR</a>  |
| 17.3  | 2243.9827 | -0.5146 | <a href="#">VMGDAEMTSELGEHFGFSR</a>  |
| 17.2  | 2244.2954 | -0.8272 | <a href="#">KSLLIKGISYQQAVSVLGAR</a> |
| 16.5  | 2244.1361 | -0.6679 | <a href="#">TAKLPEKPDNCGEIHWGG</a>   |
| 15.8  | 2244.1514 | -0.6832 | <a href="#">TALMNYLFAKHYNGSFIVR</a>  |
| 15.6  | 2243.8947 | -0.4265 | <a href="#">GENVTIDEDEGFEACMEEQR</a> |

(MATRIX) Mascot Search Results (SCIENCE)

Protein View

Match to: YD\_RFP-BARD-BRCA-Ub Score: 4780

YD\_RFP-BARD-BRCA-Ub

Found in search of C:\YaelDavid\100203\_YaelDavid\BIT00810\_YD\_3\_merge.mgf

Nominal mass (M+): 60628; Calculated pI value: 6.10

NCBI BLAST search of YD\_RFP-BARD-BRCA-Ub against nr

Unformatted sequence string for pasting into other applications

Fixed modifications: Carbamidomethyl (C)

Variable modifications: GlyGly (K), Oxidation (M)

Cleavage by Trypsin: cuts C-term side of KR unless next residue is P

Sequence Coverage: 60%

Matched peptides shown in Bold Red

1 MHHHHHHHASS EDVKEFMRF KVRMEGSVNG HEFEEI EGEE GRPYEGTQTA
51 KLKVTKGGPL PFAMWLLSPQ FQYQSKAYVK HPADIPDYLK LSFPEGFKWE
101 RVAMNFDGGV VVTQDSSLQ DGEFIYKVKL RGTNFFSDGP VMQKRTMGEW
151 ASTERMPYED GALKGEIKMR LKLDGGHYD AENVTTYMAK KPVQLPGAYK
201 TDIKLDTFSH NEDTIVTEQR ERLEGHSHGYS AENLLYQGLE EFDGGAWAH
251 SRALLDRLEK LLRCSRWLT LRPVCLGGC EHLFOSNOVS DCLGTGCPVC
301 YTPAIIQDLK INRQLDSMIQ LCSKLRNLLH DNELSDLIKED GSGGSDLSAL
351 RVREYQNVIN AMQKILCEPI CLEELKEPVS TKCDHIFCKF CMLKLLNQKK
401 GFSQCPLCKN DITRSLQES TRFSQLEVER LKILICARQLD TGLEYSANYN
451 FAKQIFVKTL TKGKTTIEVE PSTTIENVKA KIQKREGIPP DQQRLLIFAGK
501 QLEDGRSLD YNIQKRESLH LVLRLRGG

Show predicted peptides also

Sort Peptides By \* Residue Number \* Increasing Mass \* Decreasing Mass

Table with columns: Start, End, Observed, Mr (expt), Mr (calc), Delta, Miss, Sequence. It lists 338 peptides with their mass, Mr values, and sequences. Many sequences include score links like (Ions score 45) or (Ions score 12).



**MASCOT** Mascot Search Results

Peptide View

MS/MS Fragmentation of **TLTGKTITLEVEPSDTIENVK**  
 Found in **YD\_RFP-BARD-BRCA-Ub**, YD\_RFP-BARD-BRCA-Ub

Match to Query 791: 2401.583172 from(801.535000,3+) intensity(1561290.0000)  
 Title: Cmpd 114, +MSn(801.89), 27.1 min  
 Data file C:\YaelDavid\100203\_YaelDavid\BIT00810\_YD\_3\_merge.mgf

Click mouse within plot area to zoom in by factor of two about that point

Or, Plot from 200 to 1500 Da Full range

Label all possible matches  Label matches used for scoring

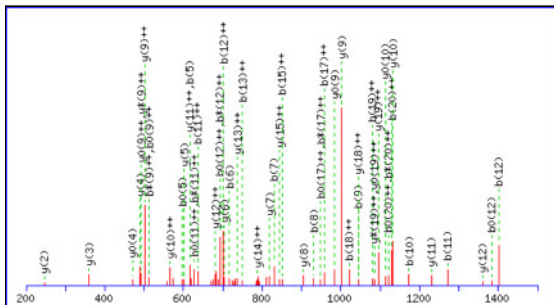

Monoisotopic mass of neutral peptide Mr(calc): 2401.2588  
**Fixed modifications:** Carbamidomethyl (C) (apply to specified residues or termini only)  
**Variable modifications:**  
 K5 : GlyGly (K)  
**Ions Score:** 105 **Expect:** 1.8e-07  
**Matches :** 55/226 fragment ions using 58 most intense peaks ([help](#))

| #  | b         | b <sup>++</sup> | b <sup>*</sup> | b <sup>s++</sup> | b <sup>0</sup> | b <sup>0++</sup> | Seq. | y         | y <sup>++</sup> | y <sup>*</sup> | y <sup>s++</sup> | y <sup>0</sup> | y <sup>0++</sup> | #  |
|----|-----------|-----------------|----------------|------------------|----------------|------------------|------|-----------|-----------------|----------------|------------------|----------------|------------------|----|
| 1  | 102.0550  | 51.5311         |                |                  | 84.0444        | 42.5258          | T    |           |                 |                |                  |                |                  | 21 |
| 2  | 215.1390  | 108.0731        |                |                  | 197.1285       | 99.0679          | L    | 2301.2184 | 1151.1128       | 2284.1918      | 1142.5996        | 2283.2078      | 1142.1076        | 20 |
| 3  | 316.1867  | 158.5970        |                |                  | 298.1761       | 149.5917         | T    | 2188.1343 | 1094.5708       | 2171.1078      | 1086.0575        | 2170.1238      | 1085.5655        | 19 |
| 4  | 373.2082  | 187.1077        |                |                  | 355.1976       | 178.1024         | G    | 2087.0867 | 1044.0470       | 2070.0601      | 1035.5337        | 2069.0761      | 1035.0417        | 18 |
| 5  | 615.3461  | 308.1767        | 598.3195       | 299.6634         | 597.3355       | 299.1714         | K    | 2030.0652 | 1015.5362       | 2013.0386      | 1007.0230        | 2012.0546      | 1006.5310        | 17 |
| 6  | 716.3937  | 358.7005        | 699.3672       | 350.1872         | 698.3832       | 349.6952         | T    | 1787.9273 | 894.4673        | 1770.9008      | 885.9540         | 1769.9167      | 885.4620         | 16 |
| 7  | 829.4778  | 415.2425        | 812.4512       | 406.7293         | 811.4672       | 406.2373         | I    | 1686.8796 | 843.9434        | 1669.8531      | 835.4302         | 1668.8691      | 834.9382         | 15 |
| 8  | 930.5255  | 465.7664        | 913.4989       | 457.2531         | 912.5149       | 456.7611         | T    | 1573.7956 | 787.4014        | 1556.7690      | 778.8881         | 1555.7850      | 778.3961         | 14 |
| 9  | 1043.6095 | 522.3084        | 1026.5830      | 513.7951         | 1025.5990      | 513.3031         | L    | 1472.7479 | 736.8776        | 1455.7213      | 728.3643         | 1454.7373      | 727.8723         | 13 |
| 10 | 1172.6521 | 586.8297        | 1155.6256      | 578.3164         | 1154.6416      | 577.8244         | E    | 1359.6638 | 680.3355        | 1342.6373      | 671.8223         | 1341.6533      | 671.3303         | 12 |
| 11 | 1271.7205 | 636.3639        | 1254.6940      | 627.8506         | 1253.7100      | 627.3586         | V    | 1230.6212 | 615.8142        | 1213.5947      | 607.3010         | 1212.6107      | 606.8090         | 11 |
| 12 | 1400.7631 | 700.8852        | 1383.7366      | 692.3719         | 1382.7526      | 691.8799         | E    | 1131.5528 | 566.2800        | 1114.5263      | 557.7668         | 1113.5422      | 557.2748         | 10 |
| 13 | 1497.8159 | 749.4116        | 1480.7894      | 740.8983         | 1479.8053      | 740.4063         | P    | 1002.5102 | 501.7587        | 985.4837       | 493.2455         | 984.4997       | 492.7535         | 9  |
| 14 | 1584.8479 | 792.9276        | 1567.8214      | 784.4143         | 1566.8374      | 783.9223         | S    | 905.4575  | 453.2324        | 888.4309       | 444.7191         | 887.4469       | 444.2271         | 8  |
| 15 | 1699.8749 | 850.4411        | 1682.8483      | 841.9278         | 1681.8643      | 841.4358         | D    | 818.4254  | 409.7163        | 801.3989       | 401.2031         | 800.4149       | 400.7111         | 7  |
| 16 | 1800.9226 | 900.9649        | 1783.8960      | 892.4516         | 1782.9120      | 891.9596         | T    | 703.3985  | 352.2029        | 686.3719       | 343.6896         | 685.3879       | 343.1976         | 6  |
| 17 | 1914.0066 | 957.5069        | 1896.9801      | 948.9937         | 1895.9961      | 948.5017         | I    | 602.3508  | 301.6790        | 585.3243       | 293.1658         | 584.3402       | 292.6738         | 5  |
| 18 | 2043.0492 | 1022.0282       | 2026.0227      | 1013.5150        | 2025.0386      | 1013.0230        | E    | 489.2667  | 245.1370        | 472.2402       | 236.6237         | 471.2562       | 236.1317         | 4  |
| 19 | 2157.0921 | 1079.0497       | 2140.0656      | 1070.5364        | 2139.0816      | 1070.0444        | N    | 360.2241  | 180.6157        | 343.1976       | 172.1024         |                |                  | 3  |
| 20 | 2256.1605 | 1128.5839       | 2239.1340      | 1120.0706        | 2238.1500      | 1119.5786        | V    | 246.1812  | 123.5942        | 229.1547       | 115.0810         |                |                  | 2  |
| 21 |           |                 |                |                  |                |                  | K    | 147.1128  | 74.0600         | 130.0863       | 65.5468          |                |                  | 1  |

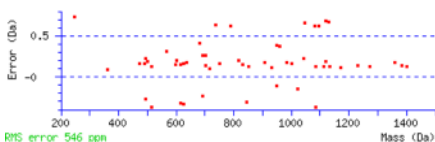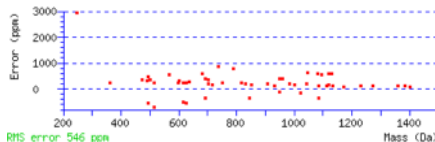

NCBI BLAST search of **TLTGKTITLEVEPSDTIENVK**  
 (Parameters: blastp, nr protein database, expect=20000, no filter, PAM30)  
 Other BLAST [web gateways](#)

All matches to this query

| Score | Mr(calc): | Delta   | Sequence                               |
|-------|-----------|---------|----------------------------------------|
| 105.0 | 2401.2588 | 0.3244  | <a href="#">TLTGKTITLEVEPSDTIENVK</a>  |
| 32.4  | 2401.3216 | 0.2615  | <a href="#">KVNIASYQVKPGDVIEVKEASK</a> |
| 30.5  | 2401.1543 | 0.4288  | <a href="#">SGGNEVSIEERLGMADIDTHKK</a> |
| 30.4  | 2401.3953 | 0.1879  | <a href="#">MNATKFLVLLVIGVLCIAVTAR</a> |
| 29.5  | 2401.2022 | 0.3810  | <a href="#">LADELDMVGVVVEHGLFNGMVK</a> |
| 28.4  | 2401.1253 | 0.4579  | <a href="#">DMEIAELKKNIEQMDTDHK</a>    |
| 26.6  | 2401.1981 | 0.3850  | <a href="#">GMTMPGHLGSEKTTVQNLEIVK</a> |
| 25.8  | 2402.1358 | -0.5527 | <a href="#">MPGNPYSSNEPGIGPLMRDIK</a>  |
| 24.4  | 2401.2965 | 0.2867  | <a href="#">RAVEEVFNKVESVNTINGLQK</a>  |
| 24.1  | 2400.3273 | 1.2559  | <a href="#">LMLLLDTPSRDVFILPALR</a>    |

**MASCOT** **SCIENCE** Mascot Search Results

**Peptide View**

MS/MS Fragmentation of **KPVQLPGAYK**  
 Found in **YD\_RFP-BARD-BRCA-Ub**, YD\_RFP-BARD-BRCA-Ub

Match to Query 299: 1214.849448 from(608.432000,2+) intensity(258859.0000)  
 Title: Cmpd 32, +MSn(608.85), 20.4 min  
 Data file C:\YaelDavid\100203\_YaelDavid\BIT00810\_YD\_3\_merge.mgf

Click mouse within plot area to zoom in by factor of two about that point

Or, Plot from 200 to 1400 Da Full range

Label all possible matches  Label matches used for scoring

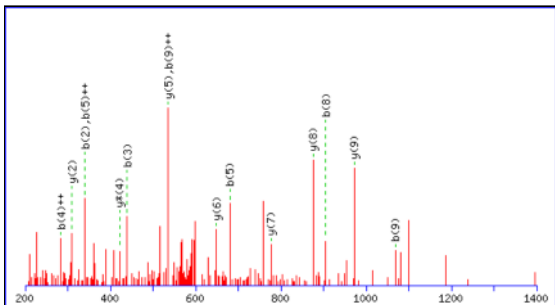

Monoisotopic mass of neutral peptide Mr(calc): 1213.6819  
 Fixed modifications: Carbamidomethyl (C) (apply to specified residues or termini only)  
 Variable modifications:  
 K1 : GlyGly (K)  
 Ions Score: 46 Expect: 0.048  
 Matches : 15/72 fragment ions using 19 most intense peaks ([help](#))

| #  | b                | b <sup>++</sup> | b*        | b <sup>*++</sup> | Seq. | y               | y <sup>++</sup> | y*              | y <sup>*++</sup> | #  |
|----|------------------|-----------------|-----------|------------------|------|-----------------|-----------------|-----------------|------------------|----|
| 1  | 243.1452         | 122.0762        | 226.1186  | 113.5629         | K    |                 |                 |                 |                  | 10 |
| 2  | <b>340.1979</b>  | 170.6026        | 323.1714  | 162.0893         | P    | <b>972.5513</b> | 486.7793        | 955.5247        | 478.2660         | 9  |
| 3  | <b>439.2663</b>  | 220.1368        | 422.2398  | 211.6235         | V    | <b>875.4985</b> | 438.2529        | 858.4720        | 429.7396         | 8  |
| 4  | 567.3249         | <b>284.1661</b> | 550.2984  | 275.6528         | Q    | <b>776.4301</b> | 388.7187        | 759.4036        | 380.2054         | 7  |
| 5  | <b>680.4090</b>  | <b>340.7081</b> | 663.3824  | 332.1949         | L    | <b>648.3715</b> | 324.6894        | 631.3450        | 316.1761         | 6  |
| 6  | 777.4618         | 389.2345        | 760.4352  | 380.7212         | P    | <b>535.2875</b> | 268.1474        | 518.2609        | 259.6341         | 5  |
| 7  | 834.4832         | 417.7452        | 817.4567  | 409.2320         | G    | 438.2347        | 219.6210        | <b>421.2082</b> | 211.1077         | 4  |
| 8  | <b>905.5203</b>  | 453.2638        | 888.4938  | 444.7505         | A    | 381.2132        | 191.1103        | 364.1867        | 182.5970         | 3  |
| 9  | <b>1068.5837</b> | <b>534.7955</b> | 1051.5571 | 526.2822         | Y    | <b>310.1761</b> | 155.5917        | 293.1496        | 147.0784         | 2  |
| 10 |                  |                 |           |                  | K    | 147.1128        | 74.0600         | 130.0863        | 65.5468          | 1  |

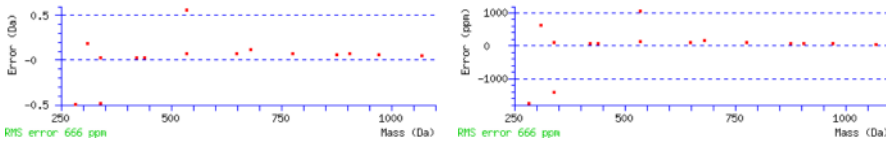

NCBI BLAST search of **KPVQLPGAYK**  
 (Parameters: blastp, nr protein database, expect=20000, no filter, PAM30)  
 Other BLAST [web gateways](#)

**All matches to this query**

| Score | Mr(calc): | Delta  | Sequence                     |
|-------|-----------|--------|------------------------------|
| 46.1  | 1213.6819 | 1.1676 | <a href="#">KPVQLPGAYK</a>   |
| 30.7  | 1213.5615 | 1.2879 | <a href="#">NFDITGLQEYK</a>  |
| 20.4  | 1213.6203 | 1.2291 | <a href="#">KNHPGKEYK</a>    |
| 18.4  | 1213.6125 | 1.2369 | <a href="#">VTTHQLQEMK</a>   |
| 17.3  | 1214.5311 | 0.3183 | <a href="#">MDECIEKYK</a>    |
| 16.6  | 1213.7394 | 1.1101 | <a href="#">LHVNNSSVKK</a>   |
| 16.6  | 1212.7230 | 2.1264 | <a href="#">QLPLNLFQIK</a>   |
| 15.7  | 1213.6091 | 1.2403 | <a href="#">KEGIHPEYK</a>    |
| 14.8  | 1213.6495 | 1.1999 | <a href="#">FYKLDWVK</a>     |
| 14.6  | 1214.7023 | 0.1472 | <a href="#">IPAVAGGIYNIK</a> |

Mascot: <http://www.matrixscience.com/>

**(MATRIX) (SCIENCE) Mascot Search Results**

**Peptide View**

MS/MS Fragmentation of **LIFAGKQLEDGR**

Found in **YD\_RFP-BARD-BRCA-Ub**, YD\_RFP-BARD-BRCA-Ub

Match to Query 435: 1459.903448 from (730.959000,2+) intensity(727233.0000)

Title: Cmpd 76, +MSn(731.36), 24.5 min

Data file C:\YaelDavid\100203\_YaelDavid\BIT00810\_YD\_3\_merge.mgf

Click mouse within plot area to zoom in by factor of two about that point

Or, Plot from 200 to 1300 Da Full range

Label all possible matches  Label matches used for scoring

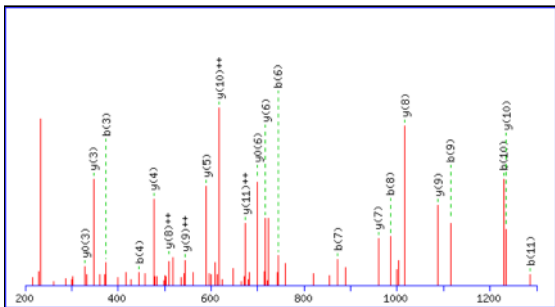

Monoisotopic mass of neutral peptide Mr(calc): 1459.7783

Fixed modifications: Carbamidomethyl (C) (apply to specified residues or termini only)

Variable modifications:

K6 : GlyGly (K)

Ions Score: 72 Expect: 0.00018

Matches : 22/102 Fragment ions using 30 most intense peaks [\(help\)](#)

| #  | b         | b <sup>++</sup> | b*        | b <sup>*++</sup> | b <sup>0</sup> | b <sup>0++</sup> | Seq. | y         | y <sup>++</sup> | y*        | y <sup>*++</sup> | y <sup>0</sup> | y <sup>0++</sup> | #  |
|----|-----------|-----------------|-----------|------------------|----------------|------------------|------|-----------|-----------------|-----------|------------------|----------------|------------------|----|
| 1  | 114.0913  | 57.5493         |           |                  |                |                  | L    |           |                 |           |                  |                |                  | 12 |
| 2  | 227.1754  | 114.0913        |           |                  |                |                  | I    | 1347.7015 | 674.3544        | 1330.6750 | 665.8411         | 1329.6910      | 665.3491         | 11 |
| 3  | 374.2438  | 187.6255        |           |                  |                |                  | F    | 1234.6175 | 617.8124        | 1217.5909 | 609.2991         | 1216.6069      | 608.8071         | 10 |
| 4  | 445.2809  | 223.1441        |           |                  |                |                  | A    | 1087.5491 | 544.2782        | 1070.5225 | 535.7649         | 1069.5385      | 535.2729         | 9  |
| 5  | 502.3024  | 251.6548        |           |                  |                |                  | G    | 1016.5119 | 508.7596        | 999.4854  | 500.2463         | 998.5014       | 499.7543         | 8  |
| 6  | 744.4403  | 372.7238        | 727.4137  | 364.2105         |                |                  | K    | 959.4905  | 480.2489        | 942.4639  | 471.7356         | 941.4799       | 471.2436         | 7  |
| 7  | 872.4989  | 436.7531        | 855.4723  | 428.2398         |                |                  | Q    | 717.3526  | 359.1799        | 700.3260  | 350.6667         | 699.3420       | 350.1747         | 6  |
| 8  | 985.5829  | 493.2951        | 968.5564  | 484.7818         |                |                  | L    | 589.2940  | 295.1506        | 572.2675  | 286.6374         | 571.2835       | 286.1454         | 5  |
| 9  | 1114.6255 | 557.8164        | 1097.5990 | 549.3031         | 1096.6150      | 548.8111         | E    | 476.2100  | 238.6086        | 459.1834  | 230.0953         | 458.1994       | 229.6033         | 4  |
| 10 | 1229.6525 | 615.3299        | 1212.6259 | 606.8166         | 1211.6419      | 606.3246         | D    | 347.1674  | 174.0873        | 330.1408  | 165.5740         | 329.1568       | 165.0820         | 3  |
| 11 | 1286.6739 | 643.8406        | 1269.6474 | 635.3273         | 1268.6634      | 634.8353         | G    | 232.1404  | 116.5738        | 215.1139  | 108.0606         |                |                  | 2  |
| 12 |           |                 |           |                  |                |                  | R    | 175.1190  | 88.0631         | 158.0924  | 79.5498          |                |                  | 1  |

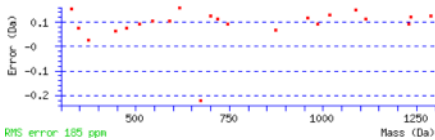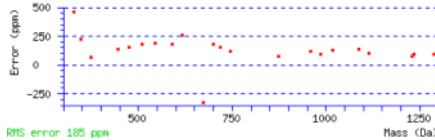

NCBI BLAST search of **LIFAGKQLEDGR**

(Parameters: blastp, nr protein database, expect=20000, no filter, PAM30)

Other BLAST [web gateways](#)

**All matches to this query**

| Score | Mr(calc): | Delta   | Sequence                       |
|-------|-----------|---------|--------------------------------|
| 71.8  | 1459.7783 | 0.1251  | <a href="#">LIFAGKQLEDGR</a>   |
| 30.9  | 1459.7718 | 0.1316  | <a href="#">HGGGMPYVGAFGRR</a> |
| 26.8  | 1460.7987 | -0.8953 | <a href="#">AGVFKKVDEIK</a>    |
| 26.8  | 1460.7987 | -0.8953 | <a href="#">AGVFKKVDELK</a>    |
| 23.8  | 1459.6725 | 0.2309  | <a href="#">EAAALQCQLEDGR</a>  |
| 22.9  | 1459.8293 | 0.0742  | <a href="#">LTRMIRTAGALK</a>   |
| 22.8  | 1459.7704 | 0.1330  | <a href="#">EMKLLFQSGALK</a>   |
| 20.8  | 1459.8432 | 0.0602  | <a href="#">SGMVTLKLEKIK</a>   |
| 20.3  | 1459.7453 | 0.1582  | <a href="#">KMAQFEKLIK</a>     |
| 20.0  | 1459.7817 | 0.1218  | <a href="#">LLATGMERAGIAK</a>  |

Mascot: <http://www.matrixscience.com/>







|           |          |           |           |         |   |                        |            |                 |
|-----------|----------|-----------|-----------|---------|---|------------------------|------------|-----------------|
| 495 - 506 | 487.3380 | 1458.9922 | 1459.7783 | -0.7861 | 1 | R.LIFAGKQLEDGR.T       | GlyGly (K) | (Ions score 22) |
| 495 - 506 | 487.3660 | 1459.0762 | 1459.7783 | -0.7021 | 1 | R.LIFAGKQLEDGR.T       | GlyGly (K) | (Ions score 31) |
| 495 - 506 | 487.6450 | 1459.9132 | 1459.7783 | 0.1349  | 1 | R.LIFAGKQLEDGR.T       | GlyGly (K) | (Ions score 32) |
| 495 - 506 | 730.9740 | 1459.9334 | 1459.7783 | 0.1551  | 1 | R.LIFAGKQLEDGR.T       | GlyGly (K) | (Ions score 72) |
| 495 - 506 | 730.9960 | 1459.9774 | 1459.7783 | 0.1991  | 1 | R.LIFAGKQLEDGR.T       | GlyGly (K) | (Ions score 71) |
| 495 - 506 | 731.0060 | 1459.9974 | 1459.7783 | 0.2191  | 1 | R.LIFAGKQLEDGR.T       | GlyGly (K) | (Ions score 71) |
| 495 - 506 | 731.0370 | 1460.0594 | 1459.7783 | 0.2811  | 1 | R.LIFAGKQLEDGR.T       | GlyGly (K) | (Ions score 71) |
| 495 - 506 | 487.7080 | 1460.1022 | 1459.7783 | 0.3239  | 1 | R.LIFAGKQLEDGR.T       | GlyGly (K) | (Ions score 31) |
| 507 - 515 | 541.3020 | 1080.5894 | 1080.5451 | 0.0443  | 0 | R.TLSDYNIQK.E          |            | (Ions score 54) |
| 507 - 515 | 541.3300 | 1080.6454 | 1080.5451 | 0.1003  | 0 | R.TLSDYNIQK.E          |            | (Ions score 52) |
| 507 - 515 | 541.3520 | 1080.6894 | 1080.5451 | 0.1443  | 0 | R.TLSDYNIQK.E          |            | (Ions score 57) |
| 507 - 515 | 541.3780 | 1080.7414 | 1080.5451 | 0.1963  | 0 | R.TLSDYNIQK.E          |            | (Ions score 51) |
| 507 - 515 | 541.3960 | 1080.7774 | 1080.5451 | 0.2323  | 0 | R.TLSDYNIQK.E          |            | (Ions score 60) |
| 507 - 515 | 541.3970 | 1080.7794 | 1080.5451 | 0.2343  | 0 | R.TLSDYNIQK.E          |            | (Ions score 41) |
| 507 - 515 | 541.3980 | 1080.7814 | 1080.5451 | 0.2363  | 0 | R.TLSDYNIQK.E          |            | (Ions score 48) |
| 507 - 515 | 541.4050 | 1080.7954 | 1080.5451 | 0.2503  | 0 | R.TLSDYNIQK.E          |            | (Ions score 37) |
| 507 - 515 | 541.4110 | 1080.8074 | 1080.5451 | 0.2623  | 0 | R.TLSDYNIQK.E          |            | (Ions score 38) |
| 507 - 515 | 541.4170 | 1080.8194 | 1080.5451 | 0.2743  | 0 | R.TLSDYNIQK.E          |            | (Ions score 15) |
| 507 - 524 | 748.8460 | 2243.5162 | 2243.1910 | 0.3252  | 1 | R.TLSDYNIQKESTLHLVLR.L | GlyGly (K) | (Ions score 72) |
| 507 - 524 | 749.2290 | 2244.6652 | 2243.1910 | 1.4742  | 1 | R.TLSDYNIQKESTLHLVLR.L | GlyGly (K) | (Ions score 65) |
| 516 - 524 | 533.9630 | 1065.9114 | 1066.6135 | -0.7020 | 0 | K.ESTLHLVLR.L          |            | (Ions score 61) |
| 516 - 524 | 534.3790 | 1066.7434 | 1066.6135 | 0.1300  | 0 | K.ESTLHLVLR.L          |            | (Ions score 55) |
| 516 - 524 | 534.3890 | 1066.7634 | 1066.6135 | 0.1500  | 0 | K.ESTLHLVLR.L          |            | (Ions score 22) |
| 516 - 524 | 534.4020 | 1066.7894 | 1066.6135 | 0.1760  | 0 | K.ESTLHLVLR.L          |            | (Ions score 61) |
| 516 - 524 | 534.4070 | 1066.7994 | 1066.6135 | 0.1860  | 0 | K.ESTLHLVLR.L          |            | (Ions score 53) |
| 516 - 524 | 534.4100 | 1066.8054 | 1066.6135 | 0.1920  | 0 | K.ESTLHLVLR.L          |            | (Ions score 57) |
| 516 - 524 | 534.4230 | 1066.8314 | 1066.6135 | 0.2180  | 0 | K.ESTLHLVLR.L          |            | (Ions score 65) |
| 516 - 524 | 534.4440 | 1066.8734 | 1066.6135 | 0.2600  | 0 | K.ESTLHLVLR.L          |            | (Ions score 37) |
| 516 - 524 | 534.4600 | 1066.9054 | 1066.6135 | 0.2920  | 0 | K.ESTLHLVLR.L          |            | (Ions score 40) |
| 516 - 524 | 534.4650 | 1066.9154 | 1066.6135 | 0.3020  | 0 | K.ESTLHLVLR.L          |            | (Ions score 44) |
| 516 - 524 | 534.4670 | 1066.9194 | 1066.6135 | 0.3060  | 0 | K.ESTLHLVLR.L          |            | (Ions score 55) |
| 516 - 524 | 534.4680 | 1066.9214 | 1066.6135 | 0.3080  | 0 | K.ESTLHLVLR.L          |            | (Ions score 37) |

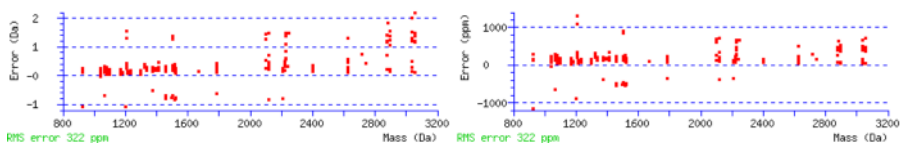

Mascot: <http://www.matrixscience.com/>

**(MATRIX SCIENCE) Mascot Search Results**

**Peptide View**

MS/MS Fragmentation of **TLTGKTITLEVEPSDTIENVK**  
 Found in **YD\_RFP-BARD-BRCA-Ub**, YD\_RFP-BARD-BRCA-Ub

Match to Query 826: 2401.460172 from(801.494000,3+) intensity(1539442.0000)  
 Title: Cmpd 105, +MSn(802.06), 27.2 min  
 Data file C:\YaelDavid\100203\_YaelDavid\BIT00812\_YD\_4\_merge.mgf

Click mouse within plot area to zoom in by factor of two about that point  
 Or, Plot from 200 to 1500 Da Full range  
 Label all possible matches  Label matches used for scoring

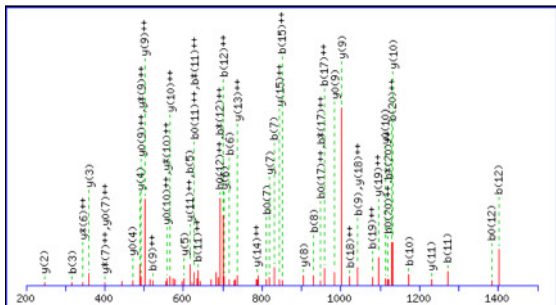

Monoisotopic mass of neutral peptide Mr(calc): 2401.2588  
 Fixed modifications: Carbamidomethyl (C) (apply to specified residues or termini only)  
 Variable modifications:  
 K5 : GlyGly (K)  
 Ions Score: 101 Expect: 4.5e-07  
 Matches : 55/226 fragment ions using 57 most intense peaks ([help](#))

| #  | b                | b <sup>++</sup>  | b <sup>*</sup> | b <sup>*++</sup> | b <sup>0</sup>   | b <sup>0++</sup> | Seq. | y                | y <sup>++</sup>  | y <sup>*</sup> | y <sup>*++</sup> | y <sup>0</sup>   | y <sup>0++</sup> | #  |
|----|------------------|------------------|----------------|------------------|------------------|------------------|------|------------------|------------------|----------------|------------------|------------------|------------------|----|
| 1  | 102.0550         | 51.5311          |                |                  | 84.0444          | 42.5258          | T    |                  |                  |                |                  |                  |                  | 21 |
| 2  | 215.1390         | 108.0731         |                |                  | 197.1285         | 99.0679          | L    | 2301.2184        | 1151.1128        | 2284.1918      | 1142.5996        | 2283.2078        | 1142.1076        | 20 |
| 3  | <b>316.1867</b>  | 158.5970         |                |                  | 298.1761         | 149.5917         | T    | 2188.1343        | <b>1094.5708</b> | 2171.1078      | 1086.0575        | 2170.1238        | 1085.5655        | 19 |
| 4  | 373.2082         | 187.1077         |                |                  | 355.1976         | 178.1024         | G    | 2087.0867        | <b>1044.0470</b> | 2070.0601      | 1035.5337        | 2069.0761        | 1035.0417        | 18 |
| 5  | <b>615.3461</b>  | 308.1767         | 598.3195       | 299.6634         | 597.3355         | 299.1714         | K    | 2030.0652        | 1015.5362        | 2013.0386      | 1007.0230        | 2012.0546        | 1006.5310        | 17 |
| 6  | <b>716.3937</b>  | 358.7005         | 699.3672       | 350.1872         | 698.3832         | 349.6952         | T    | 1787.9273        | 894.4673         | 1770.9008      | 885.9540         | 1769.9167        | 885.4620         | 16 |
| 7  | <b>829.4778</b>  | 415.2425         | 812.4512       | 406.7293         | <b>811.4672</b>  | 406.2373         | I    | 1686.8796        | <b>843.9434</b>  | 1669.8531      | 835.4302         | 1668.8691        | 834.9382         | 15 |
| 8  | <b>930.5255</b>  | 465.7664         | 913.4989       | 457.2531         | 912.5149         | 456.7611         | T    | 1573.7956        | <b>787.4014</b>  | 1556.7690      | 778.8881         | 1555.7850        | 778.3961         | 14 |
| 9  | <b>1043.6095</b> | <b>522.3084</b>  | 1026.5830      | 513.7951         | 1025.5990        | 513.3031         | L    | 1472.7479        | <b>736.8776</b>  | 1455.7213      | 728.3643         | 1454.7373        | 727.8723         | 13 |
| 10 | <b>1172.6521</b> | 586.8297         | 1155.6256      | 578.3164         | 1154.6416        | 577.8244         | E    | 1359.6638        | 680.3355         | 1342.6373      | 671.8223         | 1341.6533        | 671.3303         | 12 |
| 11 | <b>1271.7205</b> | <b>636.3639</b>  | 1254.6940      | <b>627.8506</b>  | 1253.7100        | <b>627.3586</b>  | V    | <b>1230.6212</b> | <b>615.8142</b>  | 1213.5947      | 607.3010         | 1212.6107        | 606.8090         | 11 |
| 12 | <b>1400.7631</b> | <b>700.8852</b>  | 1383.7366      | <b>692.3719</b>  | <b>1382.7526</b> | <b>691.8799</b>  | E    | <b>1131.5528</b> | <b>566.2800</b>  | 1114.5263      | <b>557.7668</b>  | <b>1113.5422</b> | <b>557.2748</b>  | 10 |
| 13 | 1497.8159        | 749.4116         | 1480.7894      | 740.8983         | 1479.8053        | 740.4063         | P    | <b>1002.5102</b> | <b>501.7587</b>  | 985.4837       | <b>493.2455</b>  | <b>984.4997</b>  | <b>492.7535</b>  | 9  |
| 14 | 1584.8479        | 792.9276         | 1567.8214      | 784.4143         | 1566.8374        | 783.9223         | S    | <b>905.4575</b>  | 453.2324         | 888.4309       | 444.7191         | 887.4469         | 444.2271         | 8  |
| 15 | 1699.8749        | <b>850.4411</b>  | 1682.8483      | 841.9278         | 1681.8643        | 841.4358         | D    | <b>818.4254</b>  | 409.7163         | 801.3989       | <b>401.2031</b>  | 800.4149         | <b>400.7111</b>  | 7  |
| 16 | 1800.9226        | 900.9649         | 1783.8960      | 892.4516         | 1782.9120        | 891.9596         | T    | <b>703.3985</b>  | 352.2029         | 686.3719       | <b>343.6896</b>  | 685.3879         | 343.1976         | 6  |
| 17 | 1914.0066        | <b>957.5069</b>  | 1896.9801      | <b>948.9937</b>  | 1895.9961        | <b>948.5017</b>  | I    | <b>602.3508</b>  | 301.6790         | 585.3243       | 293.1658         | 584.3402         | 292.6738         | 5  |
| 18 | 2043.0492        | <b>1022.0282</b> | 2026.0227      | 1013.5150        | 2025.0386        | 1013.0230        | E    | <b>489.2667</b>  | 245.1370         | 472.2402       | 236.6237         | <b>471.2562</b>  | 236.1317         | 4  |
| 19 | 2157.0921        | <b>1079.0497</b> | 2140.0656      | 1070.5364        | 2139.0816        | 1070.0444        | N    | <b>360.2241</b>  | 180.6157         | 343.1976       | 172.1024         |                  |                  | 3  |
| 20 | 2256.1605        | <b>1128.5839</b> | 2239.1340      | <b>1120.0706</b> | 2238.1500        | <b>1119.5786</b> | V    | <b>246.1812</b>  | 123.5942         | 229.1547       | 115.0810         |                  |                  | 2  |
| 21 |                  |                  |                |                  |                  |                  | K    | 147.1128         | 74.0600          | 130.0863       | 65.5468          |                  |                  | 1  |

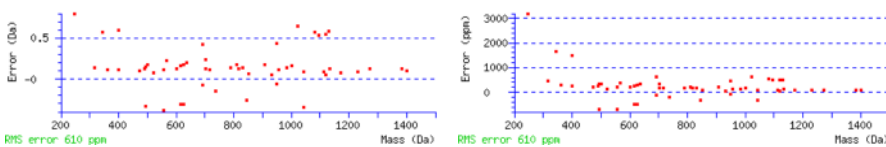

NCBI BLAST search of **TLTGKTITLEVEPSDTIENVK**  
 (Parameters: blastp, nr protein database, expect=20000, no filter, PAM30)  
 Other BLAST [web gateways](#)

**All matches to this query**

| Score | Mr(calc): | Delta   | Sequence                               |
|-------|-----------|---------|----------------------------------------|
| 101.3 | 2401.2588 | 0.2014  | <a href="#">TLTGKTITLEVEPSDTIENVK</a>  |
| 33.9  | 2402.2199 | -0.7597 | <a href="#">NVPRYGMGQTAPMVIKSPGEVK</a> |
| 32.9  | 2401.2410 | 0.2191  | <a href="#">DDMVPIDSKVKIVGDTEALVK</a>  |
| 31.9  | 2400.3273 | 1.1329  | <a href="#">LMMLLTSPSIRDVILFPALR</a>   |
| 28.4  | 2401.2965 | 0.1637  | <a href="#">RAVEEVFNKVESVNTINGLGK</a>  |
| 28.1  | 2401.1543 | 0.3058  | <a href="#">SGGNEVSIEERLGAMDDITHKK</a> |
| 27.8  | 2401.1981 | 0.2620  | <a href="#">GMTMPGHLGSEKTTVONLEIVK</a> |
| 25.5  | 2401.3953 | 0.0649  | <a href="#">MNAIKFLVLLVIGVLCIAVTAR</a> |
| 24.8  | 2401.3039 | 0.1563  | <a href="#">MKKIGSIEVPOEAFNLK</a>      |
| 24.6  | 2401.1253 | 0.3349  | <a href="#">DMEIAELKKNIEQMDTDHK</a>    |

**(MATRIX SCIENCE) Mascot Search Results**

**Peptide View**

MS/MS Fragmentation of **KPVQLPGAYK**  
 Found in **YD\_RFP-BARD-BRCA-Ub**, YD\_RFP-BARD-BRCA-Ub

Match to Query 336: 1213.745448 from(607.880000,2+) intensity(337498.0000)  
 Title: Cmpd 30\_+MSn(608.16), 20.5 min  
 Data file C:\YaelDavid\100203\_YaelDavid\BIT00812\_YD\_4\_merge.mgf

Click mouse within plot area to zoom in by factor of two about that point

Or, Plot from 200 to 1100 Da Full range

Label all possible matches  Label matches used for scoring

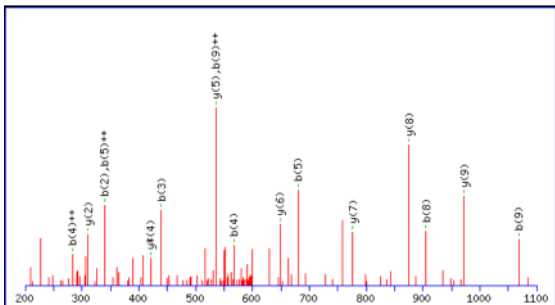

Monoisotopic mass of neutral peptide Mr(calc): 1213.6819  
 Fixed modifications: Carbamidomethyl (C) (apply to specified residues or termini only)  
 Variable modifications:  
 K1 : GlyGly (K)  
 Ions Score: 53 Expect: 0.031  
 Matches : 16/72 fragment ions using 18 most intense peaks (help)

| #  | b         | b <sup>++</sup> | b*        | b <sup>*++</sup> | Seq. | y        | y <sup>++</sup> | y*       | y <sup>*++</sup> | #  |
|----|-----------|-----------------|-----------|------------------|------|----------|-----------------|----------|------------------|----|
| 1  | 243.1452  | 122.0762        | 226.1186  | 113.5629         | K    |          |                 |          |                  | 10 |
| 2  | 340.1979  | 170.6026        | 323.1714  | 162.0893         | P    | 972.5513 | 486.7793        | 955.5247 | 478.2660         | 9  |
| 3  | 439.2663  | 220.1368        | 422.2398  | 211.6235         | V    | 875.4985 | 438.2529        | 858.4720 | 429.7396         | 8  |
| 4  | 567.3249  | 284.1661        | 550.2984  | 275.6528         | Q    | 776.4301 | 388.7187        | 759.4036 | 380.2054         | 7  |
| 5  | 680.4090  | 340.7081        | 663.3824  | 332.1949         | L    | 648.3715 | 324.6894        | 631.3450 | 316.1761         | 6  |
| 6  | 777.4618  | 389.2345        | 760.4352  | 380.7212         | P    | 535.2875 | 268.1474        | 518.2609 | 259.6341         | 5  |
| 7  | 834.4832  | 417.7452        | 817.4567  | 409.2320         | G    | 438.2347 | 219.6210        | 421.2082 | 211.1077         | 4  |
| 8  | 905.5203  | 453.2638        | 888.4938  | 444.7505         | A    | 381.2132 | 191.1103        | 364.1867 | 182.5970         | 3  |
| 9  | 1068.5837 | 534.7955        | 1051.5571 | 526.2822         | Y    | 310.1761 | 155.5917        | 293.1496 | 147.0784         | 2  |
| 10 |           |                 |           |                  | K    | 147.1128 | 74.0600         | 130.0863 | 65.5468          | 1  |

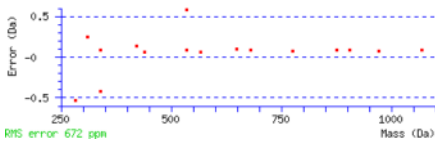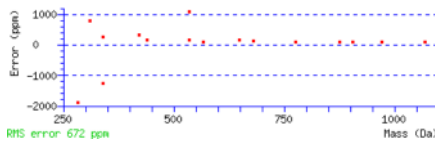

NCBI BLAST search of **KPVQLPGAYK**  
 (Parameters: blastp, nr protein database, expect=20000, no filter, PAM30)  
 Other BLAST [web gateways](#)

**All matches to this query**

| Score | Mr(calc): | Delta   | Sequence                    |
|-------|-----------|---------|-----------------------------|
| 53.3  | 1213.6819 | 0.0636  | <a href="#">KPVQLPGAYK</a>  |
| 35.7  | 1213.5615 | 0.1839  | <a href="#">NFDTGLQEYK</a>  |
| 24.9  | 1212.7230 | 1.0224  | <a href="#">QLPLNLFQIK</a>  |
| 22.9  | 1213.6203 | 0.1251  | <a href="#">KNHPGKEYK</a>   |
| 21.4  | 1214.5489 | -0.8035 | <a href="#">DETSMTPPPPK</a> |
| 20.5  | 1213.7434 | 0.0020  | <a href="#">LILVPFLNGTK</a> |
| 20.1  | 1213.6125 | 0.1329  | <a href="#">VTTHQLQEMK</a>  |
| 19.6  | 1213.5649 | 0.1806  | <a href="#">AYGMAGLETSK</a> |
| 19.4  | 1214.5311 | -0.7857 | <a href="#">MDECIEKYK</a>   |
| 19.4  | 1213.7407 | 0.0047  | <a href="#">KPIPKHPRK</a>   |

**MASCOT** **SCIENCE** Mascot Search Results

Peptide View

MS/MS Fragmentation of **KPVQLPGAYKTDIK**  
 Found in **YD\_RFP-BARD-BRCA-Ub**, YD\_RFP-BARD-BRCA-Ub

Match to Query 581: 1671.083172 from(558.035000,3+) intensity(390351.0000)  
 Title: Cmpd 45\_+MSn(558.37), 21.2 min  
 Data file C:\YaelDavid\100203\_YaelDavid\BIT00812\_YD\_4\_merge.mgf

Click mouse within plot area to zoom in by factor of two about that point

Or, Plot from 200 to 1150 Da Full range

Label all possible matches  Label matches used for scoring

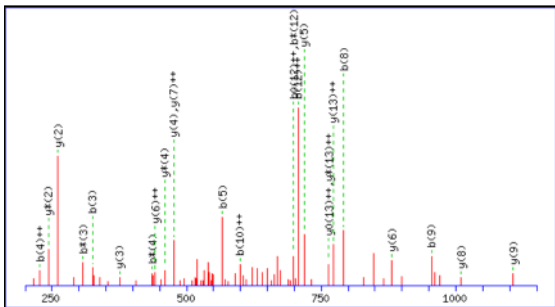

Monoisotopic mass of neutral peptide **Mr(calc)**: 1670.9355  
**Fixed modifications**: Carbamidomethyl (C) (apply to specified residues or termini only)  
**Variable modifications**:  
 K10 : GlyGly (K)  
**Ions Score**: 42 **Expect**: 0.01  
**Matches** : 26/132 fragment ions using 33 most intense peaks ([help](#))

| #  | b         | b <sup>++</sup> | b <sup>*</sup> | b <sup>*++</sup> | b <sup>0</sup> | b <sup>0++</sup> | Seq. | y         | y <sup>++</sup> | y <sup>*</sup> | y <sup>*++</sup> | y <sup>0</sup> | y <sup>0++</sup> | #  |
|----|-----------|-----------------|----------------|------------------|----------------|------------------|------|-----------|-----------------|----------------|------------------|----------------|------------------|----|
| 1  | 129.1022  | 65.0548         | 112.0757       | 56.5415          |                |                  | K    |           |                 |                |                  |                |                  | 14 |
| 2  | 226.1550  | 113.5811        | 209.1285       | 105.0679         |                |                  | P    | 1543.8479 | 772.4276        | 1526.8213      | 763.9143         | 1525.8373      | 763.4223         | 13 |
| 3  | 325.2234  | 163.1153        | 308.1969       | 154.6021         |                |                  | V    | 1446.7951 | 723.9012        | 1429.7686      | 715.3879         | 1428.7845      | 714.8959         | 12 |
| 4  | 453.2820  | 227.1446        | 436.2554       | 218.6314         |                |                  | Q    | 1347.7267 | 674.3670        | 1330.7001      | 665.8537         | 1329.7161      | 665.3617         | 11 |
| 5  | 566.3661  | 283.6867        | 549.3395       | 275.1734         |                |                  | L    | 1219.6681 | 610.3377        | 1202.6416      | 601.8244         | 1201.6576      | 601.3324         | 10 |
| 6  | 663.4188  | 332.2130        | 646.3923       | 323.6998         |                |                  | P    | 1106.5841 | 553.7957        | 1089.5575      | 545.2824         | 1088.5735      | 544.7904         | 9  |
| 7  | 720.4403  | 360.7238        | 703.4137       | 352.2105         |                |                  | G    | 1009.5313 | 505.2693        | 992.5047       | 496.7560         | 991.5207       | 496.2640         | 8  |
| 8  | 791.4774  | 396.2423        | 774.4509       | 387.7291         |                |                  | A    | 952.5098  | 476.7585        | 935.4833       | 468.2453         | 934.4993       | 467.7533         | 7  |
| 9  | 954.5407  | 477.7740        | 937.5142       | 469.2607         |                |                  | Y    | 881.4727  | 441.2400        | 864.4462       | 432.7267         | 863.4621       | 432.2347         | 6  |
| 10 | 1196.6786 | 598.8429        | 1179.6521      | 590.3297         |                |                  | K    | 718.4094  | 359.7083        | 701.3828       | 351.1951         | 700.3988       | 350.7030         | 5  |
| 11 | 1297.7263 | 649.3668        | 1280.6998      | 640.8535         | 1279.7157      | 640.3615         | T    | 476.2715  | 238.6394        | 459.2449       | 230.1261         | 458.2609       | 229.6341         | 4  |
| 12 | 1412.7532 | 706.8803        | 1395.7267      | 698.3670         | 1394.7427      | 697.8750         | D    | 375.2238  | 188.1155        | 358.1973       | 179.6023         | 357.2132       | 179.1103         | 3  |
| 13 | 1525.8373 | 763.4223        | 1508.8108      | 754.9090         | 1507.8267      | 754.4170         | I    | 260.1969  | 130.6021        | 243.1703       | 122.0888         |                |                  | 2  |
| 14 |           |                 |                |                  |                |                  | K    | 147.1128  | 74.0600         | 130.0863       | 65.5468          |                |                  | 1  |

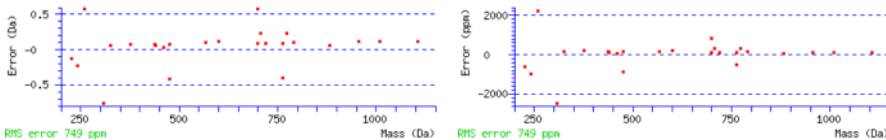

NCBI BLAST search of **KPVQLPGAYKTDIK**  
 (Parameters: blastp, nr protein database, expect=20000, no filter, PAM30)  
 Other BLAST [web gateways](#)

All matches to this query

| Score | Mr(calc): | Delta   | Sequence                         |
|-------|-----------|---------|----------------------------------|
| 42.1  | 1670.9355 | 0.1476  | <a href="#">KPVQLPGAYKTDIK</a>   |
| 26.9  | 1670.9355 | 0.1476  | <a href="#">KPVQLPGAYKTDIK</a>   |
| 20.5  | 1669.7837 | 1.2994  | <a href="#">SGITMTAGLMLGMNK</a>  |
| 19.4  | 1671.8679 | -0.7847 | <a href="#">QIQTLEIELESQK</a>    |
| 19.2  | 1671.8072 | -0.7241 | <a href="#">KLPHACESTQMLK</a>    |
| 18.8  | 1670.8951 | 0.1880  | <a href="#">VQVNVGDLEKSKK</a>    |
| 18.1  | 1671.9229 | -0.8398 | <a href="#">GDLISGIVVAVQMIK</a>  |
| 17.9  | 1671.7787 | -0.6955 | <a href="#">EMSKATAYHNDHLR</a>   |
| 17.8  | 1670.9315 | 0.1517  | <a href="#">KLIDQIETSLRK</a>     |
| 17.8  | 1671.8436 | -0.7604 | <a href="#">HNAMATAIAAKAMDIK</a> |

**(MATRIX) Mascot Search Results**

**Peptide View**

MS/MS Fragmentation of **TLTGKTITLEVEPSDTIENVKAK**  
 Found in **YD\_RFP-BARD-BRCA-Ub**, YD\_RFP-BARD-BRCA-Ub

Match to Query 854: 2715.194172 from(906.072000,3+) intensity(386680.0000)  
 Title: Cmpd 92\_+MSn(906.44), 25.9 min  
 Data file C:\YaelDavid\100203\_YaelDavid\BIT00812\_YD\_4\_merge.mgf

Click mouse within plot area to zoom in by factor of two about that point  
 Or, Plot from 200 to 2600 Da Full range  
 Label all possible matches  Label matches used for scoring

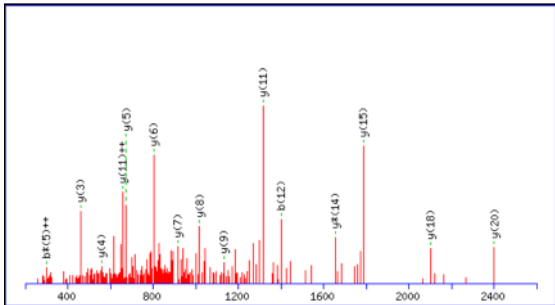

Monoisotopic mass of neutral peptide Mr(calc): 2714.4338  
 Fixed modifications: Carbamidomethyl (C) (apply to specified residues or termini only)  
 Variable modifications:  
 K5 : GlyGly (K)  
 K23 : GlyGly (K)  
 Ions Score: 71 Expect: 2.1e-05  
 Matches : 15/246 Fragment ions using 20 most intense peaks ([help](#))

| #  | b                | b <sup>++</sup> | b*        | b <sup>*++</sup> | b <sup>0</sup> | b <sup>0++</sup> | Seq. | y                | y <sup>++</sup> | y*               | y <sup>*++</sup> | y <sup>0</sup> | y <sup>0++</sup> | #  |
|----|------------------|-----------------|-----------|------------------|----------------|------------------|------|------------------|-----------------|------------------|------------------|----------------|------------------|----|
| 1  | 102.0550         | 51.5311         |           |                  | 84.0444        | 42.5258          | T    |                  |                 |                  |                  |                |                  | 23 |
| 2  | 215.1390         | 108.0731        |           |                  | 197.1285       | 99.0679          | L    | 2614.3934        | 1307.7003       | 2597.3669        | 1299.1871        | 2596.3828      | 1298.6951        | 22 |
| 3  | 316.1867         | 158.5970        |           |                  | 298.1761       | 149.5917         | T    | 2501.3093        | 1251.1583       | 2484.2828        | 1242.6450        | 2483.2988      | 1242.1530        | 21 |
| 4  | 373.2082         | 187.1077        |           |                  | 355.1976       | 178.1024         | G    | <b>2400.2617</b> | 1200.6345       | 2383.2351        | 1192.1212        | 2382.2511      | 1191.6292        | 20 |
| 5  | 615.3461         | 308.1767        | 598.3195  | <b>299.6634</b>  | 597.3355       | 299.1714         | K    | 2343.2402        | 1172.1237       | 2326.2136        | 1163.6105        | 2325.2296      | 1163.1185        | 19 |
| 6  | 716.3937         | 358.7005        | 699.3672  | 350.1872         | 698.3832       | 349.6952         | T    | <b>2101.1023</b> | 1051.0548       | 2084.0758        | 1042.5415        | 2083.0917      | 1042.0495        | 18 |
| 7  | 829.4778         | 415.2425        | 812.4512  | 406.7293         | 811.4672       | 406.2373         | I    | 2000.0546        | 1000.5310       | 1983.0281        | 992.0177         | 1982.0441      | 991.5257         | 17 |
| 8  | 930.5255         | 465.7664        | 913.4989  | 457.2531         | 912.5149       | 456.7611         | T    | 1886.9706        | 943.9889        | 1869.9440        | 935.4756         | 1868.9600      | 934.9836         | 16 |
| 9  | 1043.6095        | 522.3084        | 1026.5830 | 513.7951         | 1025.5990      | 513.3031         | L    | <b>1785.9229</b> | 893.4651        | 1768.8963        | 884.9518         | 1767.9123      | 884.4598         | 15 |
| 10 | 1172.6521        | 586.8297        | 1155.6256 | 578.3164         | 1154.6416      | 577.8244         | E    | 1672.8388        | 836.9230        | <b>1655.8123</b> | 828.4098         | 1654.8283      | 827.9178         | 14 |
| 11 | 1271.7205        | 636.3639        | 1254.6940 | 627.8506         | 1253.7100      | 627.3586         | V    | 1543.7962        | 772.4018        | 1526.7697        | 763.8885         | 1525.7857      | 763.3965         | 13 |
| 12 | <b>1400.7631</b> | 700.8852        | 1383.7366 | 692.3719         | 1382.7526      | 691.8799         | E    | 1444.7278        | 722.8675        | 1427.7013        | 714.3543         | 1426.7172      | 713.8623         | 12 |
| 13 | 1497.8159        | 749.4116        | 1480.7894 | 740.8983         | 1479.8053      | 740.4063         | P    | <b>1315.6852</b> | <b>658.3462</b> | 1298.6587        | 649.8330         | 1297.6747      | 649.3410         | 11 |
| 14 | 1584.8479        | 792.9276        | 1567.8214 | 784.4143         | 1566.8374      | 783.9223         | S    | 1218.6325        | 609.8199        | 1201.6059        | 601.3066         | 1200.6219      | 600.8146         | 10 |
| 15 | 1699.8749        | 850.4411        | 1682.8483 | 841.9278         | 1681.8643      | 841.4358         | D    | <b>1131.6004</b> | 566.3039        | 1114.5739        | 557.7906         | 1113.5899      | 557.2986         | 9  |
| 16 | 1800.9226        | 900.9649        | 1783.8960 | 892.4516         | 1782.9120      | 891.9596         | T    | <b>1016.5735</b> | 508.7904        | 999.5469         | 500.2771         | 998.5629       | 499.7851         | 8  |
| 17 | 1914.0066        | 957.5069        | 1896.9801 | 948.9937         | 1895.9961      | 948.5017         | I    | <b>915.5258</b>  | 458.2665        | 898.4993         | 449.7533         | 897.5152       | 449.2613         | 7  |
| 18 | 2043.0492        | 1022.0282       | 2026.0227 | 1013.5150        | 2025.0386      | 1013.0230        | E    | <b>802.4417</b>  | 401.7245        | 785.4152         | 393.2112         | 784.4312       | 392.7192         | 6  |
| 19 | 2157.0921        | 1079.0497       | 2140.0656 | 1070.5364        | 2139.0816      | 1070.0444        | N    | <b>673.3991</b>  | 337.2032        | 656.3726         | 328.6899         |                |                  | 5  |
| 20 | 2256.1605        | 1128.5839       | 2239.1340 | 1120.0706        | 2238.1500      | 1119.5786        | V    | <b>559.3562</b>  | 280.1817        | 542.3297         | 271.6685         |                |                  | 4  |
| 21 | 2384.2555        | 1192.6314       | 2367.2290 | 1184.1181        | 2366.2449      | 1183.6261        | K    | <b>460.2878</b>  | 230.6475        | 443.2613         | 222.1343         |                |                  | 3  |
| 22 | 2455.2926        | 1228.1500       | 2438.2661 | 1219.6367        | 2437.2821      | 1219.1447        | A    | 332.1928         | 166.6001        | 315.1663         | 158.0868         |                |                  | 2  |
| 23 |                  |                 |           |                  |                |                  | K    | 261.1557         | 131.0815        | 244.1292         | 122.5682         |                |                  | 1  |

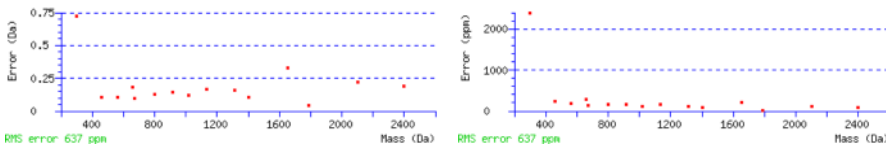

NCBI BLAST search of **TLTGKTITLEVEPSDTIENVKAK**  
 (Parameters: blastp, nr protein database, expect=20000, no filter, PAM30)  
 Other BLAST [web gateways](#)

**All matches to this query**

| Score | Mr(calc): | Delta   | Sequence                                     |
|-------|-----------|---------|----------------------------------------------|
| 70.7  | 2714.4338 | 0.7604  | <a href="#">TLTGKTITLEVEPSDTIENVKAK</a>      |
| 70.7  | 2714.4338 | 0.7604  | <a href="#">TLTGKTITLEVEPSDTIENVKAK</a>      |
| 19.9  | 2714.2494 | 0.9448  | <a href="#">AQSEITGEVKGHYLNATGGTVEEMYK</a>   |
| 15.9  | 2714.4175 | 0.7767  | <a href="#">KVYNIPGISPDMMKLIIEYAYTR</a>      |
| 15.8  | 2715.1314 | 0.0628  | <a href="#">MDEADPGEAEAAQAEAAQDGAAGDGAAR</a> |
| 14.3  | 2713.3303 | 1.8639  | <a href="#">EANMLNIPVYVAMIDTANPNPDVVDVK</a>  |
| 13.9  | 2716.3012 | -1.1070 | <a href="#">NSTEQSGVNVNGNVLAAASNVNSSVK</a>   |
| 12.8  | 2714.3302 | 0.8640  | <a href="#">IKVCEMLLHECELOSQKLGR</a>         |
| 11.8  | 2715.2666 | -0.0724 | <a href="#">SMGPDGLKEVTENAVLNANYMMRK</a>     |
| 11.4  | 2713.2912 | 1.9030  | <a href="#">AANGINSSGOQNSSTRFMQMLTK</a>      |

Mascot: <http://www.matrixscience.com/>



**(MATRIX) (SCIENCE) Mascot Search Results**

**Peptide View**

MS/MS Fragmentation of **TITLEVEPSDTIENVKAK**  
 Found in **YD\_RFP-p53-Ub**, YD\_RFP-p53-Ub

Match to Query 710: 2100.347448 from(1051.181000,2+) intensity(303915.0000)  
 Title: Cmpd 86, +MSn(1051.60), 26.4 min  
 Data file C:\YaelDavid\100203\_YaelDavid\BIT00812\_YD\_4\_merge.mgf

Click mouse within plot area to zoom in by factor of two about that point

Or, Plot from 300 to 1700 Da Full range

Label all possible matches  Label matches used for scoring

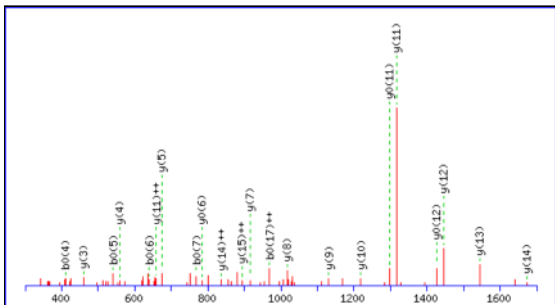

Monoisotopic mass of neutral peptide **Mr(calc)**: 2100.0950  
**Fixed modifications**: Carbamidomethyl (C) (apply to specified residues or termini only)  
**Variable modifications**:  
 K16 : GlyGly (K)  
**Ions Score**: 48 **Expect**: 0.0056  
**Matches** : 22/168 fragment ions using 48 most intense peaks ([help](#))

| #  | b         | b <sup>++</sup> | b*        | b <sup>*++</sup> | b <sup>0</sup> | b <sup>0++</sup> | Seq. | y         | y <sup>++</sup> | y*        | y <sup>*++</sup> | y <sup>0</sup> | y <sup>0++</sup> | #  |
|----|-----------|-----------------|-----------|------------------|----------------|------------------|------|-----------|-----------------|-----------|------------------|----------------|------------------|----|
| 1  | 102.0550  | 51.5311         |           |                  | 84.0444        | 42.5258          | T    |           |                 |           |                  |                |                  | 18 |
| 2  | 215.1390  | 108.0731        |           |                  | 197.1285       | 99.0679          | I    | 2000.0546 | 1000.5310       | 1983.0281 | 992.0177         | 1982.0441      | 991.5257         | 17 |
| 3  | 316.1867  | 158.5970        |           |                  | 298.1761       | 149.5917         | T    | 1886.9706 | 943.9889        | 1869.9440 | 935.4756         | 1868.9600      | 934.9836         | 16 |
| 4  | 429.2708  | 215.1390        |           |                  | 411.2602       | 206.1337         | L    | 1785.9229 | 893.4651        | 1768.8963 | 884.9518         | 1767.9123      | 884.4598         | 15 |
| 5  | 558.3134  | 279.6603        |           |                  | 540.3028       | 270.6550         | E    | 1672.8388 | 836.9230        | 1655.8123 | 828.4098         | 1654.8283      | 827.9178         | 14 |
| 6  | 657.3818  | 329.1945        |           |                  | 639.3712       | 320.1892         | V    | 1543.7962 | 772.4018        | 1526.7697 | 763.8885         | 1525.7857      | 763.3965         | 13 |
| 7  | 786.4244  | 393.7158        |           |                  | 768.4138       | 384.7105         | E    | 1444.7278 | 722.8675        | 1427.7013 | 714.3543         | 1426.7172      | 713.8623         | 12 |
| 8  | 883.4771  | 442.2422        |           |                  | 865.4666       | 433.2369         | P    | 1315.6852 | 658.3462        | 1298.6587 | 649.8330         | 1297.6747      | 649.3410         | 11 |
| 9  | 970.5092  | 485.7582        |           |                  | 952.4986       | 476.7529         | S    | 1218.6325 | 609.8199        | 1201.6059 | 601.3066         | 1200.6219      | 600.8146         | 10 |
| 10 | 1085.5361 | 543.2717        |           |                  | 1067.5255      | 534.2664         | D    | 1131.6004 | 566.3039        | 1114.5739 | 557.7906         | 1113.5899      | 557.2986         | 9  |
| 11 | 1186.5838 | 593.7955        |           |                  | 1168.5732      | 584.7902         | T    | 1016.5735 | 508.7904        | 999.5469  | 500.2771         | 998.5629       | 499.7851         | 8  |
| 12 | 1299.6678 | 650.3376        |           |                  | 1281.6573      | 641.3323         | I    | 915.5258  | 458.2665        | 898.4993  | 449.7533         | 897.5152       | 449.2613         | 7  |
| 13 | 1428.7104 | 714.8589        |           |                  | 1410.6999      | 705.8536         | E    | 802.4417  | 401.7245        | 785.4152  | 393.2112         | 784.4312       | 392.7192         | 6  |
| 14 | 1542.7534 | 771.8803        | 1525.7268 | 763.3670         | 1524.7428      | 762.8750         | N    | 673.3991  | 337.2032        | 656.3726  | 328.6899         |                |                  | 5  |
| 15 | 1641.8218 | 821.4145        | 1624.7952 | 812.9013         | 1623.8112      | 812.4092         | V    | 559.3562  | 280.1817        | 542.3297  | 271.6685         |                |                  | 4  |
| 16 | 1883.9597 | 942.4835        | 1866.9331 | 933.9702         | 1865.9491      | 933.4782         | K    | 460.2878  | 230.6475        | 443.2613  | 222.1343         |                |                  | 3  |
| 17 | 1954.9968 | 978.0020        | 1937.9702 | 969.4888         | 1936.9862      | 968.9967         | A    | 218.1499  | 109.5786        | 201.1234  | 101.0653         |                |                  | 2  |
| 18 |           |                 |           |                  |                |                  | K    | 147.1128  | 74.0600         | 130.0863  | 65.5468          |                |                  | 1  |

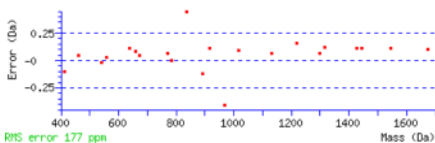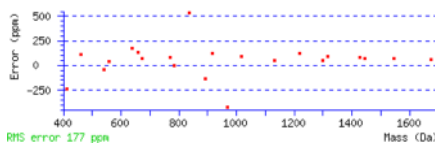

NCBI BLAST search of **TITLEVEPSDTIENVKAK**  
 (Parameters: blastp, nr protein database, expect=20000, no filter, PAM30)  
 Other BLAST [web gateways](#)

**All matches to this query**

| Score | Mr(calc): | Delta   | Sequence                            |
|-------|-----------|---------|-------------------------------------|
| 47.9  | 2100.0950 | 0.2524  | <a href="#">TITLEVEPSDTIENVKAK</a>  |
| 47.9  | 2100.0950 | 0.2524  | <a href="#">TITLEVEPSDTIENVKAK</a>  |
| 22.7  | 2098.9993 | 1.3481  | <a href="#">AQKVDEAIYAFNVMEK</a>    |
| 14.4  | 2100.9505 | -0.6031 | <a href="#">EVMDFKFAHHPFVCMSEK</a>  |
| 11.8  | 2099.0464 | 1.3010  | <a href="#">SLMMLENAAKYLPNLMTEK</a> |
| 10.7  | 2100.0811 | 0.2664  | <a href="#">NVGSSLVEEDKLDLAKR</a>   |
| 10.7  | 2100.1547 | 0.1927  | <a href="#">EVISILMQRQVMVDGKVR</a>  |
| 10.6  | 2099.0323 | 1.3151  | <a href="#">KEDAIIFYTISLGSNHK</a>   |
| 10.3  | 2101.1241 | -0.7767 | <a href="#">OPTDSEMKALLAQQWKIVK</a> |
| 9.7   | 2100.0851 | 0.2623  | <a href="#">QNFSVNNVDITVIVEAPK</a>  |

**MASCOT** **SCIENCE** Mascot Search Results

Peptide View

MS/MS Fragmentation of **NLLHDNELSDLKEDGGSGGDL.SALR**  
 Found in **YD\_RFP-BARD-BRCA-Ub**, YD\_RFP-BARD-BRCA-Ub

Match to Query 856: 2738.741172 from(913.921000,3+) intensity(3406834.0000)  
 Title: Cmpd 118, +MSn(914.46), 27.8 min  
 Data file C:\YaelDavid\100203\_YaelDavid\BIT00812\_YD\_4\_merge.mgf

Click mouse within plot area to zoom in by factor of two about that point  
 Or, Plot from 200 to 1900 Da Full range  
 Label all possible matches  Label matches used for scoring

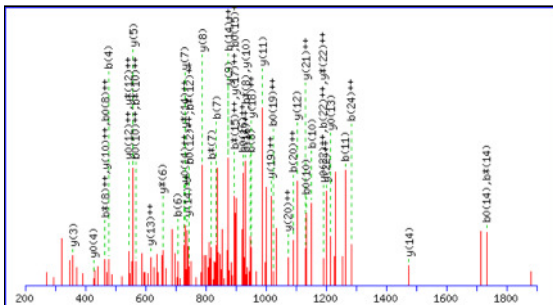

Monoisotopic mass of neutral peptide Mr(calc): 2738.3107  
 Fixed modifications: Carbamidomethyl (C) (apply to specified residues or termini only)  
 Variable modifications:  
 K12 : GlyGly (K)  
 Ions Score: 50 Expect: 0.0024  
 Matches : 53/274 fragment ions using 86 most intense peaks ([help](#))

| #  | b                | b <sup>++</sup>  | b <sup>*</sup>   | b <sup>*++</sup> | b <sup>0</sup>   | b <sup>0++</sup> | Seq. | y                | y <sup>++</sup>  | y <sup>*</sup>  | y <sup>*++</sup> | y <sup>0</sup>   | y <sup>0++</sup> | #  |
|----|------------------|------------------|------------------|------------------|------------------|------------------|------|------------------|------------------|-----------------|------------------|------------------|------------------|----|
| 1  | 115.0502         | 58.0287          | 98.0237          | 49.5155          |                  |                  | N    |                  |                  |                 |                  |                  |                  | 25 |
| 2  | 228.1343         | 114.5708         | 211.1077         | 106.0575         |                  |                  | L    | 2625.2751        | 1313.1412        | 2608.2485       | 1304.6279        | 2607.2645        | 1304.1359        | 24 |
| 3  | 341.2183         | 171.1128         | 324.1918         | 162.5995         |                  |                  | L    | 2512.1910        | 1256.5991        | 2495.1645       | 1248.0859        | 2494.1804        | 1247.5939        | 23 |
| 4  | <b>478.2772</b>  | 239.6423         | 461.2507         | 231.1290         |                  |                  | H    | 2399.1069        | <b>1200.0571</b> | 2382.0804       | <b>1191.5438</b> | 2381.0964        | <b>1191.0518</b> | 22 |
| 5  | 593.3042         | 297.1557         | 576.2776         | 288.6425         | 575.2936         | 288.1504         | D    | 2262.0480        | <b>1131.5277</b> | 2245.0215       | 1123.0144        | 2244.0375        | 1122.5224        | 21 |
| 6  | <b>707.3471</b>  | 354.1772         | 690.3206         | 345.6639         | 689.3365         | 345.1719         | N    | 2147.0211        | <b>1074.0142</b> | 2129.9945       | 1065.5009        | 2129.0105        | 1065.0089        | 20 |
| 7  | <b>836.3897</b>  | 418.6985         | <b>819.3632</b>  | 410.1852         | 818.3791         | 409.6932         | E    | 2032.9782        | <b>1016.9927</b> | 2015.9516       | 1008.4794        | 2014.9676        | 1007.9874        | 19 |
| 8  | <b>949.4738</b>  | 475.2405         | <b>932.4472</b>  | <b>466.7272</b>  | 931.4632         | <b>466.2352</b>  | L    | 1903.9356        | <b>952.4714</b>  | 1886.9090       | 943.9582         | 1885.9250        | 943.4661         | 18 |
| 9  | 1036.5058        | 518.7565         | 1019.4792        | 510.2433         | 1018.4952        | 509.7513         | S    | 1790.8515        | <b>895.9294</b>  | 1773.8250       | 887.4161         | 1772.8409        | 886.9241         | 17 |
| 10 | <b>1151.5327</b> | 576.2700         | 1134.5062        | <b>567.7567</b>  | <b>1133.5222</b> | <b>567.2647</b>  | D    | 1703.8195        | 852.4134         | 1686.7929       | 843.9001         | 1685.8089        | 843.4081         | 16 |
| 11 | <b>1264.6168</b> | 632.8120         | 1247.5903        | 624.2988         | 1246.6062        | 623.8068         | L    | 1588.7925        | 794.8999         | 1571.7660       | 786.3866         | 1570.7820        | 785.8946         | 15 |
| 12 | 1506.7547        | 753.8810         | 1489.7281        | <b>745.3677</b>  | 1488.7441        | <b>744.8757</b>  | K    | <b>1475.7085</b> | <b>738.3579</b>  | 1458.6819       | <b>729.8446</b>  | 1457.6979        | <b>729.3526</b>  | 14 |
| 13 | 1635.7973        | 818.4023         | 1618.7707        | 809.8890         | 1617.7867        | 809.3970         | E    | 1233.5706        | <b>617.2889</b>  | 1216.5440       | 608.7757         | <b>1215.5600</b> | 608.2836         | 13 |
| 14 | 1750.8242        | <b>875.9158</b>  | <b>1733.7977</b> | 867.4025         | <b>1732.8137</b> | 866.9105         | D    | <b>1104.5280</b> | 552.7676         | 1087.5014       | <b>544.2544</b>  | 1086.5174        | <b>543.7624</b>  | 12 |
| 15 | 1807.8457        | 904.4265         | 1790.8191        | <b>895.9132</b>  | 1789.8351        | <b>895.4212</b>  | G    | <b>989.5010</b>  | 495.2542         | 972.4745        | 486.7409         | 971.4905         | 486.2489         | 11 |
| 16 | 1864.8672        | <b>932.9372</b>  | 1847.8406        | 924.4239         | 1846.8566        | <b>923.9319</b>  | G    | <b>932.4796</b>  | <b>466.7434</b>  | 915.4530        | 458.2302         | 914.4690         | 457.7381         | 10 |
| 17 | 1951.8992        | 976.4532         | 1934.8726        | 967.9400         | 1933.8886        | 967.4479         | S    | <b>875.4581</b>  | 438.2327         | 858.4316        | 429.7194         | 857.4476         | 429.2274         | 9  |
| 18 | 2008.9207        | 1004.9640        | 1991.8941        | 996.4507         | 1990.9101        | 995.9587         | G    | <b>788.4261</b>  | 394.7167         | 771.3995        | 386.2034         | 770.4155         | 385.7114         | 8  |
| 19 | 2065.9421        | 1033.4747        | 2048.9156        | 1024.9614        | 2047.9315        | <b>1024.4694</b> | G    | <b>731.4046</b>  | 366.2060         | 714.3781        | 357.6927         | 713.3941         | 357.2007         | 7  |
| 20 | 2180.9691        | <b>1090.9882</b> | 2163.9425        | 1082.4749        | 2162.9585        | 1081.9829        | D    | 674.3832         | 337.6952         | <b>657.3566</b> | 329.1819         | 656.3726         | 328.6899         | 6  |
| 21 | 2294.0531        | 1147.5302        | 2277.0266        | 1139.0169        | 2276.0426        | 1138.5249        | L    | <b>559.3562</b>  | 280.1817         | 542.3297        | 271.6685         | 541.3457         | 271.1765         | 5  |
| 22 | 2381.0851        | <b>1191.0462</b> | 2364.0586        | 1182.5329        | 2363.0746        | 1182.0409        | S    | 446.2722         | 223.6397         | 429.2456        | 215.1264         | <b>428.2616</b>  | 214.6344         | 4  |
| 23 | 2452.1223        | 1226.5648        | 2435.0957        | 1218.0515        | 2434.1117        | 1217.5595        | A    | <b>359.2401</b>  | 180.1237         | 342.2136        | 171.6104         |                  |                  | 3  |
| 24 | 2565.2063        | <b>1283.1068</b> | 2548.1798        | 1274.5935        | 2547.1958        | 1274.1015        | L    | 288.2030         | 144.6051         | 271.1765        | 136.0919         |                  |                  | 2  |
| 25 |                  |                  |                  |                  |                  |                  | R    | 175.1190         | 88.0631          | 158.0924        | 79.5498          |                  |                  | 1  |

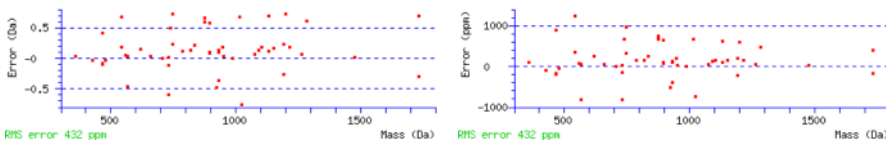

NCBI BLAST search of **NLLHDNELSDLKEDGGSGGDL.SALR**  
 (Parameters: blastp, nr protein database, expect=20000, no filter, PAM30)  
 Other BLAST [web gateways](#)

All matches to this query

| Score | Mr(calc): | Delta   | Sequence                                   |
|-------|-----------|---------|--------------------------------------------|
| 49.7  | 2738.3107 | 0.4305  | <a href="#">NLLHDNELSDLKEDGGSGGDL.SALR</a> |
| 20.9  | 2737.3996 | 1.3415  | <a href="#">ERLESLVNFSTVMAFIKGTPEEPK</a>   |
| 17.4  | 2739.3109 | -0.5697 | <a href="#">WSAAKVVIVVGCGERGNEMTDELK</a>   |
| 16.3  | 2738.3116 | 0.4296  | <a href="#">NVCIQTDRETFLKPCDAESKATR</a>    |
| 15.2  | 2739.4555 | -0.7143 | <a href="#">KPVELKKDSL EAGEVGVLSASIR</a>   |
| 15.2  | 2739.4555 | -0.7143 | <a href="#">KPVELKKDSL EAGEVGVLSASIR</a>   |
| 15.2  | 2738.4603 | 0.2809  | <a href="#">IVEIYGPSSGKTTLALHAIQAQAK</a>   |
| 14.5  | 2739.3109 | -0.5697 | <a href="#">AKDTSMTWVVKMNQENL.PFR</a>      |
| 14.2  | 2738.4683 | 0.2728  | <a href="#">IQLQERLGISLQQGDAIL.GMPMRR</a>  |

|      |           |         |                                         |
|------|-----------|---------|-----------------------------------------|
| 14.2 | 2739.3915 | -0.6503 | <a href="#">LVHPSNGNLIWFMDKQAGSKLDR</a> |
|------|-----------|---------|-----------------------------------------|

|                                                                                          |
|------------------------------------------------------------------------------------------|
| <b>Mascot:</b> <a href="http://www.matrixscience.com/">http://www.matrixscience.com/</a> |
|------------------------------------------------------------------------------------------|

**MASCOT** **SCIENCE** Mascot Search Results

Peptide View

MS/MS Fragmentation of **LIFAGKQLEDGR**

Found in **YD\_RFP-BARD-BRCA-Ub**, YD\_RFP-BARD-BRCA-Ub

Match to Query 467: 1459.933448 from (730.974000,2+) intensity(2962866.0000)

Title: Cmpd 64, +MSn(731.37), 24.4 min

Data file C:\YaelDavid\100203\_YaelDavid\BIT00812\_YD\_4\_merge.mgf

Click mouse within plot area to zoom in by factor of two about that point

Or, Plot from 200 to 1300 Da Full range

Label all possible matches  Label matches used for scoring

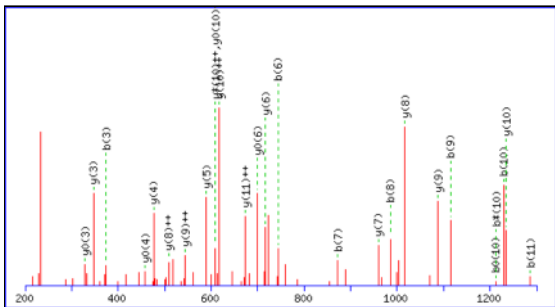

Monoisotopic mass of neutral peptide Mr(calc): 1459.7783

Fixed modifications: Carbamidomethyl (C) (apply to specified residues or termini only)

Variable modifications:

K6 : GlyGly (K)

Ions Score: 72 Expect: 8.6e-05

Matches : 26/102 Fragment ions using 32 most intense peaks [\(help\)](#)

| #  | b         | b <sup>++</sup> | b*        | b <sup>*++</sup> | b <sup>0</sup> | b <sup>0++</sup> | Seq. | y         | y <sup>++</sup> | y*        | y <sup>*++</sup> | y <sup>0</sup> | y <sup>0++</sup> | #  |
|----|-----------|-----------------|-----------|------------------|----------------|------------------|------|-----------|-----------------|-----------|------------------|----------------|------------------|----|
| 1  | 114.0913  | 57.5493         |           |                  |                |                  | L    |           |                 |           |                  |                |                  | 12 |
| 2  | 227.1754  | 114.0913        |           |                  |                |                  | I    | 1347.7015 | 674.3544        | 1330.6750 | 665.8411         | 1329.6910      | 665.3491         | 11 |
| 3  | 374.2438  | 187.6255        |           |                  |                |                  | F    | 1234.6175 | 617.8124        | 1217.5909 | 609.2991         | 1216.6069      | 608.8071         | 10 |
| 4  | 445.2809  | 223.1441        |           |                  |                |                  | A    | 1087.5491 | 544.2782        | 1070.5225 | 535.7649         | 1069.5385      | 535.2729         | 9  |
| 5  | 502.3024  | 251.6548        |           |                  |                |                  | G    | 1016.5119 | 508.7596        | 999.4854  | 500.2463         | 998.5014       | 499.7543         | 8  |
| 6  | 744.4403  | 372.7238        | 727.4137  | 364.2105         |                |                  | K    | 959.4905  | 480.2489        | 942.4639  | 471.7356         | 941.4799       | 471.2436         | 7  |
| 7  | 872.4989  | 436.7531        | 855.4723  | 428.2398         |                |                  | Q    | 717.3526  | 359.1799        | 700.3260  | 350.6667         | 699.3420       | 350.1747         | 6  |
| 8  | 985.5829  | 493.2951        | 968.5564  | 484.7818         |                |                  | L    | 589.2940  | 295.1506        | 572.2675  | 286.6374         | 571.2835       | 286.1454         | 5  |
| 9  | 1114.6255 | 557.8164        | 1097.5990 | 549.3031         | 1096.6150      | 548.8111         | E    | 476.2100  | 238.6086        | 459.1834  | 230.0953         | 458.1994       | 229.6033         | 4  |
| 10 | 1229.6525 | 615.3299        | 1212.6259 | 606.8166         | 1211.6419      | 606.3246         | D    | 347.1674  | 174.0873        | 330.1408  | 165.5740         | 329.1568       | 165.0820         | 3  |
| 11 | 1286.6739 | 643.8406        | 1269.6474 | 635.3273         | 1268.6634      | 634.8353         | G    | 232.1404  | 116.5738        | 215.1139  | 108.0606         |                |                  | 2  |
| 12 |           |                 |           |                  |                |                  | R    | 175.1190  | 88.0631         | 158.0924  | 79.5498          |                |                  | 1  |

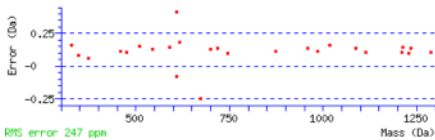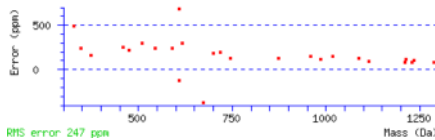

NCBI BLAST search of **LIFAGKQLEDGR**

(Parameters: blastp, nr protein database, expect=20000, no filter, PAM30)

Other BLAST [web gateways](#)

All matches to this query

| Score | Mr(calc): | Delta   | Sequence                        |
|-------|-----------|---------|---------------------------------|
| 71.6  | 1459.7783 | 0.1551  | <a href="#">LIFAGKQLEDGR</a>    |
| 27.3  | 1459.6725 | 0.2609  | <a href="#">EAAALQCQLEDGR</a>   |
| 23.7  | 1459.8068 | 0.1267  | <a href="#">ILQEKMEKAIK</a>     |
| 22.7  | 1460.7544 | -0.8210 | <a href="#">NIIEMQOLELSK</a>    |
| 21.6  | 1459.7307 | 0.2028  | <a href="#">ALENALPYLEDGR</a>   |
| 21.3  | 1459.6903 | 0.2432  | <a href="#">DEEKKEEVQGR</a>     |
| 20.2  | 1459.8293 | 0.1042  | <a href="#">LIRMIRTAGALK</a>    |
| 19.9  | 1459.8610 | 0.0725  | <a href="#">TKTKLSVIESIK</a>    |
| 19.9  | 1459.8610 | 0.0725  | <a href="#">TKTKLSVLESIK</a>    |
| 19.9  | 1459.7718 | 0.1616  | <a href="#">HGGGMPYVGAFFGRR</a> |

Mascot: <http://www.matrixscience.com/>

**MASCOT** **SCIENCE** Mascot Search Results

Peptide View

MS/MS Fragmentation of **TLSDYNIQKESTLHLVLR**  
 Found in **YD\_RFP-BARD-BRCA-Ub**, YD\_RFP-BARD-BRCA-Ub

Match to Query 801: 2243.516172 from(748.846000,3+) intensity(584427.0000)  
 Title: Cmpd 100, +MSn(749.29), 27.4 min  
 Data file C:\YaelDavid\100203\_YaelDavid\BIT00812\_YD\_4\_merge.mgf

Click mouse within plot area to zoom in by factor of two about that point  
 Or, Plot from 200 to 1100 Da Full range  
 Label all possible matches  Label matches used for scoring

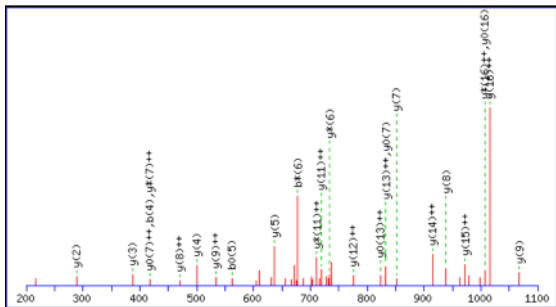

Monoisotopic mass of neutral peptide Mr(calc): 2243.1910  
 Fixed modifications: Carbamidomethyl (C) (apply to specified residues or termini only)  
 Variable modifications:  
 K9 : GlyGly (K)  
 Ions Score: 72 Expect: 7.5e-05  
 Matches : 26/182 fragment ions using 27 most intense peaks (help)

| #  | b         | b <sup>++</sup> | b*        | b <sup>*++</sup> | b <sup>0</sup> | b <sup>0++</sup> | Seq. | y         | y <sup>++</sup> | y*        | y <sup>*++</sup> | y <sup>0</sup> | y <sup>0++</sup> | #  |
|----|-----------|-----------------|-----------|------------------|----------------|------------------|------|-----------|-----------------|-----------|------------------|----------------|------------------|----|
| 1  | 102.0550  | 51.5311         |           |                  | 84.0444        | 42.5258          | T    |           |                 |           |                  |                |                  | 18 |
| 2  | 215.1390  | 108.0731        |           |                  | 197.1285       | 99.0679          | L    | 2143.1506 | 1072.0789       | 2126.1240 | 1063.5657        | 2125.1400      | 1063.0737        | 17 |
| 3  | 302.1710  | 151.5892        |           |                  | 284.1605       | 142.5839         | S    | 2030.0665 | 1015.5369       | 2013.0400 | 1007.0236        | 2012.0560      | 1006.5316        | 16 |
| 4  | 417.1980  | 209.1026        |           |                  | 399.1874       | 200.0974         | D    | 1943.0345 | 972.0209        | 1926.0080 | 963.5076         | 1925.0239      | 963.0156         | 15 |
| 5  | 580.2613  | 290.6343        |           |                  | 562.2508       | 281.6290         | Y    | 1828.0076 | 914.5074        | 1810.9810 | 905.9941         | 1809.9970      | 905.5021         | 14 |
| 6  | 694.3042  | 347.6558        | 677.2777  | 339.1425         | 676.2937       | 338.6505         | N    | 1664.9442 | 832.9758        | 1647.9177 | 824.4625         | 1646.9337      | 823.9705         | 13 |
| 7  | 807.3883  | 404.1978        | 790.3618  | 395.6845         | 789.3777       | 395.1925         | I    | 1550.9013 | 775.9543        | 1533.8748 | 767.4410         | 1532.8907      | 766.9490         | 12 |
| 8  | 935.4469  | 468.2271        | 918.4203  | 459.7138         | 917.4363       | 459.2218         | Q    | 1437.8172 | 719.4123        | 1420.7907 | 710.8990         | 1419.8067      | 710.4070         | 11 |
| 9  | 1177.5848 | 589.2960        | 1160.5582 | 580.7828         | 1159.5742      | 580.2907         | K    | 1309.7587 | 655.3830        | 1292.7321 | 646.8697         | 1291.7481      | 646.3777         | 10 |
| 10 | 1306.6274 | 653.8173        | 1289.6008 | 645.3040         | 1288.6168      | 644.8120         | E    | 1067.6208 | 534.3140        | 1050.5942 | 525.8007         | 1049.6102      | 525.3087         | 9  |
| 11 | 1393.6594 | 697.3333        | 1376.6329 | 688.8201         | 1375.6488      | 688.3281         | S    | 938.5782  | 469.7927        | 921.5516  | 461.2795         | 920.5676       | 460.7874         | 8  |
| 12 | 1494.7071 | 747.8572        | 1477.6805 | 739.3439         | 1476.6965      | 738.8519         | T    | 851.5461  | 426.2767        | 834.5196  | 417.7634         | 833.5356       | 417.2714         | 7  |
| 13 | 1607.7911 | 804.3992        | 1590.7646 | 795.8859         | 1589.7806      | 795.3939         | L    | 750.4985  | 375.7529        | 733.4719  | 367.2396         |                |                  | 6  |
| 14 | 1744.8501 | 872.9287        | 1727.8235 | 864.4154         | 1726.8395      | 863.9234         | H    | 637.4144  | 319.2108        | 620.3879  | 310.6976         |                |                  | 5  |
| 15 | 1857.9341 | 929.4707        | 1840.9076 | 920.9574         | 1839.9236      | 920.4654         | L    | 500.3555  | 250.6814        | 483.3289  | 242.1681         |                |                  | 4  |
| 16 | 1957.0025 | 979.0049        | 1939.9760 | 970.4916         | 1938.9920      | 969.9996         | V    | 387.2714  | 194.1394        | 370.2449  | 185.6261         |                |                  | 3  |
| 17 | 2070.0866 | 1035.5469       | 2053.0600 | 1027.0337        | 2052.0760      | 1026.5417        | L    | 288.2030  | 144.6051        | 271.1765  | 136.0919         |                |                  | 2  |
| 18 |           |                 |           |                  |                |                  | R    | 175.1190  | 88.0631         | 158.0924  | 79.5498          |                |                  | 1  |

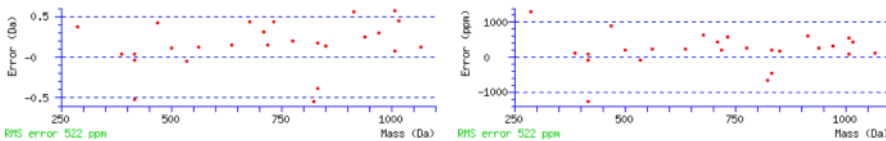

NCBI BLAST search of **TLSDYNIQKESTLHLVLR**  
 (Parameters: blastp, nr protein database, expect=20000, no filter, PAM30)  
 Other BLAST [web gateways](#)

All matches to this query

| Score | Mr(calc): | Delta   | Sequence                               |
|-------|-----------|---------|----------------------------------------|
| 72.0  | 2243.1910 | 0.3252  | <a href="#">TLSDYNIQKESTLHLVLR</a>     |
| 27.1  | 2243.0713 | 0.4449  | <a href="#">ESMQARGGPDGGNGGKGGDVIR</a> |
| 21.4  | 2244.1718 | -0.6557 | <a href="#">TNQMPNAVQKLLLVMDKR</a>     |
| 21.4  | 2244.1718 | -0.6557 | <a href="#">TNQMPNAVQKLLLVMDKR</a>     |
| 20.1  | 2243.2056 | 0.3106  | <a href="#">QSSNAVAKPSKMAATKVAVK</a>   |
| 18.8  | 2243.2381 | 0.2781  | <a href="#">ELLSVRELKPIKMDGMVIR</a>    |
| 18.3  | 2243.1506 | 0.3656  | <a href="#">TKTNNSSGLQGGISNGEELVIR</a> |
| 17.6  | 2241.3395 | 2.1767  | <a href="#">LAAKGVKVKPGMVGIVLR</a>     |
| 17.6  | 2241.3395 | 2.1767  | <a href="#">LAAKGVKVKPGMVGIVLR</a>     |
| 17.6  | 2241.3395 | 2.1767  | <a href="#">LAAKGVKVKPGMVGIVLR</a>     |

MASCOT SCIENCE Mascot Search Results

Protein View

Match to: YD\_RFP-BARD-BRCA-Ub Score: 5566

YD\_RFP-BARD-BRCA-Ub

Found in search of C:\YaelDavid\100203\_YaelDavid\BIT00814\_YD\_5\_merge.mgf

Nominal mass (M<sub>r</sub>): 60628; Calculated pI value: 6.10

NCBI BLAST search of YD\_RFP-BARD-BRCA-Ub against nr

Unformatted sequence string for pasting into other applications

Fixed modifications: Carbamidomethyl (C)

Variable modifications: GlyGly (K), Oxidation (M)

Cleavage by Trypsin: cuts C-term side of KR unless next residue is P

Sequence Coverage: 57%

Matched peptides shown in Bold Red

1 MHHHHHHASS EDVIKEFMRF KVRMEGVSNG HEFEIEGEGR GRPYEGTQTA
51 KLRKVTGGGPEL PFAMWLLSPPQ FQYGSKAYVK HPADIPDYLRK LSFPEGFKWE
101 RVNMFEDGGV VTTQDSSLQ DGEFLYKVKL RGTNFPDGGP VMQKRTMGWE
151 ASTERMYFED GALKGEIEMR LKLDGGHYD AENVITPMK KPVQLPGAYK
201 TDIKLDTFSH NEDTIVTEYR EREAEGRHSYG AENLIPQGLE EFDGGAWAH
251 SRALLDRLEK LLRCSGWTI LRPEVCLGRI EHLFCSNVS DCIQTGCPVC
301 VTPAWIQDLK INRQLDSMIQ LCSKLRNLLH DNELSDIKED GSGGSDLSAL
351 RVEEYQNVIN AMQKILCEPI CLELLEKPVV TKDCHIFCKF CMLKLLNQKK
401 GFSQCEPLCKN DTKRSLQES TRFSQLAVEK LKILICARQLD TGLEANSYN
451 FAKQIFVKVTL TGRKTTLEVE PSTDIENVEK KIQQKEGIPP DQQRILFAGK
501 QLEDGRSLSD YNIQKRESLH LVLRRLRGG

Show predicted peptides also

Sort Peptides By Residue Number Increasing Mass Decreasing Mass

Table with columns: Start, End, Observed, Mr (expt), Mr (calc), Delta, Miss, Sequence. Contains a list of peptides with their observed and calculated masses, delta values, and sequence details including modifications and ion scores.



|           |          |           |           |        |   |               |                 |
|-----------|----------|-----------|-----------|--------|---|---------------|-----------------|
| 507 - 515 | 541.3760 | 1080.7374 | 1080.5451 | 0.1923 | 0 | R.TLSDYNIQK.E | (Ions score 52) |
| 507 - 515 | 541.3800 | 1080.7454 | 1080.5451 | 0.2003 | 0 | R.TLSDYNIQK.E | (Ions score 26) |
| 507 - 515 | 541.3840 | 1080.7534 | 1080.5451 | 0.2083 | 0 | R.TLSDYNIQK.E | (Ions score 51) |
| 507 - 515 | 541.4000 | 1080.7854 | 1080.5451 | 0.2403 | 0 | R.TLSDYNIQK.E | (Ions score 41) |
| 507 - 515 | 541.4150 | 1080.8154 | 1080.5451 | 0.2703 | 0 | R.TLSDYNIQK.E | (Ions score 29) |
| 516 - 524 | 534.3630 | 1066.7114 | 1066.6135 | 0.0980 | 0 | K.ESTLHLVLR.L | (Ions score 54) |
| 516 - 524 | 534.3830 | 1066.7514 | 1066.6135 | 0.1380 | 0 | K.ESTLHLVLR.L | (Ions score 39) |
| 516 - 524 | 534.3960 | 1066.7774 | 1066.6135 | 0.1640 | 0 | K.ESTLHLVLR.L | (Ions score 48) |
| 516 - 524 | 534.4040 | 1066.7934 | 1066.6135 | 0.1800 | 0 | K.ESTLHLVLR.L | (Ions score 61) |
| 516 - 524 | 534.4180 | 1066.8214 | 1066.6135 | 0.2080 | 0 | K.ESTLHLVLR.L | (Ions score 61) |
| 516 - 524 | 534.4280 | 1066.8414 | 1066.6135 | 0.2280 | 0 | K.ESTLHLVLR.L | (Ions score 65) |
| 516 - 524 | 534.4580 | 1066.9014 | 1066.6135 | 0.2880 | 0 | K.ESTLHLVLR.L | (Ions score 41) |
| 516 - 524 | 534.4780 | 1066.9414 | 1066.6135 | 0.3280 | 0 | K.ESTLHLVLR.L | (Ions score 41) |

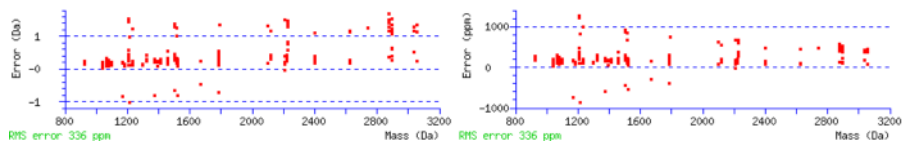

Mascot: <http://www.matrixscience.com/>



**MASCOT** **SCIENCE** Mascot Search Results

Peptide View

MS/MS Fragmentation of **TLTGKTITLEVEPSDTIENVK**  
 Found in **YD\_RFP-BARD-BRCA-Ub**, YD\_RFP-BARD-BRCA-Ub

Match to Query 840: 2401.489448 from(1201.752000,2+) intensity(3469580.0000)  
 Title: Cmpd 130, +MSn(1202.36), 27.2 min  
 Data file C:\YaelDavid\100203\_YaelDavid\BIT00814\_YD\_5\_merge.mgf

Click mouse within plot area to zoom in by factor of two about that point

Or, Plot from 300 to 2000 Da Full range

Label all possible matches  Label matches used for scoring

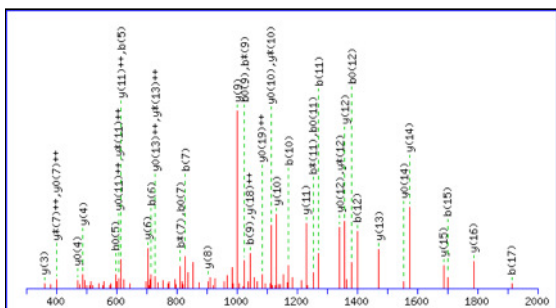

Monoisotopic mass of neutral peptide Mr(calc): 2401.2588  
 Fixed modifications: Carbamidomethyl (C) (apply to specified residues or termini only)  
 Variable modifications:  
 K5 : GlyGly (K)  
 Ions Score: 100 Expect: 1.7e-07  
 Matches : 44/226 fragment ions using 40 most intense peaks (help)

| #  | b         | b <sup>++</sup> | b <sup>*</sup> | b <sup>*++</sup> | b <sup>0</sup> | b <sup>0++</sup> | Seq. | y         | y <sup>++</sup> | y <sup>*</sup> | y <sup>*++</sup> | y <sup>0</sup> | y <sup>0++</sup> | #  |
|----|-----------|-----------------|----------------|------------------|----------------|------------------|------|-----------|-----------------|----------------|------------------|----------------|------------------|----|
| 1  | 102.0550  | 51.5311         |                |                  | 84.0444        | 42.5258          | T    |           |                 |                |                  |                |                  | 21 |
| 2  | 215.1390  | 108.0731        |                |                  | 197.1285       | 99.0679          | L    | 2301.2184 | 1151.1128       | 2284.1918      | 1142.5996        | 2283.2078      | 1142.1076        | 20 |
| 3  | 316.1867  | 158.5970        |                |                  | 298.1761       | 149.5917         | T    | 2188.1343 | 1094.5708       | 2171.1078      | 1086.0575        | 2170.1238      | 1085.5655        | 19 |
| 4  | 373.2082  | 187.1077        |                |                  | 355.1976       | 178.1024         | G    | 2087.0867 | 1044.0470       | 2070.0601      | 1035.5337        | 2069.0761      | 1035.0417        | 18 |
| 5  | 615.3461  | 308.1767        | 598.3195       | 299.6634         | 597.3355       | 299.1714         | K    | 2030.0652 | 1015.5362       | 2013.0386      | 1007.0230        | 2012.0546      | 1006.5310        | 17 |
| 6  | 716.3937  | 358.7005        | 699.3672       | 350.1872         | 698.3832       | 349.6952         | T    | 1787.9273 | 894.4673        | 1770.9008      | 885.9540         | 1769.9167      | 885.4620         | 16 |
| 7  | 829.4778  | 415.2425        | 812.4512       | 406.7293         | 811.4672       | 406.2373         | I    | 1686.8796 | 843.9434        | 1669.8531      | 835.4302         | 1668.8691      | 834.9382         | 15 |
| 8  | 930.5255  | 465.7664        | 913.4989       | 457.2531         | 912.5149       | 456.7611         | T    | 1573.7956 | 787.4014        | 1556.7690      | 778.8881         | 1555.7850      | 778.3961         | 14 |
| 9  | 1043.6095 | 522.3084        | 1026.5830      | 513.7951         | 1025.5990      | 513.3031         | L    | 1472.7479 | 736.8776        | 1455.7213      | 728.3643         | 1454.7373      | 727.8723         | 13 |
| 10 | 1172.6521 | 586.8297        | 1155.6256      | 578.3164         | 1154.6416      | 577.8244         | E    | 1359.6638 | 680.3355        | 1342.6373      | 671.8223         | 1341.6533      | 671.3303         | 12 |
| 11 | 1271.7205 | 636.3639        | 1254.6940      | 627.8506         | 1253.7100      | 627.3586         | V    | 1230.6212 | 615.8142        | 1213.5947      | 607.3010         | 1212.6107      | 606.8090         | 11 |
| 12 | 1400.7631 | 700.8852        | 1383.7366      | 692.3719         | 1382.7526      | 691.8799         | E    | 1131.5528 | 566.2800        | 1114.5263      | 557.7668         | 1113.5422      | 557.2748         | 10 |
| 13 | 1497.8159 | 749.4116        | 1480.7894      | 740.8983         | 1479.8053      | 740.4063         | P    | 1002.5102 | 501.7587        | 985.4837       | 493.2455         | 984.4997       | 492.7535         | 9  |
| 14 | 1584.8479 | 792.9276        | 1567.8214      | 784.4143         | 1566.8374      | 783.9223         | S    | 905.4575  | 453.2324        | 888.4309       | 444.7191         | 887.4469       | 444.2271         | 8  |
| 15 | 1699.8749 | 850.4411        | 1682.8483      | 841.9278         | 1681.8643      | 841.4358         | D    | 818.4254  | 409.7163        | 801.3989       | 401.2031         | 800.4149       | 400.7111         | 7  |
| 16 | 1800.9226 | 900.9649        | 1783.8960      | 892.4516         | 1782.9120      | 891.9596         | T    | 703.3985  | 352.2029        | 686.3719       | 343.6896         | 685.3879       | 343.1976         | 6  |
| 17 | 1914.0066 | 957.5069        | 1896.9801      | 948.9937         | 1895.9961      | 948.5017         | I    | 602.3508  | 301.6790        | 585.3243       | 293.1658         | 584.3402       | 292.6738         | 5  |
| 18 | 2043.0492 | 1022.0282       | 2026.0227      | 1013.5150        | 2025.0386      | 1013.0230        | E    | 489.2667  | 245.1370        | 472.2402       | 236.6237         | 471.2562       | 236.1317         | 4  |
| 19 | 2157.0921 | 1079.0497       | 2140.0656      | 1070.5364        | 2139.0816      | 1070.0444        | N    | 360.2241  | 180.6157        | 343.1976       | 172.1024         |                |                  | 3  |
| 20 | 2256.1605 | 1128.5839       | 2239.1340      | 1120.0706        | 2238.1500      | 1119.5786        | V    | 246.1812  | 123.5942        | 229.1547       | 115.0810         |                |                  | 2  |
| 21 |           |                 |                |                  |                |                  | K    | 147.1128  | 74.0600         | 130.0863       | 65.5468          |                |                  | 1  |

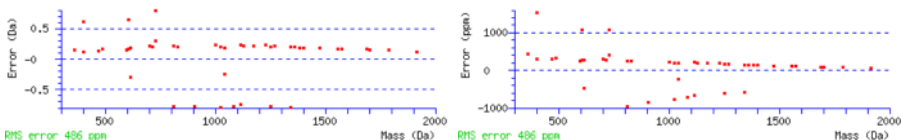

NCBI BLAST search of **TLTGKTITLEVEPSDTIENVK**  
 (Parameters: blastp, nr protein database, expect=20000, no filter, PAM30)  
 Other BLAST [web gateways](#)

All matches to this query

| Score | Mr(calc): | Delta   | Sequence                                |
|-------|-----------|---------|-----------------------------------------|
| 100.3 | 2401.2588 | 0.2307  | <a href="#">TLTGKTITLEVEPSDTIENVK</a>   |
| 27.0  | 2401.2887 | 0.2008  | <a href="#">LVSVASIGTPAMVDANGLVTKLK</a> |
| 25.3  | 2401.1188 | 0.3706  | <a href="#">RCEKEIHGVSNSAQICYSCK</a>    |
| 23.8  | 2401.1253 | 0.3641  | <a href="#">DMEIAELKKNIEQMDTDHK</a>     |
| 22.3  | 2402.2289 | -0.7394 | <a href="#">TEEVSKLQSEVODTKQALQK</a>    |
| 22.3  | 2402.2289 | -0.7394 | <a href="#">TEEVSKLQSEVODTKQALQK</a>    |
| 21.7  | 2402.2839 | -0.7944 | <a href="#">LKTGLTVDOVMAARVLESEK</a>    |
| 21.4  | 2402.2442 | -0.7547 | <a href="#">TVIGTPFVEGATVEAIVEKQGR</a>  |
| 21.4  | 2399.3094 | 2.1801  | <a href="#">KVM DVGGLISDDIHLVKER</a>    |
| 20.8  | 2399.2923 | 2.1972  | <a href="#">SYAYKTTLLIIVPMSLLTQWR</a>   |

**(MATRIX SCIENCE) Mascot Search Results**

**Peptide View**

MS/MS Fragmentation of **KPVQLPGAYK**  
 Found in **YD\_RFP-BARD-BRCA-Ub**, YD\_RFP-BARD-BRCA-Ub

Match to Query 306: 1213.803448 from (607.909000,2+) intensity(405146.0000)  
 Title: Cmpd 17, +MSn(608.47), 19.1 min  
 Data file C:\YaelDavid\100203\_YaelDavid\BIT00814\_YD\_5\_merge.mgf

Click mouse within plot area to zoom in by factor of two about that point

Or, Plot from 200 to 1100 Da Full range

Label all possible matches  Label matches used for scoring

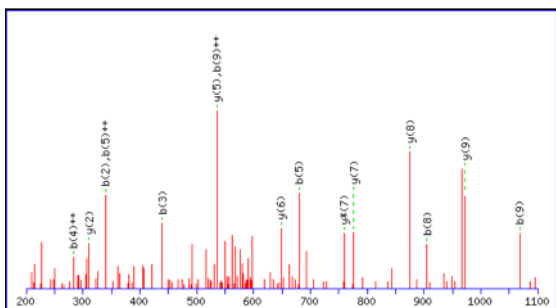

Monoisotopic mass of neutral peptide **Mr(calc)**: 1213.6819  
**Fixed modifications**: Carbamidomethyl (C) (apply to specified residues or termini only)  
**Variable modifications**:  
 K1 : GlyGly (K)  
**Ions Score**: 46 **Expect**: 0.21  
**Matches** : 15/72 fragment ions using 18 most intense peaks ([help](#))

| #  | b                | b <sup>++</sup> | b*        | b <sup>+++</sup> | Seq. | y               | y <sup>++</sup> | y*              | y <sup>+++</sup> | #  |
|----|------------------|-----------------|-----------|------------------|------|-----------------|-----------------|-----------------|------------------|----|
| 1  | 243.1452         | 122.0762        | 226.1186  | 113.5629         | K    |                 |                 |                 |                  | 10 |
| 2  | <b>340.1979</b>  | 170.6026        | 323.1714  | 162.0893         | P    | <b>972.5513</b> | 486.7793        | 955.5247        | 478.2660         | 9  |
| 3  | <b>439.2663</b>  | 220.1368        | 422.2398  | 211.6235         | V    | <b>875.4985</b> | 438.2529        | 858.4720        | 429.7396         | 8  |
| 4  | 567.3249         | <b>284.1661</b> | 550.2984  | 275.6528         | Q    | <b>776.4301</b> | 388.7187        | <b>759.4036</b> | 380.2054         | 7  |
| 5  | <b>680.4090</b>  | <b>340.7081</b> | 663.3824  | 332.1949         | L    | <b>648.3715</b> | 324.6894        | 631.3450        | 316.1761         | 6  |
| 6  | 777.4618         | 389.2345        | 760.4352  | 380.7212         | P    | <b>535.2875</b> | 268.1474        | 518.2609        | 259.6341         | 5  |
| 7  | 834.4832         | 417.7452        | 817.4567  | 409.2320         | G    | 438.2347        | 219.6210        | 421.2082        | 211.1077         | 4  |
| 8  | <b>905.5203</b>  | 453.2638        | 888.4938  | 444.7505         | A    | 381.2132        | 191.1103        | 364.1867        | 182.5970         | 3  |
| 9  | <b>1068.5837</b> | <b>534.7955</b> | 1051.5571 | 526.2822         | Y    | <b>310.1761</b> | 155.5917        | 293.1496        | 147.0784         | 2  |
| 10 |                  |                 |           |                  | K    | 147.1128        | 74.0600         | 130.0863        | 65.5468          | 1  |

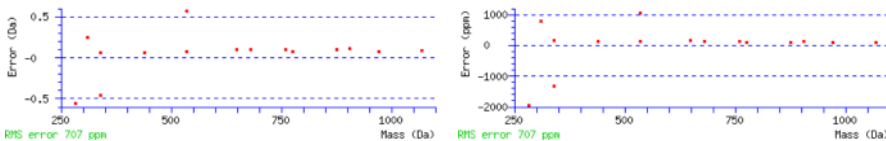

NCBI BLAST search of **KPVQLPGAYK**  
 (Parameters: blastp, nr protein database, expect=20000, no filter, PAM30)  
 Other BLAST [web gateways](#)

**All matches to this query**

| Score | Mr(calc): | Delta  | Sequence                     |
|-------|-----------|--------|------------------------------|
| 46.3  | 1213.6819 | 0.1216 | <a href="#">KPVQLPGAYK</a>   |
| 38.0  | 1213.7434 | 0.0600 | <a href="#">LILVPFLNGTK</a>  |
| 28.5  | 1213.5615 | 0.2419 | <a href="#">NFDIGLQEYK</a>   |
| 23.7  | 1213.7832 | 0.0203 | <a href="#">ILLVAVSIKMK</a>  |
| 23.7  | 1213.7394 | 0.0641 | <a href="#">LIIVNNSVKK</a>   |
| 23.7  | 1213.6805 | 0.1229 | <a href="#">LLLVELEEEK</a>   |
| 21.0  | 1213.6091 | 0.1943 | <a href="#">KEGIHPEYK</a>    |
| 19.5  | 1213.5649 | 0.2386 | <a href="#">AYGMAGLETSAK</a> |
| 18.8  | 1213.7394 | 0.0641 | <a href="#">LLEKIKQNK</a>    |
| 18.2  | 1213.7645 | 0.0389 | <a href="#">LLSSINLTK</a>    |

Mascot: <http://www.matrixscience.com/>

**MASCOT** **SCIENCE** Mascot Search Results

Peptide View

MS/MS Fragmentation of **KPVQLPGAYKTDIK**  
 Found in **YD\_RFP-BARD-BRCA-Ub**, YD\_RFP-BARD-BRCA-Ub

Match to Query 571: 1671.177448 from(836.596000,2+) intensity(1047068.0000)  
 Title: Cmpd 56, +MSn(836.98), 21.2 min  
 Data file C:\YaelDavid\100203\_YaelDavid\BIT00814\_YD\_5\_merge.mgf

Click mouse within plot area to zoom in by factor of two about that point

Or, Plot from 200 to 1500 Da Full range

Label all possible matches  Label matches used for scoring

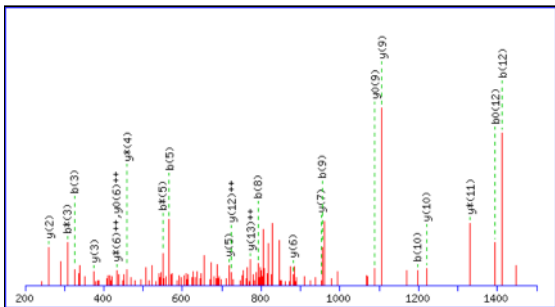

Monoisotopic mass of neutral peptide Mr(calc): 1670.9355  
 Fixed modifications: Carbamidomethyl (C) (apply to specified residues or termini only)  
 Variable modifications:  
 K10 : GlyGly (K)  
 Ions Score: 29 Expect: 0.11  
 Matches : 23/132 fragment ions using 51 most intense peaks ([help](#))

| #  | b         | b <sup>++</sup> | b*        | b <sup>*++</sup> | b <sup>0</sup> | b <sup>0++</sup> | Seq. | y         | y <sup>++</sup> | y*        | y <sup>*++</sup> | y <sup>0</sup> | y <sup>0++</sup> | #  |
|----|-----------|-----------------|-----------|------------------|----------------|------------------|------|-----------|-----------------|-----------|------------------|----------------|------------------|----|
| 1  | 129.1022  | 65.0548         | 112.0757  | 56.5415          |                |                  | K    |           |                 |           |                  |                |                  | 14 |
| 2  | 226.1550  | 113.5811        | 209.1285  | 105.0679         |                |                  | P    | 1543.8479 | 772.4276        | 1526.8213 | 763.9143         | 1525.8373      | 763.4223         | 13 |
| 3  | 325.2234  | 163.1153        | 308.1969  | 154.6021         |                |                  | V    | 1446.7951 | 723.9012        | 1429.7686 | 715.3879         | 1428.7845      | 714.8959         | 12 |
| 4  | 453.2820  | 227.1446        | 436.2554  | 218.6314         |                |                  | Q    | 1347.7267 | 674.3670        | 1330.7001 | 665.8537         | 1329.7161      | 665.3617         | 11 |
| 5  | 566.3667  | 283.6867        | 549.3395  | 275.1734         |                |                  | L    | 1219.6681 | 610.3377        | 1202.6416 | 601.8244         | 1201.6576      | 601.3324         | 10 |
| 6  | 663.4188  | 332.2130        | 646.3923  | 323.6998         |                |                  | P    | 1106.5841 | 553.7957        | 1089.5575 | 545.2824         | 1088.5735      | 544.7904         | 9  |
| 7  | 720.4403  | 360.7238        | 703.4137  | 352.2105         |                |                  | G    | 1009.5313 | 505.2693        | 992.5047  | 496.7560         | 991.5207       | 496.2640         | 8  |
| 8  | 791.4774  | 396.2423        | 774.4509  | 387.7291         |                |                  | A    | 952.5098  | 476.7585        | 935.4833  | 468.2453         | 934.4993       | 467.7533         | 7  |
| 9  | 954.5407  | 477.7740        | 937.5142  | 469.2607         |                |                  | Y    | 881.4727  | 441.2400        | 864.4462  | 432.7267         | 863.4621       | 432.2347         | 6  |
| 10 | 1196.6786 | 598.8429        | 1179.6521 | 590.3297         |                |                  | K    | 718.4094  | 359.7083        | 701.3828  | 351.1951         | 700.3988       | 350.7030         | 5  |
| 11 | 1297.7263 | 649.3668        | 1280.6998 | 640.8535         | 1279.7157      | 640.3615         | T    | 476.2715  | 238.6394        | 459.2449  | 230.1261         | 458.2609       | 229.6341         | 4  |
| 12 | 1412.7532 | 706.8803        | 1395.7267 | 698.3670         | 1394.7427      | 697.8750         | D    | 375.2238  | 188.1155        | 358.1973  | 179.6023         | 357.2132       | 179.1103         | 3  |
| 13 | 1525.8373 | 763.4223        | 1508.8108 | 754.9090         | 1507.8267      | 754.4170         | I    | 260.1969  | 130.6021        | 243.1703  | 122.0888         |                |                  | 2  |
| 14 |           |                 |           |                  |                |                  | K    | 147.1128  | 74.0600         | 130.0863  | 65.5468          |                |                  | 1  |

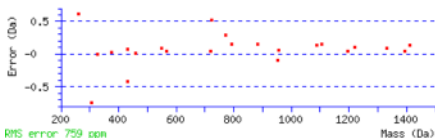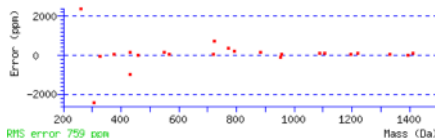

NCBI BLAST search of **KPVQLPGAYKTDIK**  
 (Parameters: blastp, nr protein database, expect=20000, no filter, PAM30)  
 Other BLAST [web gateways](#)

All matches to this query

| Score | Mr(calc): | Delta   | Sequence                           |
|-------|-----------|---------|------------------------------------|
| 29.0  | 1670.9355 | 0.2419  | <a href="#">KPVQLPGAYKTDIK</a>     |
| 18.1  | 1671.8176 | -0.6402 | <a href="#">QGNSSVVKINGEDGNGK</a>  |
| 17.3  | 1670.8562 | 0.3212  | <a href="#">GASFGRLASMKLDYR</a>    |
| 17.3  | 1670.8199 | 0.3576  | <a href="#">GASFGRLASMKLDYR</a>    |
| 16.5  | 1671.9705 | -0.7931 | <a href="#">IKVLILMGATKNK</a>      |
| 15.1  | 1670.9355 | 0.2419  | <a href="#">KPVQLPGAYKTDIK</a>     |
| 15.0  | 1671.8865 | -0.7091 | <a href="#">MLLKETHIPDGANK</a>     |
| 12.3  | 1670.8773 | 0.3001  | <a href="#">AHKEGLTLKQSAMK</a>     |
| 12.1  | 1671.6691 | -0.4916 | <a href="#">EMFSHADGMTMSAK</a>     |
| 11.6  | 1670.9567 | 0.2207  | <a href="#">TSTVLIIVGAGGIGQTLK</a> |

Mascot: <http://www.matrixscience.com/>

**MASCOT** **SCIENCE** Mascot Search Results

Peptide View

MS/MS Fragmentation of **TITLEVEPSDTIENVKAK**  
 Found in **YD\_RFP-p53-Ub**, YD\_RFP-p53-Ub

Match to Query 709: 2100.261448 from(1051.138000,2+) intensity(1215853.0000)  
 Title: Cmpd 115, +MSn(1051.56), 26.2 min  
 Data file C:\YaelDavid\100203\_YaelDavid\BIT00814\_YD\_5\_merge.mgf

Click mouse within plot area to zoom in by factor of two about that point  
 Or, Plot from 200 to 1700 Da Full range  
 Label all possible matches  Label matches used for scoring

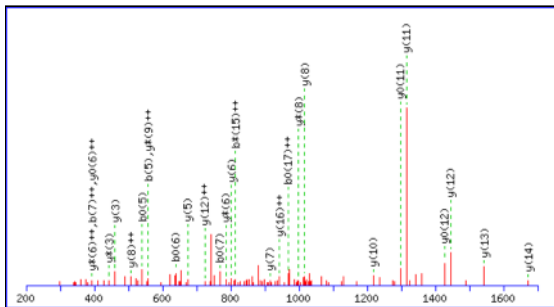

Monoisotopic mass of neutral peptide Mr(calc): 2100.0950  
 Fixed modifications: Carbamidomethyl (C) (apply to specified residues or termini only)  
 Variable modifications:  
 K16 : GlyGly (K)  
 Ions Score: 28 Expect: 0.68  
 Matches : 28/168 Fragment ions using 64 most intense peaks ([help](#))

| #  | b               | b <sup>++</sup> | b*        | b <sup>*++</sup> | b <sup>0</sup>  | b <sup>0++</sup> | Seq. | y                | y <sup>++</sup> | y*              | y <sup>*++</sup> | y <sup>0</sup>   | y <sup>0++</sup> | #  |
|----|-----------------|-----------------|-----------|------------------|-----------------|------------------|------|------------------|-----------------|-----------------|------------------|------------------|------------------|----|
| 1  | 102.0550        | 51.5311         |           |                  | 84.0444         | 42.5258          | T    |                  |                 |                 |                  |                  |                  | 18 |
| 2  | 215.1390        | 108.0731        |           |                  | 197.1285        | 99.0679          | I    | 2000.0546        | 1000.5310       | 1983.0281       | 992.0177         | 1982.0441        | 991.5257         | 17 |
| 3  | 316.1867        | 158.5970        |           |                  | 298.1761        | 149.5917         | T    | 1886.9706        | <b>943.9889</b> | 1869.9440       | 935.4756         | 1868.9600        | 934.9836         | 16 |
| 4  | 429.2708        | 215.1390        |           |                  | 411.2602        | 206.1337         | L    | 1785.9229        | 893.4651        | 1768.8963       | 884.9518         | 1767.9123        | 884.4598         | 15 |
| 5  | <b>558.3134</b> | 279.6603        |           |                  | <b>540.3028</b> | 270.6550         | E    | <b>1672.8388</b> | 836.9230        | 1655.8123       | 828.4098         | 1654.8283        | 827.9178         | 14 |
| 6  | 657.3818        | 329.1945        |           |                  | <b>639.3712</b> | 320.1892         | V    | <b>1543.7962</b> | 772.4018        | 1526.7697       | 763.8885         | 1525.7857        | 763.3965         | 13 |
| 7  | 786.4244        | <b>393.7158</b> |           |                  | <b>768.4138</b> | 384.7105         | E    | <b>1444.7278</b> | <b>722.8675</b> | 1427.7013       | 714.3543         | <b>1426.7172</b> | 713.8623         | 12 |
| 8  | 883.4771        | 442.2422        |           |                  | 865.4666        | 433.2369         | P    | <b>1315.6852</b> | 658.3462        | 1298.6587       | 649.8330         | <b>1297.6747</b> | 649.3410         | 11 |
| 9  | 970.5092        | 485.7582        |           |                  | 952.4986        | 476.7529         | S    | <b>1218.6325</b> | 609.8199        | 1201.6059       | 601.3066         | 1200.6219        | 600.8146         | 10 |
| 10 | 1085.5361       | 543.2717        |           |                  | 1067.5255       | 534.2664         | D    | 1131.6004        | 566.3039        | 1114.5739       | <b>557.7906</b>  | 1113.5899        | 557.2986         | 9  |
| 11 | 1186.5838       | 593.7955        |           |                  | 1168.5732       | 584.7902         | T    | <b>1016.5735</b> | <b>508.7904</b> | <b>999.5469</b> | 500.2771         | 998.5629         | 499.7851         | 8  |
| 12 | 1299.6678       | 650.3376        |           |                  | 1281.6573       | 641.3323         | I    | <b>915.5258</b>  | 458.2665        | 898.4993        | 449.7533         | 897.5152         | 449.2613         | 7  |
| 13 | 1428.7104       | 714.8589        |           |                  | 1410.6999       | 705.8536         | E    | <b>802.4417</b>  | 401.7245        | <b>785.4152</b> | <b>393.2112</b>  | 784.4312         | <b>392.7192</b>  | 6  |
| 14 | 1542.7534       | 771.8803        | 1525.7268 | 763.3670         | 1524.7428       | 762.8750         | N    | <b>673.3991</b>  | 337.2032        | 656.3726        | 328.6899         |                  |                  | 5  |
| 15 | 1641.8218       | 821.4145        | 1624.7952 | <b>812.9013</b>  | 1623.8112       | 812.4092         | V    | 559.3562         | 280.1817        | 542.3297        | 271.6685         |                  |                  | 4  |
| 16 | 1883.9597       | 942.4835        | 1866.9331 | 933.9702         | 1865.9491       | 933.4782         | K    | <b>460.2878</b>  | 230.6475        | <b>443.2613</b> | 222.1343         |                  |                  | 3  |
| 17 | 1954.9968       | 978.0020        | 1937.9702 | 969.4888         | 1936.9862       | <b>968.9967</b>  | A    | 218.1499         | 109.5786        | 201.1234        | 101.0653         |                  |                  | 2  |
| 18 |                 |                 |           |                  |                 |                  | K    | 147.1128         | 74.0600         | 130.0863        | 65.5468          |                  |                  | 1  |

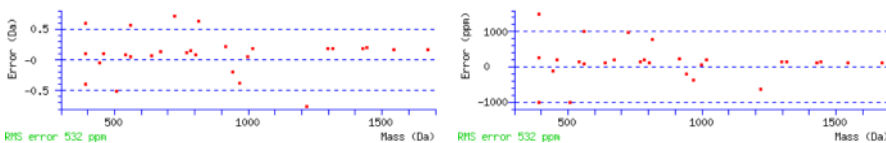

NCBI BLAST search of **TITLEVEPSDTIENVKAK**  
 (Parameters: blastp, nr protein database, expect=20000, no filter, PAM30)  
 Other BLAST [web gateways](#)

All matches to this query

| Score | Mr(calc): | Delta   | Sequence                             |
|-------|-----------|---------|--------------------------------------|
| 27.8  | 2100.0950 | 0.1664  | <a href="#">TITLEVEPSDTIENVKAK</a>   |
| 27.8  | 2100.0950 | 0.1664  | <a href="#">TITLEVEPSDTIENVKAK</a>   |
| 18.9  | 2100.1435 | 0.1180  | <a href="#">NMVVKIPMTVVEGLKAVK</a>   |
| 16.0  | 2100.1136 | 0.1478  | <a href="#">LDILMAEVEDIELSAGRVK</a>  |
| 13.3  | 2098.0782 | 2.1832  | <a href="#">OHGMNSEVVFVIEHLAKK</a>   |
| 13.3  | 2098.0782 | 2.1832  | <a href="#">OHGMNSEVVFVIEHLAKK</a>   |
| 13.1  | 2099.0464 | 1.2150  | <a href="#">SLMMLLENAAKYLPNLMTK</a>  |
| 13.1  | 2099.0464 | 1.2150  | <a href="#">SLMMLLENAAKYLPNLMTK</a>  |
| 13.0  | 2099.0494 | 1.2120  | <a href="#">EAQVKVAEVEGEKVDNK</a>    |
| 12.7  | 2101.1241 | -0.8627 | <a href="#">EIKMGEVANFTIPVVI EGR</a> |

**(MATRIX) Mascot Search Results**  
**(SCIENCE)**

**Peptide View**

MS/MS Fragmentation of **NLLHDNELSDLKEDGGSGGDL SALR**  
Found in **YD\_RFP-BARD-BCRA-Ub**, YD\_RFP-BARD-BCRA-Ub

Match to Query 864: 2739.578172 from(914.200000,3+) intensity(3627246.0000)  
Title: Cmpd 144, +MSn(914.42), 28.6 min  
Data file C:\YaelDavid\100203\_YaelDavid\BIT00814\_YD\_5\_merge.mgf

Click mouse within plot area to zoom in by factor of two about that point  
Or, Plot from 200 to 2600 Da Full range  
Label all possible matches  Label matches used for scoring

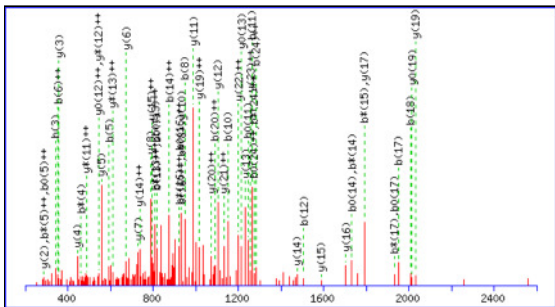

Monoisotopic mass of neutral peptide Mr(calc): 2738.3107  
Fixed modifications: Carbamidomethyl (C) (apply to specified residues or termini only)  
Variable modifications: K12 : GlyGly (K)  
Ions Score: 104 Expect: 7.4e-09  
Matches : 60/274 fragment ions using 75 most intense peaks ([help](#))

| #  | b                | b <sup>++</sup>  | b <sup>*</sup>   | b <sup>*++</sup> | b <sup>0</sup>   | b <sup>0++</sup> | Seq. | y                | y <sup>++</sup>  | y <sup>*</sup> | y <sup>*++</sup> | y <sup>0</sup>   | y <sup>0++</sup> | #  |
|----|------------------|------------------|------------------|------------------|------------------|------------------|------|------------------|------------------|----------------|------------------|------------------|------------------|----|
| 1  | 115.0502         | 58.0287          | 98.0237          | 49.5155          |                  |                  | N    |                  |                  |                |                  |                  |                  | 25 |
| 2  | 228.1343         | 114.5708         | 211.1077         | 106.0575         |                  |                  | L    | 2625.2751        | 1313.1412        | 2608.2485      | 1304.6279        | 2607.2645        | 1304.1359        | 24 |
| 3  | <b>341.2183</b>  | 171.1128         | 324.1918         | 162.5995         |                  |                  | L    | 2512.1910        | <b>1256.5991</b> | 2495.1645      | 1248.0859        | 2494.1804        | 1247.5939        | 23 |
| 4  | 478.2772         | 239.6423         | <b>461.2507</b>  | 231.1290         |                  |                  | H    | 2399.1069        | <b>1200.0571</b> | 2382.0804      | 1191.5438        | 2381.0964        | 1191.0518        | 22 |
| 5  | <b>593.3042</b>  | 297.1557         | 576.2776         | <b>288.6425</b>  | 575.2936         | <b>288.1504</b>  | D    | 2262.0480        | <b>1131.5277</b> | 2245.0215      | 1123.0144        | 2244.0375        | 1122.5224        | 21 |
| 6  | 707.3471         | <b>354.1772</b>  | 690.3206         | 345.6639         | 689.3365         | 345.1719         | N    | 2147.0211        | <b>1074.0142</b> | 2129.9945      | 1065.5009        | 2129.0105        | 1065.0089        | 20 |
| 7  | 836.3897         | 418.6985         | 819.3632         | 410.1852         | <b>818.3791</b>  | 409.6932         | E    | <b>2032.9782</b> | <b>1016.9927</b> | 2015.9516      | 1008.4794        | <b>2014.9676</b> | 1007.9874        | 19 |
| 8  | <b>949.4738</b>  | 475.2405         | <b>932.4472</b>  | 466.7272         | 931.4632         | 466.2352         | L    | 1903.9356        | 952.4714         | 1886.9090      | 943.9582         | 1885.9250        | 943.4661         | 18 |
| 9  | 1036.5058        | 518.7565         | 1019.4792        | 510.2433         | 1018.4952        | 509.7513         | S    | <b>1790.8515</b> | 895.9294         | 1773.8250      | 887.4161         | 1772.8409        | 886.9241         | 17 |
| 10 | <b>1151.5327</b> | 576.2700         | 1134.5062        | 567.7567         | 1133.5222        | 567.2647         | D    | <b>1703.8195</b> | 852.4134         | 1686.7929      | 843.9001         | 1685.8089        | 843.4081         | 16 |
| 11 | <b>1264.6168</b> | 632.8120         | 1247.5903        | 624.2988         | <b>1246.6062</b> | 623.8068         | L    | <b>1588.7925</b> | <b>794.8999</b>  | 1571.7660      | 786.3866         | 1570.7820        | 785.8946         | 15 |
| 12 | <b>1506.7547</b> | 753.8810         | 1489.7281        | 745.3677         | 1488.7441        | 744.8757         | K    | <b>1475.7085</b> | <b>738.3579</b>  | 1458.6819      | 729.8446         | 1457.6979        | 729.3526         | 14 |
| 13 | 1635.7973        | <b>818.4023</b>  | 1618.7707        | <b>809.8890</b>  | 1617.7867        | <b>809.3970</b>  | E    | <b>1233.5706</b> | 617.2889         | 1216.5440      | <b>608.7757</b>  | <b>1215.5600</b> | 608.2836         | 13 |
| 14 | 1750.8242        | <b>875.9158</b>  | <b>1733.7977</b> | 867.4025         | <b>1732.8137</b> | 866.9105         | D    | <b>1104.5280</b> | 552.7676         | 1087.5014      | <b>544.2544</b>  | 1086.5174        | <b>543.7624</b>  | 12 |
| 15 | 1807.8457        | 904.4265         | <b>1790.8191</b> | 895.9132         | 1789.8351        | 895.4212         | G    | <b>989.5010</b>  | 495.2542         | 972.4745       | <b>486.7409</b>  | 971.4905         | 486.2489         | 11 |
| 16 | 1864.8672        | <b>932.9372</b>  | 1847.8406        | <b>924.4239</b>  | 1846.8566        | <b>923.9319</b>  | G    | <b>932.4796</b>  | 466.7434         | 915.4530       | 458.2302         | 914.4690         | 457.7381         | 10 |
| 17 | <b>1951.8992</b> | 976.4532         | <b>1934.8726</b> | 967.9400         | <b>1933.8886</b> | 967.4479         | S    | 875.4581         | 438.2327         | 858.4316       | 429.7194         | 857.4476         | 429.2274         | 9  |
| 18 | <b>2008.9207</b> | 1004.9640        | 1991.8941        | 996.4507         | 1990.9101        | 995.9587         | G    | <b>788.4261</b>  | 394.7167         | 771.3995       | 386.2034         | 770.4155         | 385.7114         | 8  |
| 19 | 2065.9421        | 1033.4747        | 2048.9156        | 1024.9614        | 2047.9315        | 1024.4694        | G    | <b>731.4046</b>  | 366.2060         | 714.3781       | 357.6927         | 713.3941         | 357.2007         | 7  |
| 20 | 2180.9691        | <b>1090.9882</b> | 2163.9425        | 1082.4749        | 2162.9585        | 1081.9829        | D    | <b>674.3832</b>  | 337.6952         | 657.3566       | 329.1819         | 656.3726         | 328.6899         | 6  |
| 21 | 2294.0531        | 1147.5302        | 2277.0266        | 1139.0169        | 2276.0426        | 1138.5249        | L    | <b>559.3562</b>  | 280.1817         | 542.3297       | 271.6685         | 541.3457         | 271.1765         | 5  |
| 22 | 2381.0851        | 1191.0462        | 2364.0586        | 1182.5329        | 2363.0746        | 1182.0409        | S    | <b>446.2722</b>  | 223.6397         | 429.2456       | 215.1264         | 428.2616         | 214.6344         | 4  |
| 23 | 2452.1223        | 1226.5648        | 2435.0957        | 1218.0515        | 2434.1117        | 1217.5595        | A    | <b>359.2401</b>  | 180.1237         | 342.2136       | 171.6104         |                  |                  | 3  |
| 24 | 2565.2063        | <b>1283.1068</b> | 2548.1798        | <b>1274.5935</b> | 2547.1958        | <b>1274.1015</b> | L    | <b>288.2030</b>  | 144.6051         | 271.1765       | 136.0919         |                  |                  | 2  |
| 25 |                  |                  |                  |                  |                  |                  | R    | 175.1190         | 88.0631          | 158.0924       | 79.5498          |                  |                  | 1  |

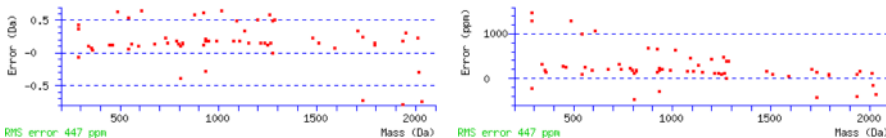

NCBI BLAST search of **NLLHDNELSDLKEDGGSGGDL SALR**  
(Parameters: blastp, nr protein database, expect=20000, no filter, PAM30)  
Other BLAST [web gateways](#)

**All matches to this query**

| Score | Mr(calc): | Delta   | Sequence                                   |
|-------|-----------|---------|--------------------------------------------|
| 104.1 | 2738.3107 | 1.2675  | <a href="#">NLLHDNELSDLKEDGGSGGDL SALR</a> |
| 16.8  | 2739.3571 | 0.2211  | <a href="#">IAAVLDCKTSKAAEVMAAGEGYIK</a>   |
| 14.6  | 2739.3062 | 0.2720  | <a href="#">EGGQVLDITMAIENFISVQETEPEPK</a> |
| 14.6  | 2740.3124 | -0.7343 | <a href="#">SSLASHSSQDQKSHTPRSSISSPR</a>   |
| 14.4  | 2738.2599 | 1.3182  | <a href="#">NKNTEGSMASNPILVMDVEGTDGRER</a> |
| 14.3  | 2739.2156 | 0.3626  | <a href="#">YKGLGEMDPEQLWETITMDPETR</a>    |
| 14.1  | 2739.3533 | 0.2249  | <a href="#">LGFSEVEQVMVVDGKLMVEMEK</a>     |
| 13.9  | 2739.3459 | 0.2323  | <a href="#">NNCIGLMYNALVIDSDESSLIAIK</a>   |
| 13.0  | 2738.3446 | 1.2336  | <a href="#">YERGSNPMTIVKVPDSPPPSPGR</a>    |

|      |           |        |                                           |
|------|-----------|--------|-------------------------------------------|
| 12.9 | 2738.5113 | 1.0669 | <a href="#">IKVTINTAKPGMVIGRQGAGVEELK</a> |
|------|-----------|--------|-------------------------------------------|

|                                                                                          |
|------------------------------------------------------------------------------------------|
| <b>Mascot:</b> <a href="http://www.matrixscience.com/">http://www.matrixscience.com/</a> |
|------------------------------------------------------------------------------------------|

**(MATRIX) (SCIENCE) Mascot Search Results**

**Peptide View**

MS/MS Fragmentation of **LIFAGKQLEDGR**

Found in **YD\_RFP-BARD-BRCA-Ub**, YD\_RFP-BARD-BRCA-Ub

Match to Query 462: 1460.095448 from(731.055000,2+) intensity(5995554.0000)

Title: Cmpd 91, +MSn(731.30), 24.8 min

Data file C:\YaelDavid\100203\_YaelDavid\BIT00814\_YD\_5\_merge.mgf

Click mouse within plot area to zoom in by factor of two about that point

Or, Plot from 200 to 1300 Da Full range

Label all possible matches  Label matches used for scoring

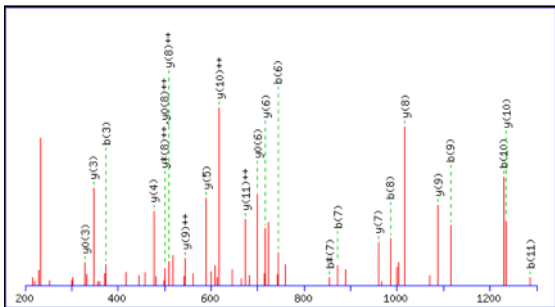

Monoisotopic mass of neutral peptide Mr(calc): 1459.7783

Fixed modifications: Carbamidomethyl (C) (apply to specified residues or termini only)

Variable modifications:

K6 : GlyGly (K)

Ions Score: 71 Expect: 8.9e-05

Matches : 24/102 Fragment ions using 30 most intense peaks [\(help\)](#)

| #  | b         | b <sup>++</sup> | b*        | b <sup>*++</sup> | b <sup>0</sup> | b <sup>0++</sup> | Seq. | y         | y <sup>++</sup> | y*        | y <sup>*++</sup> | y <sup>0</sup> | y <sup>0++</sup> | #  |
|----|-----------|-----------------|-----------|------------------|----------------|------------------|------|-----------|-----------------|-----------|------------------|----------------|------------------|----|
| 1  | 114.0913  | 57.5493         |           |                  |                |                  | L    |           |                 |           |                  |                |                  | 12 |
| 2  | 227.1754  | 114.0913        |           |                  |                |                  | I    | 1347.7015 | 674.3544        | 1330.6750 | 665.8411         | 1329.6910      | 665.3491         | 11 |
| 3  | 374.2438  | 187.6255        |           |                  |                |                  | F    | 1234.6175 | 617.8124        | 1217.5909 | 609.2991         | 1216.6069      | 608.8071         | 10 |
| 4  | 445.2809  | 223.1441        |           |                  |                |                  | A    | 1087.5491 | 544.2782        | 1070.5225 | 535.7649         | 1069.5385      | 535.2729         | 9  |
| 5  | 502.3024  | 251.6548        |           |                  |                |                  | G    | 1016.5119 | 508.7596        | 999.4854  | 500.2463         | 998.5014       | 499.7543         | 8  |
| 6  | 744.4403  | 372.7238        | 727.4137  | 364.2105         |                |                  | K    | 959.4905  | 480.2489        | 942.4639  | 471.7356         | 941.4799       | 471.2436         | 7  |
| 7  | 872.4989  | 436.7531        | 855.4723  | 428.2398         |                |                  | Q    | 717.3526  | 359.1799        | 700.3260  | 350.6667         | 699.3420       | 350.1747         | 6  |
| 8  | 985.5829  | 493.2951        | 968.5564  | 484.7818         |                |                  | L    | 589.2940  | 295.1506        | 572.2675  | 286.6374         | 571.2835       | 286.1454         | 5  |
| 9  | 1114.6255 | 557.8164        | 1097.5990 | 549.3031         | 1096.6150      | 548.8111         | E    | 476.2100  | 238.6086        | 459.1834  | 230.0953         | 458.1994       | 229.6033         | 4  |
| 10 | 1229.6525 | 615.3299        | 1212.6259 | 606.8166         | 1211.6419      | 606.3246         | D    | 347.1674  | 174.0873        | 330.1408  | 165.5740         | 329.1568       | 165.0820         | 3  |
| 11 | 1286.6739 | 643.8406        | 1269.6474 | 635.3273         | 1268.6634      | 634.8353         | G    | 232.1404  | 116.5738        | 215.1139  | 108.0606         |                |                  | 2  |
| 12 |           |                 |           |                  |                |                  | R    | 175.1190  | 88.0631         | 158.0924  | 79.5498          |                |                  | 1  |

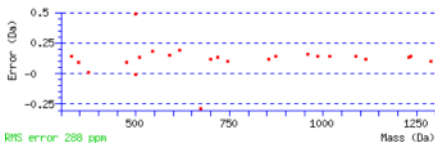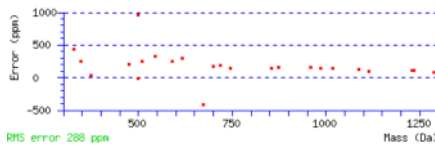

NCBI BLAST search of **LIFAGKQLEDGR**

(Parameters: blastp, nr protein database, expect=20000, no filter, PAM30)

Other BLAST [web gateways](#)

**All matches to this query**

| Score | Mr(calc): | Delta   | Sequence                      |
|-------|-----------|---------|-------------------------------|
| 71.2  | 1459.7783 | 0.3171  | <a href="#">LIFAGKQLEDGR</a>  |
| 27.1  | 1460.7544 | -0.6590 | <a href="#">NIEMQOLELSK</a>   |
| 25.2  | 1460.7471 | -0.6516 | <a href="#">TNTNNTINIESIK</a> |
| 25.2  | 1459.6725 | 0.4229  | <a href="#">EAAALQCQLEDGR</a> |
| 21.9  | 1459.8610 | 0.2345  | <a href="#">TKTKLSVIESIK</a>  |
| 21.9  | 1459.8610 | 0.2345  | <a href="#">TKTKLSVLESIK</a>  |
| 21.3  | 1459.8293 | 0.2662  | <a href="#">LIRMIRTAGALK</a>  |
| 21.2  | 1459.7307 | 0.3648  | <a href="#">ALENALPYLEDGR</a> |
| 18.9  | 1459.8432 | 0.2522  | <a href="#">SGMVTLKLEKIK</a>  |
| 18.7  | 1460.7908 | -0.6954 | <a href="#">TVEMLKAEGIK</a>   |

Mascot: <http://www.matrixscience.com/>







|           |           |           |           |         |   |                        |                             |
|-----------|-----------|-----------|-----------|---------|---|------------------------|-----------------------------|
| 464 - 479 | 894.6940  | 1787.3734 | 1786.9200 | 0.4534  | 0 | K.TITLEVEPSDTIENVK.A   | (Ions score 82)             |
| 464 - 479 | 894.7260  | 1787.4374 | 1786.9200 | 0.5174  | 0 | K.TITLEVEPSDTIENVK.A   | (Ions score 76)             |
| 464 - 481 | 701.7810  | 2102.3212 | 2100.0950 | 2.2262  | 1 | K.TITLEVEPSDTIENVKAK.I | GlyGly (K) (Ions score 44)  |
| 482 - 494 | 762.4400  | 1522.8654 | 1522.7740 | 0.0915  | 1 | K.IQDKREGIPPDQQR.L     | (Ions score 55)             |
| 482 - 494 | 762.4440  | 1522.8734 | 1522.7740 | 0.0995  | 1 | K.IQDKREGIPPDQQR.L     | (Ions score 62)             |
| 482 - 494 | 762.4540  | 1522.8934 | 1522.7740 | 0.1195  | 1 | K.IQDKREGIPPDQQR.L     | (Ions score 58)             |
| 482 - 494 | 762.4650  | 1522.9154 | 1522.7740 | 0.1415  | 1 | K.IQDKREGIPPDQQR.L     | (Ions score 63)             |
| 482 - 494 | 762.4730  | 1522.9314 | 1522.7740 | 0.1575  | 1 | K.IQDKREGIPPDQQR.L     | (Ions score 55)             |
| 482 - 494 | 762.4750  | 1522.9354 | 1522.7740 | 0.1615  | 1 | K.IQDKREGIPPDQQR.L     | (Ions score 48)             |
| 486 - 494 | 520.2600  | 1038.5054 | 1038.5094 | -0.0040 | 0 | K.EGIPPDQQR.L          | (Ions score 31)             |
| 486 - 494 | 520.2890  | 1038.5634 | 1038.5094 | 0.0540  | 0 | K.EGIPPDQQR.L          | (Ions score 28)             |
| 486 - 494 | 520.3020  | 1038.5894 | 1038.5094 | 0.0800  | 0 | K.EGIPPDQQR.L          | (Ions score 30)             |
| 486 - 494 | 520.3150  | 1038.6154 | 1038.5094 | 0.1060  | 0 | K.EGIPPDQQR.L          | (Ions score 31)             |
| 486 - 494 | 520.3200  | 1038.6254 | 1038.5094 | 0.1160  | 0 | K.EGIPPDQQR.L          | (Ions score 29)             |
| 486 - 494 | 520.3580  | 1038.7014 | 1038.5094 | 0.1920  | 0 | K.EGIPPDQQR.L          | (Ions score 32)             |
| 486 - 494 | 520.3600  | 1038.7054 | 1038.5094 | 0.1960  | 0 | K.EGIPPDQQR.L          | (Ions score 30)             |
| 486 - 494 | 520.3650  | 1038.7154 | 1038.5094 | 0.2060  | 0 | K.EGIPPDQQR.L          | (Ions score 28)             |
| 495 - 506 | 487.3360  | 1458.9862 | 1459.7783 | -0.7921 | 1 | R.LIFAGKQLEDGR.T       | GlyGly (K) (Ions score 39)  |
| 495 - 506 | 487.6810  | 1460.0212 | 1459.7783 | 0.2429  | 1 | R.LIFAGKQLEDGR.T       | GlyGly (K) (Ions score 42)  |
| 507 - 515 | 541.3500  | 1080.6854 | 1080.5451 | 0.1403  | 0 | R.TLSDYNIQK.E          | (Ions score 58)             |
| 507 - 515 | 541.3510  | 1080.6874 | 1080.5451 | 0.1423  | 0 | R.TLSDYNIQK.E          | (Ions score 63)             |
| 507 - 515 | 541.3560  | 1080.6974 | 1080.5451 | 0.1523  | 0 | R.TLSDYNIQK.E          | (Ions score 63)             |
| 507 - 515 | 541.3890  | 1080.7634 | 1080.5451 | 0.2183  | 0 | R.TLSDYNIQK.E          | (Ions score 63)             |
| 507 - 515 | 541.4070  | 1080.7994 | 1080.5451 | 0.2543  | 0 | R.TLSDYNIQK.E          | (Ions score 33)             |
| 507 - 524 | 1122.6910 | 2243.3674 | 2243.1910 | 0.1765  | 1 | R.TLSDYNIQKESTLHLVLR.L | GlyGly (K) (Ions score 101) |
| 507 - 524 | 1122.7160 | 2243.4174 | 2243.1910 | 0.2265  | 1 | R.TLSDYNIQKESTLHLVLR.L | GlyGly (K) (Ions score 84)  |
| 507 - 524 | 748.8980  | 2243.6722 | 2243.1910 | 0.4812  | 1 | R.TLSDYNIQKESTLHLVLR.L | GlyGly (K) (Ions score 75)  |
| 507 - 524 | 748.9500  | 2243.8282 | 2243.1910 | 0.6372  | 1 | R.TLSDYNIQKESTLHLVLR.L | GlyGly (K) (Ions score 78)  |
| 507 - 524 | 1123.2170 | 2244.4194 | 2243.1910 | 1.2285  | 1 | R.TLSDYNIQKESTLHLVLR.L | GlyGly (K) (Ions score 101) |
| 516 - 524 | 533.8360  | 1066.6574 | 1066.6135 | -0.9560 | 0 | K.ESTLHLVLR.L          | (Ions score 64)             |
| 516 - 524 | 534.3830  | 1066.7514 | 1066.6135 | 0.1380  | 0 | K.ESTLHLVLR.L          | (Ions score 62)             |
| 516 - 524 | 534.3950  | 1066.7754 | 1066.6135 | 0.1620  | 0 | K.ESTLHLVLR.L          | (Ions score 77)             |
| 516 - 524 | 534.3960  | 1066.7774 | 1066.6135 | 0.1640  | 0 | K.ESTLHLVLR.L          | (Ions score 64)             |
| 516 - 524 | 534.4340  | 1066.8534 | 1066.6135 | 0.2400  | 0 | K.ESTLHLVLR.L          | (Ions score 63)             |
| 516 - 524 | 534.5160  | 1067.0174 | 1066.6135 | 0.4040  | 0 | K.ESTLHLVLR.L          | (Ions score 22)             |

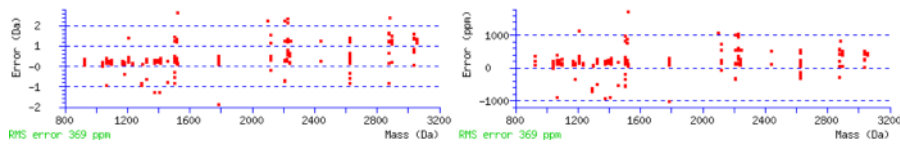

Masscot: <http://www.matrixscience.com/>

**MASCOT** **SCIENCE** Mascot Search Results

Peptide View

MS/MS Fragmentation of **TITLEVEPSDTIENVKAK**  
 Found in **YD\_RFP-p53-Ub**, **YD\_RFP-p53-Ub**

Match to Query 693: 2102.321172 from(701.781000,3+) intensity(392304.0000)  
 Title: Cmpd 93, +MSn(702.69), 26.4 min  
 Data file C:\YaelDavid\100203\_YaelDavid\BIT00816\_YD\_6\_merge.mgf

Click mouse within plot area to zoom in by factor of two about that point

Or, Plot from 200 to 1000 Da Full range  
 Label all possible matches  Label matches used for scoring

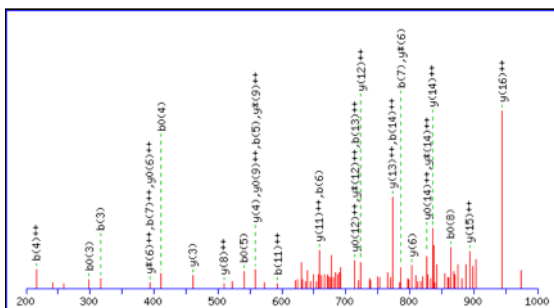

Monoisotopic mass of neutral peptide **Mr(calc)**: 2100.0950  
**Fixed modifications**: Carbamidomethyl (C) (apply to specified residues or termini only)  
**Variable modifications**:  
 K16 : GlyGly (K)  
**Ions Score**: 44 **Expect**: 0.37  
**Matches** : 33/168 fragment ions using 31 most intense peaks ([help](#))

| #  | b               | b <sup>++</sup> | b <sup>*</sup> | b <sup>*++</sup> | b <sup>0</sup>  | b <sup>0++</sup> | Seq. | y               | y <sup>++</sup> | y <sup>*</sup>  | y <sup>*++</sup> | y <sup>0</sup> | y <sup>0++</sup> | #  |
|----|-----------------|-----------------|----------------|------------------|-----------------|------------------|------|-----------------|-----------------|-----------------|------------------|----------------|------------------|----|
| 1  | 102.0550        | 51.5311         |                |                  | 84.0444         | 42.5258          | T    |                 |                 |                 |                  |                |                  | 18 |
| 2  | <b>215.1390</b> | 108.0731        |                |                  | 197.1285        | 99.0679          | I    | 2000.0546       | 1000.5310       | 1983.0281       | 992.0177         | 1982.0441      | 991.5257         | 17 |
| 3  | <b>316.1867</b> | 158.5970        |                |                  | <b>298.1761</b> | 149.5917         | T    | 1886.9706       | <b>943.9889</b> | 1869.9440       | 935.4756         | 1868.9600      | 934.9836         | 16 |
| 4  | 429.2708        | <b>215.1390</b> |                |                  | <b>411.2602</b> | 206.1337         | L    | 1785.9229       | <b>893.4651</b> | 1768.8963       | 884.9518         | 1767.9123      | 884.4598         | 15 |
| 5  | <b>558.3134</b> | 279.6603        |                |                  | <b>540.3028</b> | 270.6550         | E    | 1672.8388       | <b>836.9230</b> | 1655.8123       | <b>828.4098</b>  | 1654.8283      | <b>827.9178</b>  | 14 |
| 6  | <b>657.3818</b> | 329.1945        |                |                  | 639.3712        | 320.1892         | V    | 1543.7962       | <b>772.4018</b> | 1526.7697       | 763.8885         | 1525.7857      | 763.3965         | 13 |
| 7  | <b>786.4244</b> | <b>393.7158</b> |                |                  | 768.4138        | 384.7105         | E    | 1444.7278       | <b>722.8675</b> | 1427.7013       | <b>714.3543</b>  | 1426.7172      | <b>713.8623</b>  | 12 |
| 8  | 883.4771        | 442.2422        |                |                  | <b>865.4666</b> | 433.2369         | P    | 1315.6852       | <b>658.3462</b> | 1298.6587       | 649.8330         | 1297.6747      | 649.3410         | 11 |
| 9  | 970.5092        | 485.7582        |                |                  | 952.4986        | 476.7529         | S    | 1218.6325       | 609.8199        | 1201.6059       | 601.3066         | 1200.6219      | 600.8146         | 10 |
| 10 | 1085.5361       | 543.2717        |                |                  | 1067.5255       | 534.2664         | D    | 1131.6004       | 566.3039        | 1114.5739       | <b>557.7906</b>  | 1113.5899      | <b>557.2986</b>  | 9  |
| 11 | 1186.5838       | <b>593.7955</b> |                |                  | 1168.5732       | 584.7902         | T    | 1016.5735       | <b>508.7904</b> | 999.5469        | 500.2771         | 998.5629       | 499.7851         | 8  |
| 12 | 1299.6678       | 650.3376        |                |                  | 1281.6573       | 641.3323         | I    | 915.5258        | 458.2665        | 898.4993        | 449.7533         | 897.5152       | 449.2613         | 7  |
| 13 | 1428.7104       | <b>714.8589</b> |                |                  | 1410.6999       | 705.8536         | E    | <b>802.4417</b> | 401.7245        | <b>785.4152</b> | <b>393.2112</b>  | 784.4312       | <b>392.7192</b>  | 6  |
| 14 | 1542.7534       | <b>771.8803</b> | 1525.7268      | 763.3670         | 1524.7428       | 762.8750         | N    | 673.3991        | 337.2032        | 656.3726        | 328.6899         |                |                  | 5  |
| 15 | 1641.8218       | 821.4145        | 1624.7952      | 812.9013         | 1623.8112       | 812.4092         | V    | <b>559.3562</b> | 280.1817        | 542.3297        | 271.6685         |                |                  | 4  |
| 16 | 1883.9597       | 942.4835        | 1866.9331      | 933.9702         | 1865.9491       | 933.4782         | K    | <b>460.2878</b> | 230.6475        | 443.2613        | 222.1343         |                |                  | 3  |
| 17 | 1954.9968       | 978.0020        | 1937.9702      | 969.4888         | 1936.9862       | 968.9967         | A    | 218.1499        | 109.5786        | 201.1234        | 101.0653         |                |                  | 2  |
| 18 |                 |                 |                |                  |                 |                  | K    | 147.1128        | 74.0600         | 130.0863        | 65.5468          |                |                  | 1  |

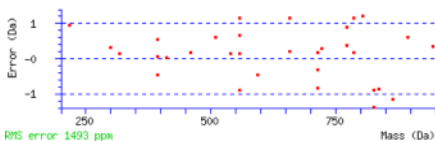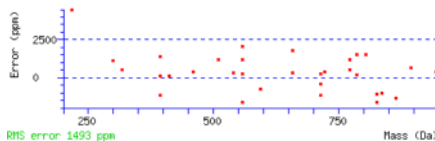

NCBI BLAST search of **TITLEVEPSDTIENVKAK**  
 (Parameters: blastp, nr protein database, expect=20000, no filter, PAM30)  
 Other BLAST [web gateways](#)

All matches to this query

| Score | Mr(calc): | Delta   | Sequence                              |
|-------|-----------|---------|---------------------------------------|
| 48.7  | 2104.0874 | -1.7662 | <a href="#">RYLIDKGLVPMEGDEELK</a>    |
| 47.0  | 2101.0772 | 1.2440  | <a href="#">NVSMQNAVNEPVQKLMRK</a>    |
| 44.4  | 2100.0950 | 2.2262  | <a href="#">TITLEVEPSDTIENVKAK</a>    |
| 44.4  | 2100.0950 | 2.2262  | <a href="#">TITLEVEPSDTIENVKAK</a>    |
| 44.3  | 2100.1361 | 2.1851  | <a href="#">DVITELIAKLGENMNLRR</a>    |
| 43.5  | 2101.2081 | 1.1131  | <a href="#">RGRPEALYKLMVEIGIK</a>     |
| 42.2  | 2101.1280 | 1.1932  | <a href="#">TLTLEAGRFAEQANGAVVVR</a>  |
| 42.0  | 2102.0831 | 0.2381  | <a href="#">ITCGQVITGLAPXIPFLRTG</a>  |
| 40.7  | 2102.0491 | 0.2721  | <a href="#">RASEKSGLELDIESSOPLK</a>   |
| 40.4  | 2101.0804 | 1.2408  | <a href="#">GPVSRITFVLGASADSPELGK</a> |

**MASCOT** **SCIENCE** Mascot Search Results

Peptide View

MS/MS Fragmentation of **LIFAGKQLEDGR**

Found in **YD\_RFP-BARD-BRCA-Ub**, YD\_RFP-BARD-BRCA-Ub

Match to Query 426: 1460.021172 from(487.681000,3+) intensity(2549566.0000)

Title: Cmpd 73, +MSn(487.77), 24.3 min

Data file C:\YaelDavid\100203\_YaelDavid\BIT00816\_YD\_6\_merge.mgf

Click mouse within plot area to zoom in by factor of two about that point

Or, Plot from 200 to 1050 Da Full range

Label all possible matches  Label matches used for scoring

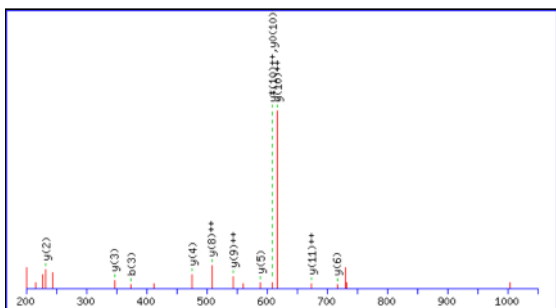

Monoisotopic mass of neutral peptide Mr(calc): 1459.7783

Fixed modifications: Carbamidomethyl (C) (apply to specified residues or termini only)

Variable modifications:

K6 : GlyGly (K)

Ions Score: 42 Expect: 0.72

Matches : 12/102 Fragment ions using 17 most intense peaks [\(help\)](#)

| #  | b         | b <sup>++</sup> | b*        | b <sup>++</sup> | b <sup>0</sup> | b <sup>0++</sup> | Seq. | y         | y <sup>++</sup> | y*        | y <sup>++</sup> | y <sup>0</sup> | y <sup>0++</sup> | #  |
|----|-----------|-----------------|-----------|-----------------|----------------|------------------|------|-----------|-----------------|-----------|-----------------|----------------|------------------|----|
| 1  | 114.0913  | 57.5493         |           |                 |                |                  | L    |           |                 |           |                 |                |                  | 12 |
| 2  | 227.1754  | 114.0913        |           |                 |                |                  | I    | 1347.7015 | 674.3544        | 1330.6750 | 665.8411        | 1329.6910      | 665.3491         | 11 |
| 3  | 374.2438  | 187.6255        |           |                 |                |                  | F    | 1234.6175 | 617.8124        | 1217.5909 | 609.2991        | 1216.6069      | 608.8071         | 10 |
| 4  | 445.2809  | 223.1441        |           |                 |                |                  | A    | 1087.5491 | 544.2782        | 1070.5225 | 535.7649        | 1069.5385      | 535.2729         | 9  |
| 5  | 502.3024  | 251.6548        |           |                 |                |                  | G    | 1016.5119 | 508.7596        | 999.4854  | 500.2463        | 998.5014       | 499.7543         | 8  |
| 6  | 744.4403  | 372.7238        | 727.4137  | 364.2105        |                |                  | K    | 959.4905  | 480.2489        | 942.4639  | 471.7356        | 941.4799       | 471.2436         | 7  |
| 7  | 872.4989  | 436.7531        | 855.4723  | 428.2398        |                |                  | Q    | 717.3526  | 359.1799        | 700.3260  | 350.6667        | 699.3420       | 350.1747         | 6  |
| 8  | 985.5829  | 493.2951        | 968.5564  | 484.7818        |                |                  | L    | 589.2940  | 295.1506        | 572.2675  | 286.6374        | 571.2835       | 286.1454         | 5  |
| 9  | 1114.6255 | 557.8164        | 1097.5990 | 549.3031        | 1096.6150      | 548.8111         | E    | 476.2100  | 238.6086        | 459.1834  | 230.0953        | 458.1994       | 229.6033         | 4  |
| 10 | 1229.6525 | 615.3299        | 1212.6259 | 606.8166        | 1211.6419      | 606.3246         | D    | 347.1674  | 174.0873        | 330.1408  | 165.5740        | 329.1568       | 165.0820         | 3  |
| 11 | 1286.6739 | 643.8406        | 1269.6474 | 635.3273        | 1268.6634      | 634.8353         | G    | 332.1404  | 116.5738        | 215.1139  | 108.0606        |                |                  | 2  |
| 12 |           |                 |           |                 |                |                  | R    | 175.1190  | 88.0631         | 158.0924  | 79.5498         |                |                  | 1  |

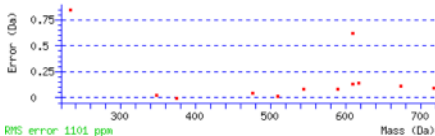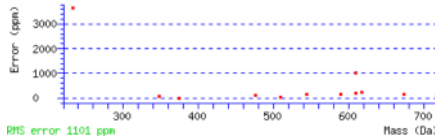

NCBI BLAST search of **LIFAGKQLEDGR**

(Parameters: blastp, nr protein database, expect=20000, no filter, PAM30)

Other BLAST [web gateways](#)

All matches to this query

| Score | Mr(calc): | Delta   | Sequence                        |
|-------|-----------|---------|---------------------------------|
| 47.6  | 1460.7116 | -0.6904 | <a href="#">LNGGLGTTMGCVGPK</a> |
| 42.2  | 1461.7034 | -1.6823 | <a href="#">IGGNDKQGFPMK</a>    |
| 42.1  | 1459.7783 | 0.2429  | <a href="#">LIFAGKQLEDGR</a>    |
| 38.8  | 1460.6743 | -0.6532 | <a href="#">NGGDVTVAGSDDLK</a>  |
| 36.7  | 1460.7147 | -0.6935 | <a href="#">DIGSAVFPDADLK</a>   |
| 34.8  | 1458.8558 | 1.1654  | <a href="#">NLDLKKGFQIK</a>     |
| 34.8  | 1459.8398 | 0.1813  | <a href="#">LIIGDKEIFGISR</a>   |
| 34.5  | 1460.6201 | -0.5990 | <a href="#">AEMDRESEHVK</a>     |
| 34.4  | 1460.7374 | -0.7162 | <a href="#">LLFTYQMTYPGK</a>    |
| 33.1  | 1458.8082 | 1.2129  | <a href="#">FPETSGIGIKPVSK</a>  |

Mascot: <http://www.matrixscience.com/>

**(MATRIX) (SCIENCE) Mascot Search Results**

**Peptide View**

MS/MS Fragmentation of **TLSDYNIQKESTLHLVLR**  
 Found in **YD\_RFP-BARD-BRCA-Ub**, YD\_RFP-BARD-BRCA-Ub

Match to Query 786: 2243.367448 from(1122.691000,2+) intensity(21048710.0000)  
 Title: Cmpd 103, +MSn(1123.27), 27.3 min  
 Data file C:\YaelDavid\100203\_YaelDavid\BIT00816\_YD\_6\_merge.mgf

Click mouse within plot area to zoom in by factor of two about that point

Or, Plot from 200 to 3200 Da Full range

Label all possible matches  Label matches used for scoring

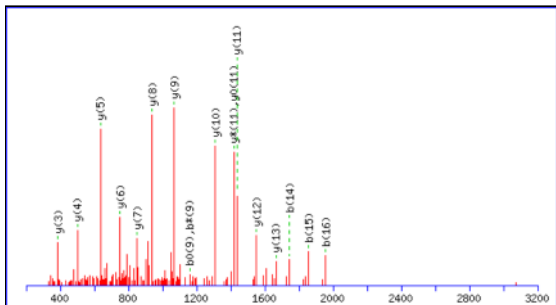

Monoisotopic mass of neutral peptide Mr(calc): 2243.1910  
 Fixed modifications: Carbamidomethyl (C) (apply to specified residues or termini only)  
 Variable modifications:  
 K9 : GlyGly (K)  
 Ions Score: 101 Expect: 7.2e-07  
 Matches : 18/182 fragment ions using 17 most intense peaks ([help](#))

| #  | b                | b <sup>++</sup> | b*               | b <sup>+++</sup> | b <sup>0</sup>   | b <sup>0++</sup> | Seq. | y                | y <sup>++</sup> | y*               | y <sup>+++</sup> | y <sup>0</sup>   | y <sup>0++</sup> | #  |
|----|------------------|-----------------|------------------|------------------|------------------|------------------|------|------------------|-----------------|------------------|------------------|------------------|------------------|----|
| 1  | 102.0550         | 51.5311         |                  |                  | 84.0444          | 42.5258          | T    |                  |                 |                  |                  |                  |                  | 18 |
| 2  | 215.1390         | 108.0731        |                  |                  | 197.1285         | 99.0679          | L    | 2143.1506        | 1072.0789       | 2126.1240        | 1063.5657        | 2125.1400        | 1063.0737        | 17 |
| 3  | 302.1710         | 151.5892        |                  |                  | 284.1605         | 142.5839         | S    | 2030.0665        | 1015.5369       | 2013.0400        | 1007.0236        | 2012.0560        | 1006.5316        | 16 |
| 4  | 417.1980         | 209.1026        |                  |                  | 399.1874         | 200.0974         | D    | 1943.0345        | 972.0209        | 1926.0080        | 963.5076         | 1925.0239        | 963.0156         | 15 |
| 5  | 580.2613         | 290.6343        |                  |                  | 562.2508         | 281.6290         | Y    | 1828.0076        | 914.5074        | 1810.9810        | 905.9941         | 1809.9970        | 905.5021         | 14 |
| 6  | 694.3042         | 347.6558        | 677.2777         | 339.1425         | 676.2937         | 338.6505         | N    | <b>1664.9442</b> | 832.9758        | 1647.9177        | 824.4625         | 1646.9337        | 823.9705         | 13 |
| 7  | 807.3883         | 404.1978        | 790.3618         | 395.6845         | 789.3777         | 395.1925         | I    | <b>1550.9013</b> | 775.9543        | 1533.8748        | 767.4410         | 1532.8907        | 766.9490         | 12 |
| 8  | 935.4469         | 468.2271        | 918.4203         | 459.7138         | 917.4363         | 459.2218         | Q    | <b>1437.8172</b> | 719.4123        | <b>1420.7907</b> | 710.8990         | <b>1419.8067</b> | 710.4070         | 11 |
| 9  | 1177.5848        | 589.2960        | <b>1160.5582</b> | 580.7828         | <b>1159.5742</b> | 580.2907         | K    | <b>1309.7587</b> | 655.3830        | 1292.7321        | 646.8697         | 1291.7481        | 646.3777         | 10 |
| 10 | 1306.6274        | 653.8173        | 1289.6008        | 645.3040         | 1288.6168        | 644.8120         | E    | <b>1067.6208</b> | 534.3140        | 1050.5942        | 525.8007         | 1049.6102        | 525.3087         | 9  |
| 11 | 1393.6594        | 697.3333        | 1376.6329        | 688.8201         | 1375.6488        | 688.3281         | S    | <b>938.5762</b>  | 469.7927        | 921.5516         | 461.2795         | 920.5676         | 460.7874         | 8  |
| 12 | 1494.7071        | 747.8572        | 1477.6805        | 739.3439         | 1476.6965        | 738.8519         | T    | <b>851.5461</b>  | 426.2767        | 834.5196         | 417.7634         | 833.5356         | 417.2714         | 7  |
| 13 | 1607.7911        | 804.3992        | 1590.7646        | 795.8859         | 1589.7806        | 795.3939         | L    | <b>750.4985</b>  | 375.7529        | 733.4719         | 367.2396         |                  |                  | 6  |
| 14 | <b>1744.8501</b> | 872.9287        | 1727.8235        | 864.4154         | 1726.8395        | 863.9234         | H    | <b>637.4144</b>  | 319.2108        | 620.3879         | 310.6976         |                  |                  | 5  |
| 15 | <b>1857.9341</b> | 929.4707        | 1840.9076        | 920.9574         | 1839.9236        | 920.4654         | L    | <b>500.3555</b>  | 250.6814        | 483.3289         | 242.1681         |                  |                  | 4  |
| 16 | <b>1957.0025</b> | 979.0049        | 1939.9760        | 970.4916         | 1938.9920        | 969.9996         | V    | <b>387.2714</b>  | 194.1394        | 370.2449         | 185.6261         |                  |                  | 3  |
| 17 | 2070.0866        | 1035.5469       | 2053.0600        | 1027.0337        | 2052.0760        | 1026.5417        | L    | 288.2030         | 144.6051        | 271.1765         | 136.0919         |                  |                  | 2  |
| 18 |                  |                 |                  |                  |                  |                  | R    | 175.1190         | 88.0631         | 158.0924         | 79.5498          |                  |                  | 1  |

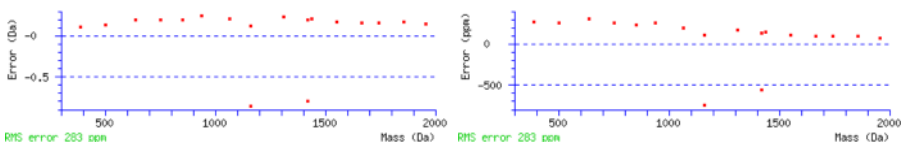

NCBI BLAST search of **TLSDYNIQKESTLHLVLR**  
 (Parameters: blastp, nr protein database, expect=20000, no filter, PAM30)  
 Other BLAST [web gateways](#)

**All matches to this query**

| Score | Mr(calc): | Delta  | Sequence                               |
|-------|-----------|--------|----------------------------------------|
| 101.3 | 2243.1910 | 0.1765 | <a href="#">TLSDYNIQKESTLHLVLR</a>     |
| 42.0  | 2242.1416 | 1.2259 | <a href="#">YGENVPIMAIASLRPPDVER</a>   |
| 36.6  | 2242.2507 | 1.1167 | <a href="#">LNAAIIGPGNIGTDLMYKILR</a>  |
| 36.6  | 2243.2247 | 0.1428 | <a href="#">GGVREVLASEALHHLGVRTSR</a>  |
| 32.1  | 2241.1535 | 2.2139 | <a href="#">GLDTHLSLAAAKEIEMSR LQR</a> |
| 31.0  | 2242.2321 | 1.1353 | <a href="#">LTAGGKSLPIGVTEVQGEFAR</a>  |
| 30.8  | 2243.0416 | 0.3259 | <a href="#">LEELMRQFDEIEDEYLR</a>      |
| 30.7  | 2243.1514 | 0.2160 | <a href="#">IKELQINVQKELNLCMNR</a>     |
| 30.7  | 2243.0917 | 0.2757 | <a href="#">GSADYKDTLTKGSSLSLTPSK</a>  |
| 29.3  | 2241.0340 | 2.3334 | <a href="#">AGCPMADMISGAELREFKSR</a>   |





(MATRIX) Mascot Search Results (SCIENCE)

Protein View

Match to: YD\_RFP-BARD-BCRA-Ub Score: 4958

YD\_RFP-BARD-BCRA-Ub

Found in search of C:\YaelDavid\100203\_YaelDavid\BIT00822\_YD\_9\_merge.mgf

Nominal mass (M<sub>r</sub>): 60628; Calculated pI value: 6.10

NCBI BLAST search of YD\_RFP-BARD-BCRA-Ub against nr

Unformatted sequence string for pasting into other applications

Fixed modifications: Carbamidomethyl (C)

Variable modifications: GlyGly (K), Oxidation (M)

Cleavage by Trypsin: cuts C-term side of KR unless next residue is P

Sequence Coverage: 54%

Matched peptides shown in Bold Red

1 MHHHHHHASS EDVKEFMRF KVRMEGVSNG HEFEIEGEGE GRPYEGTQTA
51 KLKVTKGGPL PFAMWLLSPQ FQYGSKAYVK HPADIPDYLK LSFPEGFKWE
101 RVMNFEDGGV VVTQDSSLQ DGEFIIYKVKL RGTNFPDGGP VMKRKTGMWE
151 ASERMYPSD GALKGEIKMR LKLDGGHYD AENVKTYMAK KPVQLPGAYK
201 TDIKLDITSH NEDYTVIVEQY ERAEGRHSYG ABNLLYFQGLE EPGDGRGAWAH
251 SRANRLREK LTRCSAGWI LRPEVCLGCI EHFYFSCNVS DCIHTGCPVC
301 VTPAWIQDLK INRQDLSMIQ LCSKLRNLLH DNELSDIKED GSGGSDLSAL
351 RVEEVQNVIN AMQKILECPI CLEELKEPVS TKCDHPFCKP CMLKLLNQKK
401 GFSQCPCLKN DITKRSIQES TRFSQIAVERL LKLCARQLD TGLEVANSYN
451 FAKQIFVKTL TGRKTIIEVE PSTDIENVKA KIQDKREGIPP DQQRILFAGK
501 QLEDGRITLD YNIQKRESLH LVLRLRGG

Show predicted peptides also

Sort Peptides By \* Residue Number Increasing Mass Decreasing Mass

Table with columns: Start, End, Observed, Mr (expt), Mr (calc), Delta, Miss, Sequence. Contains peptide search results with ion scores and modifications.





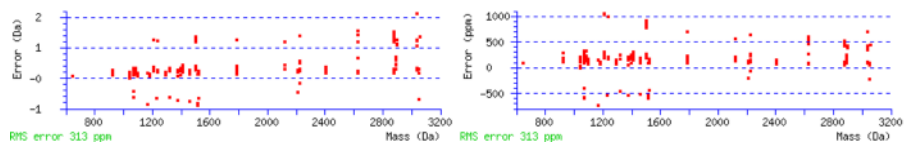

Mascot: <http://www.matrixscience.com/>

**MASCOT** Mascot Search Results

Peptide View

MS/MS Fragmentation of **TLTGKTITLEVEPSDTIENVK**  
 Found in **YD\_RFP-BARD-BRCA-Ub**, YD\_RFP-BARD-BRCA-Ub

Match to Query 837: 2401.435448 from(1201.725000,2+) intensity(1129620,3000)  
 Title: Cmpd 117, +MSn(1202.39), 27.1 min  
 Data file C:\YaelDavid\100203\_YaelDavid\BIT00822\_YD\_9\_merge.mgf

Click mouse within plot area to zoom in by factor of two about that point

Or, Plot from 300 to 1800 Da Full range  
 Label all possible matches  Label matches used for scoring

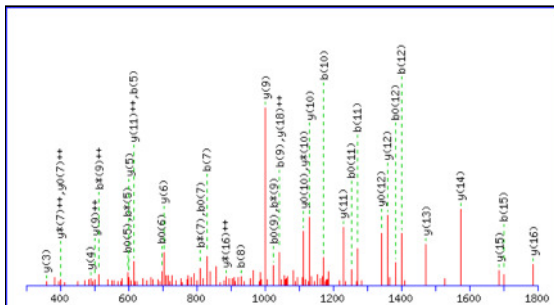

Monoisotopic mass of neutral peptide Mr(calc): 2401.2588  
 Fixed modifications: Carbamidomethyl (C) (apply to specified residues or termini only)  
 Variable modifications:  
 K5 : GlyGly (K)  
 Ions Score: 97 Expect: 9.2e-08  
 Matches : 39/226 fragment ions using 39 most intense peaks ([help](#))

| #  | b                | b <sup>++</sup> | b <sup>*</sup>   | b <sup>*++</sup> | b <sup>0</sup>   | b <sup>0++</sup> | Seq. | y                | y <sup>++</sup> | y <sup>*</sup>   | y <sup>*++</sup> | y <sup>0</sup>   | y <sup>0++</sup> | #  |
|----|------------------|-----------------|------------------|------------------|------------------|------------------|------|------------------|-----------------|------------------|------------------|------------------|------------------|----|
| 1  | 102.0550         | 51.5311         |                  |                  | 84.0444          | 42.5258          | T    |                  |                 |                  |                  |                  |                  | 21 |
| 2  | 215.1390         | 108.0731        |                  |                  | 197.1285         | 99.0679          | L    | 2301.2184        | 1151.1128       | 2284.1918        | 1142.5996        | 2283.2078        | 1142.1076        | 20 |
| 3  | 316.1867         | 158.5970        |                  |                  | 298.1761         | 149.5917         | T    | 2188.1343        | 1094.5708       | 2171.1078        | 1086.0575        | 2170.1238        | 1085.5655        | 19 |
| 4  | 373.2082         | 187.1077        |                  |                  | 355.1976         | 178.1024         | G    | 2087.0867        | 1044.0470       | 2070.0601        | 1035.5337        | 2069.0761        | 1035.0417        | 18 |
| 5  | <b>615.3461</b>  | 308.1767        | <b>598.3195</b>  | 299.6634         | <b>597.3355</b>  | 299.1714         | K    | 2030.0652        | 1015.5362       | 2013.0386        | 1007.0230        | 2012.0546        | 1006.5310        | 17 |
| 6  | 716.3937         | 358.7005        | 699.3672         | 350.1872         | <b>698.3832</b>  | 349.6952         | T    | <b>1787.9273</b> | 894.4673        | 1770.9008        | <b>885.9540</b>  | 1769.9167        | 885.4620         | 16 |
| 7  | <b>829.4778</b>  | 415.2425        | <b>812.4512</b>  | 406.7293         | <b>811.4672</b>  | 406.2373         | I    | <b>1686.8796</b> | 843.9434        | 1669.8531        | 835.4302         | 1668.8691        | 834.9382         | 15 |
| 8  | <b>930.5255</b>  | 465.7664        | 913.4989         | 457.2531         | 912.5149         | 456.7611         | T    | <b>1573.7956</b> | 787.4014        | 1556.7690        | 778.8881         | 1555.7850        | 778.3961         | 14 |
| 9  | <b>1043.6095</b> | 522.3084        | <b>1026.5830</b> | <b>513.7951</b>  | <b>1025.5990</b> | 513.3031         | L    | <b>1472.7479</b> | 736.8776        | 1455.7213        | 728.3643         | 1454.7373        | 727.8723         | 13 |
| 10 | <b>1172.6521</b> | 586.8297        | 1155.6256        | 578.3164         | 1154.6416        | 577.8244         | E    | <b>1359.6638</b> | 680.3355        | 1342.6373        | 671.8223         | <b>1341.6533</b> | 671.3303         | 12 |
| 11 | <b>1271.7205</b> | 636.3639        | 1254.6940        | 627.8506         | <b>1253.7100</b> | 627.3586         | V    | <b>1230.6212</b> | <b>615.8142</b> | 1213.5947        | 607.3010         | 1212.6107        | 606.8090         | 11 |
| 12 | <b>1400.7631</b> | 700.8852        | 1383.7366        | 692.3719         | <b>1382.7526</b> | 691.8799         | E    | <b>1131.5528</b> | 566.2800        | <b>1114.5263</b> | 557.7668         | <b>1113.5422</b> | 557.2748         | 10 |
| 13 | 1497.8159        | 749.4116        | 1480.7894        | 740.8983         | 1479.8053        | 740.4063         | P    | <b>1002.5102</b> | <b>501.7587</b> | 985.4837         | 493.2455         | 984.4997         | 492.7535         | 9  |
| 14 | 1584.8479        | 792.9276        | 1567.8214        | 784.4143         | 1566.8374        | 783.9223         | S    | 905.4575         | 453.2324        | 888.4309         | 444.7191         | 887.4469         | 444.2271         | 8  |
| 15 | <b>1699.8749</b> | 850.4411        | 1682.8483        | 841.9278         | 1681.8643        | 841.4358         | D    | 818.4254         | 409.7163        | 801.3989         | <b>401.2031</b>  | 800.4149         | <b>400.7111</b>  | 7  |
| 16 | 1800.9226        | 900.9649        | 1783.8960        | 892.4516         | 1782.9120        | 891.9596         | T    | <b>703.3985</b>  | 352.2029        | 686.3719         | 343.6896         | 685.3879         | 343.1976         | 6  |
| 17 | 1914.0066        | 957.5069        | 1896.9801        | 948.9937         | 1895.9961        | 948.5017         | I    | <b>602.3508</b>  | 301.6790        | 585.3243         | 293.1658         | 584.3402         | 292.6738         | 5  |
| 18 | 2043.0492        | 1022.0282       | 2026.0227        | 1013.5150        | 2025.0386        | 1013.0230        | E    | <b>489.2667</b>  | 245.1370        | 472.2402         | 236.6237         | 471.2562         | 236.1317         | 4  |
| 19 | 2157.0921        | 1079.0497       | 2140.0656        | 1070.5364        | 2139.0816        | 1070.0444        | N    | <b>360.2241</b>  | 180.6157        | 343.1976         | 172.1024         |                  |                  | 3  |
| 20 | 2256.1605        | 1128.5839       | 2239.1340        | 1120.0706        | 2238.1500        | 1119.5786        | V    | 246.1812         | 123.5942        | 229.1547         | 115.0810         |                  |                  | 2  |
| 21 |                  |                 |                  |                  |                  |                  | K    | 147.1128         | 74.0600         | 130.0863         | 65.5468          |                  |                  | 1  |

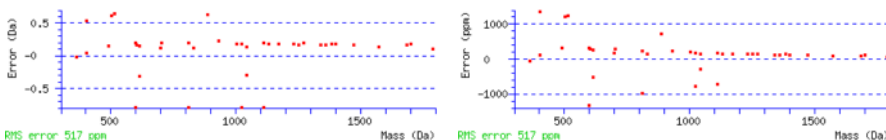

NCBI BLAST search of **TLTGKTITLEVEPSDTIENVK**  
 (Parameters: blastp, nr protein database, expect=20000, no filter, PAM30)  
 Other BLAST [web gateways](#)

All matches to this query

| Score | Mr(calc): | Delta   | Sequence                               |
|-------|-----------|---------|----------------------------------------|
| 96.9  | 2401.2588 | 0.1767  | <a href="#">TLTGKTITLEVEPSDTIENVK</a>  |
| 21.2  | 2402.1886 | -0.7532 | <a href="#">MGAEGIKDLLLEGLDLDEVIDK</a> |
| 21.1  | 2402.2839 | -0.8484 | <a href="#">LKTITGLTVDOVMAARVLESEK</a> |
| 19.9  | 2401.2675 | 0.1680  | <a href="#">MKIKITVDLEYIOPEKPK</a>     |
| 19.9  | 2401.2675 | 0.1680  | <a href="#">MKIKITVDLEYIOPEKPK</a>     |
| 19.6  | 2401.1730 | 0.2625  | <a href="#">MVNSGTEATMSAVKLRAGYTGK</a> |
| 19.0  | 2402.2693 | -0.8339 | <a href="#">FPVEFEVTVLESTVNVGRITGK</a> |
| 18.4  | 2401.1972 | 0.2382  | <a href="#">QEDIDSLSDDEIITLAKNLR</a>   |
| 18.2  | 2402.2442 | -0.8087 | <a href="#">TVIGTFVVEGATVEATVEKQGR</a> |
| 18.1  | 2401.2060 | 0.2295  | <a href="#">CDISNWNLINKTIDQVLK</a>     |

**Mascot Search Results**

**Peptide View**

MS/MS Fragmentation of **LIFAGKQLEDGR**

Found in **YD\_RFP-BARD-BRCA-Ub**, YD\_RFP-BARD-BRCA-Ub

Match to Query 500: 1459.979448 from(730.997000,2+) intensity(17306768.0000)

Title: Cmpd 81, +MSn(731.33), 24.2 min

Data file C:\YaelDavid\100203\_YaelDavid\BIT00822\_YD\_9\_merge.mgf

Click mouse within plot area to zoom in by factor of two about that point

Or, Plot from 200 to 1300 Da Full range

Label all possible matches  Label matches used for scoring

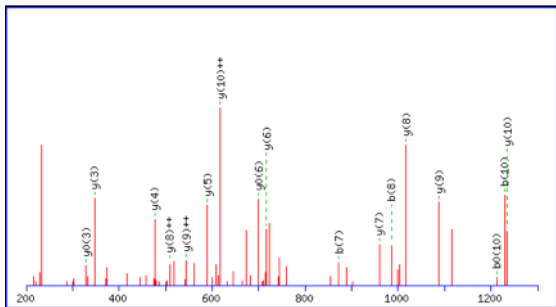

Monoisotopic mass of neutral peptide Mr(calc): 1459.7783

Fixed modifications: Carbamidomethyl (C) (apply to specified residues or termini only)

Variable modifications:

K6 : GlyGly (K)

Ions Score: 71 Expect: 6.9e-05

Matches : 17/102 Fragment ions using 21 most intense peaks [\(help\)](#)

| #  | b                | b <sup>++</sup> | b*        | b <sup>*++</sup> | b <sup>0</sup>   | b <sup>0++</sup> | Seq. | y                | y <sup>++</sup> | y*        | y <sup>*++</sup> | y <sup>0</sup>  | y <sup>0++</sup> | #  |
|----|------------------|-----------------|-----------|------------------|------------------|------------------|------|------------------|-----------------|-----------|------------------|-----------------|------------------|----|
| 1  | 114.0913         | 57.5493         |           |                  |                  |                  | L    |                  |                 |           |                  |                 |                  | 12 |
| 2  | 227.1754         | 114.0913        |           |                  |                  |                  | I    | 1347.7015        | 674.3544        | 1330.6750 | 665.8411         | 1329.6910       | 665.3491         | 11 |
| 3  | 374.2438         | 187.6255        |           |                  |                  |                  | F    | <b>1234.6175</b> | <b>617.8124</b> | 1217.5909 | 609.2991         | 1216.6069       | 608.8071         | 10 |
| 4  | 445.2809         | 223.1441        |           |                  |                  |                  | A    | <b>1087.5491</b> | <b>544.2782</b> | 1070.5225 | 535.7649         | 1069.5385       | 535.2729         | 9  |
| 5  | 502.3024         | 251.6548        |           |                  |                  |                  | G    | <b>1016.5119</b> | <b>508.7596</b> | 999.4854  | 500.2463         | 998.5014        | 499.7543         | 8  |
| 6  | 744.4403         | 372.7238        | 727.4137  | 364.2105         |                  |                  | K    | <b>959.4905</b>  | 480.2489        | 942.4639  | 471.7356         | 941.4799        | 471.2436         | 7  |
| 7  | <b>872.4989</b>  | 436.7531        | 855.4723  | 428.2398         |                  |                  | Q    | <b>717.3526</b>  | 359.1799        | 700.3260  | 350.6667         | <b>699.3420</b> | 350.1747         | 6  |
| 8  | <b>985.5829</b>  | 493.2951        | 968.5564  | 484.7818         |                  |                  | L    | <b>589.2940</b>  | 295.1506        | 572.2675  | 286.6374         | 571.2835        | 286.1454         | 5  |
| 9  | 1114.6255        | 557.8164        | 1097.5990 | 549.3031         | 1096.6150        | 548.8111         | E    | <b>476.2100</b>  | 238.6086        | 459.1834  | 230.0953         | 458.1994        | 229.6033         | 4  |
| 10 | <b>1229.6525</b> | 615.3299        | 1212.6259 | 606.8166         | <b>1211.6419</b> | 606.3246         | D    | <b>347.1674</b>  | 174.0873        | 330.1408  | 165.5740         | <b>329.1568</b> | 165.0820         | 3  |
| 11 | 1286.6739        | 643.8406        | 1269.6474 | 635.3273         | 1268.6634        | 634.8353         | G    | 232.1404         | 116.5738        | 215.1139  | 108.0606         |                 |                  | 2  |
| 12 |                  |                 |           |                  |                  |                  | R    | 175.1190         | 88.0631         | 158.0924  | 79.5498          |                 |                  | 1  |

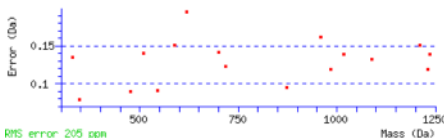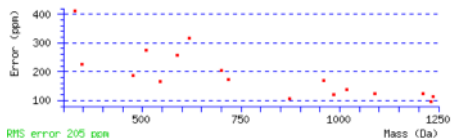

NCBI BLAST search of **LIFAGKQLEDGR**

(Parameters: blastp, nr protein database, expect=20000, no filter, PAM30)

Other BLAST [web gateways](#)

**All matches to this query**

| Score | Mr(calc): | Delta   | Sequence                      |
|-------|-----------|---------|-------------------------------|
| 70.8  | 1459.7783 | 0.2011  | <a href="#">LIFAGKQLEDGR</a>  |
| 25.5  | 1459.8293 | 0.1502  | <a href="#">LTRMIRTAGALK</a>  |
| 24.2  | 1460.7544 | -0.7750 | <a href="#">NIEMQQLELSK</a>   |
| 21.6  | 1459.7817 | 0.1978  | <a href="#">LLATGMERAGIAK</a> |
| 20.7  | 1459.8068 | 0.1726  | <a href="#">DMIVNGITVKIK</a>  |
| 20.4  | 1459.7453 | 0.2342  | <a href="#">KMAQEQEKLK</a>    |
| 19.9  | 1459.7307 | 0.2488  | <a href="#">ALENALPYLEDGR</a> |
| 19.5  | 1459.8068 | 0.1727  | <a href="#">ILQEKMEKAIK</a>   |
| 19.2  | 1457.7950 | 2.1844  | <a href="#">EIEAGKVSVRTR</a>  |
| 18.8  | 1460.7908 | -0.8114 | <a href="#">TVEMLKAEGLK</a>   |

Mascot: <http://www.matrixscience.com/>

(MATRIX) Mascot Search Results

Protein View

Match to: YD\_RFP-BARD-BRCA-Ub Score: 1711
YD\_RFP-BARD-BRCA-Ub
Found in search of C:\YaelDavid\100203\_YaelDavid\BIT00869\_YD\_14\_merge.mgf

Nominal mass (Mr): 60628; Calculated pI value: 6.10
NCBI BLAST search of YD\_RFP-BARD-BRCA-Ub against nr
Unformatted sequence string for pasting into other applications

Fixed modifications: Carbamidomethyl (C)
Variable modifications: GlyGly (K), Oxidation (M)
Cleavage by Trypsin: cuts C-term side of KR unless next residue is P
Sequence Coverage: 48%

Matched peptides shown in Bold Red

1 MHHHHHHASS EDVIKEFMRP KVRMEGSVNG HEFEIEGEGE GRPYEGTQTA
51 KLRVTKGGPL PFAWDILSPQ FQYGSKAYVK HPADIPDYLK LSFPEGFKWE
101 RVMNFDGGV VTVQDSSLQ DGEFLYKVKL RGTNFPDGP VMQKTMGWG
151 ASYERMPED GALKGEIKMR LKLDGGHYD AEVLTYYMAK KPVQLPGAYK
201 TDIKLDTSH NEDYTVIEQY ERAEGRHSYG AENLTFQGLE EFDGRGAWAH
251 SRALDLREK LLRCSRCWII LRFVCLGGC EHFYCSNVVS DCIQTGCPVC
301 VTPAWIQDLK INRQLDSMIQ LCSKLRNLLH DNELSLDKED GSGGDLALS
351 RVEEVQNVIN AMQKILECFPI CLELLKEFVS TKCDHIFCKP CMLKLLNQKK
401 GFSQCPLECN DITKRSLQES TRFSQIAVEK LKILICAFQLD TGLEYSANSYN
451 FAKQIVFKTL TCKTITLVEE PSDTIENVEK KIQDKREGIPP DQQRILFAGK
501 QLEDGRITSD YNIQKESTLH LVLRRLRGG

Show predicted peptides also

Sort Peptides By \* Residue Number o Increasing Mass o Decreasing Mass

Table with columns: Start, End, Observed, Mr (expt), Mr (calc), Delta, Miss, Sequence. Contains search results for various peptides with their scores and modifications.

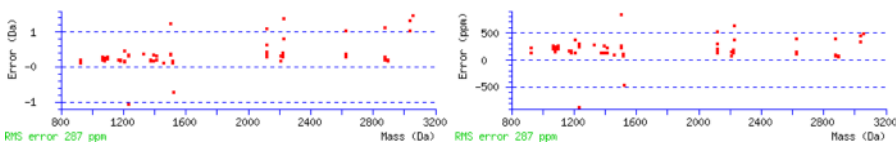

**Mascot Search Results**

**Peptide View**

MS/MS Fragmentation of **LIFAGKQLEDGR**

Found in **YD\_RFP-BARD-BRCA-Ub**, YD\_RFP-BARD-BRCA-Ub

Match to Query 151: 1459.903448 from(730.959000,2+) intensity(1157459.0000)

Title: Cmpd 61, +MSn(731.07), 22.6 min

Data file C:\YaelDavid\100203\_YaelDavid\BIT00869\_YD\_14\_merge.mgf

Click mouse within plot area to zoom in by factor of two about that point

Or, Plot from 200 to 1400 Da Full range

Label all possible matches  Label matches used for scoring

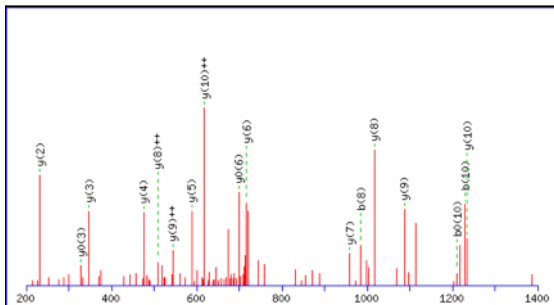

Monoisotopic mass of neutral peptide Mr(calc): 1459.7783

Fixed modifications: Carbamidomethyl (C) (apply to specified residues or termini only)

Variable modifications:

K6 : GlyGly (K)

Ions Score: 77 Expect: 5.7e-05

Matches : 17/102 Fragment ions using 23 most intense peaks [\(help\)](#)

| #  | b                | b <sup>++</sup> | b*        | b <sup>*++</sup> | b <sup>0</sup>   | b <sup>0++</sup> | Seq. | y                | y <sup>++</sup> | y*        | y <sup>*++</sup> | y <sup>0</sup>  | y <sup>0++</sup> | #  |
|----|------------------|-----------------|-----------|------------------|------------------|------------------|------|------------------|-----------------|-----------|------------------|-----------------|------------------|----|
| 1  | 114.0913         | 57.5493         |           |                  |                  |                  | L    |                  |                 |           |                  |                 |                  | 12 |
| 2  | 227.1754         | 114.0913        |           |                  |                  |                  | I    | 1347.7015        | 674.3544        | 1330.6750 | 665.8411         | 1329.6910       | 665.3491         | 11 |
| 3  | 374.2438         | 187.6255        |           |                  |                  |                  | F    | <b>1234.6175</b> | <b>617.8124</b> | 1217.5909 | 609.2991         | 1216.6069       | 608.8071         | 10 |
| 4  | 445.2809         | 223.1441        |           |                  |                  |                  | A    | <b>1087.5491</b> | <b>544.2782</b> | 1070.5225 | 535.7649         | 1069.5385       | 535.2729         | 9  |
| 5  | 502.3024         | 251.6548        |           |                  |                  |                  | G    | <b>1016.5119</b> | <b>508.7596</b> | 999.4854  | 500.2463         | 998.5014        | 499.7543         | 8  |
| 6  | 744.4403         | 372.7238        | 727.4137  | 364.2105         |                  |                  | K    | <b>959.4905</b>  | 480.2489        | 942.4639  | 471.7356         | 941.4799        | 471.2436         | 7  |
| 7  | 872.4989         | 436.7531        | 855.4723  | 428.2398         |                  |                  | Q    | <b>717.3526</b>  | 359.1799        | 700.3260  | 350.6667         | <b>699.3420</b> | 350.1747         | 6  |
| 8  | <b>985.5829</b>  | 493.2951        | 968.5564  | 484.7818         |                  |                  | L    | <b>589.2940</b>  | 295.1506        | 572.2675  | 286.6374         | 571.2835        | 286.1454         | 5  |
| 9  | 1114.6255        | 557.8164        | 1097.5990 | 549.3031         | 1096.6150        | 548.8111         | E    | <b>476.2100</b>  | 238.6086        | 459.1834  | 230.0953         | 458.1994        | 229.6033         | 4  |
| 10 | <b>1229.6525</b> | 615.3299        | 1212.6259 | 606.8166         | <b>1211.6419</b> | 606.3246         | D    | <b>347.1674</b>  | 174.0873        | 330.1408  | 165.5740         | <b>329.1568</b> | 165.0820         | 3  |
| 11 | 1286.6739        | 643.8406        | 1269.6474 | 635.3273         | 1268.6634        | 634.8353         | G    | <b>232.1404</b>  | 116.5738        | 215.1139  | 108.0606         |                 |                  | 2  |
| 12 |                  |                 |           |                  |                  |                  | R    | 175.1190         | 88.0631         | 158.0924  | 79.5498          |                 |                  | 1  |

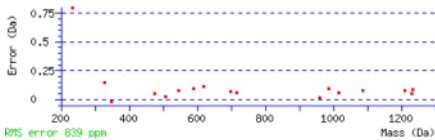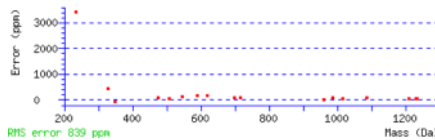

NCBI BLAST search of **LIFAGKQLEDGR**

(Parameters: blastp, nr protein database, expect=20000, no filter, PAM30)

Other BLAST [web gateways](#)

**All matches to this query**

| Score | Mr(calc): | Delta   | Sequence                        |
|-------|-----------|---------|---------------------------------|
| 77.1  | 1459.7783 | 0.1251  | <a href="#">LIFAGKQLEDGR</a>    |
| 30.7  | 1458.7929 | 1.1105  | <a href="#">AASDAVLDKLES LK</a> |
| 30.1  | 1458.7467 | 1.1568  | <a href="#">AAPFIAGTAALEDGR</a> |
| 29.3  | 1459.6725 | 0.2309  | <a href="#">EAAALQCQLEDGR</a>   |
| 23.0  | 1459.7307 | 0.1728  | <a href="#">ALENALPYLEDGR</a>   |
| 21.6  | 1457.7474 | 2.1561  | <a href="#">KEAQVKA EAK</a>     |
| 20.8  | 1457.7263 | 2.1771  | <a href="#">AVLTHGYVVDG DGR</a> |
| 20.6  | 1459.7718 | 0.1316  | <a href="#">VKGSRGTG WIPMGR</a> |
| 20.4  | 1459.8398 | 0.0636  | <a href="#">LLEFAIAEKGNKEK</a>  |
| 20.0  | 1460.7471 | -0.8436 | <a href="#">STQEAI DKITNK</a>   |

Mascot: <http://www.matrixscience.com/>



|           |          |           |           |        |   |               |                 |
|-----------|----------|-----------|-----------|--------|---|---------------|-----------------|
| 507 - 515 | 541.3520 | 1080.6894 | 1080.5451 | 0.1443 | 0 | R.TLSDYNIQK.E | (Ions score 54) |
| 507 - 515 | 541.4180 | 1080.8214 | 1080.5451 | 0.2763 | 0 | R.TLSDYNIQK.E | (Ions score 51) |
| 516 - 524 | 534.4120 | 1066.8094 | 1066.6135 | 0.1960 | 0 | K.ESTLHLVLR.L | (Ions score 43) |
| 516 - 524 | 534.4520 | 1066.8894 | 1066.6135 | 0.2760 | 0 | K.ESTLHLVLR.L | (Ions score 43) |

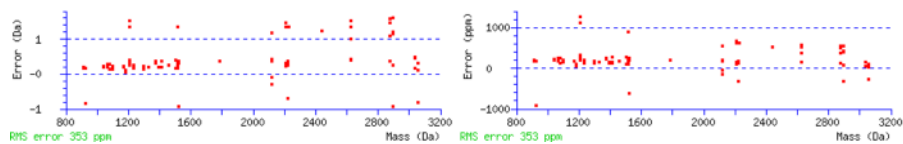

Mascot: <http://www.matrixscience.com/>



**MATRIX SCIENCE Mascot Search Results**

**Peptide View**

MS/MS Fragmentation of **LIFAGKQLEDGR**

Found in **YD\_RFP-BARD-BCRA-Ub**, YD\_RFP-BARD-BCRA-Ub

Match to Query 151: 1460.021448 from (731.018000,2+) intensity(1426711.0000)

Title: Cmpd 78, +MSn(731.11), 22.7 min

Data file C:\YaelDavid\100203\_YaelDavid\BIT00871\_YD\_15\_merge.mgf

Click mouse within plot area to zoom in by factor of two about that point

Or, Plot from 200 to 1300 Da Full range

Label all possible matches  Label matches used for scoring

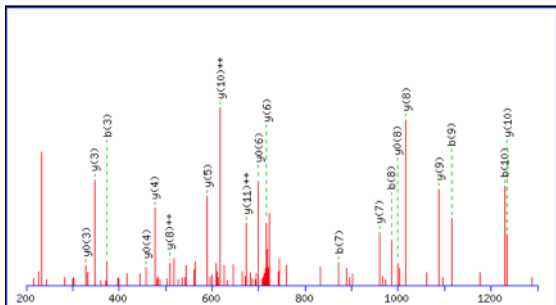

Monoisotopic mass of neutral peptide Mr(calc): 1459.7783

Fixed modifications: Carbamidomethyl (C) (apply to specified residues or termini only)

Variable modifications:

K6 : GlyGly (K)

Ions Score: 58 Expect: 0.00027

Matches : 20/102 Fragment ions using 31 most intense peaks [\(help\)](#)

| #  | b         | b <sup>++</sup> | b*        | b <sup>*++</sup> | b <sup>0</sup> | b <sup>0++</sup> | Seq. | y         | y <sup>++</sup> | y*        | y <sup>*++</sup> | y <sup>0</sup> | y <sup>0++</sup> | #  |
|----|-----------|-----------------|-----------|------------------|----------------|------------------|------|-----------|-----------------|-----------|------------------|----------------|------------------|----|
| 1  | 114.0913  | 57.5493         |           |                  |                |                  | L    |           |                 |           |                  |                |                  | 12 |
| 2  | 227.1754  | 114.0913        |           |                  |                |                  | I    | 1347.7015 | 674.3544        | 1330.6750 | 665.8411         | 1329.6910      | 665.3491         | 11 |
| 3  | 374.2438  | 187.6255        |           |                  |                |                  | F    | 1234.6175 | 617.8124        | 1217.5909 | 609.2991         | 1216.6069      | 608.8071         | 10 |
| 4  | 445.2809  | 223.1441        |           |                  |                |                  | A    | 1087.5491 | 544.2782        | 1070.5225 | 535.7649         | 1069.5385      | 535.2729         | 9  |
| 5  | 502.3024  | 251.6548        |           |                  |                |                  | G    | 1016.5119 | 508.7596        | 999.4854  | 500.2463         | 998.5014       | 499.7543         | 8  |
| 6  | 744.4403  | 372.7238        | 727.4137  | 364.2105         |                |                  | K    | 959.4905  | 480.2489        | 942.4639  | 471.7356         | 941.4799       | 471.2436         | 7  |
| 7  | 872.4989  | 436.7531        | 855.4723  | 428.2398         |                |                  | Q    | 717.3526  | 359.1799        | 700.3260  | 350.6667         | 699.3420       | 350.1747         | 6  |
| 8  | 985.5829  | 493.2951        | 968.5564  | 484.7818         |                |                  | L    | 589.2940  | 295.1506        | 572.2675  | 286.6374         | 571.2835       | 286.1454         | 5  |
| 9  | 1114.6255 | 557.8164        | 1097.5990 | 549.3031         | 1096.6150      | 548.8111         | E    | 476.2100  | 238.6086        | 459.1834  | 230.0953         | 458.1994       | 229.6033         | 4  |
| 10 | 1229.6525 | 615.3299        | 1212.6259 | 606.8166         | 1211.6419      | 606.3246         | D    | 347.1674  | 174.0873        | 330.1408  | 165.5740         | 329.1568       | 165.0820         | 3  |
| 11 | 1286.6739 | 643.8406        | 1269.6474 | 635.3273         | 1268.6634      | 634.8353         | G    | 232.1404  | 116.5738        | 215.1139  | 108.0606         |                |                  | 2  |
| 12 |           |                 |           |                  |                |                  | R    | 175.1190  | 88.0631         | 158.0924  | 79.5498          |                |                  | 1  |

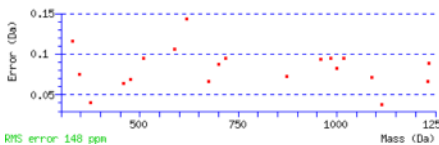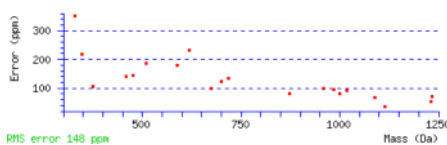

NCBI BLAST search of **LIFAGKQLEDGR**

(Parameters: blastp, nr protein database, expect=20000, no filter, PAM30)

Other BLAST [web gateways](#)

All matches to this query

| Score | Mr(calc): | Delta   | Sequence                         |
|-------|-----------|---------|----------------------------------|
| 57.6  | 1459.7783 | 0.2431  | <a href="#">LIFAGKQLEDGR</a>     |
| 19.1  | 1460.7116 | -0.6901 | <a href="#">LNGGLGTTMGCVGPQK</a> |
| 18.4  | 1459.8398 | 0.1816  | <a href="#">LLEFAIAEKGNKEK</a>   |
| 18.0  | 1460.7987 | -0.7773 | <a href="#">AGVFKKVDEIK</a>      |
| 18.0  | 1460.7987 | -0.7773 | <a href="#">AGVFKKVDELK</a>      |
| 15.9  | 1459.8293 | 0.1922  | <a href="#">LTRMIRTAGALK</a>     |
| 15.7  | 1459.8610 | 0.1605  | <a href="#">TKTKLSVLESIK</a>     |
| 15.7  | 1459.8610 | 0.1605  | <a href="#">TKTKLSVLESIK</a>     |
| 15.7  | 1459.7718 | 0.2496  | <a href="#">VKGSRITGWIPMGR</a>   |
| 15.1  | 1459.8181 | 0.2034  | <a href="#">IMIKGGGAALTRK</a>    |

Mascot: <http://www.matrixscience.com/>



**MASCOT** **SCIENCE** Mascot Search Results

**Peptide View**

MS/MS Fragmentation of **KPVQLPGAYK**  
 Found in **YD\_RFP-BARD-BRCA-Ub**, YD\_RFP-BARD-BRCA-Ub

Match to Query 81: 1214.025448 from(608.020000,2+) intensity(408861.0000)  
 Title: Cmpd 20\_+MSn(608.31), 18.8 min  
 Data file C:\YaelDavid\100203\_YaelDavid\BIT00873\_YD\_16\_merge.mgf

Click mouse within plot area to zoom in by factor of two about that point

Or, Plot from 200 to 1600 Da Full range

Label all possible matches  Label matches used for scoring

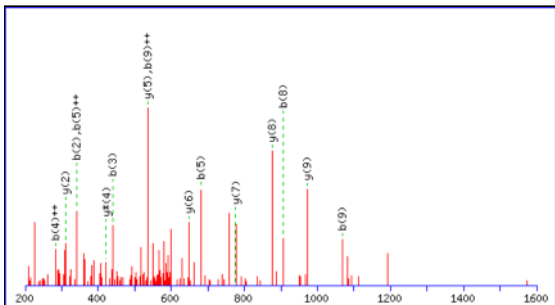

Monoisotopic mass of neutral peptide Mr(calc): 1213.6819  
 Fixed modifications: Carbamidomethyl (C) (apply to specified residues or termini only)  
 Variable modifications:  
 K1 : GlyGly (K)  
 Ions Score: 44 Expect: 0.085  
 Matches : 15/72 fragment ions using 20 most intense peaks ([help](#))

| #  | b                | b <sup>++</sup> | b <sup>*</sup> | b <sup>*++</sup> | Seq.     | y               | y <sup>++</sup> | y <sup>*</sup>  | y <sup>*++</sup> | #         |
|----|------------------|-----------------|----------------|------------------|----------|-----------------|-----------------|-----------------|------------------|-----------|
| 1  | 243.1452         | 122.0762        | 226.1186       | 113.5629         | <b>K</b> |                 |                 |                 |                  | <b>10</b> |
| 2  | <b>340.1979</b>  | 170.6026        | 323.1714       | 162.0893         | <b>P</b> | <b>972.5513</b> | 486.7793        | 955.5247        | 478.2660         | <b>9</b>  |
| 3  | <b>439.2663</b>  | 220.1368        | 422.2398       | 211.6235         | <b>V</b> | <b>875.4985</b> | 438.2529        | 858.4720        | 429.7396         | <b>8</b>  |
| 4  | 567.3249         | <b>284.1661</b> | 550.2984       | 275.6528         | <b>Q</b> | <b>776.4301</b> | 388.7187        | 759.4036        | 380.2054         | <b>7</b>  |
| 5  | <b>680.4090</b>  | <b>340.7081</b> | 663.3824       | 332.1949         | <b>L</b> | <b>648.3715</b> | 324.6894        | 631.3450        | 316.1761         | <b>6</b>  |
| 6  | 777.4618         | 389.2345        | 760.4352       | 380.7212         | <b>P</b> | <b>535.2875</b> | 268.1474        | 518.2609        | 259.6341         | <b>5</b>  |
| 7  | 834.4832         | 417.7452        | 817.4567       | 409.2320         | <b>G</b> | 438.2347        | 219.6210        | <b>421.2082</b> | 211.1077         | <b>4</b>  |
| 8  | <b>905.5203</b>  | 453.2638        | 888.4938       | 444.7505         | <b>A</b> | 381.2132        | 191.1103        | 364.1867        | 182.5970         | <b>3</b>  |
| 9  | <b>1068.5837</b> | <b>534.7955</b> | 1051.5571      | 526.2822         | <b>Y</b> | <b>310.1761</b> | 155.5917        | 293.1496        | 147.0784         | <b>2</b>  |
| 10 |                  |                 |                |                  | <b>K</b> | 147.1128        | 74.0600         | 130.0863        | 65.5468          | <b>1</b>  |

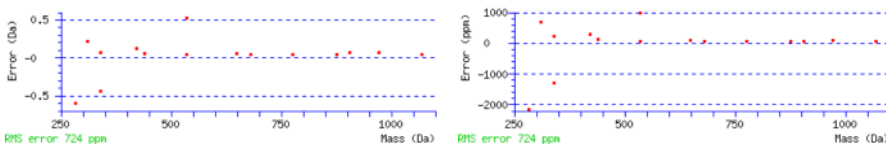

NCBI BLAST search of **KPVQLPGAYK**  
 (Parameters: blastp, nr protein database, expect=20000, no filter, PAM30)  
 Other BLAST [web gateways](#)

**All matches to this query**

| Score | Mr(calc): | Delta  | Sequence                    |
|-------|-----------|--------|-----------------------------|
| 44.4  | 1213.6819 | 0.3436 | <a href="#">KPVQLPGAYK</a>  |
| 31.6  | 1213.5615 | 0.4639 | <a href="#">NFDITGLQEYK</a> |
| 22.4  | 1213.7434 | 0.2820 | <a href="#">LILVPFLNGTK</a> |
| 21.5  | 1213.7394 | 0.2861 | <a href="#">TLEKIKQNK</a>   |
| 17.5  | 1213.6203 | 0.4051 | <a href="#">KNHPGKEYK</a>   |
| 17.1  | 1213.7407 | 0.2847 | <a href="#">KPIPKHPRK</a>   |
| 17.1  | 1213.6455 | 0.3799 | <a href="#">KPLQPFQDK</a>   |
| 16.8  | 1213.7832 | 0.2423 | <a href="#">ILLVAVSIKMK</a> |
| 16.8  | 1213.7394 | 0.2861 | <a href="#">LIIVNNSVKK</a>  |
| 16.8  | 1213.6805 | 0.3449 | <a href="#">LLLVEEEEK</a>   |

Mascot: <http://www.matrixscience.com/>

**MASCOT** **SCIENCE** Mascot Search Results

Peptide View

MS/MS Fragmentation of **LIFAGKQLEDGR**

Found in **YD\_RFP-BARD-BRCA-Ub**, YD\_RFP-BARD-BRCA-Ub

Match to Query 141: 1459.953448 from (730.984000,2+) intensity(5187925.0000)

Title: Cmpd 70, +MSn(731.30), 22.9 min

Data file C:\YaelDavid\100203\_YaelDavid\BIT00873\_YD\_16\_merge.mgf

Click mouse within plot area to zoom in by factor of two about that point

Or, Plot from 200 to 1300 Da Full range

Label all possible matches  Label matches used for scoring

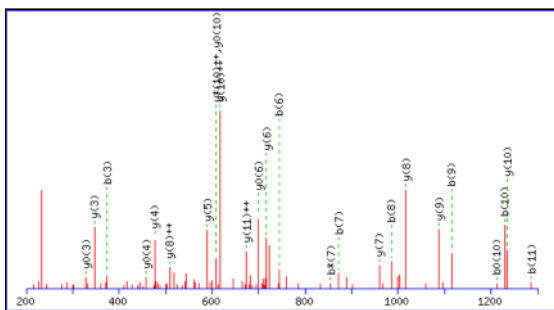

Monoisotopic mass of neutral peptide Mr(calc): 1459.7783

Fixed modifications: Carbamidomethyl (C) (apply to specified residues or termini only)

Variable modifications:

K6 : GlyGly (K)

Ions Score: 71 Expect: 0.00012

Matches : 25/102 Fragment ions using 31 most intense peaks (help)

| #  | b         | b <sup>++</sup> | b*        | b <sup>*++</sup> | b <sup>0</sup> | b <sup>0++</sup> | Seq. | y         | y <sup>++</sup> | y*        | y <sup>*++</sup> | y <sup>0</sup> | y <sup>0++</sup> | #  |
|----|-----------|-----------------|-----------|------------------|----------------|------------------|------|-----------|-----------------|-----------|------------------|----------------|------------------|----|
| 1  | 114.0913  | 57.5493         |           |                  |                |                  | L    |           |                 |           |                  |                |                  | 12 |
| 2  | 227.1754  | 114.0913        |           |                  |                |                  | I    | 1347.7015 | 674.3544        | 1330.6750 | 665.8411         | 1329.6910      | 665.3491         | 11 |
| 3  | 374.2438  | 187.6255        |           |                  |                |                  | F    | 1234.6175 | 617.8124        | 1217.5909 | 609.2991         | 1216.6069      | 608.8071         | 10 |
| 4  | 445.2809  | 223.1441        |           |                  |                |                  | A    | 1087.5491 | 544.2782        | 1070.5225 | 535.7649         | 1069.5385      | 535.2729         | 9  |
| 5  | 502.3024  | 251.6548        |           |                  |                |                  | G    | 1016.5119 | 508.7596        | 999.4854  | 500.2463         | 998.5014       | 499.7543         | 8  |
| 6  | 744.4403  | 372.7238        | 727.4137  | 364.2105         |                |                  | K    | 959.4905  | 480.2489        | 942.4639  | 471.7356         | 941.4799       | 471.2436         | 7  |
| 7  | 872.4989  | 436.7531        | 855.4723  | 428.2398         |                |                  | Q    | 717.3526  | 359.1799        | 700.3260  | 350.6667         | 699.3420       | 350.1747         | 6  |
| 8  | 985.5829  | 493.2951        | 968.5564  | 484.7818         |                |                  | L    | 589.2940  | 295.1506        | 572.2675  | 286.6374         | 571.2835       | 286.1454         | 5  |
| 9  | 1114.6255 | 557.8164        | 1097.5990 | 549.3031         | 1096.6150      | 548.8111         | E    | 476.2100  | 238.6086        | 459.1834  | 230.0953         | 458.1994       | 229.6033         | 4  |
| 10 | 1229.6525 | 615.3299        | 1212.6259 | 606.8166         | 1211.6419      | 606.3246         | D    | 347.1674  | 174.0873        | 330.1408  | 165.5740         | 329.1568       | 165.0820         | 3  |
| 11 | 1286.6739 | 643.8406        | 1269.6474 | 635.3273         | 1268.6634      | 634.8353         | G    | 232.1404  | 116.5738        | 215.1139  | 108.0606         |                |                  | 2  |
| 12 |           |                 |           |                  |                |                  | R    | 175.1190  | 88.0631         | 158.0924  | 79.5498          |                |                  | 1  |

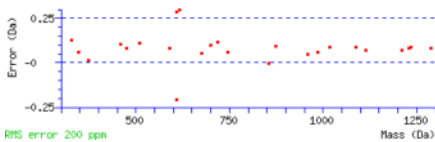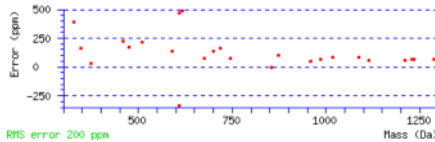

NCBI BLAST search of **LIFAGKQLEDGR**

(Parameters: blastp, nr protein database, expect=20000, no filter, PAM30)

Other BLAST [web gateways](#)

All matches to this query

| Score | Mr(calc): | Delta   | Sequence                      |
|-------|-----------|---------|-------------------------------|
| 71.4  | 1459.7783 | 0.1751  | <a href="#">LIFAGKQLEDGR</a>  |
| 28.4  | 1460.7987 | -0.8453 | <a href="#">AGVFKKVDEIK</a>   |
| 28.4  | 1460.7987 | -0.8453 | <a href="#">AGVFKKVDELK</a>   |
| 26.7  | 1459.6725 | 0.2809  | <a href="#">EAAALQCQLEDGR</a> |
| 20.6  | 1460.7987 | -0.8453 | <a href="#">AGVFKKVDEIK</a>   |
| 20.6  | 1460.7987 | -0.8453 | <a href="#">AGVFKKVDELK</a>   |
| 20.2  | 1459.7089 | 0.2445  | <a href="#">ATAITMPKADDGR</a> |
| 19.5  | 1459.8432 | 0.1102  | <a href="#">SGMVTLKLEKIK</a>  |
| 18.4  | 1459.7307 | 0.2228  | <a href="#">ALENALPYLEDGR</a> |
| 18.4  | 1459.7817 | 0.1718  | <a href="#">LLATGMERAGIAK</a> |

Mascot: <http://www.matrixscience.com/>



**(MATRIX) (SCIENCE) Mascot Search Results**

**Peptide View**

MS/MS Fragmentation of **LIFAGKQLEDGR**

Found in **YD\_RFP-BARD-BRCA-Ub**, YD\_RFP-BARD-BRCA-Ub

Match to Query 123: 1460.075448 from(731.045000,2+) intensity(1467660.0000)

Title: Cmpd 66, +MSn(731.47), 22.8 min

Data file C:\YaelDavid\100203\_YaelDavid\BIT00875\_YD\_17\_merge.mgf

Click mouse within plot area to zoom in by factor of two about that point

Or, Plot from 200 to 1500 Da Full range

Label all possible matches  Label matches used for scoring

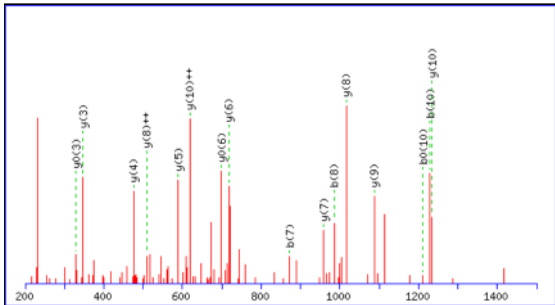

Monoisotopic mass of neutral peptide Mr(calc): 1459.7783

Fixed modifications: Carbamidomethyl (C) (apply to specified residues or termini only)

Variable modifications:

K6 : GlyGly (K)

Ions Score: 62 Expect: 0.00012

Matches : 16/102 Fragment ions using 23 most intense peaks [\(help\)](#)

| #  | b                | b <sup>++</sup> | b <sup>*</sup> | b <sup>*++</sup> | b <sup>0</sup>   | b <sup>0++</sup> | Seq. | y                | y <sup>++</sup> | y <sup>*</sup> | y <sup>*++</sup> | y <sup>0</sup>  | y <sup>0++</sup> | #  |
|----|------------------|-----------------|----------------|------------------|------------------|------------------|------|------------------|-----------------|----------------|------------------|-----------------|------------------|----|
| 1  | 114.0913         | 57.5493         |                |                  |                  |                  | L    |                  |                 |                |                  |                 |                  | 12 |
| 2  | 227.1754         | 114.0913        |                |                  |                  |                  | I    | 1347.7015        | 674.3544        | 1330.6750      | 665.8411         | 1329.6910       | 665.3491         | 11 |
| 3  | 374.2438         | 187.6255        |                |                  |                  |                  | F    | <b>1234.6175</b> | <b>617.8124</b> | 1217.5909      | 609.2991         | 1216.6069       | 608.8071         | 10 |
| 4  | 445.2809         | 223.1441        |                |                  |                  |                  | A    | <b>1087.5491</b> | 544.2782        | 1070.5225      | 535.7649         | 1069.5385       | 535.2729         | 9  |
| 5  | 502.3024         | 251.6548        |                |                  |                  |                  | G    | <b>1016.5119</b> | <b>508.7596</b> | 999.4854       | 500.2463         | 998.5014        | 499.7543         | 8  |
| 6  | 744.4403         | 372.7238        | 727.4137       | 364.2105         |                  |                  | K    | <b>959.4905</b>  | 480.2489        | 942.4639       | 471.7356         | 941.4799        | 471.2436         | 7  |
| 7  | <b>872.4989</b>  | 436.7531        | 855.4723       | 428.2398         |                  |                  | Q    | <b>717.3526</b>  | 359.1799        | 700.3260       | 350.6667         | <b>699.3420</b> | 350.1747         | 6  |
| 8  | <b>985.5829</b>  | 493.2951        | 968.5564       | 484.7818         |                  |                  | L    | <b>589.2940</b>  | 295.1506        | 572.2675       | 286.6374         | 571.2835        | 286.1454         | 5  |
| 9  | 1114.6255        | 557.8164        | 1097.5990      | 549.3031         | 1096.6150        | 548.8111         | E    | <b>476.2100</b>  | 238.6086        | 459.1834       | 230.0953         | 458.1994        | 229.6033         | 4  |
| 10 | <b>1229.6525</b> | 615.3299        | 1212.6259      | 606.8166         | <b>1211.6419</b> | 606.3246         | D    | <b>347.1674</b>  | 174.0873        | 330.1408       | 165.5740         | <b>329.1568</b> | 165.0820         | 3  |
| 11 | 1286.6739        | 643.8406        | 1269.6474      | 635.3273         | 1268.6634        | 634.8353         | G    | 232.1404         | 116.5738        | 215.1139       | 108.0606         |                 |                  | 2  |
| 12 |                  |                 |                |                  |                  |                  | R    | 175.1190         | 88.0631         | 158.0924       | 79.5498          |                 |                  | 1  |

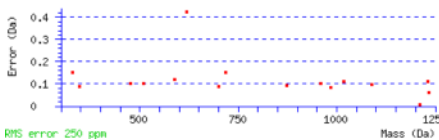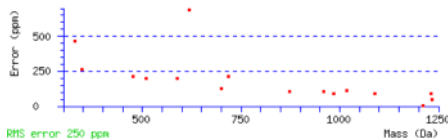

NCBI BLAST search of **LIFAGKQLEDGR**

(Parameters: blastp, nr protein database, expect=20000, no filter, PAM30)

Other BLAST [web gateways](#)

**All matches to this query**

| Score | Mr(calc): | Delta   | Sequence                      |
|-------|-----------|---------|-------------------------------|
| 62.0  | 1459.7783 | 0.2971  | <a href="#">LIFAGKQLEDGR</a>  |
| 19.6  | 1459.6725 | 0.4029  | <a href="#">EAAALQCQLEDGR</a> |
| 18.6  | 1460.7987 | -0.7232 | <a href="#">LAFNSLLEKAEAR</a> |
| 18.1  | 1459.8293 | 0.2462  | <a href="#">LTRMIRTAGALK</a>  |
| 17.9  | 1459.7453 | 0.3302  | <a href="#">KMAQEQEKLK</a>    |
| 16.9  | 1459.7671 | 0.3084  | <a href="#">GINYPTALEGALK</a> |
| 16.5  | 1460.7987 | -0.7233 | <a href="#">AGVFKKVDEIK</a>   |
| 16.5  | 1460.7987 | -0.7233 | <a href="#">AGVFKKVDELK</a>   |
| 16.4  | 1459.8610 | 0.2145  | <a href="#">TKTKLSVLESIK</a>  |
| 16.4  | 1459.8610 | 0.2145  | <a href="#">TKTKLSVLESIK</a>  |

Mascot: <http://www.matrixscience.com/>

MASCOT SCIENCE Mascot Search Results

Protein View

Match to: YD\_RFP-BARD-BRCA-Ub Score: 1956
YD\_RFP-BARD-BRCA-Ub
Found in search of C:\YaelDavid\100203\_YaelDavid\BIT00877\_YD\_18\_merge.mgf

Nominal mass (M\_r): 60628; Calculated pI value: 6.10
NCBI BLAST search of YD\_RFP-BARD-BRCA-Ub against nr
Unformatted sequence string for pasting into other applications

Fixed modifications: Carbamidomethyl (C)
Variable modifications: GlyGly (K), Oxidation (M)
Cleavage by Trypsin: cuts C-term side of KR unless next residue is P
Sequence Coverage: 53%

Matched peptides shown in Bold Red

1 MHHHHHHASS EDVIKEFMRF KVRMEGVSNG HEFEIEGEGR PRPYEGTQTA
51 KLKVTKGGPL PFAMWLLSQ FQYGSKAYVK HPADIPDYLK LSFPEGFQWE
101 RVMNFDGGV VTVQDSSLQ DGEFLYKVKL RGTNFPDGP VMQKRTMGWE
151 ASYERMYTSD GALKGEIKMR LKLDGGHVD AEVNTYMAK KPVQLPGAYK
201 TDIKLDTISH NEDTYIVQY ERAGEGRHSYG AENLTFQGLE EFDGGAWAH
251 SRALLDRLEK LLRCSGCTII LRFVCLGGG EHLFCNSVVS DCIOTGCPVC
301 VYPAWIQDLK INRQDLSMIQ LCSKLRNLLH DNEISDLKED GSGGSDLSAL
351 RVEEVQNVIN AMQKRLKCPH CLELLKPEVS TKCDHFCKF CMLKLLNQKK
401 GFSQCLPCKN DITKRSLQES TRFSQLVEEL LKLCARQLD TGLEANSYN
451 FAQKLFVKTL TGGKTTILEVE PSTDIENVKA KIQDKREGIP DQRLIFAGK
501 QLEDGRRLSD YNIQKESTLH LVLRRLGG

Show predicted peptides also

Sort Peptides By \* Residue Number o Increasing Mass o Decreasing Mass

Table with columns: Start, End, Observed, Mr (expt), Mr (calc), Delta, Miss, Sequence. Contains detailed peptide search results including scores and modifications.

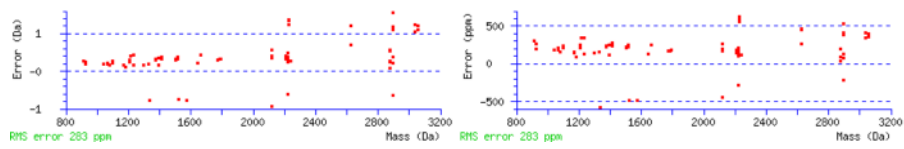

Mascot: <http://www.matrixscience.com/>



**(MATRIX SCIENCE) Mascot Search Results**

**Peptide View**

MS/MS Fragmentation of **KPVQLPGAYK**  
 Found in **YD\_RFP-BARD-BCRA-Ub**, YD\_RFP-BARD-BCRA-Ub

Match to Query 76: 1214.093448 from(608.054000,2+) intensity(124534.0000)  
 Title: Cmpd 19, +MSn(608.59), 18.7 min  
 Data file C:\YaelDavid\100203\_YaelDavid\BIT00877\_YD\_18\_merge.mgf

Click mouse within plot area to zoom in by factor of two about that point

Or, Plot from 200 to 1150 Da Full range

Label all possible matches  Label matches used for scoring

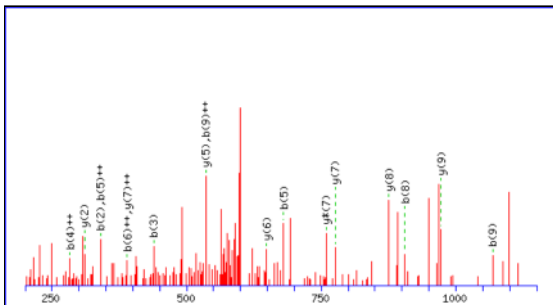

Monoisotopic mass of neutral peptide **Mr(calc)**: 1213.6819  
**Fixed modifications**: Carbamidomethyl (C) (apply to specified residues or termini only)  
**Variable modifications**:  
 K1 : GlyGly (K)  
**Ions Score**: 24 **Expect**: 0.77  
**Matches** : 17/72 fragment ions using 37 most intense peaks ([help](#))

| #  | b                | b <sup>++</sup> | b*        | b <sup>*++</sup> | Seq.     | y               | y <sup>++</sup> | y*              | y <sup>*++</sup> | #         |
|----|------------------|-----------------|-----------|------------------|----------|-----------------|-----------------|-----------------|------------------|-----------|
| 1  | 243.1452         | 122.0762        | 226.1186  | 113.5629         | <b>K</b> |                 |                 |                 |                  | <b>10</b> |
| 2  | <b>340.1979</b>  | 170.6026        | 323.1714  | 162.0893         | <b>P</b> | <b>972.5513</b> | 486.7793        | 955.5247        | 478.2660         | <b>9</b>  |
| 3  | <b>439.2663</b>  | 220.1368        | 422.2398  | 211.6235         | <b>V</b> | <b>875.4985</b> | 438.2529        | 858.4720        | 429.7396         | <b>8</b>  |
| 4  | 567.3249         | <b>284.1661</b> | 550.2984  | 275.6528         | <b>Q</b> | <b>776.4301</b> | <b>388.7187</b> | <b>759.4036</b> | 380.2054         | <b>7</b>  |
| 5  | <b>680.4090</b>  | <b>340.7081</b> | 663.3824  | 332.1949         | <b>L</b> | <b>648.3715</b> | 324.6894        | 631.3450        | 316.1761         | <b>6</b>  |
| 6  | 777.4618         | <b>389.2345</b> | 760.4352  | 380.7212         | <b>P</b> | <b>535.2875</b> | 268.1474        | 518.2609        | 259.6341         | <b>5</b>  |
| 7  | 834.4832         | 417.7452        | 817.4567  | 409.2320         | <b>G</b> | 438.2347        | 219.6210        | 421.2082        | 211.1077         | <b>4</b>  |
| 8  | <b>905.5203</b>  | 453.2638        | 888.4938  | 444.7505         | <b>A</b> | 381.2132        | 191.1103        | 364.1867        | 182.5970         | <b>3</b>  |
| 9  | <b>1068.5837</b> | <b>534.7955</b> | 1051.5571 | 526.2822         | <b>Y</b> | <b>310.1761</b> | 155.5917        | 293.1496        | 147.0784         | <b>2</b>  |
| 10 |                  |                 |           |                  | <b>K</b> | 147.1128        | 74.0600         | 130.0863        | 65.5468          | <b>1</b>  |

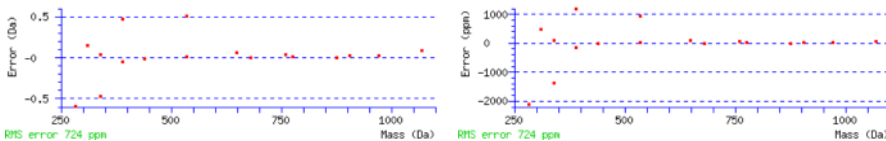

NCBI **BLAST** search of **KPVQLPGAYK**  
 (Parameters: blastp, nr protein database, expect=20000, no filter, PAM30)  
 Other BLAST [web gateways](#)

**All matches to this query**

| Score | Mr(calc): | Delta   | Sequence                    |
|-------|-----------|---------|-----------------------------|
| 23.7  | 1213.6819 | 0.4116  | <a href="#">KPVQLPGAYK</a>  |
| 21.6  | 1213.7434 | 0.3500  | <a href="#">LILVPFLNGTK</a> |
| 18.8  | 1213.6190 | 0.4744  | <a href="#">VLDQLLNLGDD</a> |
| 15.1  | 1213.6091 | 0.4843  | <a href="#">KEGIHPEYK</a>   |
| 13.0  | 1213.6125 | 0.4809  | <a href="#">VTTHQLQEMK</a>  |
| 12.5  | 1213.7142 | 0.3792  | <a href="#">KPKAKSTKK</a>   |
| 11.8  | 1213.6918 | 0.4016  | <a href="#">DKIVVPSDLTK</a> |
| 11.6  | 1214.5092 | -0.4157 | <a href="#">VESFNEGFGTE</a> |
| 11.6  | 1213.7832 | 0.3103  | <a href="#">ILLVAVSIKMK</a> |
| 11.6  | 1213.7394 | 0.3541  | <a href="#">LIIVNNSVKK</a>  |

Mascot: <http://www.matrixscience.com/>

**Mascot Search Results**

**Peptide View**

MS/MS Fragmentation of **TLSDYNIQKESTLHLVLR**  
 Found in **YD\_RFP-BARD-BRCA-Ub**, YD\_RFP-BARD-BRCA-Ub

Match to Query 313: 2243.463448 from(1122.739000,2+) intensity(2095379.0000)  
 Title: Cmpd 91, +MSn(1123.19), 25.5 min  
 Data file C:\YaelDavid\100203\_YaelDavid\BIT00877\_YD\_18\_merge.mgf

Click mouse within plot area to zoom in by factor of two about that point

Or, Plot from 300 to 2000 Da Full range

Label all possible matches  Label matches used for scoring

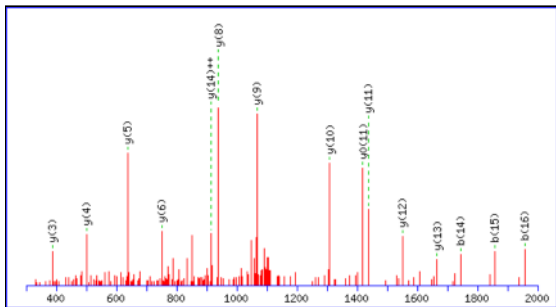

Monoisotopic mass of neutral peptide Mr(calc): 2243.1910  
 Fixed modifications: Carbamidomethyl (C) (apply to specified residues or termini only)  
 Variable modifications:  
 K9 : GlyGly (K)  
 Ions Score: 83 Expect: 1.7e-06  
 Matches : 15/182 Fragment ions using 17 most intense peaks ([help](#))

| #  | b         | b <sup>++</sup> | b*        | b <sup>*++</sup> | b <sup>0</sup> | b <sup>0++</sup> | Seq. | y         | y <sup>++</sup> | y*        | y <sup>*++</sup> | y <sup>0</sup> | y <sup>0++</sup> | #  |
|----|-----------|-----------------|-----------|------------------|----------------|------------------|------|-----------|-----------------|-----------|------------------|----------------|------------------|----|
| 1  | 102.0550  | 51.5311         |           |                  | 84.0444        | 42.5258          | T    |           |                 |           |                  |                |                  | 18 |
| 2  | 215.1390  | 108.0731        |           |                  | 197.1285       | 99.0679          | L    | 2143.1506 | 1072.0789       | 2126.1240 | 1063.5657        | 2125.1400      | 1063.0737        | 17 |
| 3  | 302.1710  | 151.5892        |           |                  | 284.1605       | 142.5839         | S    | 2030.0665 | 1015.5369       | 2013.0400 | 1007.0236        | 2012.0560      | 1006.5316        | 16 |
| 4  | 417.1980  | 209.1026        |           |                  | 399.1874       | 200.0974         | D    | 1943.0345 | 972.0209        | 1926.0080 | 963.5076         | 1925.0239      | 963.0156         | 15 |
| 5  | 580.2613  | 290.6343        |           |                  | 562.2508       | 281.6290         | Y    | 1828.0076 | 914.5074        | 1810.9810 | 905.9941         | 1809.9970      | 905.5021         | 14 |
| 6  | 694.3042  | 347.6558        | 677.2777  | 339.1425         | 676.2937       | 338.6505         | N    | 1664.9442 | 832.9758        | 1647.9177 | 824.4625         | 1646.9337      | 823.9705         | 13 |
| 7  | 807.3883  | 404.1978        | 790.3618  | 395.6845         | 789.3777       | 395.1925         | I    | 1550.9013 | 775.9543        | 1533.8748 | 767.4410         | 1532.8907      | 766.9490         | 12 |
| 8  | 935.4469  | 468.2271        | 918.4203  | 459.7138         | 917.4363       | 459.2218         | Q    | 1437.8172 | 719.4123        | 1420.7907 | 710.8990         | 1419.8067      | 710.4070         | 11 |
| 9  | 1177.5848 | 589.2960        | 1160.5582 | 580.7828         | 1159.5742      | 580.2907         | K    | 1309.7587 | 655.3830        | 1292.7321 | 646.8697         | 1291.7481      | 646.3777         | 10 |
| 10 | 1306.6274 | 653.8173        | 1289.6008 | 645.3040         | 1288.6168      | 644.8120         | E    | 1067.6208 | 534.3140        | 1050.5942 | 525.8007         | 1049.6102      | 525.3087         | 9  |
| 11 | 1393.6594 | 697.3333        | 1376.6329 | 688.8201         | 1375.6488      | 688.3281         | S    | 938.5782  | 469.7927        | 921.5516  | 461.2795         | 920.5676       | 460.7874         | 8  |
| 12 | 1494.7071 | 747.8572        | 1477.6805 | 739.3439         | 1476.6965      | 738.8519         | T    | 851.5461  | 426.2767        | 834.5196  | 417.7634         | 833.5356       | 417.2714         | 7  |
| 13 | 1607.7911 | 804.3992        | 1590.7646 | 795.8859         | 1589.7806      | 795.3939         | L    | 750.4985  | 375.7529        | 733.4719  | 367.2396         |                |                  | 6  |
| 14 | 1744.8501 | 872.9287        | 1727.8235 | 864.4154         | 1726.8395      | 863.9234         | H    | 637.4144  | 319.2108        | 620.3879  | 310.6976         |                |                  | 5  |
| 15 | 1857.9341 | 929.4707        | 1840.9076 | 920.9574         | 1839.9236      | 920.4654         | L    | 500.3555  | 250.6814        | 483.3289  | 242.1681         |                |                  | 4  |
| 16 | 1957.0025 | 979.0049        | 1939.9760 | 970.4916         | 1938.9920      | 969.9996         | V    | 387.2714  | 194.1394        | 370.2449  | 185.6261         |                |                  | 3  |
| 17 | 2070.0866 | 1035.5469       | 2053.0600 | 1027.0337        | 2052.0760      | 1026.5417        | L    | 288.2030  | 144.6051        | 271.1765  | 136.0919         |                |                  | 2  |
| 18 |           |                 |           |                  |                |                  | R    | 175.1190  | 88.0631         | 158.0924  | 79.5498          |                |                  | 1  |

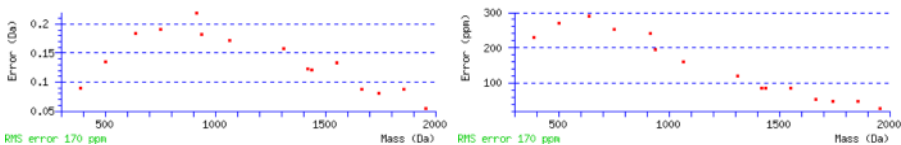

NCBI BLAST search of **TLSDYNIQKESTLHLVLR**  
 (Parameters: blastp, nr protein database, expect=20000, no filter, PAM30)  
 Other BLAST [web gateways](#)

**All matches to this query**

| Score | Mr(calc): | Delta   | Sequence                              |
|-------|-----------|---------|---------------------------------------|
| 83.0  | 2243.1910 | 0.2725  | <a href="#">TLSDYNIQKESTLHLVLR</a>    |
| 20.6  | 2244.1175 | -0.6540 | <a href="#">VSDYTAFINQGKLEIYNR</a>    |
| 17.3  | 2244.0555 | -0.5920 | <a href="#">CKPPPNLQILDPYMDGQK</a>    |
| 16.7  | 2244.0191 | -0.5556 | <a href="#">SMEDLVNEFEKLVNCFR</a>     |
| 16.3  | 2243.1011 | 0.3624  | <a href="#">KEFFLWSEIEIRNFOK</a>      |
| 16.1  | 2242.9882 | 0.4753  | <a href="#">RMGRYCGADMPPTGTTGSK</a>   |
| 15.4  | 2243.1580 | 0.3055  | <a href="#">SIGNTISPOQVMNKLGGDILR</a> |
| 15.1  | 2244.0811 | -0.6176 | <a href="#">YFAIAIQIQDOAESYADRK</a>   |
| 14.4  | 2243.2677 | 0.1957  | <a href="#">NLKIGYENLFIQVPIVR</a>     |
| 14.3  | 2243.0865 | 0.3769  | <a href="#">DPGAVRNPNQOYPSFLMRR</a>   |

# MASCOT Search Results

## Protein View

Match to: **YD\_RFP-BARD-BRCA-Ub** Score: **1819**  
YD\_RFP-BARD-BRCA-Ub  
Found in search of C:\YaelDavid\100203\_YaelDavid\BIT00881\_YD\_20\_merge.mgf

Nominal mass (M<sub>r</sub>): **60628**; Calculated pI value: **6.10**  
NCBI BLAST search of **YD\_RFP-BARD-BRCA-Ub** against nr  
Unformatted [sequence string](#) for pasting into other applications

Fixed modifications: Carbamidomethyl (C)  
Variable modifications: GlyGly (K), Oxidation (M)  
Cleavage by Trypsin: cuts C-term side of KR unless next residue is P  
Sequence Coverage: **43%**

Matched peptides shown in **Bold Red**

1 MHHHHHHASS EDVIKEFMRP KVR**MEGSVNG HEFEIEGEGE GRPYEGTQTA**  
51 **KLKVTKGGPL PFAMWLLSPQ FQYGSKAYVK HPADIPDYLK LSPFEGFKWE**  
101 **RVNMFEDGGV VVTQDSSLQ DGEFIYKVKL RGTNFPDGGP VMQKRTMGWE**  
151 **ASTERMYPED GALKGEIKMR LKLEKGGHYD AEVKTYMAK KPVQLPGAYK**  
201 **TDIKLDITSH NEDYTIYEQR ERAEGRHSYG AENLIFQGLE EFDGGAWAH**  
251 **SRAALDRLEK LLRCSLRNII LRPEVCLGGC EHLTFCNSVVS DCIQTGCPVC**  
301 **YTPAWIQDLK INRQLDSMIQ LCSKLRLNLL DNELSDLEKED GSGGDLALS**  
351 **RVEEVQNVIN AMQKILECPH CLELLKEPVS TKCDHIFCKP CMLKLLNQKK**  
401 **GPSQCPLEKN DITKRSLQES TRFSQLAEEL LKILICAFQLD TGLEAYNSYN**  
451 **FAKQIFVKTLT TGGTITLVEV PSDTIENVKA KIQDKEGIPP DQQRILFAGK**  
501 **QLEGGRTLSD YNIQKESTLH LVLRRLRGG**

Show predicted peptides also

Sort Peptides By  Residue Number  Increasing Mass  Decreasing Mass

| Start - End | Observed  | Mr (expt) | Mr (calc) | Delta   | Miss | Sequence                                                                        |
|-------------|-----------|-----------|-----------|---------|------|---------------------------------------------------------------------------------|
| 24 - 51     | 1528.2220 | 3054.4294 | 3053.3309 | 1.0986  | 0    | R.MEGSVNGHEFEIEGEGEGRPYEGTQAK.L Oxidation (M) ( <a href="#">Ions score 26</a> ) |
| 57 - 76     | 1104.1910 | 2206.3674 | 2207.1051 | -0.7377 | 0    | K.GGPLPFAWDLSPQFQYGSK.A ( <a href="#">Ions score 67</a> )                       |
| 57 - 76     | 1104.6640 | 2207.3134 | 2207.1051 | 0.2083  | 0    | K.GGPLPFAWDLSPQFQYGSK.A ( <a href="#">Ions score 71</a> )                       |
| 57 - 76     | 1104.6980 | 2207.3814 | 2207.1051 | 0.2763  | 0    | K.GGPLPFAWDLSPQFQYGSK.A ( <a href="#">Ions score 68</a> )                       |
| 81 - 90     | 584.3630  | 1166.7114 | 1167.5924 | -0.8810 | 0    | K.HPADIPDYLK.L ( <a href="#">Ions score 38</a> )                                |
| 91 - 98     | 462.8260  | 923.6374  | 923.4753  | 0.1622  | 0    | K.LSPFEGFK.W ( <a href="#">Ions score 36</a> )                                  |
| 91 - 98     | 462.8590  | 923.7034  | 923.4753  | 0.2282  | 0    | K.LSPFEGFK.W ( <a href="#">Ions score 37</a> )                                  |
| 91 - 101    | 698.5600  | 1395.1054 | 1394.6983 | 0.4072  | 1    | K.LSPFEGFKWER.V ( <a href="#">Ions score 45</a> )                               |
| 102 - 127   | 1439.8170 | 2877.6194 | 2877.3379 | 0.2816  | 0    | R.VNMFEDGGVVTVTQDSSLQDGEFIYK.V ( <a href="#">Ions score 70</a> )                |
| 102 - 127   | 1439.8220 | 2877.6294 | 2877.3379 | 0.2916  | 0    | R.VNMFEDGGVVTVTQDSSLQDGEFIYK.V ( <a href="#">Ions score 74</a> )                |
| 102 - 127   | 965.6240  | 2893.8502 | 2893.3328 | 0.5174  | 0    | R.VNMFEDGGVVTVTQDSSLQDGEFIYK.V Oxidation (M) ( <a href="#">Ions score 57</a> )  |
| 102 - 127   | 1448.2330 | 2894.4514 | 2893.3328 | 1.1186  | 0    | R.VNMFEDGGVVTVTQDSSLQDGEFIYK.V Oxidation (M) ( <a href="#">Ions score 83</a> )  |
| 102 - 127   | 1448.2500 | 2894.4854 | 2893.3328 | 1.1526  | 0    | R.VNMFEDGGVVTVTQDSSLQDGEFIYK.V Oxidation (M) ( <a href="#">Ions score 67</a> )  |
| 102 - 127   | 1448.2520 | 2894.4894 | 2893.3328 | 1.1566  | 0    | R.VNMFEDGGVVTVTQDSSLQDGEFIYK.V Oxidation (M) ( <a href="#">Ions score 81</a> )  |
| 132 - 144   | 689.4060  | 1376.7974 | 1376.6395 | 0.1580  | 0    | R.GTNFPDGGVPMQK.K ( <a href="#">Ions score 77</a> )                             |
| 132 - 144   | 689.4190  | 1376.8234 | 1376.6395 | 0.1840  | 0    | R.GTNFPDGGVPMQK.K ( <a href="#">Ions score 70</a> )                             |
| 132 - 144   | 697.4970  | 1392.9794 | 1392.6344 | 0.3451  | 0    | R.GTNFPDGGVPMQK.K Oxidation (M) ( <a href="#">Ions score 52</a> )               |
| 132 - 144   | 697.5000  | 1392.9854 | 1392.6344 | 0.3511  | 0    | R.GTNFPDGGVPMQK.K Oxidation (M) ( <a href="#">Ions score 65</a> )               |
| 146 - 155   | 592.2860  | 1182.5574 | 1182.4975 | 0.0599  | 0    | K.TMGWEASTER.M Oxidation (M) ( <a href="#">Ions score 53</a> )                  |
| 146 - 155   | 592.3450  | 1182.6754 | 1182.4975 | 0.1779  | 0    | K.TMGWEASTER.M Oxidation (M) ( <a href="#">Ions score 62</a> )                  |
| 191 - 200   | 550.9270  | 1099.8394 | 1099.6390 | 0.2005  | 0    | K.KPVQLPGAYK.T ( <a href="#">Ions score 48</a> )                                |
| 205 - 222   | 1112.6660 | 2223.3174 | 2224.0284 | -0.7109 | 0    | K.LDITSHNEDYTIYEYER.A ( <a href="#">Ions score 30</a> )                         |
| 205 - 222   | 1112.7170 | 2223.4194 | 2224.0284 | -0.6089 | 0    | K.LDITSHNEDYTIYEYER.A ( <a href="#">Ions score 18</a> )                         |
| 205 - 222   | 742.4500  | 2224.3282 | 2224.0284 | 0.2998  | 0    | K.LDITSHNEDYTIYEYER.A ( <a href="#">Ions score 44</a> )                         |
| 205 - 222   | 1113.2170 | 2224.4194 | 2224.0284 | 0.3911  | 0    | K.LDITSHNEDYTIYEYER.A ( <a href="#">Ions score 107</a> )                        |
| 205 - 222   | 742.5340  | 2224.5802 | 2224.0284 | 0.5518  | 0    | K.LDITSHNEDYTIYEYER.A ( <a href="#">Ions score 24</a> )                         |
| 205 - 222   | 1113.6120 | 2225.2094 | 2224.0284 | 1.1811  | 0    | K.LDITSHNEDYTIYEYER.A ( <a href="#">Ions score 52</a> )                         |
| 205 - 222   | 1113.6170 | 2225.2194 | 2224.0284 | 1.1911  | 0    | K.LDITSHNEDYTIYEYER.A ( <a href="#">Ions score 106</a> )                        |
| 205 - 222   | 1113.6380 | 2225.2614 | 2224.0284 | 1.2331  | 0    | K.LDITSHNEDYTIYEYER.A ( <a href="#">Ions score 110</a> )                        |
| 205 - 222   | 1113.7330 | 2225.4514 | 2224.0284 | 1.4231  | 0    | K.LDITSHNEDYTIYEYER.A ( <a href="#">Ions score 42</a> )                         |
| 227 - 245   | 1060.6330 | 2119.2514 | 2118.9606 | 0.2908  | 0    | R.HSTGAENLYFQGLEEPDGR.G ( <a href="#">Ions score 105</a> )                      |
| 227 - 245   | 707.4840  | 2119.4302 | 2118.9606 | 0.4695  | 0    | R.HSTGAENLYFQGLEEPDGR.G ( <a href="#">Ions score 68</a> )                       |
| 227 - 245   | 1060.7430 | 2119.4714 | 2118.9606 | 0.5108  | 0    | R.HSTGAENLYFQGLEEPDGR.G ( <a href="#">Ions score 117</a> )                      |
| 227 - 245   | 1060.7480 | 2119.4814 | 2118.9606 | 0.5208  | 0    | R.HSTGAENLYFQGLEEPDGR.G ( <a href="#">Ions score 102</a> )                      |
| 227 - 245   | 707.5200  | 2119.5382 | 2118.9606 | 0.5775  | 0    | R.HSTGAENLYFQGLEEPDGR.G ( <a href="#">Ions score 66</a> )                       |
| 327 - 338   | 705.9630  | 1409.9114 | 1409.7150 | 0.1964  | 0    | R.NLLHDNELSDLK.E ( <a href="#">Ions score 65</a> )                              |
| 327 - 338   | 706.0440  | 1410.0734 | 1409.7150 | 0.3584  | 0    | R.NLLHDNELSDLK.E ( <a href="#">Ions score 67</a> )                              |
| 327 - 351   | 1313.2640 | 2624.5134 | 2624.2678 | 0.2457  | 1    | R.NLLHDNELSDLKEDGGSGDLSALR.V ( <a href="#">Ions score 137</a> )                 |
| 327 - 351   | 1313.4110 | 2624.8074 | 2624.2678 | 0.5397  | 1    | R.NLLHDNELSDLKEDGGSGDLSALR.V ( <a href="#">Ions score 123</a> )                 |
| 327 - 351   | 875.9760  | 2624.9062 | 2624.2678 | 0.6384  | 1    | R.NLLHDNELSDLKEDGGSGDLSALR.V ( <a href="#">Ions score 101</a> )                 |
| 339 - 351   | 617.3600  | 1232.7054 | 1232.5633 | 0.1421  | 0    | K.EDGGSGDLSALR.V ( <a href="#">Ions score 94</a> )                              |
| 339 - 351   | 617.3640  | 1232.7134 | 1232.5633 | 0.1501  | 0    | K.EDGGSGDLSALR.V ( <a href="#">Ions score 84</a> )                              |
| 339 - 351   | 617.4200  | 1232.8254 | 1232.5633 | 0.2621  | 0    | K.EDGGSGDLSALR.V ( <a href="#">Ions score 84</a> )                              |
| 352 - 364   | 751.5560  | 1501.0974 | 1500.7606 | 0.3368  | 0    | R.VEEVQNVINAMQK.I ( <a href="#">Ions score 102</a> )                            |
| 352 - 364   | 751.5590  | 1501.1034 | 1500.7606 | 0.3428  | 0    | R.VEEVQNVINAMQK.I ( <a href="#">Ions score 102</a> )                            |
| 352 - 364   | 759.4520  | 1516.8894 | 1516.7555 | 0.1339  | 0    | R.VEEVQNVINAMQK.I Oxidation (M) ( <a href="#">Ions score 98</a> )               |
| 352 - 364   | 759.4580  | 1516.9014 | 1516.7555 | 0.1459  | 0    | R.VEEVQNVINAMQK.I Oxidation (M) ( <a href="#">Ions score 99</a> )               |
| 352 - 364   | 759.5330  | 1517.0514 | 1516.7555 | 0.2959  | 0    | R.VEEVQNVINAMQK.I Oxidation (M) ( <a href="#">Ions score 82</a> )               |
| 352 - 364   | 759.5340  | 1517.0534 | 1516.7555 | 0.2979  | 0    | R.VEEVQNVINAMQK.I Oxidation (M) ( <a href="#">Ions score 98</a> )               |
| 423 - 432   | 603.4160  | 1204.8174 | 1204.6703 | 0.1471  | 0    | R.FSQLVEELLK.I ( <a href="#">Ions score 85</a> )                                |
| 423 - 432   | 603.4870  | 1204.9594 | 1204.6703 | 0.2891  | 0    | R.FSQLVEELLK.I ( <a href="#">Ions score 71</a> )                                |
| 507 - 515   | 541.3640  | 1080.7134 | 1080.5451 | 0.1683  | 0    | R.TLSDYNIQK.E ( <a href="#">Ions score 57</a> )                                 |
| 507 - 515   | 541.3690  | 1080.7234 | 1080.5451 | 0.1783  | 0    | R.TLSDYNIQK.E ( <a href="#">Ions score 30</a> )                                 |
| 516 - 524   | 534.4010  | 1066.7874 | 1066.6135 | 0.1740  | 0    | K.ESTLHLVLR.L ( <a href="#">Ions score 34</a> )                                 |

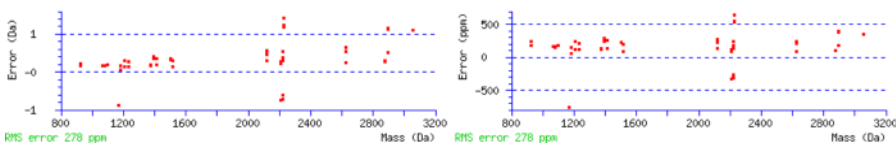

MASCOT SEARCH RESULTS

Protein View

Match to: YD\_RFP-BARD-BRCA-Ub Score: 2003
YD\_RFP-BARD-BRCA-Ub
Found in search of C:\YaelDavid\100203\_YaelDavid\BIT00883\_YD\_21\_merge.mgf

Nominal mass (Mr): 60628; Calculated pI value: 6.10
NCBI BLAST search of YD\_RFP-BARD-BRCA-Ub against nr
Unformatted sequence string for pasting into other applications

Fixed modifications: Carbamidomethyl (C)
Variable modifications: GlyGly (K), Oxidation (M)
Cleavage by Trypsin: cuts C-term side of KR unless next residue is P
Sequence Coverage: 54%

Matched peptides shown in Bold Red

1 MHHHHHHASS EDVKEFMRF KVRMEGVSNG HEFEIEGEGR PRPEYGTQTA
51 KLRKVTKGGPL PFAMWLLSPQ FQYGSKAYVK HPADIPDYLK LSFPEGFKWE
101 RVMNFDGGV VVTQDSSLQ DGEFFLYKVKL RGTNFPDGP VMQKRTMGWE
151 ASYERMPED GALKGEIKMR LKLDGGHVD AEWKTYMAK KPVQLPGAYK
201 TDIKLDTSH NEDYTVQYR ERAEGRHSYG AENLTFQGLE EFDGRGAWAH
251 SRALLDLRK LRLCSKRWII LREPVCLGCG EHTFGSCVVS DCIQTGCPVC
301 VTPAWIQDLK INRQDLSMIQ LCSKRLNLLH DNELSDLKED GSGGDDLSAL
351 RVEEVQNVIN AMQKILECPI CLELKEPVV TKCDHIFCKF CMLKLLNQQK
401 GFSQCLPCKN DITKRSLQES TRFSQVLEVK LKILICAFQLD TGLEANSYN
451 FAKQIFVKTL TQKTTILEVE PSDTIENVKA KIQDKREGIP DQRLIFAGK
501 QLEDGRITLD YNIQKESTLH LVLRRLRGG

Show predicted peptides also

Sort Peptides By Residue Number Increasing Mass Decreasing Mass

Table with columns: Start, End, Observed, Mr (expt), Mr (calc), Delta, Miss, Sequence. Contains search results for various peptides with their observed and calculated masses and scores.

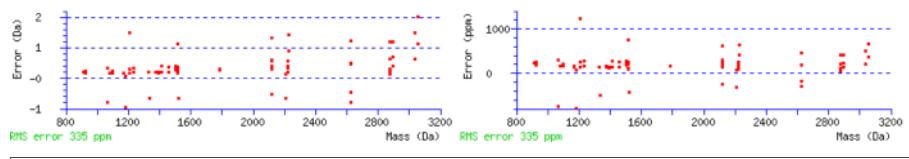

Mascot: <http://www.matrixscience.com/>

**(MATRIX) (SCIENCE) Mascot Search Results**

**Peptide View**

MS/MS Fragmentation of **LIFAGKQLEDGR**

Found in **YD\_RFP-BARD-BRCA-Ub**, YD\_RFP-BARD-BRCA-Ub

Match to Query 128: 1460.141448 from (731.078000,2+) intensity(7836799.0000)

Title: Cmpd 58, +MSn(731.45), 22.6 min

Data file C:\YaelDavid\100203\_YaelDavid\BIT00883\_YD\_21\_merge.mgf

Click mouse within plot area to zoom in by factor of two about that point

Or, Plot from 200 to 1300 Da Full range

Label all possible matches  Label matches used for scoring

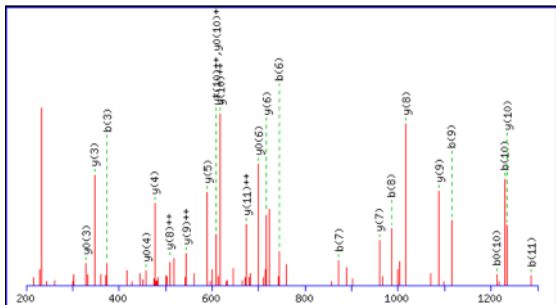

Monoisotopic mass of neutral peptide Mr(calc): 1459.7783

Fixed modifications: Carbamidomethyl (C) (apply to specified residues or termini only)

Variable modifications:

K6 : GlyGly (K)

Ions Score: 71 Expect: 0.0001

Matches : 25/102 Fragment ions using 31 most intense peaks (help)

| #  | b         | b <sup>++</sup> | b*        | b <sup>*++</sup> | b <sup>0</sup> | b <sup>0++</sup> | Seq. | y         | y <sup>++</sup> | y*        | y <sup>*++</sup> | y <sup>0</sup> | y <sup>0++</sup> | #  |
|----|-----------|-----------------|-----------|------------------|----------------|------------------|------|-----------|-----------------|-----------|------------------|----------------|------------------|----|
| 1  | 114.0913  | 57.5493         |           |                  |                |                  | L    |           |                 |           |                  |                |                  | 12 |
| 2  | 227.1754  | 114.0913        |           |                  |                |                  | I    | 1347.7015 | 674.3544        | 1330.6750 | 665.8411         | 1329.6910      | 665.3491         | 11 |
| 3  | 374.2438  | 187.6255        |           |                  |                |                  | F    | 1234.6175 | 617.8124        | 1217.5909 | 609.2991         | 1216.6069      | 608.8071         | 10 |
| 4  | 445.2809  | 223.1441        |           |                  |                |                  | A    | 1087.5491 | 544.2782        | 1070.5225 | 535.7649         | 1069.5385      | 535.2729         | 9  |
| 5  | 502.3024  | 251.6548        |           |                  |                |                  | G    | 1016.5119 | 508.7596        | 999.4854  | 500.2463         | 998.5014       | 499.7543         | 8  |
| 6  | 744.4403  | 372.7238        | 727.4137  | 364.2105         |                |                  | K    | 959.4905  | 480.2489        | 942.4639  | 471.7356         | 941.4799       | 471.2436         | 7  |
| 7  | 872.4989  | 436.7531        | 855.4723  | 428.2398         |                |                  | Q    | 717.3526  | 359.1799        | 700.3260  | 350.6667         | 699.3420       | 350.1747         | 6  |
| 8  | 985.5829  | 493.2951        | 968.5564  | 484.7818         |                |                  | L    | 589.2940  | 295.1506        | 572.2675  | 286.6374         | 571.2835       | 286.1454         | 5  |
| 9  | 1114.6255 | 557.8164        | 1097.5990 | 549.3031         | 1096.6150      | 548.8111         | E    | 476.2100  | 238.6086        | 459.1834  | 230.0953         | 458.1994       | 229.6033         | 4  |
| 10 | 1229.6525 | 615.3299        | 1212.6259 | 606.8166         | 1211.6419      | 606.3246         | D    | 347.1674  | 174.0873        | 330.1408  | 165.5740         | 329.1568       | 165.0820         | 3  |
| 11 | 1286.6739 | 643.8406        | 1269.6474 | 635.3273         | 1268.6634      | 634.8353         | G    | 232.1404  | 116.5738        | 215.1139  | 108.0606         |                |                  | 2  |
| 12 |           |                 |           |                  |                |                  | R    | 175.1190  | 88.0631         | 158.0924  | 79.5498          |                |                  | 1  |

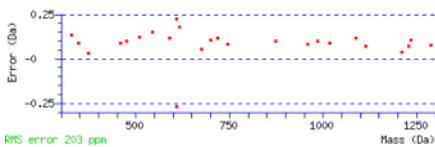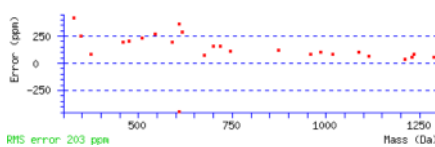

NCBI BLAST search of **LIFAGKQLEDGR**

(Parameters: blastp, nr protein database, expect=20000, no filter, PAM30)

Other BLAST [web gateways](#)

**All matches to this query**

| Score | Mr(calc): | Delta   | Sequence                      |
|-------|-----------|---------|-------------------------------|
| 71.4  | 1459.7783 | 0.3631  | <a href="#">LIFAGKQLEDGR</a>  |
| 28.0  | 1460.7987 | -0.6573 | <a href="#">AGVFKKVDEIK</a>   |
| 28.0  | 1460.7987 | -0.6573 | <a href="#">AGVFKKVDELK</a>   |
| 25.8  | 1459.6725 | 0.4689  | <a href="#">EAAALQCQLEDGR</a> |
| 22.7  | 1459.8068 | 0.3347  | <a href="#">ILQEKMEKAIK</a>   |
| 22.5  | 1459.8432 | 0.2982  | <a href="#">MNITITVGGKIK</a>  |
| 22.5  | 1459.8432 | 0.2982  | <a href="#">MNITLITVGGKIK</a> |
| 22.4  | 1460.7544 | -0.6130 | <a href="#">NIIEMQOLELSK</a>  |
| 21.9  | 1459.7704 | 0.3710  | <a href="#">EMKLLLEQSGALK</a> |
| 21.4  | 1459.7307 | 0.4108  | <a href="#">ALENALPYLEDGR</a> |

Mascot: <http://www.matrixscience.com/>

| Referenc #10 |                                              | P (pro)    |          |   |      |          | Sf    | Score  | Coverage | MW      | Acsn.    | Peptide (Hits)  |       |
|--------------|----------------------------------------------|------------|----------|---|------|----------|-------|--------|----------|---------|----------|-----------------|-------|
| Scan(s)      | Peptide                                      | MH+        | DeltaM   | z | Type | P (pep)  | Sf    | XC     | DeltaCn  | Sp      | RSp      | Ions            | Count |
| 1            | RFP-BARD-BRCA                                |            |          |   |      | 7.77E-15 | 35.35 | 456.27 | 58.40    | 51667.6 |          | 46 (44 2 0 0 0) |       |
| 5890         | K.AYVKHPADIPDYK.L                            | 1629.86352 | -0.57436 | 3 | CID  | 6.83E-10 | 0.93  | 3.31   | 0.60     | 1092.2  | 1        | 25/52           | 1     |
| 1317         | K.DGGHYDAEVK.T                               | 1090.47998 | 1.54412  | 3 | CID  | 3.57E-02 | 0.66  | 2.50   | 0.46     | 307.5   | 1        | 16/36           | 1     |
| 4271         | K.EDGGSGDLSALR.V                             | 1233.57058 | 0.41172  | 2 | CID  | 4.91E-05 | 0.87  | 2.41   | 0.61     | 748.8   | 1        | 14/24           |       |
| 7392         | K.FCM*LK~LLNQK.K                             | 1353.70196 | 1.16483  | 2 | CID  | 2.64E-02 | 0.62  | 2.17   | 0.33     | 221.0   | 1        | 11/18           |       |
| 10336        | R.FSQLVEELLK.I                               | 1205.67762 | 1.65647  | 2 | CID  | 1.18E-06 | 0.97  | 2.85   | 0.77     | 1543.1  | 1        | 16/18           |       |
| 12893        | K.GGPLPFAWDILSPQFQ.Y                         | 1772.90063 | 0.37217  | 2 | CID  | 5.42E-08 | 0.85  | 2.50   | 0.58     | 587.4   | 1        | 16/30           | 1     |
| 12347        | K.GGPLPFAWDILSPQFQYGSK.A                     | 2208.11242 | 1.40825  | 2 | CID  | 8.70E-11 | 0.86  | 2.72   | 0.30     | 1038.0  | 1        | 20/38           | 1     |
| 905          | G.GHYDAEVK.T                                 | 918.43157  | -1.53485 | 2 | CID  | 4.48E-02 | 0.85  | 2.34   | 0.40     | 565.0   | 1        | 11/14           | 1     |
| 1047         | H.HASSEDVIK.E                                | 985.49490  | 1.50683  | 2 | CID  | 3.40E-04 | 0.88  | 2.08   | 0.67     | 508.9   | 1        | 12/16           | 1     |
| 5847         | K.HPADIPDYK.L                                | 1168.59970 | 0.17217  | 2 | CID  | 9.26E-07 | 0.90  | 2.11   | 0.80     | 259.5   | 1        | 14/18           | 1     |
| 10950        | K.HPADIPDYK~LSFPEGFK.W                       | 2117.07040 | 2.30828  | 3 | CID  | 8.29E-05 | 0.59  | 2.63   | 0.38     | 407.5   | 1        | 18/68           | 2     |
| 8072         | R.HSTGAENLYFQGLEE.E                          | 1694.76566 | -0.78226 | 2 | CID  | 4.07E-04 | 0.72  | 2.08   | 0.61     | 485.3   | 1        | 12/28           | 1     |
| 7313         | R.HSTGAENLYFQGLEEPDGR.G                      | 2119.96794 | 0.52103  | 2 | CID  | 7.77E-15 | 0.98  | 5.44   | 0.65     | 1388.3  | 1        | 22/36           |       |
| 7289         | R.HSTGAENLYFQGLEEPDGRG.A                     | 2176.98940 | 0.29258  | 2 | CID  | 4.09E-08 | 0.89  | 2.86   | 0.69     | 479.6   | 1        | 18/38           |       |
| 11236        | K.IICAFQLDTGLEANSYNFAK.E                     | 2438.16971 | 1.70867  | 2 | CID  | 8.88E-15 | 0.98  | 4.77   | 0.45     | 2172.8  | 1        | 25/40           |       |
| 10896        | K.IICAFQLDTGLEAN@SYNFAK.E                    | 2439.15373 | 1.15451  | 2 | CID  | 4.92E-10 | 0.85  | 2.71   | 0.03     | 1606.6  | 1        | 21/40           |       |
| 1449         | L.KDGGHYDAEVK.T                              | 1218.57494 | 0.54768  | 2 | CID  | 1.12E-05 | 0.53  | 2.10   | 0.39     | 336.9   | 1        | 10/20           | 1     |
| 1083         | K.KGPSQCPLCK.N                               | 1174.57080 | -0.16445 | 2 | CID  | 1.56E-05 | 0.90  | 2.85   | 0.55     | 670.4   | 1        | 12/18           |       |
| 1424         | K.KGPSQ@CPLCK.N                              | 1175.55481 | -2.03958 | 2 | CID  | 3.02E-01 | 0.56  | 2.47   | 0.48     | 202.6   | 1        | 8/18            |       |
| 8105         | K.LDITSHN@EDYTIVEQYER.A                      | 2226.01970 | 0.60437  | 2 | CID  | 5.17E-11 | 0.75  | 2.53   | 0.14     | 891.0   | 1        | 18/34           | 1     |
| 1444         | K.LK~D^GGHYDAEVK.T                           | 1388.68066 | 0.47982  | 2 | CID  | 3.10E-02 | 0.62  | 2.43   | 0.43     | 185.4   | 1        | 11/22           | 2     |
| 1385         | K.LKDGGHYDAEVK.T                             | 1331.65901 | -1.30028 | 2 | CID  | 7.07E-08 | 0.95  | 3.50   | 0.44     | 1360.1  | 1        | 17/22           | 1     |
| 1629         | K.LK#DGGHYDAEVK.T                            | 1445.70091 | -0.37402 | 2 | CID  | 1.59E-03 | 0.82  | 2.89   | 0.41     | 476.4   | 1        | 13/22           | 1     |
| 7272         | N.LLHDNELSDLKEDGGSGDLSALR.V                  | 2511.23215 | -0.36435 | 3 | CID  | 5.01E-09 | 0.79  | 3.48   | 0.55     | 245.2   | 1        | 21/92           |       |
| 5905         | R.MEGSVNGHEFEIEGEGGRPYEGTQAK.L               | 3038.34323 | 1.78824  | 3 | CID  | 4.51E-12 | 0.61  | 2.52   | 0.36     | 448.6   | 1        | 24/108          | 1     |
| 6850         | H.NEDYTIVEQYER.A                             | 1558.70199 | 0.44372  | 2 | CID  | 3.40E-10 | 0.96  | 2.85   | 0.77     | 1195.5  | 1        | 17/22           | 1     |
| 6524         | R.NLLHDNELSDLK.E                             | 1410.72233 | 3.89629  | 2 | CID  | 3.33E-05 | 0.81  | 2.62   | 0.32     | 647.2   | 1        | 14/22           |       |
| 6699         | R.NLLHDNELSDLKED.G                           | 1654.79187 | 1.50400  | 2 | CID  | 4.99E-06 | 0.76  | 2.80   | 0.21     | 757.2   | 1        | 14/26           |       |
| 9082         | R.NLLHDNELSDLK~EDGGSGDLSALR.V                | 2668.28108 | 3.66863  | 3 | CID  | 4.25E-07 | 0.73  | 3.73   | 0.06     | 908.3   | 1        | 27/96           |       |
| 8235         | R.NLLHDNELSDLKEDGGSGDLSALR.V                 | 2625.27508 | 3.24757  | 3 | CID  | 5.55E-11 | 0.75  | 3.60   | 0.20     | 666.6   | 1        | 25/96           |       |
| 10980        | R.NLLHDNELSDLKEDGGSGDLSALRVEEVQN             | 4108.02514 | 2.11618  | 4 | CID  | 2.22E-09 | 0.66  | 3.54   | 0.25     | 347.5   | 1        | 28/222          |       |
| 6752         | H.PADIPDYK.L                                 | 1031.54079 | 1.80515  | 2 | CID  | 3.90E-05 | 0.94  | 2.65   | 0.61     | 976.4   | 1        | 14/16           | 1     |
| 6695         | T.QDSSLQDGEFIYK.V                            | 1529.71183 | 1.76245  | 2 | CID  | 4.00E-05 | 0.62  | 2.74   | 0.11     | 389.0   | 1        | 14/24           | 1     |
| 7491         | R.QLDSM*IQLCSK~LR.N                          | 1650.83041 | 3.52508  | 2 | CID  | 8.09E-04 | 0.24  | 2.22   | 0.04     | 254.6   | 1        | 11/24           |       |
| 8117         | F.QLDTGLEANSYNFAK.E                          | 1833.86537 | 1.74946  | 2 | CID  | 1.49E-05 | 0.84  | 2.84   | 0.54     | 487.3   | 1        | 15/30           |       |
| 6452         | D.SSLQDGEFIYK.V                              | 1286.62631 | 3.28937  | 2 | CID  | 1.52E-06 | 0.91  | 2.08   | 0.60     | 975.0   | 1        | 15/20           | 1     |
| 8258         | H.STGAENLYFQGLEEPDGR.G                       | 1982.90903 | 3.91865  | 2 | CID  | 8.66E-10 | 0.95  | 3.75   | 0.68     | 984.3   | 1        | 17/34           |       |
| 8268         | S.TGAENLYFQGLEEPDGR.G                        | 1895.87700 | 3.67208  | 2 | CID  | 1.37E-06 | 0.91  | 2.84   | 0.55     | 1028.4  | 1        | 17/32           |       |
| 6797         | D.TGLEAN@SYNFAK.E                            | 1478.67980 | 0.12046  | 2 | CID  | 2.83E-02 | 0.24  | 2.05   | 0.14     | 331.8   | 1        | 10/24           |       |
| 4389         | K.TM*GWEASTER.M                              | 1167.50990 | 2.74981  | 2 | CID  | 8.93E-03 | 0.88  | 2.25   | 0.55     | 693.0   | 1        | 13/18           | 1     |
| 2812         | K.TM*GWEASTER.M                              | 1183.50481 | 3.91492  | 2 | CID  | 5.67E-04 | 0.93  | 2.43   | 0.67     | 868.2   | 1        | 14/18           | 2     |
| 10304        | R.VMNFEDGGVVTQTQDSSLQDGEFIYK.V               | 2878.34513 | 2.14024  | 3 | CID  | 2.03E-06 | 0.72  | 3.09   | 0.42     | 406.8   | 1        | 22/100          | 1     |
| 6914         | T.VTQDSSLQDGEFIYK.V                          | 1729.82792 | 2.33279  | 2 | CID  | 2.45E-08 | 0.94  | 2.93   | 0.68     | 1100.2  | 1        | 17/28           | 1     |
| 5754         | L.YFQGLEEPDGR.G                              | 1310.60116 | -1.14413 | 2 | CID  | 2.34E-06 | 0.94  | 2.72   | 0.69     | 955.0   | 1        | 14/20           |       |
| 6994         | A.YVK#HPADIPDYK.L                            | 1672.86831 | 1.91421  | 2 | CID  | 5.03E-03 | 0.14  | 2.13   | 0.02     | 131.1   | 1        | 10/24           | 1     |
| 2            | gij51703339 sp P62988.1 UBIQ_HUMAN Ubiquitin |            |          |   |      | 1.10E-09 | 8.37  | 116.18 | 86.80    | 8559.6  | 51703339 | 12 (10 2 0 0 0) |       |
| 1765         | K.AKIQDKEGIPPDQQR.L                          | 1722.91332 | 3.36182  | 2 | CID  | 1.10E-09 | 0.84  | 2.72   | 0.29     | 696.1   | 1        | 18/28           |       |
| 6239         | K.ESTLHLVLR.L                                | 1067.62077 | 1.72016  | 2 | CID  | 6.75E-07 | 0.93  | 2.74   | 0.81     | 225.9   | 1        | 13/16           |       |
| 4159         | K.IQDK~EGIPPDQQR.L                           | 1566.78725 | 3.29331  | 2 | CID  | 1.11E-03 | 0.38  | 2.25   | 0.17     | 193.3   | 1        | 12/24           |       |
| 1810         | K.IQDKEGIPPDQQR.L                            | 1523.78125 | 2.91778  | 2 | CID  | 5.68E-09 | 0.93  | 3.19   | 0.63     | 566.6   | 1        | 17/24           |       |
| 1785         | K.IQD*K~EGIPPDQQR.L                          | 1580.80290 | 3.71162  | 2 | CID  | 3.93E-02 | 0.19  | 2.26   | 0.00     | 174.4   | 1        | 9/24            |       |
| 7398         | R.LIFAGK\$Q@LEDGR.T                          | 1389.74849 | 1.99789  | 2 | CID  | 4.24E-06 | 0.87  | 3.11   | 0.60     | 1138.5  | 1        | 17/22           |       |
| 7398         | R.LIFAGK~QLEDGR.T                            | 1389.74868 | 1.86549  | 2 | CID  | 1.64E-06 | 0.88  | 3.19   | 0.02     | 1138.5  | 1        | 17/22           |       |

|      |                            |            |         |   |     |          |      |      |      |       |   |       |
|------|----------------------------|------------|---------|---|-----|----------|------|------|------|-------|---|-------|
| 7763 | K.TITLEVEPSDTIEN@VK.A      | 1788.91132 | 3.33544 | 2 | CID | 3.72E-04 | 0.90 | 3.12 | 0.47 | 727.9 | 1 | 18/30 |
| 8139 | K.TITLEVEPSDTIENVK.A       | 1787.92730 | 2.65856 | 2 | CID | 1.84E-07 | 0.90 | 2.57 | 0.56 | 688.4 | 1 | 19/30 |
| 8075 | R.TLSDYNIQK#ESTLHLVLR.L    | 2244.19724 | 0.79237 | 2 | CID | 1.09E-08 | 0.72 | 2.75 | 0.12 | 814.6 | 1 | 16/34 |
| 8975 | K.TLTGK~TITLEVEPSDTIENVK.A | 2331.22915 | 1.73864 | 2 | CID | 1.27E-08 | 0.63 | 2.95 | 0.17 | 484.5 | 1 | 16/40 |
