# Supplementary material
Source: PubMed Central journal article supplement (PMC3243545)
Supplement: supp_M111.234559_FigureS7.pdf [file supp_M111.234559_FigureS7.pdf]

**MASCOT** (SCIENCE) Mascot Search Results

**Protein View**

Match to: YD\_RFP-p53 Score: 317  
 YD\_RFP-p53  
 Found in search of D:\Merge\20101018\_YD\BIT01763\_YD\_7.mgf

Nominal mass (M<sub>r</sub>): 70830; Calculated pI value: 6.14  
 NCBI BLAST search of YD\_RFP-p53 against nr  
 Unformatted [sequence string](#) for pasting into other applications

Variable modifications: Carbamidomethyl (C),Deamidated (NQ),GlyGly (K),Oxidation (M)  
 Cleavage by Trypsin: cuts C-term side of KR unless next residue is P  
 Sequence Coverage: 38%

Matched peptides shown in **Bold Red**

```

1 MHHHHHHSS EDVIKEFMRF KVRMEGSVNG HEFEIEGEGE GRPYEGTQTA
51 KLKVKTKGGPL PFAMDILLSQ FQYGSKAYVK HPADIPDYLK LSFPEGFKWE
101 RVMNFEDGGV VTVTQDSSLQ DGEFIYKVKL RGTNFPDGGP VMQKKTMGWE
151 ASTERMYPED GALKGEIKMR LKLDGGHYD AEVKTTYMAK KPVQLPGAYK
201 TDIKLDITSH NEDYITVEQY ERAEGRHSTG AENLYPQGLE EEPQSDPSVE
251 PPLSQEFTSD LMKLLPENNVL LSPFLSQAMD DLMLSPDDIE QWFTEDPSPD
301 EAPFMPEAF RYAPAPAPFT PAAPAPAPSW PLSQSVPSQK TYQGSYGFRL
351 GLFLHSGTAKS VTCYTSPLAN KMFQQLAKTC PVLQWVSTP PFGTRVAFMA
401 IYKQSQHMTF VVRCPPHHER CSDSGLAPP QHLIRVEGNL RVEYLLDRNT
451 FRHSVVVYVE PPEVGSDCIT IHNYMKNSS CMGGMRRFI LTIITLEDSS
501 GNLLGRNSFE VHVCACPGRD RRTTEENLRK KGEPHLEFP GSTRKALSNN
551 TSSSPQPKKK PLDGEYFTLQ IRGRERFEMF RELNEALELK DAQAGKEFGG
601 SRAHSSHLKS KKGQSTSRHK KLMFKTEGPD SD
    
```

Show predicted peptides also

Sort Peptides By  Residue Number  Increasing Mass  Decreasing Mass

| Start | End | Observed  | Mr (expt) | Mr (calc) | Delta   | Miss | Sequence                                                                                              |
|-------|-----|-----------|-----------|-----------|---------|------|-------------------------------------------------------------------------------------------------------|
| 20    | 51  | 897.5670  | 3586.2389 | 3585.6318 | 0.6071  | 2    | R.FKVRMEGSVNGHEFEIEGEGRPRYEGTQAK.L 2 Deamidated (NQ); Oxidation (M) ( <a href="#">Ions score 24</a> ) |
| 24    | 51  | 764.7150  | 3054.8309 | 3053.3309 | 1.5000  | 0    | R.MEGSVNGHEFEIEGEGRPRYEGTQAK.L Oxidation (M) ( <a href="#">Ions score 48</a> )                        |
| 24    | 51  | 1019.1930 | 3054.5572 | 3054.3149 | 0.2423  | 0    | R.MEGSVNGHEFEIEGEGRPRYEGTQAK.L Deamidated (NQ); Oxidation (M) ( <a href="#">Ions score 44</a> )       |
| 24    | 51  | 764.7860  | 3055.1149 | 3054.3149 | 0.8000  | 0    | R.MEGSVNGHEFEIEGEGRPRYEGTQAK.L Deamidated (NQ); Oxidation (M) ( <a href="#">Ions score 50</a> )       |
| 57    | 76  | 1104.6540 | 2207.2934 | 2207.1051 | 0.1883  | 0    | K.KGGLPFAMDILLSPQFYQGSK.A ( <a href="#">Ions score 77</a> )                                           |
| 57    | 76  | 1104.7070 | 2207.3994 | 2207.1051 | 0.2943  | 0    | K.KGGLPFAMDILLSPQFYQGSK.A ( <a href="#">Ions score 58</a> )                                           |
| 57    | 76  | 736.8850  | 2207.6332 | 2207.1051 | 0.5280  | 0    | K.KGGLPFAMDILLSPQFYQGSK.A ( <a href="#">Ions score 56</a> )                                           |
| 77    | 90  | 544.0930  | 1629.2572 | 1628.8562 | 0.4010  | 1    | K.AYVKHPADIPDYLK.L ( <a href="#">Ions score 38</a> )                                                  |
| 102   | 129 | 1041.3110 | 3120.9112 | 3120.4962 | 0.4150  | 1    | R.VMNFEDGGVTVTQDSSLQDGEFIYKVK.L Oxidation (M) ( <a href="#">Ions score 106</a> )                      |
| 102   | 129 | 1041.6330 | 3121.8772 | 3121.4802 | 0.3970  | 1    | R.VMNFEDGGVTVTQDSSLQDGEFIYKVK.L Deamidated (NQ); Oxidation (M) ( <a href="#">Ions score 52</a> )      |
| 128   | 144 | 630.8050  | 1889.3932 | 1889.9669 | -0.5738 | 2    | K.VKLRGTNFPDGGPVMQK.K Deamidated (NQ); Oxidation (M) ( <a href="#">Ions score 46</a> )                |
| 130   | 144 | 555.0840  | 1662.2302 | 1661.8195 | 0.4106  | 1    | K.LRGTNFPDGGPVMQK.K Oxidation (M) ( <a href="#">Ions score 49</a> )                                   |
| 130   | 144 | 555.0980  | 1662.2722 | 1661.8195 | 0.4526  | 1    | K.LRGTNFPDGGPVMQK.K Oxidation (M) ( <a href="#">Ions score 49</a> )                                   |
| 132   | 144 | 697.4150  | 1392.8154 | 1392.6344 | 0.1811  | 0    | R.GTNFPDGGPVMQK.K Oxidation (M) ( <a href="#">Ions score 69</a> )                                     |
| 132   | 144 | 697.4410  | 1392.8674 | 1392.6344 | 0.2331  | 0    | R.GTNFPDGGPVMQK.K Oxidation (M) ( <a href="#">Ions score 68</a> )                                     |
| 132   | 145 | 508.0410  | 1521.1012 | 1520.7293 | 0.3718  | 1    | R.GTNFPDGGPVMQK.T Oxidation (M) ( <a href="#">Ions score 19</a> )                                     |
| 171   | 190 | 571.8670  | 2283.4389 | 2283.1569 | 0.2820  | 3    | R.LKLDGGHYDAEVKTTYMAK.K Oxidation (M) ( <a href="#">Ions score 38</a> )                               |
| 173   | 184 | 444.7380  | 1331.1922 | 1330.6517 | 0.5405  | 1    | K.LKLDGGHYDAEVK.T ( <a href="#">Ions score 24</a> )                                                   |
| 173   | 190 | 681.8700  | 2042.5882 | 2041.9779 | 0.6103  | 2    | K.LKLDGGHYDAEVKTTYMAK.K Oxidation (M) ( <a href="#">Ions score 51</a> )                               |
| 173   | 190 | 681.9330  | 2042.7772 | 2041.9779 | 0.7993  | 2    | K.LKLDGGHYDAEVKTTYMAK.K Oxidation (M) ( <a href="#">Ions score 58</a> )                               |
| 191   | 200 | 550.9150  | 1099.8154 | 1099.6390 | 0.1765  | 0    | K.KPVQLPGAYK.T ( <a href="#">Ions score 42</a> )                                                      |
| 191   | 200 | 550.9880  | 1099.9614 | 1099.6390 | 0.3225  | 0    | K.KPVQLPGAYK.T ( <a href="#">Ions score 39</a> )                                                      |
| 341   | 349 | 539.7050  | 1077.3954 | 1077.4880 | -0.0925 | 0    | K.TYQGSYGF.L ( <a href="#">Ions score 48</a> )                                                        |
| 341   | 349 | 539.7900  | 1077.5654 | 1077.4880 | 0.0775  | 0    | K.TYQGSYGF.L ( <a href="#">Ions score 51</a> )                                                        |
| 350   | 359 | 515.8910  | 1029.7674 | 1029.5607 | 0.2067  | 0    | R.LGFLHSGTAK.S ( <a href="#">Ions score 51</a> )                                                      |
| 350   | 359 | 515.9190  | 1029.8234 | 1029.5607 | 0.2627  | 0    | R.LGFLHSGTAK.S ( <a href="#">Ions score 37</a> )                                                      |
| 350   | 359 | 344.2970  | 1029.8692 | 1029.5607 | 0.3084  | 0    | R.LGFLHSGTAK.S ( <a href="#">Ions score 39</a> )                                                      |
| 436   | 452 | 699.8210  | 2096.4412 | 2095.0446 | 1.3965  | 2    | R.VEGNLRVEYLLDRNTFR.H ( <a href="#">Ions score 26</a> )                                               |
| 545   | 559 | 922.1320  | 1842.2494 | 1842.9183 | -0.6689 | 2    | K.RALSNNSTSSPQPKK.K Deamidated (NQ); 2 GlyGly (K) ( <a href="#">Ions score 17</a> )                   |
| 559   | 572 | 570.1230  | 1707.3472 | 1706.9355 | 0.4116  | 1    | K.KKPLDGEYFTLQIR.G ( <a href="#">Ions score 63</a> )                                                  |
| 577   | 602 | 980.5720  | 2938.6942 | 2937.4290 | 1.2652  | 3    | R.FEMFRELNEALELKDQAQAGKEPQGSR.A Oxidation (M) ( <a href="#">Ions score 46</a> )                       |
| 577   | 602 | 980.6200  | 2938.8382 | 2937.4290 | 1.4092  | 3    | R.FEMFRELNEALELKDQAQAGKEPQGSR.A Oxidation (M) ( <a href="#">Ions score 59</a> )                       |
| 619   | 632 | 824.9880  | 1647.9614 | 1647.7926 | 0.1688  | 3    | R.HKKLMFKTEGPDSD.- Oxidation (M) ( <a href="#">Ions score 19</a> )                                    |
| 619   | 632 | 550.3880  | 1648.1422 | 1647.7926 | 0.3495  | 3    | R.HKKLMFKTEGPDSD.- Oxidation (M) ( <a href="#">Ions score 24</a> )                                    |
| 621   | 632 | 692.3490  | 1382.6834 | 1382.6388 | 0.0447  | 2    | K.KLMFKTEGPDSD.- Oxidation (M) ( <a href="#">Ions score 47</a> )                                      |
| 622   | 632 | 628.3480  | 1254.6814 | 1254.5438 | 0.1376  | 1    | K.LMFKTEGPDSD.- Oxidation (M) ( <a href="#">Ions score 52</a> )                                       |

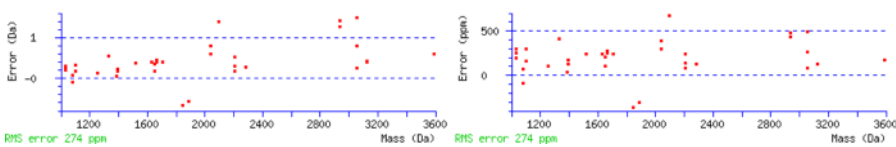

**MASCOT** **SCIENCE** Mascot Search Results

Peptide View

MS/MS Fragmentation of **RALSNNITSSSPQPKK**  
 Found in **YD\_RFP-p53**, YD\_RFP-p53

Match to Query 675: 1842.249448 from(922.132000,2+) intensity(16649.0000)  
 Title: Cmpd 262, +MSn(922.65), 35.4 min  
 Data file D:\Merge\20101018\_YD\BIT01763\_YD\_7.mgf

Click mouse within plot area to zoom in by factor of two about that point

Or, Plot from 400 to 1150 Da Full range

Label all possible matches  Label matches used for scoring

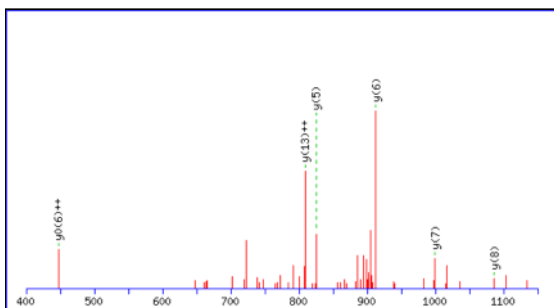

Monoisotopic mass of neutral peptide Mr(calc): 1842.9183

Variable modifications:

- N6 : Deamidated (NQ)
- K14 : GlyGly (K)
- K15 : GlyGly (K)

Ions Score: 17 Expect: 3.8

Matches : 6/152 fragment ions using 11 most intense peaks [\(help\)](#)

| #  | b         | b <sup>++</sup> | b*        | b <sup>s++</sup> | b <sup>0</sup> | b <sup>0++</sup> | Seq. | y         | y <sup>++</sup> | y*        | y <sup>s++</sup> | y <sup>0</sup> | y <sup>0++</sup> | #  |
|----|-----------|-----------------|-----------|------------------|----------------|------------------|------|-----------|-----------------|-----------|------------------|----------------|------------------|----|
| 1  | 157.1084  | 79.0578         | 140.0818  | 70.5446          |                |                  | R    |           |                 |           |                  |                |                  | 15 |
| 2  | 228.1455  | 114.5764        | 211.1190  | 106.0631         |                |                  | A    | 1687.8246 | 844.4159        | 1670.7980 | 835.9026         | 1669.8140      | 835.4106         | 14 |
| 3  | 341.2296  | 171.1184        | 324.2030  | 162.6051         |                |                  | L    | 1616.7875 | 808.8974        | 1599.7609 | 800.3841         | 1598.7769      | 799.8921         | 13 |
| 4  | 428.2616  | 214.6344        | 411.2350  | 206.1212         | 410.2510       | 205.6292         | S    | 1503.7034 | 752.3553        | 1486.6768 | 743.8421         | 1485.6928      | 743.3500         | 12 |
| 5  | 542.3045  | 271.6559        | 525.2780  | 263.1426         | 524.2940       | 262.6506         | N    | 1416.6714 | 708.8393        | 1399.6448 | 700.3260         | 1398.6608      | 699.8340         | 11 |
| 6  | 657.3315  | 329.1694        | 640.3049  | 320.6561         | 639.3209       | 320.1641         | N    | 1302.6284 | 651.8179        | 1285.6019 | 643.3046         | 1284.6179      | 642.8126         | 10 |
| 7  | 758.3791  | 379.6932        | 741.3526  | 371.1799         | 740.3686       | 370.6879         | T    | 1187.6015 | 594.3044        | 1170.5749 | 585.7911         | 1169.5909      | 585.2991         | 9  |
| 8  | 845.4112  | 423.2092        | 828.3846  | 414.6959         | 827.4006       | 414.2039         | S    | 1086.5538 | 543.7805        | 1069.5273 | 535.2673         | 1068.5432      | 534.7753         | 8  |
| 9  | 932.4432  | 466.7252        | 915.4166  | 458.2120         | 914.4326       | 457.7200         | S    | 999.5218  | 500.2645        | 982.4952  | 491.7513         | 981.5112       | 491.2592         | 7  |
| 10 | 1019.4752 | 510.2413        | 1002.4487 | 501.7280         | 1001.4647      | 501.2360         | S    | 912.4898  | 456.7485        | 895.4632  | 448.2352         | 894.4792       | 447.7432         | 6  |
| 11 | 1116.5280 | 558.7676        | 1099.5014 | 550.2544         | 1098.5174      | 549.7624         | P    | 825.4577  | 413.2325        | 808.4312  | 404.7192         |                |                  | 5  |
| 12 | 1244.5866 | 622.7969        | 1227.5600 | 614.2836         | 1226.5760      | 613.7916         | Q    | 728.4050  | 364.7061        | 711.3784  | 356.1928         |                |                  | 4  |
| 13 | 1341.6393 | 671.3233        | 1324.6128 | 662.8100         | 1323.6288      | 662.3180         | P    | 600.3464  | 300.6768        | 583.3198  | 292.1636         |                |                  | 3  |
| 14 | 1583.7772 | 792.3922        | 1566.7507 | 783.8790         | 1565.7667      | 783.3870         | K    | 503.2936  | 252.1504        | 486.2671  | 243.6372         |                |                  | 2  |
| 15 |           |                 |           |                  |                |                  | K    | 261.1557  | 131.0815        | 244.1292  | 122.5682         |                |                  | 1  |

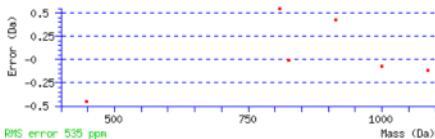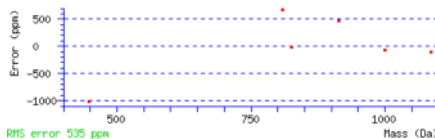

NCBI BLAST search of [RALSNNITSSSPQPKK](#)

(Parameters: blastp, nr protein database, expect=20000, no filter, PAM30)

Other BLAST [web gateways](#)

All matches to this query

| Score | Mr(calc): | Delta   | Sequence                           |
|-------|-----------|---------|------------------------------------|
| 27.7  | 1842.9046 | -0.6552 | <a href="#">LWTLHHCSDKQVK</a>      |
| 21.6  | 1840.8075 | 1.4419  | <a href="#">KGGFFSSSSSSSSSSSK</a>  |
| 18.0  | 1841.8665 | 0.3829  | <a href="#">VGKPSWIGSSSCHPNMR</a>  |
| 18.0  | 1842.8505 | -0.6011 | <a href="#">VGKPSWIGSSSCHPNMR</a>  |
| 17.2  | 1840.5977 | 1.6518  | <a href="#">MDCACATGGSCSCAGSCK</a> |
| 16.9  | 1842.9799 | -0.7304 | <a href="#">AGLKARVQSSINIDOK</a>   |
| 16.6  | 1842.9183 | -0.6689 | <a href="#">RALSNNITSSSPQPKK</a>   |
| 16.6  | 1842.9183 | -0.6689 | <a href="#">RALSNNITSSSPQPKK</a>   |
| 15.8  | 1841.9556 | 0.2938  | <a href="#">EMALKQALLSAIHSDSK</a>  |
| 15.8  | 1842.8860 | -0.6366 | <a href="#">EHNPLSSSDNQLLSR</a>    |

Mascot: <http://www.matrixscience.com/>

**MASCOT** **SCIENCE** Mascot Search Results

**Protein View**

Match to: **Q05550** Score: **102**  
**RecName: Full=Ubiquitin;**  
 Found in search of D:\Merge\20101018\_YD\BIT01763\_YD\_7.mgf

Nominal mass (M<sub>r</sub>): **8544**; Calculated pI value: **6.56**  
 NCBI BLAST search of **Q05550** against nr  
 Unformatted [sequence string](#) for pasting into other applications

Variable modifications: Carbamidomethyl (C),Deamidated (NQ),GlyGly (K),Oxidation (M)  
 Cleavage by Trypsin: cuts C-term side of KR unless next residue is P  
 Sequence Coverage: **86%**

Matched peptides shown in **Bold Red**

**1 MQIFVKLTG KTIALEVEPS DTIENVKAKI QDKEGIPPDQ QRLIFAGKQL**  
**51 EEGRTLSDYN IQKESTLHLV LRLRGG**

Show predicted peptides also

Sort Peptides By  Residue Number  Increasing Mass  Decreasing Mass

| Start | End | Observed  | Mr (expt) | Mr (calc) | Delta   | Miss | Sequence                                                                     |
|-------|-----|-----------|-----------|-----------|---------|------|------------------------------------------------------------------------------|
| 1     | 29  | 829.9620  | 3315.8189 | 3316.7952 | -0.9763 | 3    | -MQIFVKLTGKTIALEVEPSDTIENVKAK.I GlyGly (K) ( <a href="#">Ions score 47</a> ) |
| 1     | 29  | 830.0390  | 3316.1269 | 3316.7952 | -0.6683 | 3    | -MQIFVKLTGKTIALEVEPSDTIENVKAK.I GlyGly (K) ( <a href="#">Ions score 60</a> ) |
| 28    | 42  | 575.1660  | 1722.4762 | 1721.9060 | 0.5702  | 2    | K.AKIQDKEGIPPDQQR.L ( <a href="#">Ions score 43</a> )                        |
| 30    | 42  | 508.3650  | 1522.0732 | 1522.7740 | -0.7008 | 1    | K.IQDKEGIPPDQQR.L ( <a href="#">Ions score 19</a> )                          |
| 30    | 42  | 762.4600  | 1522.9054 | 1522.7740 | 0.1315  | 1    | K.IQDKEGIPPDQQR.L ( <a href="#">Ions score 49</a> )                          |
| 30    | 42  | 762.4720  | 1522.9294 | 1522.7740 | 0.1555  | 1    | K.IQDKEGIPPDQQR.L ( <a href="#">Ions score 58</a> )                          |
| 30    | 42  | 508.7230  | 1523.1472 | 1522.7740 | 0.3732  | 1    | K.IQDKEGIPPDQQR.L ( <a href="#">Ions score 41</a> )                          |
| 43    | 48  | 324.6710  | 647.3274  | 647.4006  | -0.0732 | 0    | R.LIFAGK.Q ( <a href="#">Ions score 32</a> )                                 |
| 43    | 48  | 325.1060  | 648.1974  | 647.4006  | 0.7968  | 0    | R.LIFAGK.Q ( <a href="#">Ions score 34</a> )                                 |
| 55    | 72  | 1065.7020 | 2129.3894 | 2130.1321 | -0.7426 | 1    | R.TLSDYNIQKESTLHLVLR.L Deamidated (NQ) ( <a href="#">Ions score 30</a> )     |
| 55    | 72  | 711.1240  | 2130.3502 | 2130.1321 | 0.2181  | 1    | R.TLSDYNIQKESTLHLVLR.L Deamidated (NQ) ( <a href="#">Ions score 67</a> )     |
| 64    | 72  | 534.4570  | 1066.8994 | 1066.6135 | 0.2860  | 0    | K.ESTLHLVLR.L ( <a href="#">Ions score 49</a> )                              |
| 64    | 72  | 534.4650  | 1066.9154 | 1066.6135 | 0.3020  | 0    | K.ESTLHLVLR.L ( <a href="#">Ions score 46</a> )                              |

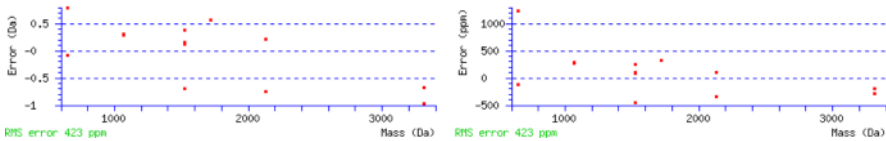

Mascot: <http://www.matrixscience.com/>

**(MATRIX) Mascot Search Results**

**Peptide View**

MS/MS Fragmentation of **MQIFVKTLTGKTLALEVPSDTIENVKAK**  
 Found in **Q05550**, RecName: Full=Ubiquitin;

Match to Query 1281: 3316.126896 from(830.039000,4+) intensity(74723.0000)  
 Title: Cmpd 194, +MSn(830.48), 30.8 min  
 Data file D:\Merge\20101018\_YD\BIT01763\_YD\_7.mgf

Click mouse within plot area to zoom in by factor of two about that point

Or, Plot from 200 to 1600 Da Full range

Label all possible matches  Label matches used for scoring

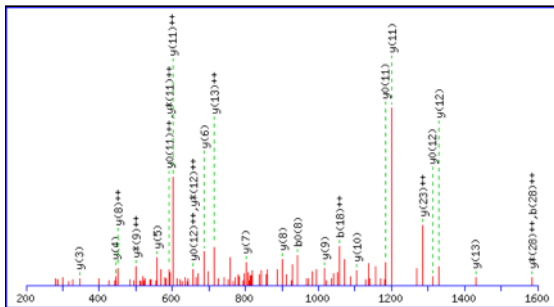

Monoisotopic mass of neutral peptide Mr(calc): 3316.7952  
 Variable modifications:  
 K11 : GlyGly (K)  
 Ions Score: 60 Expect: 0.035  
 Matches : 26/312 fragment ions using 35 most intense peaks (help)

| #  | b         | b <sup>++</sup> | b <sup>*</sup> | b <sup>+++</sup> | b <sup>0</sup> | b <sup>0++</sup> | Seq. | y         | y <sup>++</sup> | y <sup>*</sup> | y <sup>+++</sup> | y <sup>0</sup> | y <sup>0++</sup> | #  |
|----|-----------|-----------------|----------------|------------------|----------------|------------------|------|-----------|-----------------|----------------|------------------|----------------|------------------|----|
| 1  | 132.0478  | 66.5275         |                |                  |                |                  | M    |           |                 |                |                  |                |                  | 29 |
| 2  | 260.1063  | 130.5568        | 243.0798       | 122.0435         |                |                  | Q    | 3186.7620 | 1593.8846       | 3169.7355      | 1585.3714        | 3168.7515      | 1584.8794        | 28 |
| 3  | 373.1904  | 187.0988        | 356.1639       | 178.5856         |                |                  | I    | 3058.7034 | 1529.8554       | 3041.6769      | 1521.3421        | 3040.6929      | 1520.8501        | 27 |
| 4  | 520.2588  | 260.6330        | 503.2323       | 252.1198         |                |                  | F    | 2945.6194 | 1473.3133       | 2928.5928      | 1464.8001        | 2927.6088      | 1464.3080        | 26 |
| 5  | 619.3272  | 310.1673        | 602.3007       | 301.6540         |                |                  | V    | 2798.5510 | 1399.7791       | 2781.5244      | 1391.2658        | 2780.5404      | 1390.7738        | 25 |
| 6  | 747.4222  | 374.2147        | 730.3956       | 365.7015         |                |                  | K    | 2699.4826 | 1350.2449       | 2682.4560      | 1341.7316        | 2681.4720      | 1341.2396        | 24 |
| 7  | 848.4699  | 424.7386        | 831.4433       | 416.2253         | 830.4593       | 415.7333         | T    | 2571.3876 | 1286.1974       | 2554.3610      | 1277.6842        | 2553.3770      | 1277.1922        | 23 |
| 8  | 961.5539  | 481.2806        | 944.5274       | 472.7673         | 943.5434       | 472.2753         | L    | 2470.3399 | 1235.6736       | 2453.3134      | 1227.1603        | 2452.3293      | 1226.6683        | 22 |
| 9  | 1062.6016 | 531.8044        | 1045.5751      | 523.2912         | 1044.5911      | 522.7992         | T    | 2357.2558 | 1179.1316       | 2340.2293      | 1170.6183        | 2339.2453      | 1170.1263        | 21 |
| 10 | 1119.6231 | 560.3152        | 1102.5965      | 551.8019         | 1101.6125      | 551.3099         | G    | 2256.2082 | 1128.6077       | 2239.1816      | 1120.0944        | 2238.1976      | 1119.6024        | 20 |
| 11 | 1361.7610 | 681.3841        | 1344.7344      | 672.8708         | 1343.7504      | 672.3788         | K    | 2199.1867 | 1100.0970       | 2182.1602      | 1091.5837        | 2181.1761      | 1091.0917        | 19 |
| 12 | 1462.8086 | 731.9080        | 1445.7821      | 723.3947         | 1444.7981      | 722.9027         | T    | 1957.0488 | 979.0280        | 1940.0223      | 970.5148         | 1939.0382      | 970.0228         | 18 |
| 13 | 1575.8927 | 788.4500        | 1558.8662      | 779.9367         | 1557.8821      | 779.4447         | I    | 1856.0011 | 928.5042        | 1838.9746      | 919.9909         | 1837.9906      | 919.4989         | 17 |
| 14 | 1646.9298 | 823.9686        | 1629.9033      | 815.4553         | 1628.9193      | 814.9633         | A    | 1742.9171 | 871.9622        | 1725.8905      | 863.4489         | 1724.9065      | 862.9569         | 16 |
| 15 | 1760.0139 | 880.5106        | 1742.9873      | 871.9973         | 1742.0033      | 871.5053         | L    | 1671.8800 | 836.4436        | 1654.8534      | 827.9303         | 1653.8694      | 827.4383         | 15 |
| 16 | 1889.0565 | 945.0319        | 1872.0299      | 936.5186         | 1871.0459      | 936.0266         | E    | 1558.7959 | 779.9016        | 1541.7693      | 771.3883         | 1540.7853      | 770.8963         | 14 |
| 17 | 1988.1249 | 994.5661        | 1971.0983      | 986.0528         | 1970.1143      | 985.5608         | V    | 1429.7533 | 715.3803        | 1412.7268      | 706.8670         | 1411.7427      | 706.3750         | 13 |
| 18 | 2117.1675 | 1059.0874       | 2100.1409      | 1050.5741        | 2099.1569      | 1050.0821        | E    | 1330.6849 | 665.8461        | 1313.6583      | 657.3328         | 1312.6743      | 656.8408         | 12 |
| 19 | 2214.2203 | 1107.6138       | 2197.1937      | 1099.1005        | 2196.2097      | 1098.6085        | P    | 1201.6423 | 601.3248        | 1184.6157      | 592.8115         | 1183.6317      | 592.3195         | 11 |
| 20 | 2301.2523 | 1151.1298       | 2284.2257      | 1142.6165        | 2283.2417      | 1142.1245        | S    | 1104.5895 | 552.7984        | 1087.5630      | 544.2851         | 1086.5790      | 543.7931         | 10 |
| 21 | 2416.2792 | 1208.6433       | 2399.2527      | 1200.1300        | 2398.2687      | 1199.6380        | D    | 1017.5575 | 509.2824        | 1000.5310      | 500.7691         | 999.5469       | 500.2771         | 9  |
| 22 | 2517.3269 | 1259.1671       | 2500.3004      | 1250.6538        | 2499.3163      | 1250.1618        | T    | 902.5306  | 451.7689        | 885.5040       | 443.2556         | 884.5200       | 442.7636         | 8  |
| 23 | 2630.4110 | 1315.7091       | 2613.3844      | 1307.1958        | 2612.4004      | 1306.7038        | I    | 801.4829  | 401.2451        | 784.4563       | 392.7318         | 783.4723       | 392.2398         | 7  |
| 24 | 2759.4536 | 1380.2304       | 2742.4270      | 1371.7171        | 2741.4430      | 1371.2251        | E    | 688.3988  | 344.7030        | 671.3723       | 336.1898         | 670.3883       | 335.6978         | 6  |
| 25 | 2873.4965 | 1437.2519       | 2856.4699      | 1428.7386        | 2855.4859      | 1428.2466        | N    | 559.3562  | 280.1817        | 542.3297       | 271.6685         |                |                  | 5  |
| 26 | 2972.5649 | 1486.7861       | 2955.5384      | 1478.2728        | 2954.5543      | 1477.7808        | V    | 445.3133  | 223.1603        | 428.2867       | 214.6470         |                |                  | 4  |
| 27 | 3100.6599 | 1550.8336       | 3083.6333      | 1542.3203        | 3082.6493      | 1541.8283        | K    | 346.2449  | 173.6261        | 329.2183       | 165.1128         |                |                  | 3  |
| 28 | 3171.6970 | 1586.3521       | 3154.6704      | 1577.8389        | 3153.6864      | 1577.3468        | A    | 218.1499  | 109.5786        | 201.1234       | 101.0653         |                |                  | 2  |
| 29 |           |                 |                |                  |                |                  | K    | 147.1128  | 74.0600         | 130.0863       | 65.5468          |                |                  | 1  |

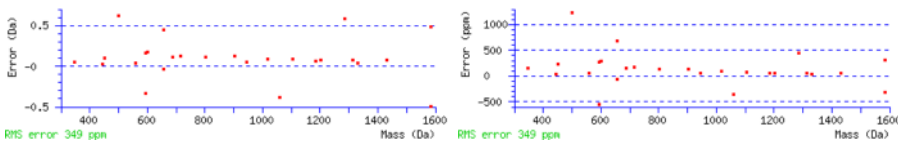

NCBI BLAST search of **MQIFVKTLTGKTLALEVPSDTIENVKAK**  
 (Parameters: blastp, nr protein database, expect=20000, no filter, PAM30)  
 Other BLAST [web gateways](#)

**All matches to this query**

| Score | Mr(calc): | Delta   | Sequence                                     |
|-------|-----------|---------|----------------------------------------------|
| 59.6  | 3316.7952 | -0.6683 | <a href="#">MQIFVKTLTGKTLALEVPSDTIENVKAK</a> |
| 57.2  | 3316.7952 | -0.6683 | <a href="#">MQIFVKTLTGKTLALEVPSDTIENVKAK</a> |
| 57.2  | 3315.7926 | 0.3343  | <a href="#">QIFVKTLTGKTTILDVEPSDTIENVKAK</a> |
| 57.2  | 3316.7766 | -0.6497 | <a href="#">QIFVKTLTGKTTILDVEPSDTIENVKAK</a> |
| 35.8  | 3314.8312 | 1.2957  | <a href="#">NILDLSPFTVDTLPMEIVDIFRKLGLR</a>  |
| 34.9  | 3315.5385 | 0.5884  | <a href="#">MEQLKEGGEGQSEAAEAORQQAEOAKK</a>  |

|      |           |         |                                                |
|------|-----------|---------|------------------------------------------------|
| 34.9 | 3315.5385 | 0.5884  | <a href="#">MEQLKEQGEGQSEAAEAQRQQAQAQKK</a>    |
| 34.8 | 3316.5225 | -0.3956 | <a href="#">MEQLKEQGEGQSEAAEAQRQQAQAQKK</a>    |
| 33.9 | 3316.4474 | -0.3205 | <a href="#">CRKENSALKECLTAYYNDPAFYEECK</a>     |
| 33.4 | 3315.8329 | 0.2940  | <a href="#">IYOKIVTKARNLVAVGEAIESEFGIPIINK</a> |

Mascot: <http://www.matrixscience.com/>

**MASCOT** **SCIENCE** Mascot Search Results

Peptide View

MS/MS Fragmentation of **MQIFVKTLTGKTIALVEVPSDTIENVKAK**  
 Found in **Q05550**, RecName: Full=Ubiquitin;

Match to Query 1281: 3316.126896 from (830.039000,4+) intensity(74723.0000)  
 Title: Cmpd 194, +MSn(830.48), 30.8 min  
 Data file D:\Merge\20101018\_YD\BIT01763\_YD\_7.mgf

Click mouse within plot area to zoom in by factor of two about that point

Or, Plot from 200 to 1600 Da Full range  
 Label all possible matches  Label matches used for scoring

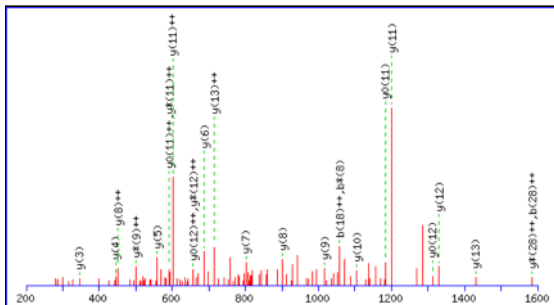

Monoisotopic mass of neutral peptide Mr(calc): 3316.7952  
 Variable modifications:  
 K6 : GlyGly (K)  
 Ions Score: 57 Expect: 0.062  
 Matches : 25/312 fragment ions using 35 most intense peaks (help)

| #  | b         | b <sup>++</sup> | b <sup>*</sup> | b <sup>+++</sup> | b <sup>0</sup> | b <sup>0++</sup> | Seq. | y         | y <sup>++</sup> | y <sup>*</sup> | y <sup>+++</sup> | y <sup>0</sup> | y <sup>0++</sup> | #  |
|----|-----------|-----------------|----------------|------------------|----------------|------------------|------|-----------|-----------------|----------------|------------------|----------------|------------------|----|
| 1  | 132.0478  | 66.5275         |                |                  |                |                  | M    |           |                 |                |                  |                |                  | 29 |
| 2  | 260.1063  | 130.5568        | 243.0798       | 122.0435         |                |                  | Q    | 3186.7620 | 1593.8846       | 3169.7355      | 1585.3714        | 3168.7515      | 1584.8794        | 28 |
| 3  | 373.1904  | 187.0988        | 356.1639       | 178.5856         |                |                  | I    | 3058.7034 | 1529.8554       | 3041.6769      | 1521.3421        | 3040.6929      | 1520.8501        | 27 |
| 4  | 520.2588  | 260.6330        | 503.2323       | 252.1198         |                |                  | F    | 2945.6194 | 1473.3133       | 2928.5928      | 1464.8001        | 2927.6088      | 1464.3080        | 26 |
| 5  | 619.3272  | 310.1673        | 602.3007       | 301.6540         |                |                  | V    | 2798.5510 | 1399.7791       | 2781.5244      | 1391.2658        | 2780.5404      | 1390.7738        | 25 |
| 6  | 861.4651  | 431.2362        | 844.4386       | 422.7229         |                |                  | K    | 2699.4826 | 1350.2449       | 2682.4560      | 1341.7316        | 2681.4720      | 1341.2396        | 24 |
| 7  | 962.5128  | 481.7600        | 945.4863       | 473.2468         | 944.5022       | 472.7548         | T    | 2457.3447 | 1229.1760       | 2440.3181      | 1220.6627        | 2439.3341      | 1220.1707        | 23 |
| 8  | 1075.5969 | 538.3021        | 1058.5703      | 529.7888         | 1057.5863      | 529.2968         | L    | 2356.2970 | 1178.6521       | 2339.2704      | 1170.1389        | 2338.2864      | 1169.6468        | 22 |
| 9  | 1176.6445 | 588.8259        | 1159.6180      | 580.3126         | 1158.6340      | 579.8206         | T    | 2243.2129 | 1122.1101       | 2226.1864      | 1113.5968        | 2225.2024      | 1113.1048        | 21 |
| 10 | 1233.6660 | 617.3366        | 1216.6395      | 608.8234         | 1215.6554      | 608.3314         | G    | 2142.1652 | 1071.5863       | 2125.1387      | 1063.0730        | 2124.1547      | 1062.5810        | 20 |
| 11 | 1361.7610 | 681.3841        | 1344.7344      | 672.8708         | 1343.7504      | 672.3788         | K    | 2085.1438 | 1043.0755       | 2068.1172      | 1034.5623        | 2067.1332      | 1034.0702        | 19 |
| 12 | 1462.8086 | 731.9080        | 1445.7821      | 723.3947         | 1444.7981      | 722.9027         | T    | 1957.0488 | 979.0280        | 1940.0223      | 970.5148         | 1939.0382      | 970.0228         | 18 |
| 13 | 1575.8927 | 788.4500        | 1558.8662      | 779.9367         | 1557.8821      | 779.4447         | I    | 1856.0011 | 928.5042        | 1838.9746      | 919.9909         | 1837.9906      | 919.4989         | 17 |
| 14 | 1646.9298 | 823.9686        | 1629.9033      | 815.4553         | 1628.9193      | 814.9633         | A    | 1742.9171 | 871.9622        | 1725.8905      | 863.4489         | 1724.9065      | 862.9569         | 16 |
| 15 | 1760.0139 | 880.5106        | 1742.9873      | 871.9973         | 1742.0033      | 871.5053         | L    | 1671.8800 | 836.4436        | 1654.8534      | 827.9303         | 1653.8694      | 827.4383         | 15 |
| 16 | 1889.0565 | 945.0319        | 1872.0299      | 936.5186         | 1871.0459      | 936.0266         | E    | 1558.7959 | 779.9016        | 1541.7693      | 771.3883         | 1540.7853      | 770.8963         | 14 |
| 17 | 1988.1249 | 994.5661        | 1971.0983      | 986.0528         | 1970.1143      | 985.5608         | V    | 1429.7533 | 715.3803        | 1412.7268      | 706.8670         | 1411.7427      | 706.3750         | 13 |
| 18 | 2117.1675 | 1059.0874       | 2100.1409      | 1050.5741        | 2099.1569      | 1050.0821        | E    | 1330.6849 | 665.8461        | 1313.6583      | 657.3328         | 1312.6743      | 656.8408         | 12 |
| 19 | 2214.2203 | 1107.6138       | 2197.1937      | 1099.1005        | 2196.2097      | 1098.6085        | P    | 1201.6423 | 601.3248        | 1184.6157      | 592.8115         | 1183.6317      | 592.3195         | 11 |
| 20 | 2301.2523 | 1151.1298       | 2284.2257      | 1142.6165        | 2283.2417      | 1142.1245        | S    | 1104.5895 | 552.7984        | 1087.5630      | 544.2851         | 1086.5790      | 543.7931         | 10 |
| 21 | 2416.2792 | 1208.6433       | 2399.2527      | 1200.1300        | 2398.2687      | 1199.6380        | D    | 1017.5575 | 509.2824        | 1000.5310      | 500.7691         | 999.5469       | 500.2771         | 9  |
| 22 | 2517.3269 | 1259.1671       | 2500.3004      | 1250.6538        | 2499.3163      | 1250.1618        | T    | 902.5306  | 451.7689        | 885.5040       | 443.2556         | 884.5200       | 442.7636         | 8  |
| 23 | 2630.4110 | 1315.7091       | 2613.3844      | 1307.1958        | 2612.4004      | 1306.7038        | I    | 801.4829  | 401.2451        | 784.4563       | 392.7318         | 783.4723       | 392.2398         | 7  |
| 24 | 2759.4536 | 1380.2304       | 2742.4270      | 1371.7171        | 2741.4430      | 1371.2251        | E    | 688.3988  | 344.7030        | 671.3723       | 336.1898         | 670.3883       | 335.6978         | 6  |
| 25 | 2873.4965 | 1437.2519       | 2856.4699      | 1428.7386        | 2855.4859      | 1428.2466        | N    | 559.3562  | 280.1817        | 542.3297       | 271.6685         |                |                  | 5  |
| 26 | 2972.5649 | 1486.7861       | 2955.5384      | 1478.2728        | 2954.5543      | 1477.7808        | V    | 445.3133  | 223.1603        | 428.2867       | 214.6470         |                |                  | 4  |
| 27 | 3100.6599 | 1550.8336       | 3083.6333      | 1542.3203        | 3082.6493      | 1541.8283        | K    | 346.2449  | 173.6261        | 329.2183       | 165.1128         |                |                  | 3  |
| 28 | 3171.6970 | 1586.3521       | 3154.6704      | 1577.8389        | 3153.6864      | 1577.3468        | A    | 218.1499  | 109.5786        | 201.1234       | 101.0653         |                |                  | 2  |
| 29 |           |                 |                |                  |                |                  | K    | 147.1128  | 74.0600         | 130.0863       | 65.5468          |                |                  | 1  |

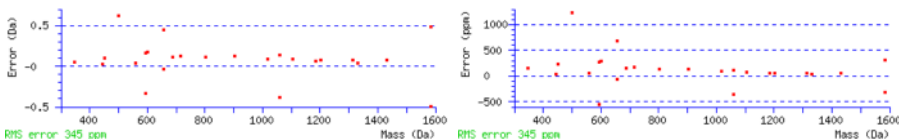

NCBI BLAST search of **MQIFVKTLTGKTIALVEVPSDTIENVKAK**  
 (Parameters: blastp, nr protein database, expect=20000, no filter, PAM30)  
 Other BLAST [web gateways](#)

All matches to this query

| Score | Mr(calc): | Delta   | Sequence                             |
|-------|-----------|---------|--------------------------------------|
| 59.6  | 3316.7952 | -0.6683 | <b>MQIFVKTLTGKTIALVEVPSDTIENVKAK</b> |
| 57.2  | 3316.7952 | -0.6683 | <b>MQIFVKTLTGKTIALVEVPSDTIENVKAK</b> |
| 57.2  | 3315.7926 | 0.3343  | <b>QIFVKTLTGKTIILDVEVPSDTIENVKAK</b> |
| 57.2  | 3316.7766 | -0.6497 | <b>QIFVKTLTGKTIILDVEVPSDTIENVKAK</b> |
| 35.8  | 3314.8312 | 1.2957  | <b>NILDLSPFTVDTLPMEIVDIFRKLGLR</b>   |
| 34.9  | 3315.5385 | 0.5884  | <b>MEQLKEGGEGQSEAAEAORQAEAQK</b>     |

|      |           |         |                                                |
|------|-----------|---------|------------------------------------------------|
| 34.9 | 3315.5385 | 0.5884  | <a href="#">MEQLKEQGEGQSEAAEAQRQQAQAQKK</a>    |
| 34.8 | 3316.5225 | -0.3956 | <a href="#">MEQLKEQGEGQSEAAEAQRQQAQAQKK</a>    |
| 33.9 | 3316.4474 | -0.3205 | <a href="#">CRKENSALKECLTAYYNDPAFYEECK</a>     |
| 33.4 | 3315.8329 | 0.2940  | <a href="#">IYOKIVTKARNLVAVGEAIESEFGIPIINK</a> |

Mascot: <http://www.matrixscience.com/>





|           |          |           |           |         |   |                     |                            |
|-----------|----------|-----------|-----------|---------|---|---------------------|----------------------------|
| 661 - 673 | 763.2260 | 1524.4374 | 1522.7740 | 1.6635  | 1 | K.IQDKEGIPPDQQR.L   | (Ions score 24)            |
| 661 - 673 | 763.2840 | 1524.5534 | 1522.7740 | 1.7795  | 1 | K.IQDKEGIPPDQQR.L   | (Ions score 44)            |
| 674 - 679 | 324.6790 | 647.3434  | 647.4006  | -0.0572 | 0 | R.LIFAGK.Q          | (Ions score 35)            |
| 674 - 685 | 487.5700 | 1459.6882 | 1459.7783 | -0.0901 | 1 | R.LIFAGKQLEDGR.T    | GlyGly (K) (Ions score 37) |
| 674 - 685 | 730.9460 | 1459.8774 | 1459.7783 | 0.0991  | 1 | R.LIFAGKQLEDGR.T    | GlyGly (K) (Ions score 87) |
| 680 - 694 | 594.0940 | 1779.2602 | 1778.8799 | 0.3803  | 1 | K.QLEDGRTLSDYNIQK.E | (Ions score 21)            |
| 686 - 694 | 541.0340 | 1080.0534 | 1080.5451 | -0.4917 | 0 | R.TLSDYNIQK.E       | (Ions score 20)            |
| 686 - 694 | 541.3310 | 1080.6474 | 1080.5451 | 0.1023  | 0 | R.TLSDYNIQK.E       | (Ions score 57)            |
| 695 - 703 | 534.2230 | 1066.4314 | 1066.6135 | -0.1820 | 0 | K.ESTLHLVLR.L       | (Ions score 58)            |
| 695 - 703 | 534.3060 | 1066.5974 | 1066.6135 | -0.0160 | 0 | K.ESTLHLVLR.L       | (Ions score 26)            |
| 695 - 703 | 534.3640 | 1066.7134 | 1066.6135 | 0.1000  | 0 | K.ESTLHLVLR.L       | (Ions score 74)            |
| 695 - 703 | 534.3700 | 1066.7254 | 1066.6135 | 0.1120  | 0 | K.ESTLHLVLR.L       | (Ions score 65)            |
| 695 - 703 | 534.3790 | 1066.7434 | 1066.6135 | 0.1300  | 0 | K.ESTLHLVLR.L       | (Ions score 43)            |
| 695 - 703 | 534.3870 | 1066.7594 | 1066.6135 | 0.1460  | 0 | K.ESTLHLVLR.L       | (Ions score 62)            |
| 695 - 703 | 534.3950 | 1066.7754 | 1066.6135 | 0.1620  | 0 | K.ESTLHLVLR.L       | (Ions score 55)            |
| 695 - 703 | 534.4140 | 1066.8134 | 1066.6135 | 0.2000  | 0 | K.ESTLHLVLR.L       | (Ions score 21)            |
| 695 - 703 | 534.4270 | 1066.8394 | 1066.6135 | 0.2260  | 0 | K.ESTLHLVLR.L       | (Ions score 45)            |
| 695 - 703 | 534.4600 | 1066.9054 | 1066.6135 | 0.2920  | 0 | K.ESTLHLVLR.L       | (Ions score 20)            |
| 695 - 703 | 534.4870 | 1066.9594 | 1066.6135 | 0.3460  | 0 | K.ESTLHLVLR.L       | (Ions score 65)            |
| 695 - 703 | 534.5010 | 1066.9874 | 1066.6135 | 0.3740  | 0 | K.ESTLHLVLR.L       | (Ions score 69)            |

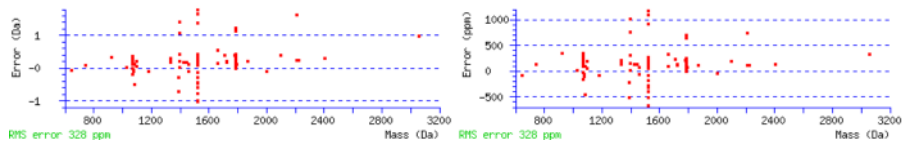

Mascot: <http://www.matrixscience.com/>

**(MATRIX) (SCIENCE) Mascot Search Results**

**Peptide View**

MS/MS Fragmentation of **TLTGKTTILEVEPSDTIENVK**  
 Found in **YD\_RFP-p53-Ub**, YD\_RFP-p53-Ub

Match to Query 717: 2401.568172 from(801.530000,3+) intensity(782903.0000)  
 Title: Cmpd 346, +MSn(802.12), 29.0 min  
 Data file D:\Data\2010\_10\BIT01711b\_YD\_14\_RC1\_01\_7727.d\Analysis.mgf

Click mouse within plot area to zoom in by factor of two about that point

Or, Plot from 300 to 1500 Da Full range

Label all possible matches  Label matches used for scoring

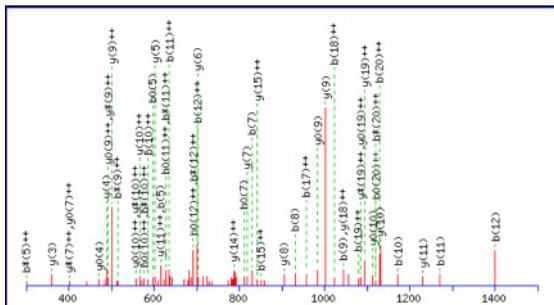

Monoisotopic mass of neutral peptide Mr(calc): 2401.2588

Variable modifications:

K5 : GlyGly (K)

Ions Score: 79 Expect: 0.00035

Matches : 54/226 fragment ions using 55 most intense peaks (help)

| #  | b                | b <sup>++</sup>  | b <sup>*</sup> | b <sup>#+</sup>  | b <sup>0</sup>  | b <sup>0++</sup> | Seq. | y                | y <sup>++</sup> | y <sup>*</sup> | y <sup>#+</sup> | y <sup>0</sup>   | y <sup>0++</sup> | #  |
|----|------------------|------------------|----------------|------------------|-----------------|------------------|------|------------------|-----------------|----------------|-----------------|------------------|------------------|----|
| 1  | 102.0550         | 51.5311          |                |                  | 84.0444         | 42.5258          | T    |                  |                 |                |                 |                  |                  | 21 |
| 2  | 215.1390         | 108.0731         |                |                  | 197.1285        | 99.0679          | L    | 2301.2184        | 1151.1128       | 2284.1918      | 1142.5996       | 2283.2078        | 1142.1076        | 20 |
| 3  | 316.1867         | 158.5970         |                |                  | 298.1761        | 149.5917         | T    | 2188.1343        | 1094.5708       | 2171.1078      | 1086.0575       | 2170.1238        | 1085.5655        | 19 |
| 4  | 373.2082         | 187.1077         |                |                  | 355.1976        | 178.1024         | G    | 2087.0867        | 1044.0470       | 2070.0601      | 1035.5337       | 2069.0761        | 1035.0417        | 18 |
| 5  | <b>615.3461</b>  | 308.1767         | 598.3195       | <b>299.6634</b>  | <b>597.3355</b> | 299.1714         | K    | 2030.0652        | 1015.5362       | 2013.0386      | 1007.0230       | 2012.0546        | 1006.5310        | 17 |
| 6  | 716.3937         | 358.7005         | 699.3672       | 350.1872         | 698.3832        | 349.6952         | T    | 1787.9273        | 894.4673        | 1770.9008      | 885.9540        | 1769.9167        | 885.4620         | 16 |
| 7  | <b>829.4778</b>  | 415.2425         | 812.4512       | 406.7293         | <b>811.4672</b> | 406.2373         | I    | 1686.8796        | <b>843.9434</b> | 1669.8531      | 835.4302        | 1668.8691        | 834.9382         | 15 |
| 8  | <b>930.5255</b>  | 465.7664         | 913.4989       | 457.2531         | 912.5149        | 456.7611         | T    | 1573.7956        | <b>787.4014</b> | 1556.7690      | 778.8881        | 1555.7850        | 778.3961         | 14 |
| 9  | <b>1043.6095</b> | 522.3084         | 1026.5830      | <b>513.7951</b>  | 1025.5990       | 513.3031         | L    | 1472.7479        | 736.8776        | 1455.7213      | 728.3643        | 1454.7373        | 727.8723         | 13 |
| 10 | <b>1172.6521</b> | <b>586.8297</b>  | 1155.6256      | <b>578.3164</b>  | 1154.6416       | <b>577.8244</b>  | E    | 1359.6638        | 680.3355        | 1342.6373      | 671.8223        | 1341.6533        | 671.3303         | 12 |
| 11 | <b>1271.7205</b> | <b>636.3639</b>  | 1254.6940      | <b>627.8506</b>  | 1253.7100       | <b>627.3586</b>  | V    | <b>1230.6212</b> | 615.8142        | 1213.5947      | 607.3010        | 1212.6107        | 606.8090         | 11 |
| 12 | <b>1400.7631</b> | <b>700.8852</b>  | 1383.7366      | <b>692.3719</b>  | 1382.7526       | <b>691.8799</b>  | E    | <b>1131.5528</b> | 566.2800        | 1114.5263      | <b>557.7668</b> | <b>1113.5422</b> | <b>557.2748</b>  | 10 |
| 13 | 1497.8159        | 749.4116         | 1480.7894      | 740.8983         | 1479.8053       | 740.4063         | P    | <b>1002.5102</b> | 501.7587        | 985.4837       | <b>493.2455</b> | <b>984.4997</b>  | <b>492.7535</b>  | 9  |
| 14 | 1584.8479        | 792.9276         | 1567.8214      | 784.4143         | 1566.8374       | 783.9223         | S    | <b>905.4575</b>  | 453.2324        | 888.4309       | 444.7191        | 887.4469         | 444.2271         | 8  |
| 15 | 1699.8749        | <b>850.4411</b>  | 1682.8483      | 841.9278         | 1681.8643       | 841.4358         | D    | <b>818.4254</b>  | 409.7163        | 801.3989       | <b>401.2031</b> | 800.4149         | <b>400.7111</b>  | 7  |
| 16 | 1800.9226        | 900.9649         | 1783.8960      | 892.4516         | 1782.9120       | 891.9596         | T    | <b>703.3985</b>  | 352.2029        | 686.3719       | 343.6896        | 685.3879         | 343.1976         | 6  |
| 17 | 1914.0066        | <b>957.5069</b>  | 1896.9801      | 948.9937         | 1895.9961       | 948.5017         | I    | <b>602.3508</b>  | 301.6790        | 585.3243       | 293.1658        | 584.3402         | 292.6738         | 5  |
| 18 | 2043.0492        | <b>1022.0282</b> | 2026.0227      | 1013.5150        | 2025.0386       | 1013.0230        | E    | <b>489.2667</b>  | 245.1370        | 472.2402       | 236.6237        | <b>471.2562</b>  | 236.1317         | 4  |
| 19 | 2157.0921        | <b>1079.0497</b> | 2140.0656      | 1070.5364        | 2139.0816       | 1070.0444        | N    | <b>360.2241</b>  | 180.6157        | 343.1976       | 172.1024        |                  |                  | 3  |
| 20 | 2256.1605        | <b>1128.5839</b> | 2239.1340      | <b>1120.0706</b> | 2238.1500       | <b>1119.5786</b> | V    | 246.1812         | 123.5942        | 229.1547       | 115.0810        |                  |                  | 2  |
| 21 |                  |                  |                |                  |                 |                  | K    | 147.1128         | 74.0600         | 130.0863       | 65.5468         |                  |                  | 1  |

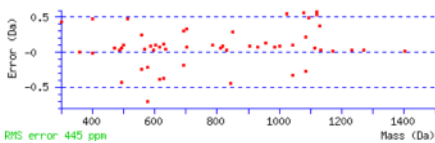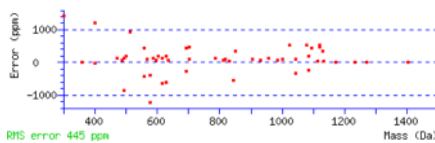

NCBI BLAST search of **TLTGKTTILEVEPSDTIENVK**  
 (Parameters: blastp, nr protein database, expect=20000, no filter, PAM30)  
 Other BLAST [web gateways](#)

**All matches to this query**

| Score | Mr(calc): | Delta   | Sequence                                 |
|-------|-----------|---------|------------------------------------------|
| 78.7  | 2401.2588 | 0.3094  | <a href="#">TLTGKTTILEVEPSDTIENVK</a>    |
| 47.6  | 2402.0180 | -0.4498 | <a href="#">TSGNQQSVVTPSTGTINDFCSK</a>   |
| 41.2  | 2402.2428 | -0.6746 | <a href="#">TLTGKTTILEVEPSDTIENVK</a>    |
| 34.8  | 2402.1648 | -0.5966 | <a href="#">EIREACDNAEVIGARYPPGAGSK</a>  |
| 34.4  | 2401.2887 | 0.2795  | <a href="#">LVSVASTGTPAMVDANNGLVTKLK</a> |
| 33.0  | 2401.1682 | 0.4000  | <a href="#">ITQSIMDNPEAIEQIAREVK</a>     |
| 32.9  | 2401.0340 | 0.5342  | <a href="#">TSGNQQSVVTPSTGTINDFCSK</a>   |
| 31.6  | 2401.0340 | 0.5342  | <a href="#">TSGNQQSVVTPSTGTINDFCSK</a>   |
| 31.6  | 2401.0340 | 0.5342  | <a href="#">TSGNQQSVVTPSTGTINDFCSK</a>   |
| 30.4  | 2401.3216 | 0.2465  | <a href="#">KVNIASYQVKPGDVIEVKEASK</a>   |

**(MATRIX) (SCIENCE) Mascot Search Results**

**Peptide View**

MS/MS Fragmentation of **LKDGGHYDAEVK**  
 Found in **YD\_RFP-p53-Ub**, YD\_RFP-p53-Ub

Match to Query 282: 1444.875448 from(723.445000,2+) intensity(29358.0000)  
 Title: Cmpd 220, +MSn(723.91), 17.2 min  
 Data file D:\Data\2010\_10\BIT01711b\_YD\_14\_RC1\_01\_7727.d\Analysis.mgf

Click mouse within plot area to zoom in by factor of two about that point

Or, Plot from 200 to 1700 Da Full range

Label all possible matches  Label matches used for scoring

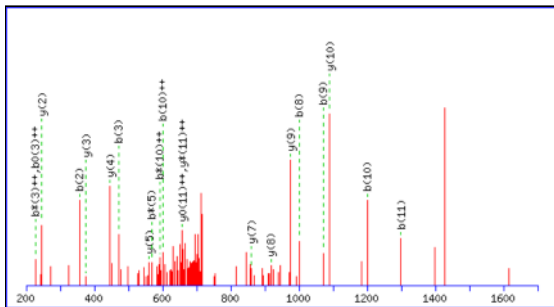

Monoisotopic mass of neutral peptide Mr(calc): 1444.6946

Variable modifications:

K2 : GlyGly (K)

Ions Score: 44 Expect: 0.55

Matches : 21/122 Fragment ions using 36 most intense peaks (help)

| #  | b                | b <sup>++</sup> | b <sup>*</sup>  | b <sup>*++</sup> | b <sup>0</sup> | b <sup>0++</sup> | Seq. | y                | y <sup>++</sup> | y <sup>*</sup> | y <sup>*++</sup> | y <sup>0</sup> | y <sup>0++</sup> | #  |
|----|------------------|-----------------|-----------------|------------------|----------------|------------------|------|------------------|-----------------|----------------|------------------|----------------|------------------|----|
| 1  | 114.0913         | 57.5493         |                 |                  |                |                  | L    |                  |                 |                |                  |                |                  | 12 |
| 2  | <b>356.2292</b>  | 178.6183        | 339.2027        | 170.1050         |                |                  | K    | 1332.6179        | 666.8126        | 1315.5913      | <b>658.2993</b>  | 1314.6073      | <b>657.8073</b>  | 11 |
| 3  | <b>471.2562</b>  | 236.1317        | 454.2296        | <b>227.6185</b>  | 453.2456       | <b>227.1264</b>  | D    | <b>1090.4800</b> | 545.7436        | 1073.4534      | 537.2304         | 1072.4694      | 536.7383         | 10 |
| 4  | 528.2776         | 264.6425        | 511.2511        | 256.1292         | 510.2671       | 255.6372         | G    | <b>975.4530</b>  | 488.2302        | 958.4265       | 479.7169         | 957.4425       | 479.2249         | 9  |
| 5  | 585.2991         | 293.1532        | <b>568.2726</b> | 284.6399         | 567.2885       | 284.1479         | G    | <b>918.4316</b>  | 459.7194        | 901.4050       | 451.2062         | 900.4210       | 450.7141         | 8  |
| 6  | 722.3580         | 361.6826        | 705.3315        | 353.1694         | 704.3474       | 352.6774         | H    | <b>861.4101</b>  | 431.2087        | 844.3836       | 422.6954         | 843.3995       | 422.2034         | 7  |
| 7  | 885.4213         | 443.2143        | 868.3948        | 434.7010         | 867.4108       | 434.2090         | Y    | 724.3512         | 362.6792        | 707.3246       | 354.1660         | 706.3406       | 353.6740         | 6  |
| 8  | <b>1000.4483</b> | 500.7278        | 983.4217        | 492.2145         | 982.4377       | 491.7225         | D    | <b>561.2879</b>  | 281.1476        | 544.2613       | 272.6343         | 543.2773       | 272.1423         | 5  |
| 9  | <b>1071.4854</b> | 536.2463        | 1054.4589       | 527.7331         | 1053.4748      | 527.2411         | A    | <b>446.2609</b>  | 223.6341        | 429.2344       | 215.1208         | 428.2504       | 214.6288         | 4  |
| 10 | <b>1200.5280</b> | <b>600.7676</b> | 1183.5014       | <b>592.2544</b>  | 1182.5174      | 591.7624         | E    | <b>375.2238</b>  | 188.1155        | 358.1973       | 179.6023         | 357.2132       | 179.1103         | 3  |
| 11 | <b>1299.5964</b> | 650.3018        | 1282.5699       | 641.7886         | 1281.5858      | 641.2966         | V    | <b>246.1812</b>  | 123.5942        | 229.1547       | 115.0810         |                |                  | 2  |
| 12 |                  |                 |                 |                  |                |                  | K    | 147.1128         | 74.0600         | 130.0863       | 65.5468          |                |                  | 1  |

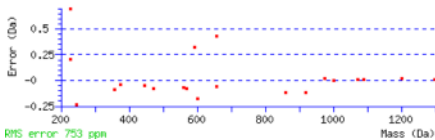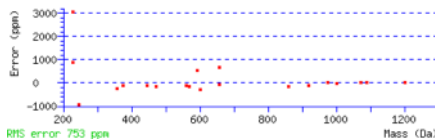

NCBI BLAST search of **LKDGGHYDAEVK**

(Parameters: blastp, nr protein database, expect=20000, no filter, PAM30)

Other BLAST [web gateways](#)

All matches to this query

| Score | Mr(calc): | Delta  | Sequence                      |
|-------|-----------|--------|-------------------------------|
| 44.4  | 1444.6946 | 0.1808 | <a href="#">LKDGGHYDAEVK</a>  |
| 40.3  | 1444.7409 | 0.1346 | <a href="#">KLDQINDKLDK</a>   |
| 36.4  | 1444.7521 | 0.1233 | <a href="#">RAQDEIQKLTDK</a>  |
| 31.2  | 1444.7045 | 0.1709 | <a href="#">KLDEAQAQADIK</a>  |
| 29.2  | 1444.7158 | 0.1597 | <a href="#">KLDKNGDGLDK</a>   |
| 29.1  | 1444.7522 | 0.1233 | <a href="#">IGGKTQDOTAANK</a> |
| 29.0  | 1443.6048 | 1.2706 | <a href="#">MNGAPQNTSHGSK</a> |
| 28.8  | 1444.7409 | 0.1346 | <a href="#">KLNOVGSDIENK</a>  |
| 28.8  | 1444.7521 | 0.1233 | <a href="#">NQLNOKTKLDK</a>   |
| 28.8  | 1444.7521 | 0.1233 | <a href="#">NQLNOKTKLDK</a>   |

Mascot: <http://www.matrixscience.com/>

**Mascot Search Results**

**Peptide View**

MS/MS Fragmentation of **LIFAGKQLEDGR**  
 Found in **YD\_RFP-p53-Ub**, YD\_RFP-p53-Ub

Match to Query 291: 1459.877448 from(730.946000,2+) intensity(1610801.0000)  
 Title: Cmpd 315, +MSn(731.23), 26.0 min  
 Data file D:\Data\2010\_10\BIT01711b\_YD\_14\_RC1\_01\_7727.d\Analysis.mgf

Click mouse within plot area to zoom in by factor of two about that point

Or, Plot from 200 to 1300 Da Full range

Label all possible matches  Label matches used for scoring

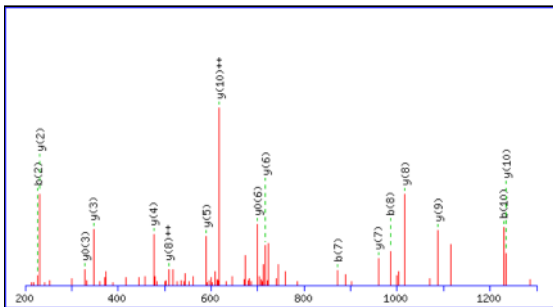

Monoisotopic mass of neutral peptide Mr(calc): 1459.7783

Variable modifications:

K6 : GlyGly (K)

Ions Score: 87 Expect: 3.8e-06

Matches : 17/102 Fragment ions using 20 most intense peaks [\(help\)](#)

| #  | b                | b <sup>++</sup> | b*        | b <sup>++</sup> * | b <sup>0</sup> | b <sup>0++</sup> | Seq. | y                | y <sup>++</sup> | y*        | y <sup>++</sup> * | y <sup>0</sup>  | y <sup>0++</sup> | #  |
|----|------------------|-----------------|-----------|-------------------|----------------|------------------|------|------------------|-----------------|-----------|-------------------|-----------------|------------------|----|
| 1  | 114.0913         | 57.5493         |           |                   |                |                  | L    |                  |                 |           |                   |                 |                  | 12 |
| 2  | <b>227.1754</b>  | 114.0913        |           |                   |                |                  | I    | 1347.7015        | 674.3544        | 1330.6750 | 665.8411          | 1329.6910       | 665.3491         | 11 |
| 3  | 374.2438         | 187.6255        |           |                   |                |                  | F    | <b>1234.6175</b> | <b>617.8124</b> | 1217.5909 | 609.2991          | 1216.6069       | 608.8071         | 10 |
| 4  | 445.2809         | 223.1441        |           |                   |                |                  | A    | <b>1087.5491</b> | 544.2782        | 1070.5225 | 535.7649          | 1069.5385       | 535.2729         | 9  |
| 5  | 502.3024         | 251.6548        |           |                   |                |                  | G    | <b>1016.5119</b> | <b>508.7596</b> | 999.4854  | 500.2463          | 998.5014        | 499.7543         | 8  |
| 6  | 744.4403         | 372.7238        | 727.4137  | 364.2105          |                |                  | K    | <b>959.4905</b>  | 480.2489        | 942.4639  | 471.7356          | 941.4799        | 471.2436         | 7  |
| 7  | <b>872.4989</b>  | 436.7531        | 855.4723  | 428.2398          |                |                  | Q    | <b>717.3526</b>  | 359.1799        | 700.3260  | 350.6667          | <b>699.3420</b> | 350.1747         | 6  |
| 8  | <b>985.5829</b>  | 493.2951        | 968.5564  | 484.7818          |                |                  | L    | <b>589.2940</b>  | 295.1506        | 572.2675  | 286.6374          | 571.2835        | 286.1454         | 5  |
| 9  | 1114.6255        | 557.8164        | 1097.5990 | 549.3031          | 1096.6150      | 548.8111         | E    | <b>476.2100</b>  | 238.6086        | 459.1834  | 230.0953          | 458.1994        | 229.6033         | 4  |
| 10 | <b>1229.6525</b> | 615.3299        | 1212.6259 | 606.8166          | 1211.6419      | 606.3246         | D    | <b>347.1674</b>  | 174.0873        | 330.1408  | 165.5740          | <b>329.1568</b> | 165.0820         | 3  |
| 11 | 1286.6739        | 643.8406        | 1269.6474 | 635.3273          | 1268.6634      | 634.8353         | G    | <b>232.1404</b>  | 116.5738        | 215.1139  | 108.0606          |                 |                  | 2  |
| 12 |                  |                 |           |                   |                |                  | R    | 175.1190         | 88.0631         | 158.0924  | 79.5498           |                 |                  | 1  |

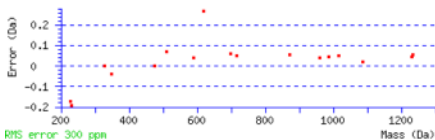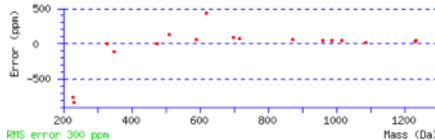

NCBI BLAST search of **LIFAGKQLEDGR**

(Parameters: blastp, nr protein database, expect=20000, no filter, PAM30)

Other BLAST [web gateways](#)

**All matches to this query**

| Score | Mr(calc): | Delta   | Sequence                       |
|-------|-----------|---------|--------------------------------|
| 87.5  | 1459.7783 | 0.0991  | <a href="#">LIFAGKQLEDGR</a>   |
| 28.9  | 1459.7307 | 0.1468  | <a href="#">ALENALPYLEDGR</a>  |
| 27.6  | 1460.7657 | -0.8882 | <a href="#">MSKALLVLEDGR</a>   |
| 27.4  | 1458.8228 | 1.0547  | <a href="#">MAKIGKKLOEAK</a>   |
| 25.6  | 1459.7718 | 0.1056  | <a href="#">IIGGGMPVGAFGRR</a> |
| 25.6  | 1459.6725 | 0.2049  | <a href="#">EAAALQCOLEDGR</a>  |
| 25.4  | 1460.7623 | -0.8849 | <a href="#">LIFAGKQLEDGR</a>   |
| 25.4  | 1459.8293 | 0.0482  | <a href="#">LIRMIRTAGALK</a>   |
| 24.1  | 1459.7704 | 0.1070  | <a href="#">EMKLLIQSGALK</a>   |
| 24.0  | 1459.6263 | 0.2512  | <a href="#">GCQFSYAGRSNGR</a>  |

Mascot: <http://www.matrixscience.com/>



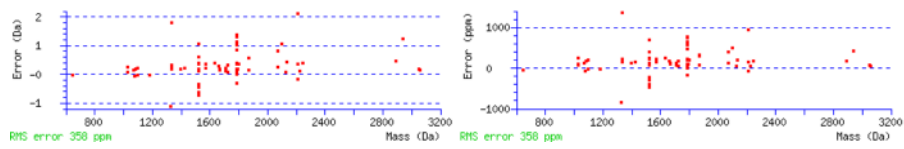

Mascot: <http://www.matrixscience.com/>

**(MATRIX) (SCIENCE) Mascot Search Results**

**Peptide View**

MS/MS Fragmentation of **TLSDYNIQKESTLHLVLR**  
 Found in **YD\_RFP-p53-Ub**, YD\_RFP-p53-Ub

Match to Query 721: 2243.591172 from(748.871000,3+) intensity(718357.0000)  
 Title: Cmpd 316, +MSn(749.52), 29.0 min  
 Data file D:\Data\2010\_10\BIT01712b\_YD\_15\_RC2\_01\_7730.d\Analysis.mgf

Click mouse within plot area to zoom in by factor of two about that point  
 Or, Plot from 200 to 1100 Da Full range  
 Label all possible matches  Label matches used for scoring

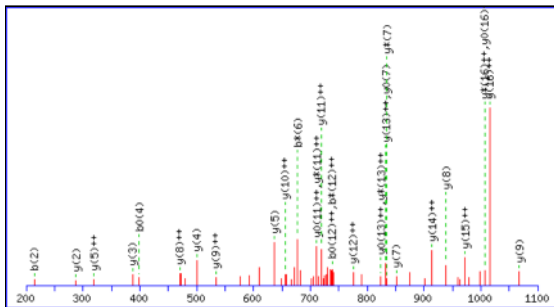

Monoisotopic mass of neutral peptide Mr(calc): 2243.1910  
 Variable modifications:  
 K9 : GlyGly (K)  
 Ions Score: 66 Expect: 0.0025  
 Matches : 30/182 fragment ions using 39 most intense peaks (help)

| #  | b         | b <sup>++</sup> | b <sup>*</sup> | b <sup>*++</sup> | b <sup>0</sup> | b <sup>0++</sup> | Seq. | y         | y <sup>++</sup> | y <sup>*</sup> | y <sup>*++</sup> | y <sup>0</sup> | y <sup>0++</sup> | #  |
|----|-----------|-----------------|----------------|------------------|----------------|------------------|------|-----------|-----------------|----------------|------------------|----------------|------------------|----|
| 1  | 102.0550  | 51.5311         |                |                  | 84.0444        | 42.5258          | T    |           |                 |                |                  |                |                  | 18 |
| 2  | 215.1390  | 108.0731        |                |                  | 197.1285       | 99.0679          | L    | 2143.1506 | 1072.0789       | 2126.1240      | 1063.5657        | 2125.1400      | 1063.0737        | 17 |
| 3  | 302.1710  | 151.5892        |                |                  | 284.1605       | 142.5839         | S    | 2030.0665 | 1015.5369       | 2013.0400      | 1007.0236        | 2012.0560      | 1006.5316        | 16 |
| 4  | 417.1980  | 209.1026        |                |                  | 399.1874       | 200.0974         | D    | 1943.0345 | 972.0209        | 1926.0080      | 963.5076         | 1925.0239      | 963.0156         | 15 |
| 5  | 580.2613  | 290.6343        |                |                  | 562.2508       | 281.6290         | Y    | 1828.0076 | 914.5074        | 1810.9810      | 905.9941         | 1809.9970      | 905.5021         | 14 |
| 6  | 694.3042  | 347.6558        | 677.2777       | 339.1425         | 676.2937       | 338.6505         | N    | 1664.9442 | 832.9758        | 1647.9177      | 824.4625         | 1646.9337      | 823.9705         | 13 |
| 7  | 807.3883  | 404.1978        | 790.3618       | 395.6845         | 789.3777       | 395.1925         | I    | 1550.9013 | 775.9543        | 1533.8748      | 767.4410         | 1532.8907      | 766.9490         | 12 |
| 8  | 935.4469  | 468.2271        | 918.4203       | 459.7138         | 917.4363       | 459.2218         | Q    | 1437.8172 | 719.4123        | 1420.7907      | 710.8990         | 1419.8067      | 710.4070         | 11 |
| 9  | 1177.5848 | 589.2960        | 1160.5582      | 580.7828         | 1159.5742      | 580.2907         | K    | 1309.7587 | 655.3830        | 1292.7321      | 646.8697         | 1291.7481      | 646.3777         | 10 |
| 10 | 1306.6274 | 653.8173        | 1289.6008      | 645.3040         | 1288.6168      | 644.8120         | E    | 1067.6208 | 534.3140        | 1050.5942      | 525.8007         | 1049.6102      | 525.3087         | 9  |
| 11 | 1393.6594 | 697.3333        | 1376.6329      | 688.8201         | 1375.6488      | 688.3281         | S    | 938.5782  | 469.7927        | 921.5516       | 461.2795         | 920.5676       | 460.7874         | 8  |
| 12 | 1494.7071 | 747.8572        | 1477.6805      | 739.3439         | 1476.6965      | 738.8519         | T    | 851.5461  | 426.2767        | 834.5196       | 417.7634         | 833.5356       | 417.2714         | 7  |
| 13 | 1607.7911 | 804.3992        | 1590.7646      | 795.8859         | 1589.7806      | 795.3939         | L    | 750.4985  | 375.7529        | 733.4719       | 367.2396         |                |                  | 6  |
| 14 | 1744.8501 | 872.9287        | 1727.8235      | 864.4154         | 1726.8395      | 863.9234         | H    | 637.4144  | 319.2108        | 620.3879       | 310.6976         |                |                  | 5  |
| 15 | 1857.9341 | 929.4707        | 1840.9076      | 920.9574         | 1839.9236      | 920.4654         | L    | 500.3555  | 250.6814        | 483.3289       | 242.1681         |                |                  | 4  |
| 16 | 1957.0025 | 979.0049        | 1939.9760      | 970.4916         | 1938.9920      | 969.9996         | V    | 387.2714  | 194.1394        | 370.2449       | 185.6261         |                |                  | 3  |
| 17 | 2070.0866 | 1035.5469       | 2053.0600      | 1027.0337        | 2052.0760      | 1026.5417        | L    | 288.2030  | 144.6051        | 271.1765       | 136.0919         |                |                  | 2  |
| 18 |           |                 |                |                  |                |                  | R    | 175.1190  | 88.0631         | 158.0924       | 79.5498          |                |                  | 1  |

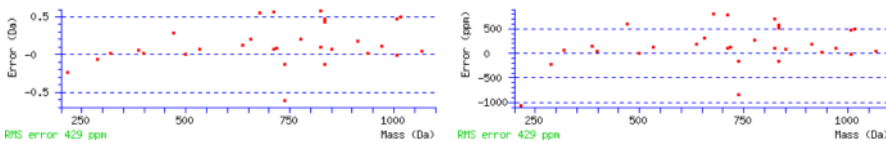

NCBI BLAST search of **TLSDYNIQKESTLHLVLR**  
 (Parameters: blastp, nr protein database, expect=20000, no filter, PAM30)  
 Other BLAST [web gateways](#)

**All matches to this query**

| Score | Mr(calc): | Delta   | Sequence                            |
|-------|-----------|---------|-------------------------------------|
| 66.1  | 2243.1910 | 0.4002  | <a href="#">TLSDYNIQKESTLHLVLR</a>  |
| 66.1  | 2244.1750 | -0.5838 | <a href="#">TLSDYNIQKESTLHLVLR</a>  |
| 66.1  | 2244.1750 | -0.5838 | <a href="#">TLSDYNIQKESTLHLVLR</a>  |
| 37.0  | 2243.2525 | 0.3387  | <a href="#">VNVDTDOIIPKQFLKSIKR</a> |
| 37.0  | 2243.2525 | 0.3387  | <a href="#">VNVDTDOIIPKQFLKSIKR</a> |
| 37.0  | 2243.2525 | 0.3387  | <a href="#">VNVDTDOIIPKQFLKSIKR</a> |
| 25.1  | 2244.1718 | -0.5807 | <a href="#">INQMPNAVQKLLVMDKRR</a>  |
| 24.7  | 2244.2365 | -0.6453 | <a href="#">VNVDTDOIIPKQFLKSIKR</a> |
| 24.7  | 2243.1181 | 0.4730  | <a href="#">AIENSQKKVEGHNFPIRK</a>  |
| 24.5  | 2243.1757 | 0.4155  | <a href="#">DVSDNSIINVSQKVNKVGK</a> |

Mascot: <http://www.matrixscience.com/>

| Sample | Substrate  | E2       | E3   | Additional factors |
|--------|------------|----------|------|--------------------|
| 2      | RFP-p53    | E2N/E2V1 | MDM2 | MDMX               |
| 3      | RFP-p53    | UBE2D3   | MDM2 | MDMX               |
| 4      | RFP-p53-Ub | UBE2D2   | -    | -                  |
| 5      | RFP-p53-Ub | UBE2D2   | MDM2 | -                  |
| 6      | RFP-p53    | UBE2D2   | MDM2 | -                  |



| Reference                                                  | #2                                             | Peptide    | MH+      | DeltaM (ppm) | z   | Type     | P (pro)  | Sf    | Score  | Coverage | MW      | Acsn     | Peptide (Hits)  |
|------------------------------------------------------------|------------------------------------------------|------------|----------|--------------|-----|----------|----------|-------|--------|----------|---------|----------|-----------------|
| Scan(s)                                                    | Peptide                                        |            |          |              |     |          | P (pep)  | Sf    | XC     | DeltaCn  | Sp      | RSp      | Ions            |
| 1 gij88702791 ref NP_002384.2  protein Mdm4 [Homo sapiens] |                                                |            |          |              |     |          | 1.22E-10 | 34.90 | 488.26 | 73.30    | 54829.6 | 88702791 | 52 (46 1 2 1 2) |
| 971                                                        | K.AGASCPICK.K                                  | 963.43872  | 0.04950  | 2            | CID | 1.66E-03 | 0.88     | 2.53  | 0.69   | 385.2    | 1       | 11/16    |                 |
| 698                                                        | K.AGASCPICK.E                                  | 1091.53368 | 1.28092  | 2            | CID | 1.23E-01 | 0.57     | 1.81  | 0.37   | 318.6    | 1       | 11/18    |                 |
| 5828                                                       | K.CIHSREDEDLIENLAQDETSR.L                      | 2544.16312 | 1.58311  | 3            | CID | 9.98E-07 | 0.84     | 4.69  | 0.05   | 993.4    | 1       | 23/80    |                 |
| 5829                                                       | K.CIHSREDEDLIENLAQDETSR.L                      | 2530.14747 | 0.80569  | 3            | CID | 3.20E-08 | 0.95     | 4.14  | 0.38   | 1652.8   | 1       | 30/80    |                 |
| 1266                                                       | R.DGNIIHGR.T                                   | 881.45879  | 1.24413  | 2            | CID | 3.54E-07 | 0.90     | 2.41  | 0.68   | 439.1    | 1       | 11/14    |                 |
| 7266                                                       | K.DPSPLYDMLR.K                                 | 1206.58234 | 0.39446  | 2            | CID | 6.18E-02 | 0.67     | 2.38  | 0.40   | 317.3    | 1       | 10/18    |                 |
| 6592                                                       | R.EDEDLIENLAQDETSR.L                           | 1876.84067 | 1.79598  | 2            | CID | 1.26E-07 | 0.96     | 4.00  | 0.67   | 1055.0   | 1       | 17/30    |                 |
| 6748                                                       | K.EVMHYLGQYIMVK.Q                              | 1610.80693 | 0.07582  | 2            | CID | 1.47E-06 | 0.94     | 3.24  | 0.74   | 603.6    | 1       | 16/24    |                 |
| 6259                                                       | K.EVMHYLGQYIM*VK.Q                             | 1626.80185 | 0.12433  | 2            | CID | 5.78E-05 | 0.89     | 3.02  | 0.64   | 522.7    | 1       | 13/24    |                 |
| 5771                                                       | K.EVM*HYLGQYIMVK.Q                             | 1626.80185 | 0.34944  | 2            | CID | 1.44E-02 | 0.72     | 1.87  | 0.54   | 381.4    | 1       | 13/24    |                 |
| 3638                                                       | K.ILHAAGAQGEM*FTVK.E                           | 1588.81519 | -0.20280 | 2            | CID | 3.00E-08 | 0.91     | 3.00  | 0.59   | 686.1    | 1       | 17/28    |                 |
| 4659                                                       | K.ILHAAGAQGEMFTVK.E                            | 1572.82027 | 0.59794  | 2            | CID | 4.91E-10 | 0.96     | 3.84  | 0.55   | 1113.6   | 1       | 22/28    |                 |
| 2786                                                       | R.ISPGQINQVRPK.L                               | 1336.76956 | -0.98979 | 2            | CID | 6.54E-05 | 0.70     | 2.10  | 0.70   | 119.0    | 1       | 11/22    |                 |
| 2499                                                       | R.ISPGQIN@QVRPK.L                              | 1337.75358 | 2.01681  | 2            | CID | 5.77E-03 | 0.35     | 2.50  | 0.04   | 189.7    | 1       | 12/22    |                 |
| 2031                                                       | R.KDWYSDCSK.L                                  | 1188.49904 | 1.67290  | 2            | CID | 3.62E-02 | 0.84     | 2.42  | 0.50   | 444.3    | 1       | 11/16    |                 |
| 3786                                                       | K.KEIQLVIK.V                                   | 970.62954  | -0.16729 | 2            | CID | 2.02E-02 | 0.92     | 2.55  | 0.69   | 435.1    | 1       | 12/14    |                 |
| 9133                                                       | K.LFDPCNSVEFLDLAHSSSESQETISSMGEQLDNLSEQR.T     | 4212.89726 | 0.59208  | 3            | CID | 2.44E-06 | 0.79     | 3.60  | 0.48   | 310.9    | 1       | 26/144   |                 |
| 8354                                                       | K.LFD*PCNSVEFLDLAHSSSESQETISSM*GEQLDNLSEQR.T   | 4242.90782 | 1.80924  | 3            | CID | 6.13E-04 | 0.38     | 3.00  | 0.01   | 392.3    | 1       | 24/144   |                 |
| 8336                                                       | K.LFDPCNSVEFLDLAHSSSESQETISSM*GEQLDNLSEQR.T    | 4228.89217 | 2.34073  | 3            | CID | 3.07E-04 | 0.89     | 5.16  | 0.13   | 825.8    | 1       | 36/144   |                 |
| 4629                                                       | K.LTHSLSTSDITAIPEK.E                           | 1712.90651 | -0.80660 | 3            | CID | 5.99E-03 | 0.52     | 2.31  | 0.44   | 309.0    | 1       | 18/60    |                 |
| 4820                                                       | K.LTHSLSTSDITAIPEKENEGNDVPD*CR.R               | 3012.42152 | 0.65591  | 3            | CID | 4.58E-03 | 0.52     | 3.15  | 0.14   | 412.5    | 1       | 20/104   |                 |
| 4763                                                       | K.LTHSLSTSDITAIPEKENEGNDVPCR.R                 | 2998.40587 | -0.55404 | 3            | CID | 9.64E-07 | 0.90     | 4.21  | 0.54   | 589.3    | 1       | 25/104   |                 |
| 4492                                                       | K.LTHSLSTSDITAIPEKENEGNDVPD*CR.R.T             | 3168.52263 | 2.05670  | 3            | CID | 8.86E-04 | 0.66     | 3.86  | 0.10   | 423.7    | 1       | 23/108   |                 |
| 5077                                                       | K.LTHSLSTSDITAIPEK\$ENEGNDVPCR.R.T             | 3197.51280 | 3.01386  | 3            | CID | 4.73E-05 | 0.34     | 3.12  | 0.58   | 218.8    | 1       | 20/108   |                 |
| 4538                                                       | K.LTHSLSTSDITAIPEKENEGN@DVPDCRR.T              | 2155.49100 | 2.43408  | 4            | CID | 1.02E-05 | 0.66     | 3.53  | 0.07   | 567.1    | 1       | 35/162   |                 |
| 4443                                                       | K.LTHSLSTSDITAIPEKENEGNDVPCR.R.T               | 3154.50698 | 1.60940  | 3            | CID | 6.37E-09 | 0.91     | 4.38  | 0.62   | 546.8    | 1       | 24/108   |                 |
| 4522                                                       | K.LTHSLSTSDITAIPEKEN@EGNDVPCR.R.T              | 3155.49100 | 1.37451  | 3            | CID | 1.29E-08 | 0.54     | 2.93  | 0.03   | 663.6    | 1       | 26/108   |                 |
| 8503                                                       | K.NLVTLATATDDAAQTLA                            | 1603.85374 | -0.26386 | 2            | CID | 5.51E-02 | 0.50     | 1.94  | 0.66   | 194.1    | 1       | 10/30    |                 |
| 9286                                                       | K.NLVTLATATDDAAQTLALAQDHSMDIPSQDQLK.Q          | 3481.74790 | 2.10203  | 3            | CID | 1.53E-03 | 0.44     | 3.25  | 0.02   | 340.5    | 1       | 23/128   |                 |
| 9042                                                       | K.NLVTLATATDDAAQTLALAQ@DHSMD*IPSQDQ@LK.Q       | 3497.73159 | 5.93374  | 4            | CID | 4.87E-05 | 0.66     | 3.66  | 0.01   | 687.9    | 1       | 37/192   |                 |
| 9042                                                       | K.NLVTLATATDDAAQTLALAQ@DHSMD*IPSQ@DQLK.Q       | 3497.73159 | 5.93374  | 4            | CID | 4.87E-05 | 0.65     | 3.61  | 0.10   | 687.9    | 1       | 37/192   |                 |
| 9010                                                       | K.NLVTLATATDDAAQTLALAQDHSM*DIPSQDQLK\$QSAEESST | 4603.20641 | -0.68369 | 4            | CID | 8.94E-02 | 0.33     | 3.14  | 0.34   | 230.0    | 1       | 28/252   |                 |
| 9187                                                       | K.QLYDQQEQHMVYCGDILLGELLGR.Q                   | 2822.32366 | -0.15790 | 3            | CID | 7.33E-03 | 0.89     | 3.87  | 0.61   | 569.9    | 1       | 22/92    |                 |
| 8738                                                       | K.QLYD*QQ@EQ@HMVYCGDILLGELLGR.Q                | 2838.30734 | 4.21593  | 3            | CID | 8.77E-05 | 0.72     | 3.64  | 0.09   | 888.6    | 1       | 26/92    |                 |
| 5236                                                       | R.QSFSVKDPSPLYD.M                              | 1482.71110 | 0.00428  | 2            | CID | 1.98E-06 | 0.52     | 1.89  | 0.38   | 323.3    | 1       | 12/24    |                 |
| 7321                                                       | R.QSFSVKDPSPLYDMLR.K                           | 1882.93676 | 0.15160  | 3            | CID | 5.53E-05 | 0.44     | 2.81  | 0.09   | 414.3    | 1       | 20/60    |                 |
| 5239                                                       | R.QSFSVKDPSPLYDM*LRK.N                         | 2027.02664 | -0.20729 | 3            | CID | 9.93E-03 | 0.20     | 2.39  | 0.11   | 185.4    | 1       | 16/64    |                 |
| 6561                                                       | R.QSFSVKDPSPLYDMLR.K.N                         | 2011.03172 | 0.75277  | 3            | CID | 8.18E-04 | 0.53     | 2.73  | 0.18   | 353.4    | 1       | 23/64    |                 |
| 5425                                                       | K.SLSDDTDVEVTSEDEWQCTECK.K                     | 2623.05022 | 2.45643  | 2            | CID | 2.46E-07 | 0.69     | 2.48  | 0.38   | 511.8    | 1       | 15/42    |                 |
| 5031                                                       | K.SLSDDTDVEVTSEDEWQCTE*CKK.F                   | 2775.16083 | 1.35186  | 3            | CID | 7.40E-04 | 0.34     | 2.89  | 0.02   | 279.0    | 1       | 21/88    |                 |
| 4471                                                       | R.TDTENM*EDCQNLLKPCSLCEK.R                     | 2601.09366 | 0.65822  | 3            | CID | 2.56E-04 | 0.67     | 3.24  | 0.00   | 732.0    | 1       | 24/80    |                 |
| 5149                                                       | R.TDTENMEDCQNLLKPCSLCEK.R                      | 2585.09874 | 0.06465  | 3            | CID | 6.26E-05 | 0.66     | 3.14  | 0.10   | 688.5    | 1       | 24/80    |                 |
| 5238                                                       | R.TDTENMED*ACQNLLKPCSLCEK.R                    | 2599.11439 | -0.08621 | 3            | CID | 2.35E-03 | 0.57     | 3.37  | 0.08   | 469.6    | 1       | 21/80    |                 |
| 2612                                                       | R.TGHLVTCFHCAR.R                               | 1458.67297 | 1.87549  | 2            | CID | 3.06E-06 | 0.94     | 3.15  | 0.50   | 1021.7   | 1       | 16/22    |                 |
| 2456                                                       | R.TISAPVVRPK.D                                 | 1067.65716 | 2.05510  | 2            | CID | 1.63E-02 | 0.32     | 2.01  | -      | 388.2    | 1       | 11/18    |                 |
| 4048                                                       | R.TTEDIPTLPTSEHK.C                             | 1683.80719 | 0.28434  | 2            | CID | 1.68E-06 | 0.87     | 3.50  | 0.61   | 283.8    | 1       | 13/28    |                 |
| 1542                                                       | K.VEAADTEQTSEEVGK.V                            | 1592.72860 | 1.50890  | 2            | CID | 3.61E-10 | 0.98     | 4.16  | 0.70   | 1670.3   | 1       | 21/28    |                 |
| 3073                                                       | K.VEAADTEQTSEEVGK\$VSDK.K                      | 2064.95677 | 1.33396  | 2            | CID | 2.00E-02 | 0.33     | 2.45  | 0.31   | 124.7    | 1       | 11/36    |                 |
| 2289                                                       | K.VEAADTEQTSEEVGK\$VSDK.V                      | 2150.04591 | 3.44419  | 3            | CID | 2.32E-03 | 0.37     | 2.42  | 0.35   | 163.7    | 1       | 17/76    |                 |
| 2828                                                       | K.VIEVGKNDLEDK.S                               | 1560.77516 | 0.80548  | 2            | CID | 1.22E-10 | 0.97     | 4.08  | 0.70   | 1222.3   | 1       | 18/26    |                 |
| 3724                                                       | K.VIEVGK\$NDDLEDK.S                            | 1603.78097 | 2.02875  | 2            | CID | 1.05E-04 | 0.79     | 2.95  | 0.27   | 446.1    | 1       | 16/26    |                 |

2 His-RFP-p53

|      |                                                  |            |          |   |     |          |       |        |       |         |           |                 |
|------|--------------------------------------------------|------------|----------|---|-----|----------|-------|--------|-------|---------|-----------|-----------------|
| 4978 | E.ALELKDAQAGK.E                                  | 1143.63681 | -7.51311 | 2 | CID | 1.70E-10 | 32.99 | 446.23 | 56.50 | 70829.9 |           | 45 (44 0 1 0 0) |
| 4568 | K.AYVKHPADIPDYLK.L                               | 1629.86352 | 1.75566  | 2 | CID | 4.61E-02 | 0.34  | 2.15   | 0.23  | 194.8   | 1         | 10/20           |
| 4245 | R.CSD^SDGLAPPQHLIR.V                             | 1679.81702 | -0.04392 | 2 | CID | 1.94E-04 | 0.94  | 3.39   | 0.58  | 967.3   | 1         | 17/26           |
| 4212 | R.CSDSDGLAPPQHLIR.V                              | 1665.80137 | 0.55696  | 2 | CID | 8.80E-04 | 0.48  | 2.79   | 0.17  | 331.6   | 1         | 12/28           |
| 1017 | K.DGGHYDAEVK.T                                   | 1090.47998 | 0.82883  | 2 | CID | 4.91E-06 | 0.74  | 2.49   | 0.65  | 240.3   | 1         | 12/28           |
| 7552 | D.DIEQWFTEDPGDEAPR.M                             | 2001.88248 | 0.19176  | 2 | CID | 1.63E-04 | 0.81  | 2.38   | 0.59  | 388.8   | 1         | 11/18           |
| 4510 | R.ELNEALELK.D                                    | 1058.57282 | 0.21651  | 2 | CID | 1.53E-02 | 0.83  | 3.22   | 0.58  | 321.0   | 1         | 13/32           |
| 3751 | R.ELNEALELKDAQAGKEPGGSR.A                        | 2212.12042 | 1.23277  | 3 | CID | 8.16E-03 | 0.39  | 1.85   | 0.38  | 231.5   | 1         | 8/16            |
| 9503 | K.GGPLPFAWDILSPQFYGSK.A                          | 2208.11242 | 0.41316  | 2 | CID | 9.28E-07 | 0.73  | 3.38   | 0.20  | 751.9   | 1         | 23/80           |
| 2762 | R.GTNFSPDGPVM*QK.K                               | 1393.64164 | -0.95799 | 2 | CID | 7.80E-08 | 0.92  | 3.46   | 0.32  | 1147.5  | 1         | 21/38           |
| 3707 | R.GTNFSPDGPVMQK.K                                | 1377.64673 | 0.30185  | 2 | CID | 9.65E-07 | 0.85  | 3.04   | 0.59  | 352.3   | 1         | 13/24           |
| 2966 | R.GTNFSPDGPVMQK.T                                | 1505.74169 | -0.93476 | 2 | CID | 1.33E-06 | 0.94  | 3.48   | 0.70  | 624.7   | 1         | 16/24           |
| 4384 | K.HPADIPDYLK.L                                   | 1168.59970 | 0.27663  | 2 | CID | 2.80E-02 | 0.31  | 1.87   | 0.39  | 215.5   | 1         | 10/26           |
| 6208 | R.HSTGAENLYFQGLEEEEPQ.S                          | 2048.91959 | 0.78099  | 2 | CID | 2.28E-07 | 0.93  | 2.39   | 0.78  | 376.7   | 1         | 15/18           |
| 6111 | R.HSTGAENLYFQGLEEEEPQSDPS.V                      | 2435.06335 | -0.23076 | 2 | CID | 3.44E-04 | 0.52  | 2.01   | 0.44  | 309.5   | 1         | 13/34           |
| 8204 | R.HSTGAENLYFQGLEEEEPQSDPSVEPPLSQETF.S            | 3562.61324 | 2.02461  | 3 | CID | 4.66E-05 | 0.87  | 3.11   | 0.59  | 545.0   | 1         | 17/42           |
| 5879 | K.KKPLDGEYFTLQIR.G                               | 1707.94283 | 0.82905  | 3 | CID | 1.08E-04 | 0.57  | 2.25   | 0.50  | 235.3   | 1         | 21/124          |
| 2837 | K.KPVQLPGAYK.T                                   | 1100.64626 | 0.25058  | 2 | CID | 3.43E-05 | 0.76  | 2.53   | 0.52  | 595.8   | 1         | 19/52           |
| 3107 | K.KPVQLPGAYK.T                                   | 1100.64626 | 0.25058  | 2 | CID | 6.04E-05 | 0.89  | 2.61   | 0.58  | 333.9   | 1         | 14/18           |
| 3107 | K.KPVQLPGAYK.T                                   | 1201.69393 | 0.17039  | 2 | CID | 1.07E-02 | 0.60  | 2.05   | 0.66  | 136.1   | 1         | 9/20            |
| 2525 | K.KTMGWEASTER.M                                  | 1295.60486 | 1.44748  | 2 | CID | 4.22E-04 | 0.83  | 2.62   | 0.50  | 510.1   | 1         | 12/20           |
| 5916 | K.LDITSHNEDYTIQEYER.A                            | 2225.03568 | 1.86971  | 2 | CID | 1.70E-10 | 0.96  | 4.56   | 0.57  | 1152.5  | 1         | 20/34           |
| 3226 | R.LGFLHSGTAK.S                                   | 1030.56801 | -1.03219 | 2 | CID | 5.53E-06 | 0.93  | 2.72   | 0.62  | 727.9   | 1         | 14/18           |
| 1283 | K.LKDGGHYDAEVK.T                                 | 1331.65901 | -0.47527 | 2 | CID | 1.70E-10 | 0.96  | 4.56   | 0.57  | 1152.5  | 1         | 20/34           |
| 2931 | K.LRGTNFPDGPVM*QK.K                              | 1662.82682 | 0.14677  | 3 | CID | 1.35E-04 | 0.88  | 2.96   | 0.41  | 739.2   | 1         | 14/22           |
| 3729 | K.LRGTNFPDGPVMQK.K                               | 1646.83190 | 1.59020  | 2 | CID | 6.44E-04 | 0.85  | 3.54   | 0.58  | 377.9   | 1         | 20/56           |
| 5721 | K.LSFPEGFK.W                                     | 924.48254  | 0.31452  | 2 | CID | 1.74E-05 | 0.87  | 2.95   | 0.61  | 388.6   | 1         | 15/28           |
| 6752 | K.LSFPEGFKWER.V                                  | 1395.70556 | -0.05017 | 2 | CID | 3.42E-02 | 0.62  | 1.81   | 0.54  | 290.5   | 1         | 8/14            |
| 4496 | R.MEGSVNGHEFEIEGEGEGRPYEGTQTAK.L                 | 3038.34323 | 1.60745  | 3 | CID | 4.75E-08 | 0.58  | 2.18   | 0.44  | 215.0   | 1         | 10/20           |
| 4795 | R.MEGSVN@GHEFEIEGEGEGRPYEGTQTAK.L                | 3039.32725 | 0.45989  | 3 | CID | 3.95E-08 | 0.84  | 3.28   | 0.41  | 812.7   | 1         | 27/108          |
| 4133 | R.M*EGSVNGHEFEIEGEGEGRPYEGTQTAK.L                | 3054.33815 | 0.90587  | 3 | CID | 2.92E-08 | 0.89  | 4.46   | 0.17  | 1011.3  | 1         | 32/108          |
| 4310 | R.M*EGSVN@GHEFEIEGEGEGRPYEGTQTAK.L               | 3055.32216 | 0.90322  | 3 | CID | 6.65E-03 | 0.46  | 2.21   | 0.36  | 193.4   | 1         | 23/108          |
| 5080 | T.QDSSLQDGEFIYK.V                                | 1529.71183 | 1.68265  | 2 | CID | 2.46E-06 | 0.70  | 3.37   | 0.42  | 159.1   | 1         | 21/108          |
| 8396 | R.RPILTIITLEDSSGNLLGR.N                          | 2068.17608 | 1.76109  | 3 | CID | 5.98E-04 | 0.39  | 2.50   | 0.09  | 286.4   | 1         | 12/24           |
| 795  | R.RTEENLNR.K                                     | 1046.52251 | -0.12020 | 2 | CID | 1.22E-02 | 0.64  | 2.52   | 0.62  | 258.7   | 1         | 16/72           |
| 4941 | D.SSLQDGEFIYK.V                                  | 1286.62631 | 0.91746  | 2 | CID | 3.22E-06 | 0.94  | 3.33   | 0.60  | 456.3   | 1         | 12/14           |
| 2930 | K.SVTCYSPALNK.M                                  | 1340.65151 | 0.92774  | 2 | CID | 2.38E-06 | 0.94  | 2.82   | 0.68  | 909.2   | 1         | 15/20           |
| 6590 | K.TCPVQLWVDSTPPPGR.V                             | 1910.94294 | 1.71113  | 2 | CID | 5.82E-05 | 0.67  | 2.01   | 0.57  | 313.5   | 1         | 11/22           |
| 2189 | K.TM*GWEASTER.M                                  | 1183.50481 | -0.10766 | 2 | CID | 2.20E-07 | 0.93  | 3.57   | 0.63  | 604.4   | 1         | 18/32           |
| 3192 | K.TYQGSYGFR.L                                    | 1078.49523 | 0.50094  | 2 | CID | 5.19E-06 | 0.97  | 3.13   | 0.65  | 1235.0  | 1         | 17/18           |
| 5116 | R.VEGNLRVEYLDDRNTFR.H                            | 2096.05194 | -1.61469 | 3 | CID | 6.13E-04 | 0.85  | 2.68   | 0.37  | 482.0   | 1         | 12/16           |
| 7376 | R.VM*NFEDGGVVTQDSSLQDGEFIYK.V                    | 2894.34005 | 1.97095  | 2 | CID | 9.87E-06 | 0.67  | 2.76   | 0.61  | 199.6   | 1         | 15/64           |
| 8001 | R.VMNFEDGGVVTQDSSLQDGEFIYK.V                     | 2878.34513 | 0.74071  | 3 | CID | 1.44E-06 | 0.57  | 2.78   | 0.16  | 452.4   | 1         | 17/50           |
| 5426 | A.YVK#HPADIPDYLK.L                               | 1672.86831 | 2.20609  | 2 | CID | 4.53E-06 | 0.88  | 4.18   | 0.41  | 665.5   | 1         | 25/100          |
| 3    | gij 260080636 gb ACX31156.1  MDM2 [Homo sapiens] |            |          |   |     | 2.95E-04 | 0.73  | 2.39   | 0.66  | 144.5   | 1         | 11/24           |
| 2593 | R.AISETEENSDLSGER.Q                              | 1765.77226 | 0.41893  | 2 | CID | 4.42E-12 | 7.65  | 146.26 | 38.80 | 52436.5 | 260080636 | 15 (13 2 0 0 0) |
| 3450 | K.AKLENSTQAEFGFVDP^CKK.T                         | 2280.08129 | 3.44588  | 3 | CID | 3.72E-07 | 0.94  | 3.04   | 0.58  | 1214.9  | 1         | 18/30           |
| 3357 | K.AKLENSTQAEFGFVDPCKK.T                          | 2266.06564 | -0.56193 | 3 | CID | 5.97E-06 | 0.89  | 4.58   | 0.27  | 687.7   | 1         | 27/76           |
| 4794 | R.CHLE^GGSDQKDLVQELQEEKPSSSHLVS RPSTSSR.R        | 3921.89958 | 0.84593  | 5 | CID | 8.67E-10 | 0.89  | 4.94   | 0.08  | 889.6   | 1         | 29/76           |
| 5142 | K.DLVQELQEEKPSSSHLVS RPSTSSR.R                   | 2796.41224 | 0.94772  | 3 | CID | 1.08E-03 | 0.71  | 3.80   | 0.08  | 635.2   | 1         | 44/272          |
| 4313 | S.DQ@K#DLVQELQEE^K.P                             | 1730.84327 | -1.38938 | 2 | CID | 4.38E-07 | 0.55  | 2.47   | 0.33  | 444.6   | 1         | 21/96           |
| 4313 | S.DQ@K#DLVQELQEE^K.P                             | 1730.84327 | -1.38938 | 2 | CID | 9.85E-02 | 0.40  | 2.07   | 0.21  | 353.7   | 1         | 11/24           |
| 9139 | R.ENWLPEDKGD\$GEISE^KAK.L                        | 2357.20957 | -0.64664 | 3 | CID | 9.85E-02 | 0.40  | 2.07   | 0.00  | 353.7   | 1         | 11/24           |
| 3393 | R.NLVVVNQESSDGSVSENR.C                           | 2249.06402 | 2.60083  | 2 | CID | 1.30E-01 | 0.21  | 2.37   | 0.10  | 251.4   | 1         | 16/76           |
|      |                                                  |            |          |   |     | 4.42E-12 | 0.98  | 5.22   | 0.37  | 1908.2  | 1         | 26/40           |

|      |                                               |            |          |   |     |          |      |        |       |        |          |                 |
|------|-----------------------------------------------|------------|----------|---|-----|----------|------|--------|-------|--------|----------|-----------------|
| 9295 | K.QQHIVYCSNDLLGDLFGVPSFSVK.E                  | 2723.34980 | 1.33233  | 3 | CID | 1.21E-03 | 0.50 | 3.11   | 0.10  | 435.1  | 1        | 21/92           |
| 4126 | K.TGHLMACFTCAK.K                              | 1396.61710 | 1.14867  | 2 | CID | 2.62E-05 | 0.70 | 2.53   | 0.35  | 419.4  | 1        | 12/22           |
| 8463 | T.VYQAGESDTSFEEDPEISLADYWK.C                  | 2894.25267 | 1.54001  | 2 | CID | 1.31E-09 | 0.35 | 1.84   | 0.19  | 326.6  | 1        | 17/48           |
| 4    | gij 51703339 sp P62988.1 UBIQ_HUMAN Ubiquitin |            |          |   |     | 1.79E-09 | 7.70 | 110.21 | 89.50 | 8559.6 | 51703339 | 11 (11 0 0 0 0) |
| 1438 | K.AKIQDKEGIPPDQQR.L                           | 1722.91332 | 0.31522  | 2 | CID | 7.54E-04 | 0.70 | 2.65   | 0.58  | 254.9  | 1        | 11/28           |
| 4718 | K.ESTLHLVLR.L                                 | 1067.62077 | -1.71000 | 2 | CID | 4.23E-07 | 0.78 | 2.10   | 0.69  | 151.5  | 1        | 10/16           |
| 1469 | K.IQDKEGIPPDQQR.L                             | 1523.78125 | 0.35425  | 2 | CID | 1.79E-09 | 0.96 | 3.86   | 0.65  | 720.6  | 1        | 19/24           |
| 5625 | R.LIFAGK\$QLEDGR.T                            | 1389.74849 | -0.11018 | 2 | CID | 4.51E-05 | 0.93 | 3.18   | 0.62  | 599.9  | 1        | 16/22           |
| 6658 | R.LIFAGK\$QLEDGRTLSDYNIQK.E                   | 2452.28307 | 0.11962  | 3 | CID | 1.25E-02 | 0.53 | 2.29   | 0.43  | 269.9  | 1        | 20/80           |
| 6113 | K.TITLEVEPSDTIENVK.A                          | 1787.92730 | 1.36134  | 2 | CID | 4.50E-08 | 0.94 | 3.15   | 0.62  | 839.0  | 1        | 20/30           |
| 6234 | K.TITLEVEPSDTIEN@VK\$AK.I                     | 2030.06519 | 1.88340  | 2 | CID | 5.65E-06 | 0.48 | 2.60   | 0.13  | 346.6  | 1        | 15/34           |
| 6228 | R.TLSDYNIQK#ESTLHLVLR.L                       | 2244.19724 | 0.13964  | 2 | CID | 6.15E-08 | 0.68 | 3.04   | 0.15  | 541.0  | 1        | 15/34           |
| 6110 | R.TLSDYNIQKESTLHLVLR.L                        | 2130.15534 | -1.59299 | 3 | CID | 7.47E-06 | 0.82 | 2.93   | 0.54  | 505.7  | 1        | 24/68           |
| 6921 | K.TLTGK\$TITLEVEPSDTIENVK.A                   | 2331.22896 | -1.01003 | 2 | CID | 4.52E-02 | 0.17 | 2.91   | 0.12  | 107.4  | 1        | 8/40            |
| 5793 | F.VK#TLTGK\$TITLEVEPSDTIENVK.A                | 2671.45023 | 1.28088  | 3 | CID | 2.10E-04 | 0.70 | 4.27   | 0.01  | 485.1  | 1        | 23/88           |

M\* +15.99492) (KS# +114.04190) (NQ@ +0.98402) (DE^ +14.01565) (STY~ +79.96633) (K\$ +42.02180) C=160.03068 Enzyme:None selected

| Reference #3 | Scan(s)                                                  | Peptide                              | MH+        | DeltaM (ppm) | z | Type | P (pro)  | Sf    | Score  | Coverage | MW      | Accession | Peptide (Hits)  |
|--------------|----------------------------------------------------------|--------------------------------------|------------|--------------|---|------|----------|-------|--------|----------|---------|-----------|-----------------|
|              |                                                          |                                      |            |              |   |      | P (pep)  | Sf    | XC     | DeltaCn  | Sp      | RSp       | Ions            |
| 1            | His-RFP-p53                                              |                                      |            |              |   |      | 2.94E-11 | 31.82 | 440.22 | 44.90    | 70829.9 |           | 44 (44 0 0 0 0) |
|              | 4291                                                     | K.AYVKHPADIPDYLK.L                   | 1629.86352 | -1.47312     | 3 | CID  | 1.81E-03 | 0.84  | 3.01   | 0.63     | 553.4   | 1         | 19/52           |
|              | 4027                                                     | R.CSDSDGLAPPQHLIR.V                  | 1665.80137 | -0.10256     | 2 | CID  | 1.10E-05 | 0.67  | 2.11   | 0.63     | 242.5   | 1         | 12/28           |
|              | 4048                                                     | R.CSD^SDGLAPPQHLIR.V                 | 1679.81702 | 0.24676      | 2 | CID  | 8.82E-04 | 0.28  | 2.36   | 0.21     | 256.8   | 1         | 10/28           |
|              | 3919                                                     | K.DAQ@AGKEPGGSRAH.S                  | 1381.64548 | -3.30374     | 2 | CID  | 8.66E-02 | 0.11  | 1.82   | 0.37     | 113.3   | 1         | 7/26            |
|              | 956                                                      | K.DGGHYDAEVK.T                       | 1090.47998 | 0.26912      | 2 | CID  | 1.45E-04 | 0.83  | 2.38   | 0.51     | 501.7   | 1         | 12/18           |
|              | 4284                                                     | R.ELNEALELK.D                        | 1058.57282 | -0.24476     | 2 | CID  | 6.34E-04 | 0.60  | 1.99   | 0.41     | 383.0   | 1         | 9/16            |
|              | 3604                                                     | R.ELNEALELKDAQAGKEPGGSRA             | 2212.12042 | 0.15671      | 3 | CID  | 5.34E-09 | 0.81  | 3.93   | 0.13     | 883.2   | 1         | 26/80           |
|              | 4184                                                     | R.ERFEMFR.E                          | 1014.48256 | -0.09095     | 2 | CID  | 1.49E-04 | 0.67  | 1.85   | 0.51     | 130.6   | 1         | 8/12            |
|              | 3528                                                     | R.GTNFSPDGPVMQK.K                    | 1377.64673 | 2.33983      | 2 | CID  | 4.14E-08 | 0.96  | 3.97   | 0.67     | 729.3   | 1         | 18/24           |
|              | 2686                                                     | R.GTNFSPDGPVM*QK.K                   | 1393.64164 | 0.79383      | 2 | CID  | 2.05E-08 | 0.95  | 3.76   | 0.52     | 808.9   | 1         | 18/24           |
|              | 3794                                                     | R.GTNFSPDGPVMQK\$K.T                 | 1548.74751 | 0.30148      | 2 | CID  | 6.45E-02 | 0.11  | 1.86   | 0.00     | 197.7   | 1         | 11/26           |
|              | 2854                                                     | R.GTNFSPDGPVMQK.K.T                  | 1505.74169 | -0.04299     | 2 | CID  | 2.67E-02 | 0.42  | 2.09   | 0.46     | 197.9   | 1         | 10/26           |
|              | 4138                                                     | K.HPADIPDYLK.L                       | 1168.59970 | 0.27663      | 2 | CID  | 3.89E-07 | 0.93  | 2.33   | 0.83     | 357.8   | 1         | 15/18           |
|              | 5676                                                     | R.HSTGAENLYFQGLEEEEPQ.S              | 2048.91959 | 0.90014      | 2 | CID  | 1.31E-06 | 0.94  | 3.65   | 0.53     | 797.6   | 1         | 20/34           |
|              | 5609                                                     | R.HSTGAENLYFQGLEEEEPQSDPS.V          | 2435.06335 | 1.37341      | 2 | CID  | 3.49E-07 | 0.89  | 3.21   | 0.59     | 623.2   | 1         | 18/42           |
|              | 6490                                                     | R.HSTGAENLYFQGLEEEEPQSDPSVEPPLSQET.F | 3415.54483 | 1.87757      | 3 | CID  | 2.78E-02 | 0.56  | 2.40   | 0.44     | 251.7   | 1         | 20/120          |
|              | 5405                                                     | K.KKPLDGEYFTLQIR.G                   | 1707.94283 | 0.18580      | 3 | CID  | 5.31E-05 | 0.91  | 3.47   | 0.71     | 672.5   | 1         | 20/52           |
|              | 2794                                                     | K.KPVQLPGAYK.T                       | 1100.64626 | -0.41487     | 2 | CID  | 2.24E-06 | 0.92  | 2.76   | 0.70     | 409.3   | 1         | 14/18           |
|              | 2949                                                     | K.KPVQLPGAYKTD.I                     | 1316.72088 | -0.18911     | 2 | CID  | 2.69E-05 | 0.60  | 2.11   | 0.39     | 292.4   | 1         | 12/22           |
|              | 2355                                                     | K.KTMGWEASTER.M                      | 1295.60486 | 0.69373      | 2 | CID  | 4.16E-06 | 0.72  | 2.12   | 0.51     | 259.9   | 1         | 12/20           |
|              | 5462                                                     | K.LDITSHNEDYTIQEYER.A                | 2225.03568 | 1.32109      | 2 | CID  | 2.94E-11 | 0.94  | 4.01   | 0.52     | 933.5   | 1         | 18/34           |
|              | 3043                                                     | R.LGFLHSGTAK.S                       | 1030.56801 | 0.98145      | 2 | CID  | 1.01E-04 | 0.84  | 2.32   | 0.44     | 578.4   | 1         | 13/18           |
|              | 1151                                                     | K.LKDGGHYDAEVK.T                     | 1331.65901 | -0.29194     | 2 | CID  | 4.38E-08 | 0.93  | 3.23   | 0.41     | 1066.5  | 1         | 16/22           |
|              | 3572                                                     | K.LRGTNFPDGPVMQK.K                   | 1646.83190 | 0.62658      | 2 | CID  | 1.89E-06 | 0.45  | 2.12   | 0.44     | 203.9   | 1         | 11/28           |
|              | 2850                                                     | K.LRGTNFPDGPVM*QK.K                  | 1662.82682 | -1.06452     | 3 | CID  | 2.34E-03 | 0.51  | 2.52   | 0.19     | 554.3   | 1         | 20/56           |
|              | 5304                                                     | K.LSFPEGFK.W                         | 924.48254  | -0.08160     | 2 | CID  | 7.17E-05 | 0.82  | 1.93   | 0.60     | 426.2   | 1         | 10/14           |
|              | 6084                                                     | K.LSFPEGFKWER.V                      | 1395.70556 | -0.92478     | 2 | CID  | 2.02E-08 | 0.83  | 2.05   | 0.53     | 404.0   | 1         | 14/20           |
|              | 4538                                                     | R.MEGSVN@GHEFEIEGEGEGRPYEGTQAK.L     | 3039.32725 | 0.27916      | 3 | CID  | 3.65E-09 | 0.83  | 3.83   | 0.25     | 755.2   | 1         | 29/108          |
|              | 4118                                                     | R.M*EGSVN@GHEFEIEGEGEGRPYEGTQAK.L    | 3055.32216 | 0.00427      | 3 | CID  | 1.21E-05 | 0.78  | 3.50   | 0.42     | 313.9   | 1         | 26/108          |
|              | 3946                                                     | R.M*EGSVNGHEFEIEGEGEGRPYEGTQAK.L     | 3054.33815 | 2.58445      | 3 | CID  | 1.09E-03 | 0.41  | 2.53   | 0.24     | 235.0   | 1         | 21/108          |
|              | 4261                                                     | R.MEGSVNGHEFEIEGEGEGRPYEGTQAK.L      | 3038.34323 | 2.02930      | 3 | CID  | 1.69E-06 | 0.93  | 4.20   | 0.60     | 881.3   | 1         | 30/108          |
|              | 4925                                                     | R.MEGSVNGHEFEIEGEGEGRPYEGTQAK\$K.V   | 3323.51209 | 0.59159      | 4 | CID  | 8.28E-06 | 0.78  | 4.38   | 0.02     | 756.6   | 1         | 35/174          |
|              | 4826                                                     | H.PADIPDYLK.L                        | 1031.54079 | 1.09512      | 2 | CID  | 1.36E-03 | 0.75  | 2.05   | 0.38     | 481.7   | 1         | 11/16           |
|              | 3593                                                     | K.PVQLPGAYK.T                        | 972.55129  | 0.33842      | 2 | CID  | 2.03E-04 | 0.84  | 2.11   | 0.55     | 597.5   | 1         | 11/16           |
|              | 4797                                                     | T.QDSSLQDGEFIYK.V                    | 1529.71183 | 1.20385      | 2 | CID  | 3.52E-04 | 0.33  | 2.61   | 0.07     | 254.5   | 1         | 11/24           |
|              | 710                                                      | R.RTEENLR.K                          | 1046.52251 | -0.58677     | 2 | CID  | 1.34E-06 | 0.85  | 2.28   | 0.65     | 268.5   | 1         | 10/14           |
|              | 4673                                                     | D.SSLQDGEFIYK.V                      | 1286.62631 | 0.25333      | 2 | CID  | 1.99E-06 | 0.91  | 2.71   | 0.70     | 565.7   | 1         | 13/20           |
|              | 2884                                                     | K.SVTCTYSPALNK.M                     | 1340.65151 | 0.38142      | 2 | CID  | 1.37E-07 | 0.88  | 2.76   | 0.62     | 522.3   | 1         | 13/22           |
|              | 5983                                                     | K.TCPVQLWVDSTPPPGTR.V                | 1910.94294 | 0.49741      | 2 | CID  | 2.09E-08 | 0.82  | 2.38   | 0.63     | 428.7   | 1         | 16/32           |
|              | 2159                                                     | K.TM*GWEASTER.M                      | 1183.50481 | -0.62337     | 2 | CID  | 1.08E-04 | 0.84  | 2.32   | 0.60     | 529.3   | 1         | 11/18           |
|              | 3116                                                     | K.TMGWEASTER.M                       | 1167.50990 | -0.17776     | 2 | CID  | 2.66E-04 | 0.93  | 2.61   | 0.66     | 756.6   | 1         | 14/18           |
|              | 3738                                                     | R.VEYLDDRRNTR.H                      | 1427.69137 | 0.23082      | 2 | CID  | 6.59E-05 | 0.61  | 1.97   | 0.54     | 203.5   | 1         | 10/20           |
|              | 5065                                                     | A.YVK#HPADIPDYLK.L                   | 1672.86831 | 0.38183      | 2 | CID  | 2.94E-04 | 0.52  | 2.12   | 0.50     | 151.3   | 1         | 10/24           |
| 2            | gij88702791[ref NP_002384.2  protein Mdm4 [Homo sapiens] |                                      |            |              |   |      | 2.80E-12 | 23.60 | 348.24 | 48.20    | 54829.6 | 88702791  | 35 (34 1 0 0 0) |
|              | 902                                                      | K.AGASCPICK.K                        | 963.43872  | -1.28088     | 2 | CID  | 2.44E-04 | 0.89  | 2.56   | 0.74     | 346.8   | 1         | 11/16           |
|              | 5375                                                     | K.CIHSRE^DEDLIENLAQDETSR.L           | 2544.16312 | 0.07172      | 3 | CID  | 3.10E-05 | 0.88  | 4.74   | 0.03     | 1064.1  | 1         | 27/80           |
|              | 5375                                                     | K.CIHSRED^EDLIENLAQDETSR.L           | 2544.16312 | 0.07172      | 3 | CID  | 3.10E-05 | 0.86  | 4.58   | 0.10     | 1064.1  | 1         | 27/80           |
|              | 989                                                      | R.DGNIIHGR.T                         | 881.45879  | 0.13624      | 2 | CID  | 3.10E-05 | 0.93  | 2.53   | 0.66     | 612.8   | 1         | 12/14           |
|              | 6484                                                     | K.DPSPLYDMLR.K                       | 1206.58234 | -0.21257     | 2 | CID  | 1.71E-01 | 0.62  | 1.96   | 0.33     | 397.8   | 1         | 11/18           |
|              | 5995                                                     | R.EDEDLIENLAQDETSR.L                 | 1876.84067 | 1.53582      | 2 | CID  | 1.23E-08 | 0.96  | 3.22   | 0.63     | 1502.6  | 1         | 20/30           |
|              | 5701                                                     | K.EVMHYLGQYIM*VK.Q                   | 1626.80185 | 1.55003      | 2 | CID  | 8.63E-05 | 0.92  | 3.05   | 0.60     | 676.2   | 1         | 15/24           |

|      |                                                 |            |          |   |     |          |      |        |       |         |           |                 |
|------|-------------------------------------------------|------------|----------|---|-----|----------|------|--------|-------|---------|-----------|-----------------|
| 6085 | K.EVMHYLGQYIMVK.Q                               | 1610.80693 | 0.37895  | 2 | CID | 1.44E-06 | 0.94 | 3.08   | 0.68  | 855.7   | 1         | 15/24           |
| 5342 | K.EVM*HYLGQYIMVK.Q                              | 1626.80185 | 0.19936  | 2 | CID | 2.21E-05 | 0.61 | 2.24   | 0.54  | 246.2   | 1         | 10/24           |
| 4396 | K.ILHAAGAQAQGFVTK.E                             | 1572.82027 | 0.90838  | 2 | CID | 4.67E-10 | 0.91 | 3.46   | 0.34  | 845.9   | 1         | 18/28           |
| 3473 | K.ILHAAGAQAQEM*FTVK.E                           | 1588.81519 | 1.25699  | 2 | CID | 1.64E-06 | 0.95 | 3.10   | 0.64  | 1037.4  | 1         | 19/28           |
| 2707 | R.ISPGQINQVRPK.L                                | 1336.76956 | -0.07662 | 2 | CID | 8.38E-04 | 0.74 | 2.02   | 0.79  | 116.1   | 1         | 11/22           |
| 2407 | R.ISPGQIN@QVRPK.L                               | 1337.75358 | 0.28305  | 2 | CID | 2.30E-03 | 0.31 | 2.21   | 0.08  | 178.7   | 1         | 12/22           |
| 3562 | K.KEIQLVIK.V                                    | 970.62954  | -0.73323 | 2 | CID | 1.62E-02 | 0.86 | 1.84   | 0.78  | 366.2   | 1         | 10/14           |
| 3157 | K.K\$VIEVGKNDLED\$K.S                           | 1731.87594 | 0.96685  | 2 | CID | 8.41E-05 | 0.62 | 2.60   | 0.42  | 123.1   | 1         | 13/28           |
| 2263 | K.KVIEVGKNDLED\$K.S                             | 1688.87012 | 1.39946  | 2 | CID | 6.14E-06 | 0.66 | 2.58   | 0.57  | 163.2   | 1         | 11/28           |
| 4388 | K.LTHSLSTSDITAIPEK.E                            | 1712.90651 | 1.22445  | 3 | CID | 2.33E-03 | 0.43 | 2.52   | 0.41  | 258.3   | 1         | 14/60           |
| 4521 | K.LTHSLSTSDITAIPEKENEGNDVPDCR.R                 | 2998.40587 | 0.66731  | 3 | CID | 9.69E-06 | 0.91 | 4.05   | 0.62  | 709.8   | 1         | 25/104          |
| 4575 | K.LTHSLSTSDITAIPEKENEGNDVPD^CR.R                | 3012.42152 | 0.35199  | 3 | CID | 1.50E-08 | 0.62 | 2.37   | 0.26  | 700.8   | 1         | 26/104          |
| 4257 | K.LTHSLSTSDITAIPEKENEGNDVPD^CRR.T               | 3168.52263 | 1.01650  | 3 | CID | 1.40E-05 | 0.36 | 2.39   | 0.17  | 299.3   | 1         | 21/108          |
| 4288 | K.LTHSLSTSDITAIPEKENEGNDVPDCRR.T                | 3155.49100 | 2.12460  | 4 | CID | 2.56E-05 | 0.66 | 3.75   | 0.06  | 499.0   | 1         | 32/162          |
| 4215 | K.LTHSLSTSDITAIPEKENEGNDVPDCRR.T                | 3154.50698 | 1.60940  | 3 | CID | 2.80E-12 | 0.92 | 4.33   | 0.54  | 732.5   | 1         | 30/108          |
| 6350 | A.QGEM^MFTVKEMHYLGQY-IM^V.K                     | 2513.13145 | -4.20580 | 3 | CID | 1.67E-01 | 0.42 | 2.60   | 0.25  | 366.5   | 1         | 22/114          |
| 6521 | R.QSFSVKDPSPLYDMLR.K                            | 1882.93676 | 1.90914  | 2 | CID | 1.95E-03 | 0.17 | 1.87   | 0.16  | 202.1   | 1         | 11/30           |
| 5956 | R.QSFSVKDPSPLYDMLR.K.N                          | 2011.03172 | 0.11542  | 3 | CID | 3.49E-03 | 0.39 | 2.47   | 0.27  | 231.7   | 1         | 18/64           |
| 4741 | K.SLSDDTDVEVTSSEDEWQCTE^CKK.F                   | 2775.16083 | 1.74774  | 3 | CID | 5.50E-03 | 0.14 | 2.26   | 0.06  | 138.4   | 1         | 15/88           |
| 4837 | R.TDTENMEDCQNLKPCSLCEK.R                        | 2585.09874 | 0.77296  | 3 | CID | 5.66E-05 | 0.33 | 2.34   | 0.02  | 524.1   | 1         | 22/80           |
| 4857 | R.TDTENMEDCQNLKPCSLCE^K.R                       | 2599.11439 | 1.60457  | 3 | CID | 1.37E-04 | 0.44 | 2.49   | 0.22  | 383.1   | 1         | 19/80           |
| 4285 | R.TDTENM^EDCQNLKPCSLCEK.R                       | 2601.09366 | 0.44703  | 3 | CID | 2.90E-03 | 0.23 | 2.26   | 0.03  | 386.2   | 1         | 19/80           |
| 2448 | R.TGHLVTCFHCAR.R                                | 1458.67297 | -0.87444 | 3 | CID | 3.36E-08 | 0.93 | 3.42   | 0.69  | 671.6   | 1         | 25/44           |
| 3874 | R.TTEDDIPTLPTSEHK.C                             | 1683.80719 | 1.29929  | 2 | CID | 2.98E-02 | 0.62 | 2.40   | 0.45  | 295.9   | 1         | 12/28           |
| 1522 | K.VEAADTEQTSEEVGK.V                             | 1592.72860 | 1.73883  | 2 | CID | 3.35E-11 | 0.97 | 3.81   | 0.70  | 1769.6  | 1         | 21/28           |
| 2515 | K.VEAADTEQTSEEVGK\$SDK.K                        | 2021.95095 | 1.22014  | 2 | CID | 1.41E-07 | 0.74 | 3.75   | 0.03  | 590.2   | 1         | 17/36           |
| 3626 | K.VIEVGK\$NDDLED\$K.S                           | 1603.78097 | 0.35424  | 2 | CID | 3.35E-04 | 0.71 | 2.85   | 0.34  | 350.1   | 1         | 13/26           |
| 2752 | K.VIEVGKNDLED\$K.S                              | 1560.77516 | 0.49263  | 2 | CID | 3.69E-08 | 0.95 | 3.32   | 0.65  | 946.1   | 1         | 18/26           |
| 3    | gij 51703339 sp P62988.1 UBIQ_HUMAN Ubiquitin   |            |          |   |     | 4.30E-11 | 9.57 | 120.21 | 89.50 | 8559.6  | 51703339  | 12 (12 0 0 0 0) |
| 1340 | K.AKIQDKEGIPPDQQR.L                             | 1722.91332 | 1.09459  | 2 | CID | 3.24E-05 | 0.92 | 3.45   | 0.58  | 659.1   | 1         | 16/28           |
| 4494 | K.ESTLHLVLR.L                                   | 1067.62077 | 0.34809  | 2 | CID | 1.20E-06 | 0.93 | 2.86   | 0.76  | 252.6   | 1         | 13/16           |
| 1407 | K.IQDKEGIPPDQQR.L                               | 1523.78125 | -1.00762 | 2 | CID | 4.30E-11 | 0.96 | 3.92   | 0.70  | 726.9   | 1         | 19/24           |
| 4363 | R.LIFAGK\$QLEDGR.T                              | 1460.78458 | 1.51633  | 2 | CID | 3.90E-08 | 0.90 | 2.95   | 0.56  | 727.2   | 1         | 13/22           |
| 5239 | R.LIFAGK\$QLEDGR.T                              | 1389.74849 | 1.20736  | 2 | CID | 1.64E-06 | 0.97 | 4.12   | 0.70  | 802.4   | 1         | 18/22           |
| 3708 | K.QLEDGRTLSDYNIQK.E                             | 1779.88717 | -0.13016 | 3 | CID | 1.27E-02 | 0.50 | 2.38   | 0.47  | 249.7   | 1         | 15/56           |
| 4427 | E.STLHLVLR.L                                    | 938.57818  | -0.71962 | 2 | CID | 2.41E-07 | 0.86 | 2.28   | 0.78  | 309.3   | 1         | 9/14            |
| 5621 | K.TITLEVEPSDTIENVK.A                            | 1787.92730 | 1.90754  | 2 | CID | 3.85E-05 | 0.94 | 3.60   | 0.60  | 766.1   | 1         | 19/30           |
| 5716 | K.TITLEVEPSDTIENVK\$AK.I                        | 2030.06519 | 1.04157  | 2 | CID | 1.10E-03 | 0.21 | 2.19   | 0.05  | 249.2   | 1         | 13/34           |
| 2840 | R.TLSDYNIQK.E                                   | 1081.55242 | 0.00036  | 2 | CID | 1.95E-06 | 0.90 | 2.05   | 0.63  | 479.1   | 1         | 14/16           |
| 5547 | K.TLTGK#TITLEVEPSDTIENVK.A                      | 2402.26505 | 1.07274  | 2 | CID | 4.61E-05 | 0.80 | 3.67   | 0.09  | 743.3   | 1         | 18/40           |
| 5337 | F.VK#TLTGK(\$-1)TITLEVEPSDTIENVK.A              | 2671.45023 | 1.76068  | 3 | CID | 4.75E-03 | 0.69 | 3.90   | 0.02  | 545.0   | 1         | 26/88           |
| 4    | gij 260080636 gb ACX31156.1 MDM2 [Homo sapiens] |            |          |   |     | 1.08E-11 | 2.62 | 30.23  | 12.20 | 52436.5 | 260080636 | 3 (3 0 0 0 0)   |
| 2551 | R.AISETEENSDEL\$GER.Q                           | 1765.77226 | 0.28067  | 2 | CID | 5.70E-08 | 0.86 | 2.57   | 0.41  | 763.9   | 1         | 18/30           |
| 3324 | K.AKLENSTQAEEGFDV^CKK.T                         | 2280.08129 | 0.79577  | 3 | CID | 8.06E-05 | 0.78 | 4.25   | 0.20  | 342.9   | 1         | 24/76           |
| 3315 | R.NLVVVNQESSDSGTSVSENR.C                        | 2249.06402 | 2.27518  | 2 | CID | 1.08E-11 | 0.98 | 4.64   | 0.43  | 2255.9  | 1         | 27/40           |

M\* +15.99492) (KS# +114.04190) (NQ@ +0.98402) (DE^ +14.01565) (STY~ +79.96633) (K\$ +43.006) C=160.03068 Enzyme:None selected

| Reference #4 | Scan(s)                                       | Peptide                            | MH+        | DeltaM (ppm) | z | Type | P (pro)  | Sf    | Score  | Coverage | MW      | Accession | Peptide (Hits)  |
|--------------|-----------------------------------------------|------------------------------------|------------|--------------|---|------|----------|-------|--------|----------|---------|-----------|-----------------|
|              |                                               |                                    |            |              |   |      | P (pep)  | Sf    | XC     | DeltaCn  | Sp      | RSp       | Ions            |
| 1            | His-RFP-p53                                   |                                    |            |              |   |      | 2.21E-11 | 21.07 | 260.26 | 40.30    | 70829.9 |           | 26 (26 0 0 0 0) |
|              | 4443                                          | K.AYVKHPADIPDYLK.L                 | 1629.86352 | -0.46202     | 3 | CID  | 2.85E-04 | 0.83  | 2.86   | 0.43     | 785.8   | 1         | 22/52           |
|              | 4167                                          | R.CSDSDGLAPPQHLIR.V                | 1665.80137 | -0.07399     | 3 | CID  | 1.36E-03 | 0.74  | 2.79   | 0.55     | 361.0   | 1         | 19/56           |
|              | 2031                                          | E.D^GALK#GEIKM.R                   | 1189.62351 | -2.10248     | 3 | CID  | 2.83E-03 | 0.60  | 2.30   | 0.26     | 640.8   | 1         | 16/36           |
|              | 956                                           | K.DGGHYDAEVK.T                     | 1090.47998 | 0.38106      | 2 | CID  | 3.34E-04 | 0.70  | 2.08   | 0.43     | 399.5   | 1         | 11/18           |
|              | 3746                                          | R.ELNEALELKDAQAGKEPGGSR.A          | 2212.12042 | 0.40503      | 3 | CID  | 5.92E-05 | 0.78  | 4.46   | 0.11     | 643.6   | 1         | 21/80           |
|              | 2739                                          | R.GTNFSPDGPVM*QK.K                 | 1393.64164 | 4.03469      | 2 | CID  | 4.02E-06 | 0.91  | 3.42   | 0.59     | 592.0   | 1         | 14/24           |
|              | 3682                                          | R.GTNFSPDGPVMQK.K                  | 1377.64673 | 2.16261      | 2 | CID  | 2.45E-05 | 0.82  | 2.72   | 0.65     | 321.1   | 1         | 12/24           |
|              | 4295                                          | K.HPADIPDYLK.L                     | 1168.59970 | 0.59000      | 2 | CID  | 1.28E-07 | 0.93  | 2.41   | 0.82     | 373.9   | 1         | 15/18           |
|              | 6193                                          | R.HSTGAENLYFQGLEEEEPQ.S            | 2048.91959 | 0.54268      | 2 | CID  | 1.36E-06 | 0.90  | 3.62   | 0.46     | 686.1   | 1         | 16/34           |
|              | 2757                                          | K.KPVQLPGAYK.T                     | 1100.64626 | 4.68689      | 2 | CID  | 2.02E-04 | 0.88  | 2.65   | 0.64     | 396.2   | 1         | 12/18           |
|              | 5931                                          | K.LDITSHNEDYTIQYER.A               | 2225.03568 | -0.43450     | 2 | CID  | 4.47E-10 | 0.91  | 3.46   | 0.55     | 664.1   | 1         | 17/34           |
|              | 3028                                          | R.LGFLHSGTAK.S                     | 1030.56801 | -0.67685     | 2 | CID  | 1.20E-04 | 0.92  | 2.89   | 0.64     | 669.0   | 1         | 13/18           |
|              | 1089                                          | K.LKDGGHYDAEVK.T                   | 1331.65901 | -0.10860     | 2 | CID  | 1.96E-08 | 0.93  | 3.43   | 0.50     | 928.9   | 1         | 15/22           |
|              | 2955                                          | K.LRGTNFPDGPVM*QK.K                | 1662.82682 | -0.28561     | 2 | CID  | 7.56E-02 | 0.44  | 1.81   | 0.45     | 220.0   | 1         | 12/28           |
|              | 6696                                          | K.LSFPEGFKWER.V                    | 1395.70556 | 1.26175      | 2 | CID  | 2.08E-09 | 0.48  | 2.07   | 0.38     | 150.6   | 1         | 10/20           |
|              | 4336                                          | R.M*EGSVN@GHEFEIEGEGEGRPYEGTQTAK.L | 3055.32216 | -0.31976     | 4 | CID  | 3.13E-10 | 0.89  | 3.98   | 0.53     | 715.9   | 1         | 36/162          |
|              | 4484                                          | R.MEGSVNGHEFEIEGEGEGRPYEGTQTAK.L   | 3038.34323 | 2.75248      | 3 | CID  | 8.89E-07 | 0.95  | 5.17   | 0.58     | 787.7   | 1         | 29/108          |
|              | 4128                                          | R.M*EGSVNGHEFEIEGEGEGRPYEGTQTAK.L  | 3054.33815 | -0.03774     | 4 | CID  | 1.63E-03 | 0.76  | 3.31   | 0.50     | 350.2   | 1         | 24/162          |
|              | 4642                                          | R.MEGSVN@GHEFEIEGEGEGRPYEGTQTAK.L  | 3039.32725 | 2.50381      | 4 | CID  | 2.93E-08 | 0.83  | 3.79   | 0.42     | 487.3   | 1         | 36/162          |
|              | 656                                           | R.RTEENLR.K                        | 1046.52251 | -0.47013     | 2 | CID  | 1.46E-05 | 0.93  | 3.12   | 0.53     | 562.9   | 1         | 12/14           |
|              | 4921                                          | D.SSLQDGEFIYK.V                    | 1286.62631 | 0.82258      | 2 | CID  | 6.73E-05 | 0.71  | 2.27   | 0.55     | 225.1   | 1         | 11/20           |
|              | 2991                                          | K.SVTCTYSPALNK.M                   | 1340.65151 | -1.62175     | 2 | CID  | 6.07E-06 | 0.85  | 2.56   | 0.60     | 487.5   | 1         | 13/22           |
|              | 6563                                          | K.TCPVQLWVDSTPPPGTR.V              | 1910.94294 | 1.00845      | 2 | CID  | 2.21E-11 | 0.93  | 3.66   | 0.67     | 535.5   | 1         | 17/32           |
|              | 2141                                          | K.TM*GWEASTER.M                    | 1183.50481 | 0.40806      | 2 | CID  | 1.75E-05 | 0.87  | 2.51   | 0.67     | 488.0   | 1         | 11/18           |
|              | 3232                                          | K.TMGWEASTER.M                     | 1167.50990 | 0.76325      | 2 | CID  | 1.59E-02 | 0.90  | 2.69   | 0.70     | 523.9   | 1         | 12/18           |
|              | 7307                                          | R.VM*NFEDGGVVTQDSSLQDGEFIYK.V      | 2894.34005 | 0.70104      | 3 | CID  | 1.25E-03 | 0.68  | 3.64   | 0.08     | 568.9   | 1         | 26/100          |
| 2            | gij 51703339 sp P62988.1 UBIQ_HUMAN Ubiquitin |                                    |            |              |   |      | 7.04E-13 | 11.55 | 154.22 | 89.50    | 8559.6  | 51703339  | 16 (13 3 0 0 0) |
|              | 1352                                          | K.AKIQDKEGIPPDQQR.L                | 1722.91332 | -1.07418     | 3 | CID  | 1.08E-04 | 0.84  | 3.23   | 0.55     | 467.7   | 1         | 21/56           |
|              | 4614                                          | K.ESTLHLVLR.L                      | 1067.62077 | 0.23376      | 2 | CID  | 3.93E-07 | 0.92  | 2.55   | 0.78     | 255.6   | 1         | 13/16           |
|              | 1606                                          | K.IQDKEGIPPDQQR.L                  | 1523.78125 | 0.91502      | 2 | CID  | 7.53E-10 | 0.97  | 3.99   | 0.69     | 828.2   | 1         | 20/24           |
|              | 4603                                          | R.LIFAGK#QLEDGR.T                  | 1460.78458 | 2.76980      | 2 | CID  | 2.52E-06 | 0.93  | 2.99   | 0.66     | 622.5   | 1         | 16/22           |
|              | 5609                                          | R.LIFAGK\$QLEDGR.T                 | 1389.74849 | 0.85602      | 2 | CID  | 1.23E-05 | 0.92  | 3.47   | 0.66     | 437.9   | 1         | 14/22           |
|              | 3888                                          | K.QLEDGRTLSDYNIQK.E                | 1779.88717 | -0.29406     | 2 | CID  | 1.30E-04 | 0.39  | 2.04   | 0.41     | 127.7   | 1         | 11/28           |
|              | 5947                                          | K.TITLEVEPSDTIEN@VK.A              | 1788.91132 | -4.37536     | 2 | CID  | 8.66E-04 | 0.74  | 3.20   | 0.26     | 455.6   | 1         | 14/30           |

|      |                                                                       |            |          |   |     |          |      |      |      |       |   |       |
|------|-----------------------------------------------------------------------|------------|----------|---|-----|----------|------|------|------|-------|---|-------|
| 6119 | K.TITLEVEPSDTIENVK.A                                                  | 1787.92730 | 0.95169  | 2 | CID | 1.80E-08 | 0.96 | 3.95 | 0.69 | 834.7 | 1 | 20/30 |
| 6238 | K.TITLEVEPSDTIENVK\$AK.I                                              | 2030.06519 | 0.80104  | 2 | CID | 3.60E-04 | 0.68 | 2.05 | 0.37 | 498.9 | 1 | 17/34 |
| 5547 | K.TITLEVEPSDTIENVK#AK.I <i>it is either this or the peptide below</i> | 2101.10128 | -0.40022 | 3 | CID | 7.23E-05 | 0.33 | 2.95 | 0.03 | 320.1 | 1 | 20/68 |
| 5547 | K.TITLEVEPSDTIENVKAK#.I                                               | 2101.10128 | -0.40022 | 3 | CID | 7.23E-05 | 0.35 | 2.97 | 0.01 | 320.1 | 1 | 20/68 |
| 2868 | R.TLSDYNIQK.E                                                         | 1081.55242 | -2.36982 | 2 | CID | 1.17E-05 | 0.93 | 2.61 | 0.69 | 493.8 | 1 | 14/16 |
| 6066 | R.TLSDYNIQKESTLHLVLR.L                                                | 2130.15534 | 0.29810  | 3 | CID | 7.04E-13 | 0.88 | 3.19 | 0.66 | 451.7 | 1 | 27/68 |
| 6861 | K.TLTGK\$TITILEVEPSDTIENVK.A                                          | 2331.22896 | 0.66559  | 2 | CID | 4.68E-03 | 0.16 | 2.35 | 0.20 | 140.4 | 1 | 9/40  |
| 6014 | K.TLTGK#TITILEVEPSDTIENVK.A                                           | 2402.26505 | 0.56459  | 2 | CID | 4.34E-05 | 0.80 | 3.64 | 0.04 | 803.8 | 1 | 19/40 |
| 5745 | F.VK#TLTGK\$TITILEVEPSDTIENVK.A                                       | 2671.45023 | -0.15849 | 3 | CID | 9.06E-06 | 0.74 | 4.38 | 0.63 | 517.6 | 1 | 26/88 |

| Reference     | #5                                    |            |              |   |      | P (pro)  | Sf    | Score  | Coverage | MW      | Accession | Peptide (Hits)  |
|---------------|---------------------------------------|------------|--------------|---|------|----------|-------|--------|----------|---------|-----------|-----------------|
| Scan(s)       | Peptide                               | MH+        | DeltaM (ppm) | z | Type | P (pep)  | Sf    | XC     | DeltaCn  | Sp      | RSp       | Ions            |
| 1 His-RFP-p53 |                                       |            |              |   |      | 2.66E-14 | 33.10 | 458.25 | 46.40    | 70829.9 |           | 46 (45 1 0 0 0) |
| 5311          | K.AYVKHPADIPDYLK.L                    | 1629.86352 | -1.92249     | 3 | CID  | 7.14E-04 | 0.70  | 2.41   | 0.46     | 568.2   | 1         | 19/52           |
| 1331          | K.DGGHYDAEVK.T                        | 1090.47998 | -0.06670     | 2 | CID  | 4.28E-03 | 0.77  | 2.16   | 0.55     | 399.8   | 1         | 11/18           |
| 5260          | R.ELNEALELK.D                         | 1058.57282 | -0.70602     | 2 | CID  | 9.32E-04 | 0.44  | 1.91   | 0.42     | 225.8   | 1         | 8/16            |
| 4435          | R.ELNEALELKDAQAGKEPGGSR.A             | 2212.12042 | -1.00212     | 3 | CID  | 1.11E-04 | 0.59  | 3.29   | 0.14     | 561.8   | 1         | 21/80           |
| 10615         | K.GGPLPFAWDILSPQFQYGSK.A              | 2208.11242 | 0.63429      | 2 | CID  | 2.74E-08 | 0.88  | 3.51   | 0.41     | 609.4   | 1         | 18/38           |
| 3318          | R.GTNFPSDGPVM*QK.K                    | 1393.64164 | 0.61864      | 2 | CID  | 1.20E-09 | 0.94  | 3.41   | 0.61     | 804.1   | 1         | 17/24           |
| 4425          | R.GTNFPSDGPVMQK.K                     | 1377.64673 | 0.30185      | 2 | CID  | 5.66E-07 | 0.90  | 3.10   | 0.61     | 471.0   | 1         | 15/24           |
| 3527          | R.GTNFPSDGPVM*QK\$K.T                 | 1564.74242 | 1.51980      | 2 | CID  | 1.91E-02 | 0.06  | 1.86   | 0.03     | 115.2   | 1         | 9/26            |
| 3499          | R.GTNFPSDGPVMQK.K.T                   | 1505.74169 | -0.41674     | 3 | CID  | 4.80E-02 | 0.45  | 2.75   | 0.43     | 158.6   | 1         | 13/52           |
| 5096          | K.HPADIPDYLK.L                        | 1168.59970 | -1.29025     | 2 | CID  | 9.79E-07 | 0.94  | 2.30   | 0.83     | 438.1   | 1         | 16/18           |
| 7186          | R.HSTGAENLYFQGLEEEEPQ.S               | 2048.91959 | 1.73423      | 2 | CID  | 9.19E-08 | 0.94  | 3.99   | 0.47     | 889.6   | 1         | 20/34           |
| 7095          | R.HSTGAENLYFQGLEEEEPQSDPS.V           | 2435.06335 | 1.27315      | 2 | CID  | 7.72E-07 | 0.90  | 3.32   | 0.63     | 623.3   | 1         | 17/42           |
| 9278          | R.HSTGAENLYFQGLEEEEPQSDPSVEPPLSQETF.S | 3562.61324 | 0.68830      | 3 | CID  | 1.70E-07 | 0.67  | 2.80   | 0.54     | 203.0   | 1         | 19/124          |
| 6779          | K.KKPLDGEYFTLQIR.G                    | 1707.94283 | -1.85116     | 3 | CID  | 1.87E-03 | 0.83  | 3.09   | 0.58     | 558.0   | 1         | 18/52           |
| 3419          | K.KPVQLPGAYK.T                        | 1100.64626 | 1.35966      | 2 | CID  | 5.25E-03 | 0.75  | 1.95   | 0.61     | 277.1   | 1         | 11/18           |
| 3627          | K.KPVQLPGAYKT.D                       | 1201.69393 | 1.08463      | 2 | CID  | 6.06E-02 | 0.62  | 2.26   | 0.61     | 168.4   | 1         | 9/20            |
| 2877          | K.KTMGWEASTER.M                       | 1295.60486 | -0.62533     | 2 | CID  | 1.02E-04 | 0.90  | 2.77   | 0.64     | 500.5   | 1         | 13/20           |
| 6186          | K.LDITSHNEDYTIQEQ.Y                   | 1776.82865 | 0.48718      | 2 | CID  | 4.52E-02 | 0.31  | 2.00   | 0.40     | 214.2   | 1         | 9/28            |
| 6863          | K.LDITSHNEDYTIQEQYER.A                | 2225.03568 | 2.52805      | 2 | CID  | 2.66E-14 | 0.97  | 4.99   | 0.59     | 1193.1  | 1         | 21/34           |
| 3695          | R.LGFLHSGTAK.S                        | 1030.56801 | -0.55840     | 2 | CID  | 6.24E-05 | 0.95  | 3.31   | 0.65     | 627.6   | 1         | 15/18           |
| 1350          | K.LKDGGHYDAEVK.T                      | 1331.65901 | 0.80808      | 2 | CID  | 1.30E-08 | 0.95  | 3.54   | 0.44     | 1328.2  | 1         | 17/22           |
| 4426          | K.LRGTNFPDGPVMQK.K                    | 1646.83190 | 0.84895      | 2 | CID  | 2.65E-05 | 0.74  | 3.06   | 0.48     | 256.5   | 1         | 12/28           |
| 3487          | K.LRGTNFPDGPVM*QK.K                   | 1662.82682 | 0.36700      | 3 | CID  | 6.18E-05 | 0.54  | 2.63   | 0.26     | 465.4   | 1         | 19/56           |
| 6603          | K.LSFPEGFK.W                          | 924.48254  | 0.90871      | 2 | CID  | 5.00E-02 | 0.71  | 2.02   | 0.47     | 356.5   | 1         | 9/14            |
| 7775          | K.LSFPEGFKWER.V                       | 1395.70556 | -1.53701     | 2 | CID  | 1.13E-06 | 0.47  | 2.26   | 0.31     | 181.1   | 1         | 10/20           |
| 5269          | R.MEGSVNGHEFEIEGEGEGRPYEGTQTAK.L      | 3038.34323 | 0.22136      | 3 | CID  | 2.66E-07 | 0.90  | 4.46   | 0.54     | 421.0   | 1         | 25/108          |
| 4862          | R.M*EGSVNGHEFEIEGEGEGRPYEGTQTAK.L     | 3054.33815 | -0.95256     | 3 | CID  | 7.22E-09 | 0.64  | 3.45   | 0.20     | 254.7   | 1         | 26/108          |
| 5467          | R.MEGSVN@GHEFEIEGEGEGRPYEGTQTAK.L     | 3039.32725 | 1.78529      | 3 | CID  | 1.52E-07 | 0.82  | 4.46   | 0.23     | 441.1   | 1         | 26/108          |
| 5105          | R.M*EGSVN@GHEFEIEGEGEGRPYEGTQTAK.L    | 3055.32216 | -0.59503     | 3 | CID  | 1.72E-08 | 0.83  | 3.70   | 0.41     | 459.2   | 1         | 29/108          |
| 4415          | K.PVQLPGAYK.T                         | 972.55129  | -0.85398     | 2 | CID  | 2.43E-04 | 0.82  | 1.96   | 0.57     | 512.9   | 1         | 11/16           |
| 5945          | T.QDSSLQDGEFIYK.V                     | 1529.71183 | -0.23254     | 2 | CID  | 3.49E-05 | 0.30  | 2.40   | 0.17     | 227.0   | 1         | 10/24           |
| 6809          | F.RE^LNEALELK#DAQ.A                   | 1656.85411 | 1.21611      | 2 | CID  | 8.24E-02 | 0.18  | 2.25   | 0.03     | 209.4   | 1         | 10/24           |
| 761           | R.RTEENLR.K                           | 1046.52251 | -0.70342     | 2 | CID  | 3.78E-06 | 0.91  | 3.07   | 0.57     | 421.9   | 1         | 11/14           |
| 5781          | D.SSLQDGEFIYK.V                       | 1286.62631 | 1.48672      | 2 | CID  | 3.66E-04 | 0.92  | 2.57   | 0.69     | 645.2   | 1         | 14/20           |



|                                                  |                                      |            |          |   |     |          |       |        |       |         |           |                 |
|--------------------------------------------------|--------------------------------------|------------|----------|---|-----|----------|-------|--------|-------|---------|-----------|-----------------|
| 3545                                             | K.SVCTCTYSPALNK.M                    | 1340.65151 | 0.10826  | 2 | CID | 3.52E-06 | 0.77  | 2.68   | 0.56  | 340.6   | 1         | 11/22           |
| 7599                                             | K.TCPVQLWVDSTPPPGTR.V                | 1910.94294 | 0.88069  | 2 | CID | 8.94E-10 | 0.85  | 3.40   | 0.61  | 306.7   | 1         | 13/32           |
| 7418                                             | K.TDIKLDITSHNEDYTIVEQYER.A           | 2682.28933 | 0.59034  | 4 | CID | 7.84E-05 | 0.74  | 3.17   | 0.42  | 439.9   | 1         | 26/126          |
| 2535                                             | K.TM*GWEASTER.M                      | 1183.50481 | -0.82966 | 2 | CID | 5.15E-04 | 0.92  | 2.61   | 0.62  | 768.7   | 1         | 13/18           |
| 3847                                             | K.TMGWEASTER.M                       | 1167.50990 | 0.86780  | 2 | CID | 4.10E-05 | 0.94  | 3.12   | 0.66  | 640.1   | 1         | 14/18           |
| 3096                                             | R.VEYLDDR.N                          | 909.43124  | 0.42835  | 2 | CID | 2.47E-05 | 0.90  | 1.84   | 0.66  | 468.3   | 1         | 11/12           |
| 9075                                             | R.VMNFEDGGVVTVDSSSLQDGEFIYK.V        | 2878.34513 | 1.50409  | 3 | CID | 2.02E-08 | 0.94  | 4.77   | 0.41  | 1038.7  | 1         | 30/100          |
| 8480                                             | R.VM*NFEDGGVVTVDSSSLQDGEFIYK.V       | 2894.34005 | 2.13965  | 2 | CID | 8.35E-06 | 0.62  | 3.19   | 0.13  | 418.1   | 1         | 17/50           |
| 4769                                             | K.VRM*EGSVN@GHEFEIEGEGEGRPYEGTQTAK.L | 3310.49169 | 2.33221  | 4 | CID | 2.47E-06 | 0.85  | 3.56   | 0.51  | 608.0   | 1         | 34/174          |
| 6292                                             | A.YVK#HPADIPDYLK.L                   | 1672.86831 | 2.93580  | 2 | CID | 6.24E-03 | 0.67  | 2.50   | 0.61  | 103.3   | 1         | 10/24           |
| 2 gj 51703339 sp P62988.1 UBIQ_HUMAN Ubiquitin   |                                      |            |          |   |     | 4.31E-10 | 13.45 | 220.26 | 89.50 | 8559.6  | 51703339  | 22 (22 0 0 0 0) |
| 1564                                             | K.AKIQDKEGIPPDQQR.L                  | 1722.91332 | 0.51997  | 3 | CID | 4.09E-03 | 0.57  | 2.55   | 0.52  | 237.3   | 1         | 15/56           |
| 5587                                             | K.ESTLHLVLR.L                        | 1067.62077 | 0.91979  | 2 | CID | 5.82E-08 | 0.92  | 2.77   | 0.84  | 202.1   | 1         | 12/16           |
| 2479                                             | K.IQDKEGIPPDQQR.L                    | 1523.78125 | 1.15535  | 2 | CID | 9.38E-10 | 0.95  | 3.69   | 0.70  | 638.7   | 1         | 18/24           |
| 2831                                             | K.IQDK\$EGIPPDQQR.L                  | 1566.78706 | 1.61879  | 2 | CID | 2.84E-01 | 0.36  | 2.34   | 0.28  | 164.6   | 1         | 10/24           |
| 1680                                             | K.IQD*K\$EGIPPDQQR.L                 | 1580.80271 | 1.27974  | 2 | CID | 9.84E-02 | 0.56  | 2.53   | 0.24  | 333.3   | 1         | 12/24           |
| 6553                                             | R.LIFAGK\$QLEDGR.T                   | 1389.74849 | -0.28585 | 2 | CID | 3.31E-08 | 0.97  | 3.97   | 0.72  | 975.7   | 1         | 18/22           |
| 5198                                             | R.LIFAGK\$QLE^DGR.T                  | 1403.76414 | -1.69216 | 2 | CID | 7.68E-04 | 0.48  | 2.39   | 0.07  | 321.7   | 1         | 13/22           |
| 5466                                             | R.LIFAGK#QLEDGR.T                    | 1460.78458 | 1.68346  | 2 | CID | 2.14E-08 | 0.96  | 3.70   | 0.64  | 1006.0  | 1         | 18/22           |
| 4954                                             | K.QLEDGRTLSDYNIQK.E                  | 1779.88717 | 0.48709  | 3 | CID | 2.51E-03 | 0.28  | 2.44   | 0.28  | 198.9   | 1         | 13/56           |
| 1537                                             | L.SDYNIQK.E                          | 867.42067  | -1.65537 | 2 | CID | 2.54E-02 | 0.80  | 2.15   | 0.49  | 312.4   | 1         | 9/12            |
| 5430                                             | E.STLHLVLR.L                         | 938.57818  | -2.41039 | 2 | CID | 2.02E-05 | 0.79  | 2.02   | 0.45  | 495.8   | 1         | 10/14           |
| 6991                                             | K.TITLEVEPSDTIENVK.A                 | 1787.92730 | 0.81515  | 2 | CID | 4.31E-10 | 0.96  | 3.84   | 0.64  | 880.3   | 1         | 21/30           |
| 6953                                             | K.TITLEVEPSDTIE^NVK\$.A              | 1844.94877 | 1.59389  | 2 | CID | 1.84E-01 | 0.20  | 2.35   | 0.15  | 191.9   | 1         | 10/30           |
| 7229                                             | K.TITLEVEPSDTIENVK\$AK.I             | 2030.06519 | 1.70301  | 2 | CID | 5.95E-04 | 0.56  | 3.01   | 0.12  | 347.4   | 1         | 15/34           |
| 6358                                             | K.TITLEVEPSDTIE^NVK\$AK.I            | 2044.08084 | -0.35792 | 3 | CID | 1.50E-01 | 0.18  | 2.54   | 0.01  | 196.1   | 1         | 18/68           |
| 3385                                             | R.TLSDYNIQK.E                        | 1081.55242 | 0.11322  | 2 | CID | 2.68E-06 | 0.93  | 2.56   | 0.69  | 467.5   | 1         | 14/16           |
| 6753                                             | R.TLSDYNIQK\$ESTL.H                  | 1554.76460 | 1.79211  | 2 | CID | 2.89E-02 | 0.21  | 2.17   | 0.11  | 233.2   | 1         | 10/24           |
| 7204                                             | R.TLSDYNIQK#ESTLHLVLR.L              | 2244.19724 | 1.03115  | 3 | CID | 3.86E-02 | 0.20  | 2.48   | 0.05  | 151.3   | 1         | 18/68           |
| 7012                                             | K.TLTGK#TITLEVEPSDTIENVK.A           | 2402.26505 | 5.13791  | 2 | CID | 4.14E-08 | 0.96  | 5.18   | 0.57  | 936.8   | 1         | 20/40           |
| 7925                                             | K.TLTGK\$TITLEVEPSDTIENVK.A          | 2331.22896 | 0.87504  | 2 | CID | 1.36E-01 | 0.08  | 1.85   | 0.21  | 116.4   | 1         | 8/40            |
| 7182                                             | K.TLTGK#TITLEVEPSDTIENVK\$AK.I       | 2644.40294 | 1.10248  | 3 | CID | 2.74E-06 | 0.76  | 4.02   | 0.04  | 751.4   | 1         | 26/88           |
| 6665                                             | F.VK#TLTGK\$TITLEVEPSDTIENVK.A       | 2671.45023 | 2.24047  | 3 | CID | 2.13E-07 | 0.74  | 3.63   | 0.07  | 689.1   | 1         | 29/88           |
| 3 gj 260080636 gb ACX31156.1 MDM2 [Homo sapiens] |                                      |            |          |   |     | 8.99E-14 | 4.13  | 78.27  | 23.40 | 52436.5 | 260080636 | 9 (6 1 1 1 0)   |
| 3149                                             | R.AISETENSDELSEGER.Q                 | 1765.77226 | 0.55720  | 2 | CID | 1.53E-09 | 0.98  | 3.77   | 0.58  | 2173.8  | 1         | 23/30           |
| 5990                                             | K.DLVQELQEEKPSSSHLVRPSTSSR.R         | 2796.41224 | 1.99538  | 3 | CID | 2.54E-11 | 0.52  | 2.63   | 0.21  | 474.2   | 1         | 23/96           |
| 4121                                             | R.NLVVVNQESSDSGTSVSENR.C             | 2249.06402 | 4.88043  | 2 | CID | 8.99E-14 | 0.98  | 5.32   | 0.48  | 2217.8  | 1         | 26/40           |

2743

R.RAISETEENSDELSEGER.Q

1921.87337

2.33476 2 CID

1.34E-03 0.90

3.26

0.63 471.3

1

17/32
