# Supplementary material
Source: PubMed Central journal article supplement (PMC3243545)
Supplement: supp_M111.234559_FigureS10.pdf [file supp_M111.234559_FigureS10.pdf]

| Reference | S7-E2B-20       |            |              |   | P (pro)  | Sf    | Score  | Coverage | MW      | Acsn | Peptide (Hits)  |
|-----------|-----------------|------------|--------------|---|----------|-------|--------|----------|---------|------|-----------------|
| Scan(s)   | Peptide         | MH+        | DeltaM (ppm) | z | P (pep)  | Sf    | XC     | DeltaCn  | Sp      | RSp  | Ions            |
| 1 RFP_UB  |                 |            |              |   | 8.98E-15 | 69.49 | 826.30 | 83.10    | 38172.1 |      | 83 (81 2 0 0 0) |
| 1549      | K.LDITSHN.E     | 799.39446  | -0.38356     | 2 | 2.73E-03 | 0.83  | 2.54   | 0.65     | 375.4   | 1    | 11/18           |
| 1005      | D.GALKGEIK.M    | 815.49853  | -0.08418     | 2 | 2.67E-03 | 0.69  | 3.09   | -        | 670.9   | 1    | 14/21           |
| 3449      | S.TLHLVLR.L     | 851.54615  | 0.76601      | 2 | 9.38E-06 | 0.59  | 2.41   | -        | 367.0   | 1    | 14/18           |
| 1003      | G.HYDAEVK.T     | 861.41011  | -0.52675     | 2 | 5.10E-02 | 0.80  | 2.53   | 0.61     | 293.1   | 1    | 11/18           |
| 448       | K.GEIK#M*R.L    | 863.44034  | -0.33643     | 2 | 9.17E-03 | 0.72  | 2.01   | 0.46     | 387.2   | 1    | 10/15           |
| 1289      | L.SDYNIQK.E     | 867.42067  | -0.74064     | 2 | 1.96E-03 | 0.81  | 2.74   | 0.53     | 365.4   | 1    | 11/18           |
| 991       | G.GHYDAEVK.T    | 918.43157  | -0.80383     | 2 | 3.21E-02 | 0.83  | 2.93   | 0.54     | 327.9   | 1    | 13/21           |
| 6036      | K.LSFPEGFK.W    | 924.48254  | -1.00590     | 2 | 1.35E-04 | 0.84  | 2.53   | 0.81     | 339.4   | 1    | 11/21           |
| 1696      | M.GWEASTER.M    | 935.42174  | -0.58307     | 2 | 6.23E-03 | 0.80  | 2.32   | 0.76     | 321.5   | 1    | 11/21           |
| 3446      | E.STLHLVLR.L    | 938.57818  | -1.17483     | 2 | 4.97E-05 | 0.64  | 2.85   | -        | 606.2   | 1    | 14/21           |
| 2179      | K.PVQLPGAYK.T   | 972.55129  | -0.54019     | 2 | 1.29E-06 | 0.93  | 3.15   | 0.57     | 835.6   | 1    | 17/24           |
| 2138      | F.PSDGPM*QK.K   | 974.46116  | 0.38118      | 2 | 8.18E-04 | 0.80  | 2.85   | 0.67     | 242.9   | 1    | 12/24           |
| 2281      | T.LSDYNIQK.E    | 980.50474  | -0.42514     | 2 | 2.91E-04 | 0.93  | 3.36   | 0.70     | 638.4   | 1    | 14/21           |
| 891       | H.HASEDVIK.E    | 985.49490  | -1.09438     | 2 | 7.92E-05 | 0.92  | 3.13   | 0.79     | 434.4   | 1    | 15/24           |
| 548       | R.PYEGTQTAK.L   | 994.48400  | -1.41775     | 2 | 4.37E-05 | 0.93  | 3.19   | 0.74     | 621.9   | 1    | 16/24           |
| 2391      | R.MYPEDGALK.G   | 1023.48156 | -0.66059     | 2 | 2.21E-06 | 0.91  | 2.68   | 0.71     | 515.6   | 1    | 17/24           |
| 3146      | H.PADIPDYLK.L   | 1031.54079 | -1.74499     | 2 | 1.31E-03 | 0.83  | 2.97   | 0.62     | 452.8   | 1    | 12/24           |
| 2260      | Y.TIVEQYER.A    | 1037.52620 | -1.08780     | 2 | 4.38E-01 | 0.59  | 2.38   | 0.39     | 296.1   | 1    | 11/21           |
| 2127      | R.M*YPEDGALK.G  | 1039.47648 | -0.10843     | 2 | 1.70E-02 | 0.84  | 2.36   | 0.60     | 391.7   | 1    | 16/24           |
| 4455      | K.ESTLHLVLR.L   | 1067.62077 | -1.02397     | 2 | 1.54E-08 | 0.65  | 3.20   | -        | 367.6   | 1    | 16/24           |
| 4958      | R.TLSDYNIQK.E   | 1081.55242 | -1.35403     | 2 | 3.30E-07 | 0.94  | 3.36   | 0.81     | 478.4   | 1    | 17/24           |
| 1941      | T.M*GWEASTER.M  | 1082.45714 | -0.73333     | 2 | 8.98E-05 | 0.90  | 2.30   | 0.88     | 498.7   | 1    | 15/24           |
| 1314      | K.DGGHYDAEVK.T  | 1090.47998 | -0.51447     | 2 | 8.40E-06 | 0.91  | 2.93   | 0.75     | 520.4   | 1    | 17/27           |
| 3957      | K.KPVQLPGAYK.T  | 1100.64626 | -0.08215     | 2 | 4.46E-05 | 0.84  | 3.43   | 0.57     | 268.2   | 1    | 14/27           |
| 2111      | N.FPSDGPVM*QK.K | 1121.52958 | -1.83985     | 2 | 1.61E-04 | 0.84  | 3.02   | 0.72     | 320.3   | 1    | 13/27           |
| 489       | G.RPYEGTQTAK.L  | 1150.58511 | -1.57567     | 2 | 1.29E-05 | 0.84  | 2.74   | 0.46     | 380.2   | 1    | 18/27           |
| 2564      | Y.PEDGALKGEIK.M | 1156.62083 | -0.57451     | 2 | 1.97E-04 | 0.91  | 4.00   | 0.46     | 679.2   | 1    | 17/30           |
| 2744      | K.TMGWEASTER.M  | 1167.50990 | -0.80509     | 2 | 1.62E-07 | 0.96  | 3.88   | 0.84     | 762.2   | 1    | 18/27           |
| 4124      | K.HPADIPDYLK.L  | 1168.59970 | -0.35012     | 2 | 3.34E-07 | 0.90  | 2.95   | 0.92     | 218.8   | 1    | 15/27           |
| 1913      | K.TM*GWEASTER.M | 1183.50482 | -0.21503     | 2 | 1.94E-08 | 0.96  | 3.29   | 0.86     | 949.7   | 1    | 18/27           |
| 3669      | S.SLQDGEFIYK.V  | 1199.59428 | -0.19876     | 2 | 1.25E-05 | 0.89  | 2.84   | 0.71     | 570.3   | 1    | 15/27           |
| 3075      | D.YTIVEQYER.A   | 1200.58953 | -1.73183     | 2 | 4.04E-06 | 0.92  | 3.33   | 0.59     | 677.3   | 1    | 16/24           |
| 2309      | K.K#PVQLPGAYK.T | 1214.68916 | -1.82675     | 2 | 1.10E-05 | 0.95  | 3.67   | 0.00     | 966.9   | 1    | 18/27           |
| 1102      | L.KDGGHYDAEVK.T | 1218.57494 | -1.15529     | 2 | 1.29E-08 | 0.94  | 3.34   | 0.69     | 883.9   | 1    | 18/30           |

|      |                            |            |          |   |          |      |      |      |        |   |        |
|------|----------------------------|------------|----------|---|----------|------|------|------|--------|---|--------|
| 3387 | I.FAGK#QLEDGR.T            | 1234.61745 | -0.46891 | 2 | 1.43E-04 | 0.83 | 3.56 | 0.23 | 705.8  | 1 | 15/27  |
| 3913 | R.LIFAGK#QLED.G            | 1247.66300 | 0.10623  | 2 | 3.16E-05 | 0.79 | 2.99 | 0.22 | 692.4  | 1 | 16/27  |
| 3567 | D.SSLQDGEFIYK.V            | 1286.62631 | -0.12618 | 2 | 2.87E-08 | 0.94 | 3.54 | 0.60 | 1050.8 | 1 | 18/30  |
| 2094 | K.KTMGWEASTER.M            | 1295.60486 | -0.90799 | 2 | 1.23E-07 | 0.95 | 3.93 | 0.75 | 692.8  | 1 | 18/30  |
| 1910 | L.SSSEHM*QIFVK.T           | 1308.62527 | 0.01803  | 2 | 1.70E-04 | 0.89 | 2.94 | 0.77 | 359.9  | 1 | 16/30  |
| 1502 | K.KTM*GWEASTER.M           | 1311.59978 | 0.74254  | 2 | 1.60E-05 | 0.93 | 3.94 | 0.75 | 319.9  | 1 | 17/30  |
| 1178 | K.LKDGGHYDAEVK.T           | 1331.65901 | 0.25807  | 2 | 4.60E-08 | 0.97 | 4.11 | 0.67 | 1346.5 | 1 | 21/33  |
| 1377 | R.PYEGTQTAK#LK.V           | 1349.70593 | -0.69514 | 3 | 1.22E-01 | 0.42 | 3.43 | 0.05 | 223.0  | 1 | 21/60  |
| 2687 | R.GTNFSPDGPVMMQK.K         | 1377.64673 | 0.83349  | 2 | 3.57E-09 | 0.94 | 4.21 | 0.64 | 592.9  | 1 | 19/36  |
| 2306 | R.GTNFSPDGPVM*QK.K         | 1393.64165 | -0.26085 | 2 | 1.87E-08 | 0.96 | 4.70 | 0.79 | 657.9  | 1 | 19/36  |
| 3605 | N.EDYTIVEQYER.A            | 1444.65907 | -0.81732 | 2 | 7.10E-09 | 0.94 | 3.33 | 0.93 | 594.2  | 1 | 16/30  |
| 1216 | K.LJKDGGHYDAEVK.T          | 1445.70191 | -1.06572 | 2 | 2.49E-04 | 0.72 | 3.87 | 0.01 | 648.1  | 1 | 16/33  |
| 1216 | K.LK#DGGHYDAEVK.T          | 1445.70191 | -1.06572 | 2 | 1.83E-05 | 0.70 | 3.83 | 0.57 | 648.1  | 1 | 16/33  |
| 2991 | R.MYPEDGALKGEIK.M          | 1450.72464 | -0.49484 | 2 | 8.67E-07 | 0.83 | 3.11 | 0.51 | 355.9  | 1 | 19/36  |
| 2683 | R.HSTGAENLYFQGH.M          | 1460.65532 | -0.41531 | 2 | 2.04E-10 | 0.97 | 5.16 | 0.87 | 602.9  | 1 | 20/36  |
| 3444 | R.LIFAGK#QLEDGR.T          | 1460.78558 | -0.42171 | 2 | 3.97E-08 | 0.93 | 4.23 | 0.35 | 920.9  | 1 | 20/33  |
| 2568 | R.M*YPEDGALKGEIK.M         | 1466.71956 | 3.39020  | 2 | 1.47E-04 | 0.94 | 3.53 | 0.75 | 713.2  | 1 | 21/36  |
| 1362 | K.IQDKEGIPDQQR.L           | 1523.78125 | -0.20652 | 2 | 1.50E-08 | 0.94 | 4.39 | 0.52 | 571.1  | 1 | 21/36  |
| 3637 | T.QDSSLQDGEFIYK.V          | 1529.71183 | 0.00686  | 2 | 9.46E-07 | 0.85 | 3.17 | 0.79 | 260.3  | 1 | 14/36  |
| 3673 | N.EJDYTIVEQYER.A           | 1558.70197 | 0.46132  | 2 | 1.25E-09 | 0.98 | 4.19 | 0.00 | 1980.3 | 1 | 23/30  |
| 2699 | R.HSTGAENLYFQGHM*.C        | 1607.69072 | 0.75897  | 2 | 9.90E-10 | 0.95 | 4.50 | 0.87 | 404.0  | 1 | 18/39  |
| 2650 | K.KPVQLPGAYK#TDIK.L        | 1671.94280 | -1.32702 | 3 | 2.21E-05 | 0.77 | 4.14 | 0.16 | 498.3  | 1 | 28/78  |
| 3711 | T.VTQDSSLQDGEFIYK.V        | 1729.82792 | -0.27822 | 2 | 8.23E-10 | 0.95 | 3.97 | 0.77 | 1022.2 | 1 | 20/42  |
| 3313 | K.AYVK#HPADIPDYLK.L        | 1743.90642 | -1.61735 | 3 | 2.15E-03 | 0.72 | 3.62 | 0.30 | 394.7  | 1 | 24/78  |
| 3678 | K.LDITSHNEDYTIVEQ.Y        | 1776.82865 | -0.47464 | 2 | 5.76E-03 | 0.69 | 2.23 | 0.62 | 364.2  | 1 | 16/42  |
| 3336 | T.SHNEDYTIVEQYER.A         | 1782.79293 | 0.66302  | 2 | 8.68E-12 | 0.97 | 4.32 | 0.81 | 1668.6 | 1 | 21/39  |
| 4173 | K.TITLEVEPSDTIENVK.A       | 1787.92730 | 3.75096  | 2 | 2.16E-06 | 0.94 | 3.99 | 0.65 | 724.7  | 1 | 24/45  |
| 2414 | K.TTYM*AK#KPVQLPGAYK.T     | 1926.01532 | -0.64942 | 3 | 4.31E-05 | 0.47 | 2.63 | 0.20 | 488.2  | 1 | 25/90  |
| 1631 | F.EIEGEGEGRPYEGTQTAK.L     | 1950.90394 | -2.33367 | 3 | 8.39E-02 | 0.66 | 2.72 | 0.71 | 181.9  | 1 | 18/102 |
| 3165 | R.MEGSVNGHEFEIEGEGEGR.P    | 2062.87707 | -1.10685 | 3 | 9.42E-11 | 0.97 | 5.38 | 0.80 | 1103.3 | 1 | 35/108 |
| 2864 | R.M*EGSVNGHEFEIEGEGEGR.P   | 2078.87199 | -0.88604 | 3 | 1.31E-14 | 0.97 | 5.23 | 0.82 | 1325.6 | 1 | 34/108 |
| 4281 | G.GVVTVTQDSSLQDGEFIYK.V    | 2086.03389 | -2.29675 | 2 | 3.33E-12 | 0.97 | 4.34 | 0.77 | 1433.8 | 1 | 24/54  |
| 3742 | K.TITLEVEPSDTIENVK#AK.I    | 2101.10228 | 0.60534  | 3 | 5.25E-04 | 0.29 | 3.14 | 0.02 | 264.4  | 1 | 22/102 |
| 4077 | K.LDITSHNEDYTIVEQYER.A     | 2225.03568 | 0.44329  | 2 | 8.98E-15 | 0.97 | 4.80 | 0.71 | 1321.1 | 1 | 24/51  |
| 2992 | H.EFEIEGEGEGRPYEGTQTAK.L   | 2227.01495 | 0.15538  | 3 | 3.66E-04 | 0.74 | 2.63 | 0.78 | 243.2  | 1 | 21/114 |
| 4034 | K.TLTGK#TITLEVEPSDTIENVK.A | 2402.26605 | 1.38768  | 3 | 4.77E-11 | 0.94 | 5.94 | 0.05 | 1502.5 | 1 | 42/120 |
| 2698 | N.GHEFEIEGEGEGRPYEGTQTAK.L | 2421.09532 | 0.09569  | 3 | 2.50E-07 | 0.93 | 4.12 | 0.89 | 429.0  | 1 | 29/126 |

|      |                                   |            |          |   |          |      |      |      |       |   |        |
|------|-----------------------------------|------------|----------|---|----------|------|------|------|-------|---|--------|
| 3183 | R.MEGSVNGHEFEIEGEGEGRPYEGTQTAK.L  | 3038.34323 | 1.26152  | 4 | 1.10E-08 | 0.96 | 5.35 | -    | 658.5 | 1 | 44/243 |
| 3033 | R.M*EGSVNGHEFEIEGEGEGRPYEGTQTAK.L | 3054.33815 | 0.36029  | 4 | 2.02E-07 | 0.93 | 4.59 | 0.88 | 479.5 | 1 | 37/243 |
| 5869 | H.MCELEELNVPGEIVESLSSEHM*QIFVK.T  | 3250.53167 | -0.62560 | 3 | 3.49E-05 | 0.77 | 3.01 | 0.63 | 273.2 | 1 | 27/162 |

| Reference    | S8-E2B-40          |            |              |   | P (pro)  | Sf    | Score  | Coverage | MW      | Accession | Peptide (Hits)  |
|--------------|--------------------|------------|--------------|---|----------|-------|--------|----------|---------|-----------|-----------------|
| Scan(s)      | Peptide            | MH+        | DeltaM (ppm) | z | P (pep)  | Sf    | XC     | DeltaCn  | Sp      | RSp       | Ions            |
| 1 RFP_UB_new |                    |            |              |   | 1.10E-10 | 42.32 | 484.30 | 73.59    | 38172.1 |           | 49 (46 3 0 0 0) |
| 3503         | S.TLHLVLR.L        | 851.54615  | -1.59929     | 2 | 1.83E-05 | 0.59  | 2.38   | -        | 385.6   | 1         | 14/18           |
| 4438         | K.LSFPEGFK.W       | 924.48254  | -1.99621     | 2 | 3.64E-06 | 0.59  | 2.08   | -        | 588.8   | 1         | 16/21           |
| 3506         | E.STLHLVLR.L       | 938.57818  | -1.17483     | 2 | 4.34E-06 | 0.67  | 2.93   | -        | 665.2   | 1         | 14/21           |
| 2290         | T.LSDYNIQK.E       | 980.50474  | -2.35485     | 2 | 7.29E-06 | 0.88  | 2.97   | 0.65     | 404.2   | 1         | 13/21           |
| 602          | H.HASSEDVIK.E      | 985.49490  | -1.96145     | 2 | 3.40E-06 | 0.92  | 3.06   | 0.81     | 473.4   | 1         | 15/24           |
| 3151         | H.PADIPDYLK.L      | 1031.54079 | -1.03496     | 2 | 3.24E-06 | 0.91  | 2.94   | 0.65     | 710.3   | 1         | 15/24           |
| 3684         | K.ESTLHLVLR.L      | 1067.62077 | -2.51037     | 2 | 3.30E-09 | 0.41  | 2.86   | -        | 202.8   | 1         | 14/24           |
| 6361         | R.TLSDYNIQK.E      | 1081.55242 | -2.03123     | 2 | 1.29E-07 | 0.90  | 2.48   | 0.85     | 385.7   | 1         | 15/24           |
| 922          | K.DGGHYDAEVK.T     | 1090.47998 | -0.73835     | 2 | 3.95E-08 | 0.92  | 2.75   | 0.70     | 806.6   | 1         | 18/27           |
| 6338         | K.KPVQLPGAYK.T     | 1100.64626 | -1.63486     | 2 | 3.70E-07 | 0.84  | 2.95   | 0.61     | 319.4   | 1         | 15/27           |
| 3726         | H.PJADIPDYLK.L     | 1145.58369 | -1.51126     | 2 | 8.30E-06 | 0.82  | 3.12   | 0.47     | 410.4   | 1         | 13/24           |
| 4125         | K.HPADIPDYLK.L     | 1168.59970 | -1.60363     | 2 | 1.81E-10 | 0.84  | 2.53   | 0.91     | 187.4   | 1         | 13/27           |
| 2097         | K.TM*GWEASTER.M    | 1183.50482 | -1.24646     | 2 | 4.47E-09 | 0.96  | 3.17   | 0.94     | 984.7   | 1         | 19/27           |
| 3628         | S.SLQDGEFIYK.V     | 1199.59428 | -2.74276     | 2 | 5.24E-07 | 0.89  | 3.12   | 0.66     | 508.9   | 1         | 15/27           |
| 3073         | D.YTIVEQYER.A      | 1200.58953 | -1.02010     | 2 | 1.11E-07 | 0.95  | 3.64   | 0.65     | 830.8   | 1         | 17/24           |
| 3362         | I.FAGK#QLEDGR.T    | 1234.61745 | 0.12432      | 2 | 1.68E-06 | 0.70  | 3.35   | 0.08     | 599.2   | 1         | 15/27           |
| 2094         | G.RTLSDYNIQK.E     | 1237.65353 | -0.52257     | 2 | 2.19E-06 | 0.90  | 3.52   | 0.67     | 471.6   | 1         | 14/27           |
| 3529         | D.SSLQDGEFIYK.V    | 1286.62631 | -1.45445     | 2 | 2.82E-06 | 0.95  | 3.06   | 0.89     | 997.6   | 1         | 17/30           |
| 2109         | K.KTMGWEASTER.M    | 1295.60486 | -1.66174     | 2 | 4.17E-07 | 0.93  | 3.57   | 0.76     | 594.5   | 1         | 16/30           |
| 1556         | K.KTM*GWEASTER.M   | 1311.59978 | -1.21192     | 2 | 5.23E-06 | 0.92  | 3.43   | 0.78     | 317.1   | 1         | 17/30           |
| 816          | K.LKDGGHYDAEVK.T   | 1331.65901 | -0.93361     | 2 | 9.41E-10 | 0.94  | 3.53   | 0.75     | 834.7   | 1         | 19/33           |
| 2741         | R.GTNFSPDGPVMQK.K  | 1377.64673 | -0.31841     | 2 | 5.02E-10 | 0.93  | 3.64   | 0.66     | 605.4   | 1         | 20/36           |
| 5727         | R.GTNFSPDGPVM*QK.K | 1393.64165 | -1.57472     | 2 | 1.12E-10 | 0.92  | 3.16   | 0.75     | 674.3   | 1         | 19/36           |
| 3578         | N.EDYTIVEQYER.A    | 1444.65907 | -1.83129     | 2 | 9.37E-08 | 0.93  | 2.86   | 0.78     | 750.6   | 1         | 18/30           |
| 1304         | K.LK#DGGHYDAEVK.T  | 1445.70191 | -2.50114     | 2 | 1.24E-05 | 0.74  | 3.86   | 0.00     | 674.6   | 1         | 17/33           |
| 2938         | R.MYPEDGALKGEIK.M  | 1450.72464 | -1.25214     | 2 | 2.33E-10 | 0.88  | 2.92   | 0.69     | 381.3   | 1         | 20/36           |
| 2791         | R.HSTGAENLYFQGH.M  | 1460.65532 | -0.83318     | 2 | 1.32E-08 | 0.93  | 3.55   | 0.76     | 556.0   | 1         | 19/36           |
| 3358         | R.LIFAGK#QLEDGR.T  | 1460.78558 | -0.50527     | 2 | 1.45E-07 | 0.94  | 4.25   | 0.37     | 961.1   | 1         | 21/33           |
| 2843         | R.M*YPEDGALKGEIK.M | 1466.71956 | -1.68663     | 2 | 4.85E-06 | 0.91  | 3.33   | 0.76     | 493.2   | 1         | 18/36           |

|      |                                   |            |          |   |          |      |      |      |        |   |        |
|------|-----------------------------------|------------|----------|---|----------|------|------|------|--------|---|--------|
| 1617 | K.IQDKEGIPDQQR.L                  | 1523.78125 | -1.00762 | 2 | 5.26E-10 | 0.94 | 4.03 | 0.61 | 604.2  | 1 | 21/36  |
| 3603 | T.QDSSLQDGEFIYK.V                 | 1529.71183 | -1.90833 | 2 | 1.28E-05 | 0.84 | 2.98 | 0.77 | 268.6  | 1 | 15/36  |
| 3640 | H.NEDYTIVEQYER.A                  | 1558.70199 | -0.96596 | 2 | 3.41E-09 | 0.97 | 3.93 | 0.89 | 1511.5 | 2 | 22/33  |
| 2711 | R.HSTGAENLYFQGHM*.C               | 1607.69072 | -1.29112 | 2 | 6.60E-09 | 0.91 | 3.24 | 0.90 | 387.3  | 1 | 17/39  |
| 2331 | K.LRGTNFSPDGPVM*QK.K              | 1662.82682 | -1.17764 | 3 | 4.55E-07 | 0.95 | 3.65 | 0.92 | 816.1  | 1 | 33/84  |
| 3675 | T.VTQDSSLQDGEFIYK.V               | 1729.82792 | -1.68958 | 2 | 3.36E-10 | 0.89 | 2.69 | 0.56 | 1086.8 | 1 | 20/42  |
| 3282 | K.AYVK#HPADIPDYLK.L               | 1743.90642 | -1.72235 | 3 | 8.55E-08 | 0.80 | 3.96 | 0.38 | 370.4  | 1 | 24/78  |
| 6147 | K.TITLEVEPSDTIENVK.A              | 1787.92730 | -1.02827 | 2 | 2.25E-10 | 0.88 | 3.70 | 0.55 | 515.5  | 1 | 19/45  |
| 2425 | K.TTYM*AK#KPVQLPGAYK.T            | 1926.01532 | -1.12477 | 3 | 1.24E-07 | 0.58 | 2.76 | 0.35 | 432.5  | 1 | 24/90  |
| 3167 | R.MEGSVNGHEFEIEGEGEGR.P           | 2062.87707 | -1.99447 | 3 | 1.66E-08 | 0.96 | 5.34 | 0.69 | 857.2  | 1 | 33/108 |
| 2886 | R.M*EGSVNGHEFEIEGEGEGR.P          | 2078.87199 | -0.40982 | 2 | 8.55E-10 | 0.88 | 2.76 | 0.87 | 423.4  | 1 | 21/54  |
| 4055 | K.LDITSHNEDYTIVEQYER.A            | 2225.03568 | -1.53779 | 3 | 2.93E-08 | 0.91 | 4.06 | 0.76 | 548.3  | 1 | 24/102 |
| 3982 | K.TLTGKTITLEVEPSDTIENVK.A         | 2288.22315 | -2.60092 | 3 | 2.52E-06 | 0.94 | 4.99 | 0.60 | 825.3  | 1 | 32/120 |
| 3990 | K.TLTGK#TITLEVEPSDTIENVK.A        | 2402.26605 | -1.66120 | 3 | 4.13E-09 | 0.94 | 5.91 | 0.62 | 1505.1 | 2 | 41/120 |
| 4718 | R.VM*NFEDEGGVVTVTQDSSLQDGEFIYK.V  | 2894.34005 | 0.95701  | 2 | 1.10E-10 | 0.81 | 2.56 | 0.77 | 371.6  | 1 | 20/75  |
| 2952 | R.M*EGSVNGHEFEIEGEGEGRPYEGTQTAK.L | 3054.33815 | -0.71440 | 3 | 3.85E-07 | 0.89 | 4.04 | 0.84 | 208.6  | 1 | 27/162 |

| Reference | S9-E2B-80      |            |              |   | P (pro)  | Sf    | Score  | Coverage | MW      | Accession | Peptide (Hits)  |
|-----------|----------------|------------|--------------|---|----------|-------|--------|----------|---------|-----------|-----------------|
| Scan(s)   | Peptide        | MH+        | DeltaM (ppm) | z | P (pep)  | Sf    | XC     | DeltaCn  | Sp      | RSp       | Ions            |
| 1         | RFP_UB_new     |            |              |   | 1.05E-13 | 48.89 | 614.30 | 74.18    | 38172.1 |           | 62 (59 3 0 0 0) |
| 1645      | K.LDITSHN.E    | 799.39446  | -0.99437     | 2 | 1.38E-03 | 0.81  | 2.42   | 0.64     | 329.1   | 1         | 11/18           |
| 3555      | S.TLHLVLR.L    | 851.54615  | -1.38426     | 2 | 1.50E-05 | 0.61  | 2.48   | -        | 378.7   | 1         | 14/18           |
| 1324      | L.SDYNIQK.E    | 867.42067  | -1.86646     | 2 | 1.24E-01 | 0.77  | 2.44   | 0.54     | 307.2   | 1         | 11/18           |
| 2666      | P.VQLPGAYK.T   | 875.49853  | -1.68185     | 2 | 7.67E-04 | 0.80  | 2.29   | 0.84     | 231.2   | 1         | 11/21           |
| 548       | G.GHYDAEVK.T   | 918.43157  | -2.33232     | 2 | 5.81E-03 | 0.90  | 3.17   | 0.53     | 470.2   | 1         | 15/21           |
| 6568      | K.LSFPEGFK.W   | 924.48254  | -1.26998     | 2 | 7.40E-04 | 0.84  | 2.36   | 0.99     | 254.3   | 1         | 10/21           |
| 3640      | P.ADIPDYLK.L   | 934.48802  | -1.76406     | 2 | 1.60E-07 | 0.50  | 2.61   | -        | 342.1   | 1         | 14/21           |
| 3558      | E.STLHLVLR.L   | 938.57818  | -2.41039     | 2 | 2.19E-05 | 0.76  | 3.21   | -        | 674.5   | 1         | 15/21           |
| 2940      | K.PVQLPGAYK.T  | 972.55129  | -2.79947     | 2 | 1.90E-04 | 0.84  | 2.66   | 0.59     | 521.5   | 1         | 14/24           |
| 2405      | T.LSDYNIQK.E   | 980.50474  | -2.60385     | 2 | 3.38E-05 | 0.88  | 2.68   | 0.67     | 380.4   | 1         | 14/21           |
| 577       | R.PYEGTQTAK.L  | 994.48400  | -2.33836     | 2 | 4.62E-06 | 0.91  | 3.37   | 0.54     | 523.3   | 1         | 16/24           |
| 2419      | R.MYPEDGALK.G  | 1023.48156 | -1.73402     | 2 | 2.24E-02 | 0.36  | 2.36   | 0.42     | 192.7   | 1         | 9/24            |
| 3271      | H.PADIPDYLK.L  | 1031.54079 | -2.10000     | 2 | 4.66E-04 | 0.84  | 2.64   | 0.64     | 523.6   | 1         | 13/24           |
| 2119      | R.M*YPEDGALK.G | 1039.47648 | -1.98738     | 2 | 2.24E-03 | 0.84  | 2.33   | 0.68     | 370.2   | 1         | 15/24           |
| 3818      | K.ESTLHLVLR.L  | 1067.62077 | -1.82434     | 2 | 1.62E-08 | 0.47  | 3.10   | -        | 195.6   | 1         | 14/24           |
| 2911      | R.TLSDYNIQK.E  | 1081.55242 | -2.48269     | 2 | 2.03E-04 | 0.92  | 3.03   | 0.90     | 304.7   | 1         | 14/24           |
| 583       | K.DGGHYDAEVK.T | 1090.47998 | -2.19360     | 2 | 1.72E-05 | 0.87  | 3.07   | 0.73     | 343.2   | 1         | 14/27           |

|      |                                   |            |          |   |          |      |      |      |        |   |        |
|------|-----------------------------------|------------|----------|---|----------|------|------|------|--------|---|--------|
| 3742 | K.KPVQLPGAYK.T                    | 1100.64626 | -0.96941 | 2 | 1.30E-04 | 0.81 | 3.43 | 0.64 | 191.5  | 1 | 12/27  |
| 2247 | N.FPSDGPVM*QK.K                   | 1121.52958 | -2.92828 | 2 | 3.13E-03 | 0.65 | 2.54 | 0.50 | 215.0  | 1 | 13/27  |
| 2768 | K.TMGWEASTER.M                    | 1167.50990 | -1.43243 | 2 | 1.41E-02 | 0.92 | 3.80 | 0.48 | 758.2  | 1 | 17/27  |
| 4938 | K.HPADIPDYLK.L                    | 1168.59970 | -1.81254 | 2 | 1.08E-08 | 0.88 | 3.08 | 0.75 | 229.3  | 1 | 15/27  |
| 2103 | K.TM*GWEASTER.M                   | 1183.50482 | -1.65903 | 2 | 2.55E-08 | 0.96 | 3.14 | 0.95 | 816.8  | 1 | 18/27  |
| 2420 | K.K#PVQLPGAYK.T                   | 1214.68916 | -1.42477 | 2 | 2.35E-04 | 0.90 | 3.57 | 0.00 | 697.8  | 1 | 15/27  |
| 1019 | L.KDGGHYDAEVK.T                   | 1218.57494 | -2.85826 | 2 | 4.80E-04 | 0.87 | 3.02 | 0.70 | 446.1  | 1 | 15/30  |
| 3682 | D.SSLQDGEFIYK.V                   | 1286.62631 | -0.50568 | 2 | 6.02E-09 | 0.92 | 3.18 | 0.66 | 870.7  | 1 | 16/30  |
| 1638 | K.KTM*GWEASTER.M                  | 1311.59978 | -1.39806 | 2 | 6.21E-05 | 0.93 | 3.95 | 0.76 | 334.6  | 1 | 17/30  |
| 1141 | K.LKDGGHYDAEVK.T                  | 1331.65901 | -1.66696 | 2 | 9.42E-09 | 0.96 | 4.02 | 0.73 | 1041.1 | 1 | 19/33  |
| 1430 | R.PYEGTQTAK#LK.V                  | 1349.70593 | -1.50912 | 3 | 2.92E-02 | 0.21 | 2.56 | 0.09 | 204.7  | 1 | 19/60  |
| 2873 | R.GTNFSPDGPVMQK.K                 | 1377.64673 | -1.11588 | 2 | 2.72E-08 | 0.93 | 4.11 | 0.61 | 564.0  | 1 | 19/36  |
| 2131 | R.GTNFSPDGPVM*QK.K                | 1393.64165 | -1.74990 | 2 | 4.75E-10 | 0.93 | 4.07 | 0.76 | 538.2  | 1 | 17/36  |
| 1215 | K.LK#DGGHYDAEVK.T                 | 1445.70191 | -3.26108 | 2 | 1.34E-03 | 0.57 | 3.63 | 0.64 | 457.2  | 1 | 15/33  |
| 2801 | R.HSTGAENLYFQGH.M                 | 1460.65532 | -1.00032 | 2 | 9.22E-10 | 0.97 | 5.06 | 0.88 | 762.2  | 1 | 22/36  |
| 3460 | R.LIFAGK#QLEDGR.T                 | 1460.78558 | -1.50805 | 2 | 4.07E-07 | 0.81 | 3.74 | 0.24 | 622.7  | 1 | 16/33  |
| 2659 | R.M*YPEDGALKGEIK.M                | 1466.71956 | -1.68663 | 2 | 4.97E-06 | 0.93 | 3.41 | 0.77 | 657.0  | 1 | 19/36  |
| 2151 | K.IQDKEGIPPDQQR.L                 | 1523.78125 | -0.84740 | 2 | 5.02E-05 | 0.92 | 3.87 | 0.70 | 432.9  | 1 | 17/36  |
| 3748 | T.QDSSLQDGEFIYK.V                 | 1529.71183 | -1.74873 | 2 | 6.84E-07 | 0.87 | 3.63 | 0.76 | 259.1  | 1 | 13/36  |
| 2805 | R.M*YPEDGALK#GEIK.M               | 1580.76246 | -1.95469 | 3 | 8.10E-04 | 0.51 | 2.82 | 0.24 | 337.0  | 1 | 24/72  |
| 1907 | R.GTNFSPDGPVM*QK#K.T              | 1635.77951 | -2.60904 | 3 | 5.47E-01 | 0.18 | 2.60 | 0.52 | 279.2  | 1 | 21/78  |
| 5272 | F.AWDILSPQFQYGSK.A                | 1639.81148 | -2.47767 | 2 | 4.72E-10 | 0.96 | 4.24 | 0.86 | 652.8  | 1 | 20/39  |
| 2729 | K.KPVQLPGAYK#TDIK.L               | 1671.94280 | -3.40784 | 3 | 6.43E-08 | 0.86 | 4.33 | 0.25 | 727.2  | 1 | 29/78  |
| 3824 | T.VTQDSSLQDGEFIYK.V               | 1729.82792 | -2.32469 | 2 | 1.16E-05 | 0.91 | 3.36 | 0.70 | 611.8  | 1 | 20/42  |
| 3449 | T.SHNEDYTIVEQYER.A                | 1782.79293 | 1.62162  | 2 | 2.30E-11 | 0.97 | 4.58 | 0.78 | 1611.8 | 1 | 21/39  |
| 5232 | K.TITLEVEPSDTIENVK.A              | 1787.92730 | -1.16482 | 2 | 2.13E-06 | 0.94 | 4.40 | 0.72 | 562.1  | 1 | 20/45  |
| 2531 | K.TTYM*AK#KPVQLPGAYK.T            | 1926.01532 | -2.93109 | 3 | 1.27E-04 | 0.38 | 2.78 | 0.07 | 468.9  | 1 | 25/90  |
| 3286 | R.MEGSVNGHEFEIEGEGEGR.P           | 2062.87707 | -1.37314 | 3 | 9.45E-11 | 0.96 | 5.37 | 0.76 | 868.3  | 1 | 32/108 |
| 2984 | R.M*EGSVNGHEFEIEGEGEGR.P          | 2078.87199 | -1.32644 | 3 | 1.05E-13 | 0.97 | 5.04 | 0.84 | 1635.3 | 1 | 37/108 |
| 3854 | K.TITLEVEPSDTIENVK#AK.I           | 2101.10228 | -1.74764 | 3 | 7.26E-05 | 0.31 | 3.22 | 0.01 | 223.2  | 1 | 24/102 |
| 4347 | K.LDITSHNEDYTIVEQYER.A            | 2225.03568 | -1.29091 | 3 | 7.92E-08 | 0.96 | 4.69 | 0.85 | 883.6  | 1 | 30/102 |
| 4208 | K.TLTGK#TITLEVEPSDTIENVK.A        | 2402.26605 | -2.11853 | 3 | 1.25E-08 | 0.93 | 5.65 | 0.04 | 1317.6 | 1 | 40/120 |
| 2824 | N.GHEFEIEGEGEGRPYEGTQTAK.L        | 2421.09532 | -1.03875 | 3 | 2.15E-06 | 0.90 | 4.00 | 0.83 | 268.7  | 1 | 26/126 |
| 3291 | R.MEGSVNGHEFEIEGEGEGRPYEGTQTAK.L  | 3038.34323 | 0.88427  | 3 | 3.22E-09 | 0.95 | 5.00 | 0.79 | 719.1  | 1 | 32/162 |
| 3040 | R.M*EGSVNGHEFEIEGEGEGRPYEGTQTAK.L | 3054.33815 | -1.95775 | 4 | 1.29E-05 | 0.88 | 4.48 | 0.51 | 490.5  | 1 | 38/243 |

Reference S11-E2C-40

P (pro) Sf Score Coverage MW Accession Peptide (Hits)

| Scan(s) | Peptide         | MH+        | DeltaM (ppm) | z | P (pep)  | Sf    | XC     | DeltaCn | Sp      | RSp | Ions            |
|---------|-----------------|------------|--------------|---|----------|-------|--------|---------|---------|-----|-----------------|
| 1       | RFP_UB_new      |            |              |   | 2.10E-14 | 66.58 | 814.27 | 74.80   | 38172.1 |     | 82 (79 3 0 0 0) |
| 1591    | K.LDITSHN.E     | 799.39446  | -2.36870     | 2 | 4.30E-02 | 0.87  | 2.18   | 0.69    | 430.8   | 1   | 13/18           |
| 1114    | D.GALKGEIK.M    | 815.49853  | -2.55403     | 2 | 6.66E-03 | 0.57  | 2.96   | -       | 531.0   | 1   | 13/21           |
| 3419    | S.TLHLVLR.L     | 851.54615  | -2.38772     | 2 | 4.44E-05 | 0.72  | 2.29   | -       | 501.0   | 1   | 16/18           |
| 1033    | G.HYDAEVK.T     | 861.41011  | -2.15641     | 2 | 6.98E-02 | 0.83  | 2.12   | 0.50    | 595.0   | 1   | 13/18           |
| 1323    | L.SDYNIQK.E     | 867.42067  | -3.48484     | 2 | 5.89E-01 | 0.83  | 2.31   | 0.59    | 443.3   | 1   | 12/18           |
| 2566    | P.VQLPGAYK.T    | 875.49853  | -2.93672     | 2 | 5.67E-05 | 0.67  | 2.05   | 0.84    | 169.6   | 1   | 9/21            |
| 606     | K.LKDGGHYD.A    | 904.41592  | -2.94812     | 2 | 5.22E-02 | 0.71  | 2.26   | 0.79    | 271.9   | 1   | 9/21            |
| 1101    | G.GHYDAEVK.T    | 918.43157  | -2.79751     | 2 | 1.40E-01 | 0.93  | 2.68   | 0.61    | 843.9   | 1   | 17/21           |
| 5836    | K.LSFPEGFK.W    | 924.48254  | -2.59040     | 2 | 4.54E-03 | 0.86  | 2.54   | 0.88    | 377.1   | 1   | 11/21           |
| 3567    | P.ADIPDYLK.L    | 934.48802  | -2.67846     | 2 | 4.09E-01 | 0.21  | 2.24   | -       | 291.7   | 1   | 11/21           |
| 3514    | E.STLHLVLR.L    | 938.57818  | -3.06068     | 2 | 8.41E-05 | 0.63  | 3.03   | -       | 469.8   | 1   | 14/21           |
| 2835    | K.PVQLPGAYK.T   | 972.55129  | -3.30153     | 2 | 5.80E-05 | 0.88  | 2.74   | 0.61    | 578.7   | 1   | 15/24           |
| 2151    | F.PSDGPVM*QK.K  | 974.46116  | -2.75055     | 2 | 1.82E-04 | 0.78  | 2.92   | 0.61    | 243.7   | 1   | 12/24           |
| 2309    | T.LSDYNIQK.E    | 980.50474  | -2.66610     | 2 | 1.30E-05 | 0.90  | 2.97   | 0.67    | 532.0   | 1   | 13/21           |
| 903     | H.HASSEDVIK.E   | 985.49490  | -3.69558     | 2 | 5.87E-05 | 0.86  | 3.19   | 0.74    | 313.7   | 1   | 12/24           |
| 570     | R.PYEGTQTAK.L   | 994.48400  | -2.52248     | 2 | 4.56E-04 | 0.89  | 2.70   | 0.68    | 533.7   | 1   | 15/24           |
| 2405    | R.MYPEDGALK.G   | 1023.48156 | -3.52307     | 2 | 2.51E-04 | 0.82  | 2.67   | 0.68    | 286.7   | 1   | 13/24           |
| 3661    | H.PADIPDYLK.L   | 1031.54079 | -2.92837     | 2 | 1.23E-03 | 0.90  | 3.08   | 0.65    | 604.7   | 1   | 14/24           |
| 2167    | R.M*YPEDGALK.G  | 1039.47648 | -3.51403     | 2 | 6.96E-02 | 0.85  | 2.25   | 0.67    | 400.2   | 1   | 16/24           |
| 3623    | L.KLSFPEGFK.W   | 1052.57751 | -2.73173     | 2 | 5.11E-02 | 0.60  | 2.13   | 0.80    | 133.5   | 1   | 9/24            |
| 4415    | K.ESTLHLVLR.L   | 1067.62077 | -3.31074     | 2 | 2.03E-07 | 0.58  | 3.08   | -       | 364.5   | 1   | 15/24           |
| 3737    | R.TLSDYNIQK.E   | 1081.55242 | -1.12830     | 2 | 4.15E-04 | 0.95  | 3.48   | 0.79    | 578.9   | 1   | 17/24           |
| 1991    | T.M*GWEASTER.M  | 1082.45714 | -2.65045     | 2 | 7.86E-07 | 0.50  | 2.48   | -       | 489.7   | 1   | 15/24           |
| 1590    | K.DGGHYDAEVK.T  | 1090.47998 | -2.97719     | 2 | 1.81E-03 | 0.87  | 3.10   | 0.66    | 509.9   | 1   | 14/27           |
| 2548    | K.KPVQLPGAYK.T  | 1100.64626 | -3.40938     | 2 | 2.54E-05 | 0.84  | 3.27   | 0.69    | 220.2   | 1   | 13/27           |
| 1831    | N.FPSDGPVM*QK.K | 1121.52958 | -3.36365     | 2 | 9.84E-04 | 0.83  | 3.08   | 0.68    | 282.0   | 1   | 13/27           |
| 2581    | Y.PEDGALKGEIK.M | 1156.62083 | -2.89640     | 2 | 2.97E-04 | 0.89  | 3.73   | 0.45    | 585.9   | 1   | 17/30           |
| 2659    | K.TMGWEASTER.M  | 1167.50990 | -3.31444     | 2 | 6.44E-06 | 0.95  | 3.72   | 0.70    | 731.6   | 1   | 18/27           |
| 3924    | K.HPADIPDYLK.L  | 1168.59970 | -2.64821     | 2 | 7.60E-08 | 0.90  | 2.80   | 0.88    | 263.0   | 1   | 16/27           |
| 2042    | K.TM*GWEASTER.M | 1183.50482 | -1.34960     | 2 | 4.61E-07 | 0.96  | 3.29   | 0.95    | 924.3   | 1   | 18/27           |
| 3635    | S.SLQDGEFIYK.V  | 1199.59428 | -2.94628     | 2 | 7.61E-06 | 0.88  | 3.26   | 0.64    | 504.3   | 1   | 14/27           |
| 3073    | D.YTIVEQYER.A   | 1200.58953 | -2.34188     | 2 | 4.62E-05 | 0.95  | 3.31   | 0.62    | 1108.9  | 1   | 18/24           |
| 2346    | K.K#PVQLPGAYK.T | 1214.68916 | -3.03269     | 2 | 8.84E-05 | 0.94  | 3.68   | 0.00    | 1097.9  | 1   | 16/27           |
| 1134    | L.KDGGHYDAEVK.T | 1218.57494 | -1.44181     | 3 | 6.17E-06 | 0.91  | 3.54   | 0.68    | 786.0   | 1   | 25/60           |
| 2294    | E.VEPSDTIENVK.A | 1230.62122 | -1.95120     | 2 | 5.89E-01 | 0.30  | 2.25   | 0.48    | 58.4    | 1   | 10/30           |

|      |                                   |            |          |   |          |      |      |      |        |   |        |
|------|-----------------------------------|------------|----------|---|----------|------|------|------|--------|---|--------|
| 3358 | I.FAGK#QLEDGR.T                   | 1234.61745 | -1.75426 | 2 | 3.52E-04 | 0.83 | 3.39 | 0.18 | 812.5  | 1 | 16/27  |
| 3867 | R.LIFAGK#QLED.G                   | 1247.66300 | -2.14407 | 2 | 4.18E-05 | 0.89 | 3.07 | 0.48 | 763.9  | 1 | 16/27  |
| 3540 | D.SSLQDGEFIYK.V                   | 1286.62631 | -2.78271 | 2 | 1.59E-07 | 0.96 | 3.55 | 0.85 | 1033.8 | 1 | 18/30  |
| 2131 | K.KTMGWEASTER.M                   | 1295.60486 | -1.85017 | 2 | 8.65E-07 | 0.96 | 3.74 | 0.80 | 861.2  | 1 | 19/30  |
| 1553 | K.KTM*GWEASTER.M                  | 1311.59978 | -2.14262 | 2 | 2.55E-06 | 0.93 | 3.35 | 0.82 | 382.4  | 1 | 18/30  |
| 1208 | K.LKDGGHYDAEVK.T                  | 1331.65901 | -1.94196 | 2 | 1.10E-07 | 0.95 | 4.20 | 0.66 | 986.3  | 1 | 18/33  |
| 3314 | R.LIFAGKQLEDGR.T                  | 1346.74268 | -2.82980 | 3 | 2.96E-04 | 0.71 | 3.05 | 0.54 | 248.1  | 1 | 22/66  |
| 2830 | R.GTNFSPDGPVMQK.K                 | 1377.64673 | -2.97664 | 2 | 8.92E-09 | 0.91 | 4.15 | 0.56 | 513.0  | 1 | 18/36  |
| 2141 | R.GTNFSPDGPVM*QK.K                | 1393.64165 | -4.55281 | 2 | 2.50E-07 | 0.96 | 4.43 | 0.80 | 647.2  | 1 | 19/36  |
| 3729 | Q.DSSLQDGEFIYK.V                  | 1401.65325 | -3.05226 | 2 | 2.43E-05 | 0.86 | 2.97 | 0.54 | 595.4  | 1 | 17/33  |
| 1567 | K.K#TM*GWEASTER.M                 | 1425.64268 | -3.53789 | 3 | 9.56E-01 | 0.86 | 3.44 | 0.62 | 374.0  | 1 | 24/60  |
| 3577 | N.EDYTIVEQYER.A                   | 1444.65907 | -2.67626 | 2 | 1.48E-07 | 0.94 | 3.20 | 0.86 | 649.5  | 1 | 17/30  |
| 1248 | K.LJKDGGHYDAEVK.T                 | 1445.70191 | -3.26108 | 2 | 7.14E-03 | 0.75 | 3.98 | 0.05 | 647.1  | 1 | 16/33  |
| 1325 | K.LK#DGGHYDAEVK.T                 | 1445.70191 | -3.50258 | 3 | 9.50E-03 | 0.40 | 3.06 | 0.04 | 429.4  | 1 | 22/66  |
| 2224 | G.TJNFPSDGPVM*QK.K                | 1450.66308 | -2.57359 | 2 | 7.66E-06 | 0.93 | 3.39 | 0.82 | 529.7  | 1 | 17/33  |
| 2873 | R.MYPEDGALKGEIK.M                 | 1450.72464 | -2.00944 | 2 | 4.08E-04 | 0.87 | 3.07 | 0.71 | 311.2  | 1 | 18/36  |
| 2700 | R.HSTGAENLYFQGH.M                 | 1460.65532 | -2.92248 | 2 | 8.39E-08 | 0.97 | 4.99 | 0.89 | 758.1  | 1 | 22/36  |
| 3566 | R.LIFAGK#QLEDGR.T                 | 1460.78558 | -1.50805 | 2 | 1.72E-03 | 0.84 | 3.71 | 0.27 | 643.6  | 1 | 17/33  |
| 2492 | R.M*YPEDGALKGEIK.M                | 1466.71956 | -2.85180 | 2 | 3.21E-05 | 0.95 | 3.86 | 0.73 | 939.1  | 1 | 21/36  |
| 1392 | K.IQDKEGIPPDQQR.L                 | 1523.78125 | -1.40817 | 2 | 2.31E-08 | 0.95 | 4.32 | 0.64 | 649.5  | 1 | 22/36  |
| 3601 | T.QDSSLQDGEFIYK.V                 | 1529.71183 | -2.46693 | 2 | 3.22E-06 | 0.91 | 3.65 | 0.82 | 342.8  | 1 | 15/36  |
| 2712 | R.HSTGAENLYFQGHM*.C               | 1607.69072 | -1.89855 | 2 | 1.20E-08 | 0.92 | 3.68 | 0.85 | 349.3  | 1 | 18/39  |
| 3291 | K.AYVKHPADIPDYLK.L                | 1629.86352 | -2.82125 | 3 | 1.18E-06 | 0.95 | 4.41 | 0.71 | 1130.6 | 1 | 30/78  |
| 2758 | K.LRGTNFPSDGPVMQK.K               | 1646.83190 | -3.56961 | 3 | 9.49E-01 | 0.87 | 3.39 | 0.77 | 414.8  | 1 | 25/84  |
| 2335 | K.LRGTNFPSDGPVM*QK.K              | 1662.82682 | -2.71928 | 3 | 8.75E-07 | 0.96 | 4.08 | 0.94 | 940.0  | 1 | 33/84  |
| 2669 | K.KPVQLPGAYK#TDIK.L               | 1671.94280 | -2.64122 | 3 | 1.85E-06 | 0.82 | 4.47 | 0.20 | 529.5  | 1 | 27/78  |
| 3319 | K.AYVK#HPADIPDYLK.L               | 1743.90642 | -4.66227 | 3 | 9.44E-07 | 0.50 | 2.77 | 0.31 | 294.6  | 1 | 22/78  |
| 3857 | K.TITLEVEPSDTIENVK.A              | 1787.92730 | -3.07652 | 2 | 2.17E-06 | 0.93 | 4.11 | 0.61 | 658.0  | 1 | 22/45  |
| 3589 | G.KTITLEVEPSDTIENVK.A             | 1916.02226 | -3.19239 | 3 | 4.47E-01 | 0.82 | 3.74 | 0.46 | 527.7  | 1 | 26/96  |
| 2444 | K.TTYM*AK#KPVQLPGAYK.T            | 1926.01532 | -2.93109 | 3 | 2.69E-04 | 0.45 | 3.14 | 0.18 | 324.9  | 1 | 22/90  |
| 4050 | K.LDITSHNEDYTIVEQYER.A            | 2225.03568 | -1.53175 | 2 | 2.10E-14 | 0.97 | 4.65 | 0.75 | 1097.4 | 1 | 23/51  |
| 2997 | H.EFEIEGEGEGRPYEGTQTAK.L          | 2227.01495 | -2.96899 | 3 | 1.37E-01 | 0.74 | 2.70 | 0.69 | 279.6  | 1 | 25/114 |
| 3985 | K.TLTGKTITLEVEPSDTIENVK.A         | 2288.22315 | -2.52090 | 3 | 3.42E-10 | 0.95 | 4.86 | 0.65 | 1134.6 | 1 | 36/120 |
| 3988 | K.TLTGK#TITLEVEPSDTIENVK.A        | 2402.26605 | -1.20387 | 3 | 3.79E-10 | 0.91 | 5.30 | 0.05 | 1240.9 | 1 | 40/120 |
| 2717 | N.GHEFEIEGEGEGRPYEGTQTAK.L        | 2421.09532 | -2.92948 | 3 | 8.62E-08 | 0.94 | 4.56 | 0.90 | 512.5  | 1 | 33/126 |
| 4765 | R.VM*NFEDGGVVTVDSSLQDGEFIYK.V     | 2894.34005 | -3.34489 | 2 | 9.11E-05 | 0.83 | 2.51 | 0.78 | 436.6  | 1 | 21/75  |
| 3034 | R.M*EGSVNGHEFEIEGEGEGRPYEGTQTAK.L | 3054.33815 | -1.55809 | 4 | 6.78E-06 | 0.94 | 5.02 | 0.82 | 595.8  | 1 | 44/243 |

| Reference | S12-E2C-80         |            |              |   | P (pro)  | Sf    | Score  | Coverage | MW      | Accession | Peptide (Hits)  |
|-----------|--------------------|------------|--------------|---|----------|-------|--------|----------|---------|-----------|-----------------|
| Scan(s)   | Peptide            | MH+        | DeltaM (ppm) | z | P (pep)  | Sf    | XC     | DeltaCn  | Sp      | RSp       | Ions            |
| 1         | RFP_UB_new         |            |              |   | 1.42E-10 | 43.30 | 546.24 | 71.20    | 38172.1 |           | 55 (53 2 0 0 0) |
| 1040      | D.GALKGEIK.M       | 815.49853  | -2.47919     | 2 | 1.67E-02 | 0.53  | 2.68   | -        | 597.0   | 1         | 13/21           |
| 1257      | S.DTIENVK.A        | 818.42542  | -1.51886     | 2 | 4.96E-02 | 0.55  | 2.24   | 0.31     | 245.8   | 1         | 11/18           |
| 3557      | S.TLHLVLR.L        | 851.54615  | -2.38772     | 2 | 1.80E-04 | 0.72  | 2.30   | -        | 505.0   | 1         | 16/18           |
| 826       | G.GHYDAEVK.T       | 918.43157  | -2.39877     | 2 | 5.93E-03 | 0.47  | 2.16   | 0.56     | 148.2   | 1         | 9/21            |
| 5469      | K.LSFPEGFK.W       | 924.48254  | -2.78846     | 2 | 3.32E-04 | 0.84  | 2.40   | 0.97     | 283.4   | 1         | 10/21           |
| 3582      | P.ADIPDYLK.L       | 934.48802  | -2.02532     | 2 | 3.59E-02 | 0.33  | 2.17   | -        | 333.4   | 1         | 13/21           |
| 3559      | E.STLHLVLR.L       | 938.57818  | -2.34536     | 2 | 2.05E-05 | 0.72  | 2.93   | -        | 706.8   | 1         | 15/21           |
| 2396      | T.LSDYNIQK.E       | 980.50474  | -2.60385     | 2 | 2.26E-05 | 0.91  | 3.12   | 0.66     | 482.0   | 1         | 14/21           |
| 560       | R.PYEGTQAK.L       | 994.48400  | -3.13622     | 2 | 1.98E-01 | 0.81  | 2.33   | 0.61     | 492.5   | 1         | 14/24           |
| 2586      | R.MYPEDGALK.G      | 1023.48156 | -3.16526     | 2 | 5.44E-05 | 0.73  | 2.47   | 0.54     | 290.3   | 1         | 13/24           |
| 3288      | H.PADIPDYLK.L      | 1031.54079 | -2.92837     | 2 | 1.78E-03 | 0.86  | 2.76   | 0.77     | 471.9   | 1         | 12/24           |
| 2128      | R.M*YPEDGALK.G     | 1039.47648 | -1.98738     | 2 | 1.27E-03 | 0.79  | 2.07   | 0.63     | 339.8   | 1         | 15/24           |
| 4122      | K.ESTLHLVLR.L      | 1067.62077 | -3.53942     | 2 | 1.04E-07 | 0.90  | 3.14   | -        | 138.7   | 1         | 12/24           |
| 2581      | R.TLSDYNIQK.E      | 1081.55242 | -2.93415     | 2 | 2.20E-05 | 0.95  | 3.35   | 0.87     | 500.7   | 1         | 17/24           |
| 1348      | K.DGGHYDAEVK.T     | 1090.47998 | -2.97719     | 2 | 2.60E-05 | 0.87  | 3.11   | 0.70     | 367.7   | 1         | 14/27           |
| 5130      | K.KPVQLPGAYK.T     | 1100.64626 | -2.41121     | 2 | 5.46E-03 | 0.79  | 3.29   | 0.52     | 275.1   | 1         | 13/27           |
| 2664      | Y.PEDGALKGEIK.M    | 1156.62083 | -2.79086     | 2 | 8.08E-06 | 0.81  | 3.28   | 0.42     | 492.1   | 1         | 15/30           |
| 2754      | K.TMGWEASTER.M     | 1167.50990 | -2.68710     | 2 | 3.51E-07 | 0.92  | 3.69   | 0.61     | 546.7   | 1         | 16/27           |
| 4276      | K.HPADIPDYLK.L     | 1168.59970 | -2.85713     | 2 | 5.04E-07 | 0.85  | 2.90   | 0.76     | 172.4   | 1         | 14/27           |
| 2082      | K.TM*GWEASTER.M    | 1183.50482 | -2.58732     | 2 | 1.35E-08 | 0.96  | 3.36   | 0.92     | 881.3   | 1         | 18/27           |
| 2437      | K.K#PVQLPGAYK.T    | 1214.68916 | -2.93219     | 2 | 2.13E-06 | 0.96  | 3.60   | 0.00     | 1611.4  | 1         | 19/27           |
| 1199      | L.KDGGHYDAEVK.T    | 1218.57494 | -2.25721     | 2 | 6.50E-05 | 0.81  | 2.95   | 0.48     | 470.7   | 1         | 16/30           |
| 3493      | I.FAGK#QLEDGR.T    | 1234.61745 | -2.54525     | 2 | 1.28E-07 | 0.81  | 3.48   | 0.20     | 692.6   | 1         | 15/27           |
| 3656      | D.SSLQDGEFIYK.V    | 1286.62631 | -3.44685     | 2 | 9.22E-10 | 0.93  | 3.52   | 0.73     | 710.8   | 1         | 16/30           |
| 2197      | K.KTMGWEASTER.M    | 1295.60486 | -2.88658     | 2 | 6.24E-08 | 0.95  | 4.19   | 0.80     | 590.3   | 1         | 18/30           |
| 1582      | K.KTM*GWEASTER.M   | 1311.59978 | -1.86341     | 2 | 1.70E-05 | 0.90  | 3.54   | 0.70     | 318.0   | 1         | 16/30           |
| 1232      | K.LKDGGHYDAEVK.T   | 1331.65901 | -2.58363     | 2 | 3.93E-08 | 0.96  | 4.16   | 0.65     | 1066.8  | 1         | 19/33           |
| 2753      | R.GTNFSPDGPVMQK.K  | 1377.64673 | -2.44500     | 2 | 4.87E-10 | 0.92  | 3.92   | 0.61     | 586.3   | 1         | 19/36           |
| 2296      | R.GTNFSPDGPVM*QK.K | 1393.64165 | 0.79024      | 2 | 1.33E-07 | 0.94  | 4.19   | 0.78     | 585.0   | 1         | 18/36           |
| 3839      | Q.DSSLQDGEFIYK.V   | 1401.65325 | -2.09427     | 2 | 7.97E-07 | 0.72  | 2.52   | 0.61     | 337.9   | 1         | 14/33           |
| 3695      | N.EDYTIVEQYER.A    | 1444.65907 | -2.16928     | 2 | 2.62E-08 | 0.89  | 2.68   | 0.86     | 473.2   | 1         | 15/30           |
| 2979      | R.MYPEDGALKGEIK.M  | 1450.72464 | -2.76674     | 2 | 2.70E-02 | 0.55  | 2.80   | 0.58     | 104.9   | 1         | 11/36           |
| 2795      | R.HSTGAENLYFQGH.M  | 1460.65532 | -2.17033     | 2 | 1.76E-07 | 0.96  | 4.18   | 0.86     | 646.3   | 1         | 20/36           |



|      |                                  |            |          |   |          |      |      |      |        |   |        |
|------|----------------------------------|------------|----------|---|----------|------|------|------|--------|---|--------|
| 3542 | R.LIFAGK#QLEDGR.T                | 1460.78558 | -1.34092 | 2 | 3.64E-09 | 0.85 | 3.70 | 0.32 | 602.8  | 1 | 17/33  |
| 2779 | R.M*YPEDGALKGEIK.M               | 1466.71956 | -2.76858 | 2 | 1.91E-06 | 0.91 | 3.32 | 0.78 | 406.9  | 1 | 18/36  |
| 3870 | R.MEGSVNGHEFEIE.G                | 1477.62638 | -2.63994 | 2 | 1.03E-05 | 0.84 | 3.02 | 0.75 | 364.0  | 1 | 14/36  |
| 1339 | K.IQDKEGIPPDQQR.L                | 1523.78125 | -2.20927 | 2 | 1.33E-09 | 0.94 | 4.10 | 0.58 | 596.0  | 1 | 21/36  |
| 3714 | T.QDSSLQDGEFIYK.V                | 1529.71183 | -1.82853 | 2 | 1.34E-06 | 0.86 | 3.06 | 0.78 | 285.6  | 1 | 15/36  |
| 928  | E.GEGEGRPYEGTQTAK.L              | 1579.73469 | -2.17824 | 2 | 9.11E-03 | 0.75 | 2.72 | 0.81 | 175.0  | 1 | 13/42  |
| 2868 | K.LRGTNFSPDGPVMQK.K              | 1646.83190 | -2.23537 | 3 | 1.28E-02 | 0.91 | 3.14 | 0.79 | 777.7  | 1 | 29/84  |
| 2424 | K.LRGTNFSPDGPVM*QK.K             | 1662.82682 | -2.38893 | 3 | 8.72E-08 | 0.96 | 4.11 | 0.91 | 844.2  | 1 | 33/84  |
| 2757 | K.KPVQLPGAYK#TDIK.L              | 1671.94280 | -2.31267 | 3 | 2.81E-04 | 0.47 | 3.32 | 0.11 | 338.1  | 1 | 23/78  |
| 3427 | K.AYVK#HPADIPDYLK.L              | 1743.90642 | -2.98232 | 3 | 1.78E-03 | 0.50 | 3.12 | 0.31 | 231.7  | 1 | 19/78  |
| 5840 | K.TITLEVEPSDTIENVK.A             | 1787.92730 | -1.84757 | 2 | 6.19E-07 | 0.93 | 4.21 | 0.71 | 427.7  | 1 | 19/45  |
| 4180 | K.LDITSHNEDYTIVEQYER.A           | 2225.03568 | -2.60760 | 3 | 1.42E-10 | 0.91 | 4.07 | 0.75 | 596.1  | 1 | 24/102 |
| 4127 | K.TLTGK#TITLEVEPSDTIENVK.A       | 2402.26605 | -2.34720 | 3 | 2.10E-09 | 0.90 | 4.81 | 0.14 | 1108.0 | 1 | 37/120 |
| 4848 | R.VM*NFEDEGGVVTVTQDSSLQDGEFIYK.V | 2894.34005 | 0.61961  | 2 | 2.76E-03 | 0.64 | 2.24 | 0.75 | 174.5  | 1 | 14/75  |

| Reference | S13-c5B-20     |            |              |   | P (pro)  | Sf    | Score  | Coverage | MW      | Accession | Peptide (Hits)  |
|-----------|----------------|------------|--------------|---|----------|-------|--------|----------|---------|-----------|-----------------|
| Scan(s)   | Peptide        | MH+        | DeltaM (ppm) | z | P (pep)  | Sf    | XC     | DeltaCn  | Sp      | RSp       | Ions            |
| 1         | RFP_UB_new     |            |              |   | 4.39E-10 | 50.41 | 638.24 | 70.30    | 38172.1 |           | 65 (59 6 0 0 0) |
| 1052      | D.GALKGEIK.M   | 815.49853  | 3.80770      | 2 | 1.15E-02 | 0.62  | 3.04   | -        | 646.0   | 1         | 13/21           |
| 1125      | R.HSTGAENL.Y   | 828.38462  | 4.06241      | 2 | 9.85E-03 | 0.18  | 2.08   | 0.22     | 186.0   | 1         | 9/21            |
| 3355      | S.TLHLVLR.L    | 851.54615  | 4.34979      | 2 | 2.39E-04 | 0.55  | 2.13   | -        | 397.6   | 1         | 14/18           |
| 1060      | G.HYDAEVK.T    | 861.41011  | 3.93712      | 2 | 1.93E-02 | 0.85  | 2.35   | 0.58     | 540.8   | 1         | 12/18           |
| 1321      | L.SDYNIQK.E    | 867.42067  | 3.12938      | 2 | 2.17E-01 | 0.69  | 2.14   | 0.54     | 380.4   | 1         | 10/18           |
| 907       | G.GHYDAEVK.T   | 918.43157  | 2.51896      | 2 | 5.14E-02 | 0.79  | 2.56   | 0.61     | 321.2   | 1         | 12/21           |
| 4020      | K.LSFPEGFK.W   | 924.48254  | 3.08740      | 2 | 2.32E-05 | 0.89  | 2.24   | 0.81     | 514.6   | 1         | 14/21           |
| 3385      | P.ADIPDYLK.L   | 934.48802  | 2.87324      | 2 | 1.34E-06 | 0.24  | 2.16   | -        | 263.6   | 1         | 12/21           |
| 3354      | E.STLHLVLR.L   | 938.57818  | 3.70237      | 2 | 2.34E-05 | 0.67  | 3.01   | -        | 608.5   | 1         | 14/21           |
| 2739      | K.PVQLPGAYK.T  | 972.55129  | 2.84873      | 2 | 2.35E-05 | 0.82  | 2.72   | 0.52     | 506.9   | 1         | 14/24           |
| 2054      | F.PSDGPVM*QK.K | 974.46116  | 3.57556      | 2 | 9.31E-03 | 0.84  | 3.05   | 0.64     | 274.4   | 1         | 13/24           |
| 2225      | T.LSDYNIQK.E   | 980.50474  | 2.37605      | 2 | 8.29E-05 | 0.93  | 2.91   | 0.78     | 560.6   | 1         | 15/21           |
| 710       | R.PYEGTQTAK.L  | 994.48400  | 2.08055      | 2 | 1.73E-02 | 0.92  | 2.55   | 0.72     | 763.9   | 1         | 17/24           |
| 2370      | R.MYPEDGALK.G  | 1023.48156 | 2.67896      | 2 | 4.43E-05 | 0.87  | 2.52   | 0.71     | 389.7   | 1         | 15/24           |
| 3066      | H.PADIPDYLK.L  | 1031.54079 | 2.98852      | 2 | 4.17E-04 | 0.88  | 2.73   | 0.75     | 530.5   | 1         | 13/24           |
| 2067      | R.M*YPEDGALK.G | 1039.47648 | 3.06230      | 2 | 5.71E-03 | 0.86  | 2.63   | 0.56     | 429.0   | 1         | 16/24           |
| 1716      | K.LDITSHNED.Y  | 1043.46399 | 2.26350      | 2 | 1.30E-03 | 0.81  | 2.22   | 0.72     | 409.8   | 1         | 13/24           |
| 3437      | K.ESTLHLVLR.L  | 1067.62077 | 3.66391      | 2 | 3.86E-08 | 0.51  | 2.74   | -        | 237.8   | 1         | 16/24           |
| 2326      | R.TLSDYNIQK.E  | 1081.55242 | 2.59627      | 2 | 5.01E-06 | 0.95  | 2.86   | 0.96     | 561.0   | 1         | 18/24           |

|      |                         |            |          |   |          |      |      |      |       |   |        |
|------|-------------------------|------------|----------|---|----------|------|------|------|-------|---|--------|
| 1892 | T.M*GWEASTER.M          | 1082.45714 | 2.87536  | 2 | 6.69E-04 | 0.94 | 2.77 | 0.86 | 785.3 | 1 | 17/24  |
| 1037 | K.DGGHYDAEVK.T          | 1090.47998 | 3.06767  | 2 | 3.93E-06 | 0.91 | 3.01 | 0.76 | 536.6 | 1 | 16/27  |
| 2118 | K.KPVQLPGAYK.T          | 1100.64626 | 2.46873  | 2 | 1.58E-06 | 0.88 | 3.26 | 0.61 | 373.5 | 1 | 16/27  |
| 2579 | Y.PEDGALKGEIK.M         | 1156.62083 | 3.75265  | 2 | 9.74E-05 | 0.72 | 2.98 | 0.44 | 373.3 | 1 | 14/30  |
| 2682 | K.TMGWEASTER.M          | 1167.50990 | 3.27260  | 2 | 4.34E-03 | 0.93 | 3.65 | 0.68 | 534.1 | 1 | 16/27  |
| 3255 | K.HPADIPDYLK.L          | 1168.59970 | 3.30593  | 2 | 2.50E-07 | 0.87 | 2.81 | 0.93 | 155.2 | 1 | 13/27  |
| 2049 | K.TM*GWEASTER.M         | 1183.50482 | 3.08555  | 2 | 2.42E-05 | 0.91 | 2.90 | 0.85 | 564.0 | 1 | 14/27  |
| 2398 | R.TLSDYNIQKE.S          | 1210.59501 | -2.00857 | 2 | 1.16E-02 | 0.59 | 2.21 | 0.67 | 120.7 | 1 | 11/27  |
| 2264 | K.K#PVQLPGAYK.T         | 1214.68916 | 3.29850  | 2 | 4.22E-05 | 0.88 | 2.75 | 0.00 | 810.1 | 1 | 14/27  |
| 1265 | L.KDGGHYDAEVK.T         | 1218.57494 | 4.94433  | 3 | 1.45E-02 | 0.78 | 3.06 | 0.64 | 403.3 | 1 | 19/60  |
| 3215 | R.HSTGAENLYFQ.G         | 1266.57494 | 2.84000  | 2 | 6.75E-03 | 0.38 | 2.02 | 0.46 | 295.8 | 1 | 11/30  |
| 3443 | D.SSLQDGEFIYK.V         | 1286.62631 | 3.28937  | 2 | 5.98E-07 | 0.90 | 2.73 | 0.76 | 726.4 | 1 | 16/30  |
| 2833 | L.SSSEHMQIFVK.T         | 1292.63035 | 3.07651  | 2 | 4.52E-05 | 0.89 | 2.76 | 0.80 | 464.4 | 1 | 16/30  |
| 2047 | K.KTMGWEASTER.M         | 1295.60486 | 2.95498  | 2 | 2.51E-07 | 0.91 | 3.86 | 0.72 | 365.0 | 1 | 14/30  |
| 1822 | L.SSSEHM*QIFVK.T        | 1308.62527 | 3.37616  | 2 | 5.80E-05 | 0.90 | 3.02 | 0.80 | 323.5 | 1 | 17/30  |
| 1504 | K.KTM*GWEASTER.M        | 1311.59978 | 3.31498  | 3 | 4.35E-02 | 0.84 | 3.56 | 0.68 | 250.3 | 1 | 21/60  |
| 1130 | K.LKDGGHYDAEVK.T        | 1331.65901 | 3.74145  | 2 | 6.77E-09 | 0.95 | 4.02 | 0.65 | 994.4 | 1 | 18/33  |
| 2646 | R.GTNFSDGPMQK.K         | 1377.64673 | 4.90946  | 2 | 4.39E-10 | 0.92 | 4.12 | 0.60 | 519.5 | 1 | 18/36  |
| 2246 | R.GTNFSDGPM*QK.K        | 1393.64165 | 3.94351  | 2 | 1.25E-05 | 0.94 | 3.59 | 0.79 | 654.0 | 1 | 19/36  |
| 3480 | N.EDYTIVEQYER.A         | 1444.65907 | 3.91455  | 2 | 2.03E-08 | 0.83 | 2.82 | 0.73 | 373.1 | 1 | 13/30  |
| 1238 | K.LK#DGGHYDAEVK.T       | 1445.70191 | 2.81837  | 2 | 1.91E-03 | 0.45 | 3.34 | 0.50 | 412.5 | 1 | 14/33  |
| 2864 | R.MYPEDGALKGEIK.M       | 1450.72464 | 3.62824  | 2 | 6.50E-08 | 0.87 | 2.89 | 0.71 | 320.8 | 1 | 19/36  |
| 2623 | R.HSTGAENLYFQGH.M       | 1460.65532 | 2.66765  | 3 | 2.72E-05 | 0.91 | 3.32 | 0.78 | 785.6 | 1 | 25/72  |
| 3275 | R.LIFAGK#QLEDGR.T       | 1460.78558 | 3.17158  | 2 | 6.42E-07 | 0.88 | 3.89 | 0.34 | 619.0 | 1 | 18/33  |
| 2564 | R.M*YPEDGALKGEIK.M      | 1466.71956 | 4.72183  | 2 | 5.19E-04 | 0.95 | 3.39 | 0.78 | 845.8 | 1 | 21/36  |
| 1986 | K.IQDKEGIPDQQR.L        | 1523.78125 | 3.95921  | 2 | 1.91E-07 | 0.95 | 4.13 | 0.65 | 652.3 | 1 | 22/36  |
| 3508 | T.QDSSLQDGEFIYK.V       | 1529.71183 | 4.07664  | 2 | 2.21E-04 | 0.65 | 2.47 | 0.53 | 251.5 | 1 | 15/36  |
| 2619 | R.HSTGAENLYFQGHM*.C     | 1607.69072 | 3.74980  | 3 | 1.32E-03 | 0.92 | 3.61 | 0.88 | 728.0 | 1 | 22/78  |
| 2672 | K.LRGTNFSDGPMQK.K       | 1646.83190 | 3.10158  | 3 | 9.20E-04 | 0.92 | 3.08 | 0.83 | 956.8 | 1 | 30/84  |
| 2144 | K.LRGTNFSDGPM*QK.K      | 1662.82682 | 2.45622  | 3 | 6.33E-02 | 0.84 | 3.06 | 0.71 | 433.7 | 1 | 26/84  |
| 2551 | K.KPVQLPGAYK#TDIK.L     | 1671.94280 | 3.05364  | 3 | 6.73E-05 | 0.79 | 3.56 | 0.28 | 681.8 | 1 | 28/78  |
| 3230 | K.AYVK#HPADIPDYLK.L     | 1743.90642 | 2.68754  | 3 | 6.78E-03 | 0.62 | 2.75 | 0.41 | 415.7 | 1 | 22/78  |
| 3883 | K.TITLEVEPSDTIENVK.A    | 1787.92730 | 2.95828  | 3 | 9.11E-09 | 0.91 | 3.79 | 0.62 | 790.6 | 1 | 30/90  |
| 3073 | R.MEGSVNGHEFEIEGEGR.P   | 2062.87707 | 3.15374  | 3 | 1.21E-04 | 0.89 | 3.73 | 0.85 | 390.9 | 1 | 24/108 |
| 3580 | K.TITLEVEPSDTIENVK#AK.I | 2101.10228 | 4.00409  | 3 | 8.44E-06 | 0.76 | 3.20 | 0.60 | 269.2 | 1 | 24/102 |
| 3911 | K.LDITSHNEDYTIVEQYER.A  | 2225.03568 | 3.31751  | 3 | 5.15E-08 | 0.90 | 3.38 | 0.73 | 748.1 | 1 | 27/102 |

| Reference    | S14-c5B-40          |            |              |   | P (pro)  | Sf    | Score  | Coverage | MW      | Accession | Peptide (Hits)  |
|--------------|---------------------|------------|--------------|---|----------|-------|--------|----------|---------|-----------|-----------------|
| Scan(s)      | Peptide             | MH+        | DeltaM (ppm) | z | P (pep)  | Sf    | XC     | DeltaCn  | Sp      | RSp       | Ions            |
| 1 RFP_UB_new |                     |            |              |   | 9.99E-15 | 31.88 | 404.24 | 60.80    | 38172.1 |           | 41 (38 3 0 0 0) |
| 5577         | K.LSFPEGFK.W        | 924.48254  | 4.86996      | 2 | 7.09E-05 | 0.89  | 2.42   | 0.95     | 419.1   | 1         | 12/21           |
| 3439         | E.STLHLVLR.L        | 938.57818  | 4.80787      | 2 | 1.15E-06 | 0.67  | 2.80   | -        | 579.7   | 1         | 15/21           |
| 2194         | T.LSDYNIQK.E        | 980.50474  | 4.92824      | 2 | 2.45E-05 | 0.90  | 3.21   | 0.65     | 436.9   | 1         | 13/21           |
| 910          | H.HASSEDVIK.E       | 985.49490  | 4.97511      | 2 | 1.71E-03 | 0.89  | 2.79   | 0.82     | 334.5   | 1         | 14/24           |
| 708          | R.PYEGTQTAK.L       | 994.48400  | 4.47412      | 2 | 1.70E-04 | 0.90  | 2.80   | 0.61     | 652.0   | 1         | 16/24           |
| 2349         | R.MYPEDGALK.G       | 1023.48156 | 4.46800      | 2 | 1.66E-04 | 0.85  | 2.25   | 0.73     | 353.5   | 1         | 15/24           |
| 3590         | H.PADIPDYLK.L       | 1031.54079 | 4.52692      | 2 | 3.51E-04 | 0.93  | 3.08   | 0.71     | 673.8   | 1         | 16/24           |
| 1854         | R.M*YPEDGALK.G      | 1039.47648 | 4.70638      | 2 | 7.34E-02 | 0.55  | 2.01   | 0.44     | 229.5   | 1         | 13/24           |
| 4621         | K.EGIPPDQQR.L       | 1039.51670 | 4.76707      | 2 | 3.76E-01 | 0.40  | 2.08   | 0.53     | 81.2    | 1         | 10/24           |
| 4311         | K.ESTLHLVLR.L       | 1067.62077 | 4.80730      | 2 | 2.43E-06 | 0.35  | 3.07   | -        | 218.5   | 1         | 12/24           |
| 5585         | R.TLSDYNIQK.E       | 1081.55242 | 4.40213      | 2 | 4.52E-04 | 0.86  | 2.84   | 0.92     | 180.1   | 1         | 11/24           |
| 1862         | T.M*GWEASTER.M      | 1082.45714 | 4.90524      | 2 | 7.39E-06 | 0.91  | 2.40   | 0.80     | 600.0   | 1         | 16/24           |
| 865          | K.DGGHYDAEVK.T      | 1090.47998 | 4.85874      | 2 | 1.97E-07 | 0.82  | 2.59   | 0.46     | 622.5   | 1         | 16/27           |
| 3753         | K.KPVQLPGAYK.T      | 1100.64626 | 4.24326      | 2 | 5.51E-03 | 0.80  | 3.19   | 0.51     | 260.9   | 1         | 14/27           |
| 1683         | N.FPSDGPVM*QK.K     | 1121.52958 | 4.03766      | 2 | 2.24E-04 | 0.78  | 2.75   | 0.63     | 319.5   | 1         | 13/27           |
| 2572         | K.TMGWEASTER.M      | 1167.50990 | 4.73638      | 2 | 4.19E-07 | 0.95  | 3.88   | 0.73     | 741.9   | 1         | 18/27           |
| 6098 - 6123  | K.HPADIPDYLK.L      | 1168.59970 | 4.40274      | 2 | 3.48E-06 | 0.82  | 2.79   | 0.85     | 108.6   | 1         | 12/27           |
| 1920         | K.TM*GWEASTER.M     | 1183.50482 | 4.94213      | 2 | 1.10E-08 | 0.96  | 3.18   | 0.91     | 988.7   | 1         | 19/27           |
| 3561         | S.SLQDGEFIYK.V      | 1199.59428 | 4.78746      | 2 | 1.66E-03 | 0.87  | 3.10   | 0.63     | 410.8   | 1         | 15/27           |
| 1148         | L.KDGGHYDAEVK.T     | 1218.57494 | 4.35431      | 2 | 6.02E-03 | 0.70  | 2.45   | 0.66     | 345.1   | 1         | 12/30           |
| 1458         | K.KTM*GWEASTER.M    | 1311.59978 | 4.78083      | 3 | 1.13E-01 | 0.69  | 2.87   | 0.57     | 211.4   | 1         | 20/60           |
| 2817         | M.YPEDGALKGEIK.M    | 1319.68416 | 4.97364      | 2 | 6.98E-07 | 0.70  | 2.22   | 0.49     | 512.3   | 1         | 16/33           |
| 1139         | K.LKDGGHYDAEVK.T    | 1331.65901 | 4.84146      | 2 | 1.02E-07 | 0.96  | 3.96   | 0.74     | 1143.1  | 1         | 21/33           |
| 2422         | R.GTNFSPDGPVM*QK.K  | 1393.64165 | 4.99460      | 2 | 5.92E-09 | 0.92  | 3.76   | 0.77     | 449.1   | 1         | 16/36           |
| 1444         | K.K#TM*GWEASTER.M   | 1425.64268 | 4.81052      | 3 | 1.83E-03 | 0.87  | 3.07   | 0.55     | 744.1   | 1         | 25/60           |
| 1169         | K.LK#DGGHYDAEVK.T   | 1445.70191 | 4.67598      | 2 | 4.92E-03 | 0.70  | 3.90   | 0.01     | 590.4   | 1         | 16/33           |
| 2608         | R.HSTGAENLYFQGH.M   | 1460.65532 | 4.92411      | 3 | 2.38E-04 | 0.88  | 3.40   | 0.64     | 683.9   | 1         | 24/72           |
| 3231         | R.LIFAGK#QLEDGR.T   | 1460.78558 | 3.87267      | 3 | 3.30E-04 | 0.68  | 2.83   | 0.38     | 406.1   | 1         | 25/66           |
| 4226         | R.M*YPEDGALKGEIK.M  | 1466.71956 | 4.85831      | 3 | 4.23E-05 | 0.79  | 2.64   | 0.80     | 295.2   | 1         | 22/72           |
| 1511         | K.IQDKEGIPPDQQR.L   | 1523.78125 | 4.84042      | 2 | 8.12E-10 | 0.95  | 4.20   | 0.66     | 640.0   | 1         | 22/36           |
| 2589         | R.M*YPEDGALK#GEIK.M | 1580.76246 | 4.87950      | 3 | 2.57E-04 | 0.39  | 2.83   | 0.07     | 410.3   | 1         | 24/72           |
| 2658         | K.LRGTNFPDGPVMQK.K  | 1646.83190 | 4.99175      | 3 | 5.28E-02 | 0.85  | 3.14   | 0.73     | 514.7   | 1         | 25/84           |
| 2622         | K.KPVQLPGAYK#TDIK.L | 1671.94280 | 4.47736      | 3 | 1.55E-06 | 0.78  | 3.85   | 0.30     | 516.4   | 1         | 25/78           |
| 3198         | K.AYVK#HPADIPDYLK.L | 1743.90642 | 4.68249      | 3 | 4.00E-05 | 0.75  | 3.66   | 0.32     | 377.5   | 1         | 26/78           |

|      |                        |            |         |   |          |      |      |      |       |   |       |
|------|------------------------|------------|---------|---|----------|------|------|------|-------|---|-------|
| 3960 | K.TITLEVEPSDTIENVK.A   | 1787.92730 | 4.80170 | 3 | 1.75E-05 | 0.88 | 3.63 | 0.69 | 506.9 | 1 | 26/90 |
| 4002 | K.LDITSHNEDYTIVEQYER.A | 2225.03568 | 4.39337 | 2 | 9.99E-15 | 0.95 | 4.04 | 0.67 | 972.2 | 1 | 21/51 |

| Reference | S15-c5B-80      |            |              |   | P (pro)  | Sf    | Score  | Coverage | MW      | Accession | Peptide (Hits)  |
|-----------|-----------------|------------|--------------|---|----------|-------|--------|----------|---------|-----------|-----------------|
| Scan(s)   | Peptide         | MH+        | DeltaM (ppm) | z | P (pep)  | Sf    | XC     | DeltaCn  | Sp      | RSp       | Ions            |
| 1         | RFP_UB_new      |            |              |   | 5.88E-12 | 55.91 | 716.28 | 68.50    | 38172.1 |           | 73 (66 7 0 0 0) |
| 1102      | D.GALKGEIK.M    | 815.49853  | 4.85552      | 2 | 9.81E-03 | 0.61  | 3.07   | -        | 580.9   | 1         | 13/21           |
| 3420      | S.TLHLVLR.L     | 851.54615  | 4.70817      | 2 | 1.49E-03 | 0.64  | 2.21   | -        | 449.5   | 1         | 15/18           |
| 1384      | L.SDYNIQK.E     | 867.42067  | 4.46629      | 2 | 3.10E-02 | 0.83  | 2.53   | 0.64     | 393.3   | 1         | 11/18           |
| 2572      | P.VQLPGAYK.T    | 875.49853  | 4.73190      | 2 | 2.20E-04 | 0.78  | 2.19   | 0.91     | 199.8   | 1         | 10/21           |
| 1419      | G.WEASTER.M     | 878.40027  | 4.21947      | 2 | 2.47E-02 | 0.71  | 2.06   | 0.68     | 191.7   | 1         | 10/18           |
| 1423      | I.FJAGKQLE.D    | 906.46793  | 4.79504      | 2 | 3.72E-02 | 0.64  | 2.09   | 0.24     | 502.6   | 1         | 12/18           |
| 1100      | G.GHYDAEVK.T    | 918.43157  | 4.11390      | 2 | 1.16E-01 | 0.80  | 2.89   | 0.41     | 463.8   | 1         | 13/21           |
| 5562      | K.LSFPEGFK.W    | 924.48254  | 4.27577      | 2 | 5.72E-03 | 0.86  | 2.76   | 0.93     | 291.5   | 1         | 10/21           |
| 1409      | E.DGALKGEIK.M   | 930.52547  | 4.62036      | 2 | 1.57E-01 | 0.90  | 2.94   | 0.57     | 689.8   | 1         | 16/24           |
| 3466      | P.ADIPDYLK.L    | 934.48802  | 3.98357      | 2 | 9.26E-03 | 0.34  | 2.27   | -        | 300.4   | 1         | 13/21           |
| 1752      | M.GWEASTER.M    | 935.42174  | 3.65810      | 2 | 1.83E-04 | 0.79  | 2.14   | 0.65     | 485.6   | 1         | 12/21           |
| 3255      | E.STLHLVLR.L    | 938.57818  | 4.87290      | 2 | 3.41E-04 | 0.49  | 2.55   | -        | 513.5   | 1         | 13/21           |
| 2813      | K.PVQLPGAYK.T   | 972.55129  | 3.85285      | 2 | 6.26E-07 | 0.87  | 2.81   | 0.57     | 578.9   | 1         | 15/24           |
| 2332      | T.LSDYNIQK.E    | 980.50474  | 4.86600      | 2 | 8.61E-03 | 0.87  | 2.82   | 0.66     | 332.8   | 1         | 13/21           |
| 658       | R.PYEGTQTAK.L   | 994.48400  | 3.49214      | 2 | 6.93E-04 | 0.77  | 2.23   | 0.64     | 413.5   | 1         | 13/24           |
| 2513      | R.MYPEDGALK.G   | 1023.48156 | 3.99092      | 2 | 1.99E-02 | 0.71  | 2.15   | 0.78     | 212.1   | 1         | 11/24           |
| 3643      | H.PADIPDYLK.L   | 1031.54079 | 3.58021      | 2 | 1.33E-03 | 0.88  | 3.14   | 0.66     | 457.1   | 1         | 13/24           |
| 2085      | R.M*YPEDGALK.G  | 1039.47648 | 4.35408      | 2 | 7.00E-03 | 0.80  | 2.23   | 0.69     | 310.9   | 1         | 14/24           |
| 4396      | K.ESTLHLVLR.L   | 1067.62077 | 4.46429      | 2 | 1.52E-07 | 0.94  | 3.30   | -        | 346.7   | 1         | 14/24           |
| 2269      | R.TLSDYNIQK.E   | 1081.55242 | 3.83780      | 2 | 5.17E-06 | 0.92  | 2.86   | 0.78     | 457.1   | 1         | 16/24           |
| 686       | F.AGK#QLEDGR.T  | 1087.54903 | 4.00755      | 2 | 1.20E-04 | 0.30  | 2.84   | 0.05     | 415.4   | 1         | 10/24           |
| 1177      | K.DGGHYDAEVK.T  | 1090.47998 | 4.18709      | 2 | 5.31E-07 | 0.92  | 3.08   | 0.80     | 606.9   | 1         | 16/27           |
| 2211      | K.KPVQLPGAYK.T  | 1100.64626 | 4.35417      | 2 | 1.09E-06 | 0.83  | 3.27   | 0.59     | 247.9   | 1         | 14/27           |
| 1852      | N.FPSDGPVM*QK.K | 1121.52958 | 4.79955      | 2 | 4.87E-03 | 0.83  | 2.97   | 0.69     | 294.7   | 1         | 13/27           |
| 3060      | T.GAENLYFQGH.M  | 1135.51670 | 4.47155      | 2 | 1.61E-03 | 0.84  | 3.25   | 0.74     | 360.1   | 1         | 11/27           |
| 2674      | Y.PEDGALKGEIK.M | 1156.62083 | 2.59170      | 2 | 6.46E-02 | 0.41  | 3.01   | 0.23     | 194.4   | 1         | 12/30           |
| 2681      | K.TMGWEASTER.M  | 1167.50990 | 4.21360      | 2 | 4.97E-03 | 0.95  | 4.12   | 0.61     | 720.0   | 1         | 18/27           |
| 4613      | K.HPADIPDYLK.L  | 1168.59970 | 4.66389      | 2 | 1.13E-07 | 0.85  | 2.83   | 0.85     | 187.6   | 1         | 13/27           |
| 2069      | K.TM*GWEASTER.M | 1183.50482 | 4.32327      | 2 | 6.92E-07 | 0.96  | 3.14   | 0.93     | 996.1   | 1         | 19/27           |
| 3620      | S.SLQDGEFIYK.V  | 1199.59428 | 3.76986      | 2 | 1.04E-05 | 0.86  | 3.26   | 0.53     | 386.2   | 1         | 15/27           |
| 2152      | K.KTMGWEASTER.M | 1295.60486 | 4.65092      | 2 | 8.27E-08 | 0.85  | 2.84   | 0.72     | 440.8   | 1         | 14/30           |

|      |                                   |            |         |   |          |      |      |      |        |   |        |
|------|-----------------------------------|------------|---------|---|----------|------|------|------|--------|---|--------|
| 1592 | K.KTM*GWEASTER.M                  | 1311.59978 | 4.37227 | 2 | 6.45E-06 | 0.92 | 3.09 | 0.78 | 382.5  | 1 | 18/30  |
| 1281 | K.LKDGGHYDAEVK.T                  | 1331.65901 | 4.38312 | 2 | 1.04E-07 | 0.95 | 3.64 | 0.71 | 1005.3 | 1 | 19/33  |
| 2709 | R.GTNFSPDGPVMQK.K                 | 1377.64673 | 4.73224 | 2 | 5.35E-09 | 0.87 | 3.35 | 0.57 | 505.8  | 1 | 18/36  |
| 2344 | R.GTNFSPDGPVM*QK.K                | 1393.64165 | 4.20628 | 2 | 7.01E-08 | 0.94 | 4.19 | 0.80 | 481.1  | 1 | 17/36  |
| 2829 | V.K#HPADIPDYLK.L                  | 1410.73756 | 3.60519 | 3 | 4.35E-01 | 0.83 | 3.12 | 0.00 | 585.3  | 1 | 22/60  |
| 1596 | K.K#TM*GWEASTER.M                 | 1425.64268 | 4.29677 | 3 | 3.04E-02 | 0.89 | 3.51 | 0.64 | 611.7  | 1 | 24/60  |
| 1305 | K.LK#DGGHYDAEVK.T                 | 1445.70191 | 4.25379 | 2 | 7.32E-07 | 0.67 | 3.75 | 0.63 | 590.0  | 1 | 16/33  |
| 2954 | R.MYPEDGALKGEIK.M                 | 1450.72464 | 4.89040 | 2 | 3.47E-05 | 0.81 | 3.18 | 0.56 | 254.3  | 1 | 17/36  |
| 2705 | R.HSTGAENLYFQGH.M                 | 1460.65532 | 3.93044 | 2 | 2.36E-09 | 0.96 | 4.71 | 0.85 | 553.9  | 1 | 19/36  |
| 3327 | R.LIFAGK#QLEDGR.T                 | 1460.78558 | 4.17436 | 2 | 5.06E-06 | 0.64 | 3.10 | 0.22 | 542.4  | 1 | 14/33  |
| 2660 | R.M*YPEDGALKGEIK.M                | 1466.71956 | 4.22247 | 2 | 2.21E-04 | 0.94 | 3.58 | 0.76 | 750.4  | 1 | 20/36  |
| 3091 | T.LEVEPSDTIENVK.A                 | 1472.74788 | 4.45554 | 2 | 1.13E-06 | 0.95 | 4.13 | 0.68 | 784.4  | 1 | 22/36  |
| 2089 | K.IQDKEGIPPDQQR.L                 | 1523.78125 | 4.84042 | 2 | 2.50E-08 | 0.95 | 4.30 | 0.62 | 635.7  | 1 | 22/36  |
| 3596 | T.QDSSLQDGEFIYK.V                 | 1529.71183 | 4.63523 | 2 | 4.40E-04 | 0.79 | 3.21 | 0.67 | 230.4  | 1 | 13/36  |
| 2699 | R.M*YPEDGALK#GEIK.M               | 1580.76246 | 3.03467 | 2 | 6.71E-05 | 0.67 | 2.96 | 0.32 | 374.1  | 1 | 16/36  |
| 3291 | K.AYVKHPADIPDYLK.L                | 1629.86352 | 3.69471 | 3 | 7.76E-04 | 0.91 | 4.47 | 0.66 | 492.7  | 1 | 21/78  |
| 2252 | K.LRGTNFPDGPVM*QK.K               | 1662.82682 | 2.67645 | 3 | 5.87E-03 | 0.89 | 3.73 | 0.68 | 507.8  | 1 | 28/84  |
| 2725 | K.KPVQLPGAYK#TDIK.L               | 1671.94280 | 4.03929 | 3 | 4.22E-04 | 0.53 | 3.08 | 0.21 | 413.6  | 1 | 23/78  |
| 3911 | T.ITLEVEPSDTIENVK.A               | 1686.87962 | 4.16249 | 2 | 4.59E-08 | 0.90 | 3.61 | 0.63 | 473.7  | 1 | 19/42  |
| 3304 | T.SHNEDYTIVEQYER.A                | 1782.79293 | 4.15506 | 2 | 5.88E-12 | 0.97 | 4.24 | 0.80 | 1507.8 | 1 | 21/39  |
| 4168 | K.TITLEVEPSDTIENVK.A              | 1787.92730 | 4.91163 | 2 | 1.19E-08 | 0.93 | 4.01 | 0.64 | 659.2  | 1 | 22/45  |
| 2440 | K.TTYM*AK#KPVQLPGAYK.T            | 1926.01532 | 4.10406 | 3 | 9.85E-06 | 0.34 | 2.66 | 0.07 | 443.4  | 1 | 25/90  |
| 3443 | D.ITSHNEDYTIVEQYER.A              | 1996.92468 | 4.36763 | 2 | 5.93E-12 | 0.97 | 4.48 | 0.85 | 1001.7 | 1 | 21/45  |
| 2883 | R.M*EGSVNGHEFEIEGEGEGR.P          | 2078.87199 | 4.92719 | 3 | 1.67E-11 | 0.97 | 5.65 | 0.88 | 1307.9 | 1 | 34/108 |
| 3616 | T.GK#TITLEVEPSDTIENVK.A           | 2087.08663 | 4.13071 | 3 | 9.36E-03 | 0.81 | 3.89 | 0.00 | 1210.7 | 1 | 35/102 |
| 3683 | K.TITLEVEPSDTIENVK#AK.I           | 2101.10228 | 4.70126 | 3 | 1.09E-05 | 0.32 | 2.68 | 0.07 | 434.2  | 1 | 25/102 |
| 4044 | K.LDITSHNEDYTIVEQYER.A            | 2225.03568 | 4.30503 | 3 | 1.76E-07 | 0.94 | 4.58 | 0.82 | 711.6  | 1 | 26/102 |
| 3973 | K.TLTGKTITLEVEPSDTIENVK.A         | 2288.22315 | 4.52094 | 3 | 2.62E-04 | 0.80 | 3.49 | 0.57 | 455.6  | 1 | 24/120 |
| 3999 | K.TLTGK#TITLEVEPSDTIENVK.A        | 2402.26605 | 4.11186 | 2 | 2.85E-08 | 0.82 | 4.94 | 0.55 | 689.7  | 1 | 20/60  |
| 2930 | R.M*EGSVNGHEFEIEGEGEGRPYEGTQTAK.L | 3054.33815 | 4.19704 | 4 | 3.61E-07 | 0.93 | 5.10 | 0.69 | 589.8  | 1 | 39/243 |

| Reference | S16-c5C-20   |           |              |   | P (pro)  | Sf    | Score  | Coverage | MW      | Accession | Peptide (Hits)  |
|-----------|--------------|-----------|--------------|---|----------|-------|--------|----------|---------|-----------|-----------------|
| Scan(s)   | Peptide      | MH+       | DeltaM (ppm) | z | P (pep)  | Sf    | XC     | DeltaCn  | Sp      | RSp       | Ions            |
| 1         | RFP_UB_new   |           |              |   | 6.56E-09 | 50.90 | 634.27 | 69.70    | 38172.1 |           | 64 (61 3 0 0 0) |
| 1079      | D.GALKGEIK.M | 815.49853 | 3.43348      | 2 | 1.32E-02 | 0.40  | 2.65   | -        | 459.1   | 1         | 12/21           |
| 3539      | S.TLHLVLR.L  | 851.54615 | 1.84114      | 2 | 1.50E-04 | 0.66  | 2.37   | -        | 430.8   | 1         | 15/18           |
| 455       | K.GEIK#M*R.L | 863.44034 | 1.78422      | 2 | 3.07E-01 | 0.66  | 2.05   | 0.39     | 301.7   | 1         | 10/15           |

|      |                   |            |          |   |          |      |      |      |        |   |       |
|------|-------------------|------------|----------|---|----------|------|------|------|--------|---|-------|
| 1360 | L.SDYNIQK.E       | 867.42067  | 0.24445  | 2 | 8.77E-02 | 0.71 | 2.51 | 0.50 | 321.7  | 1 | 10/18 |
| 879  | G.GHYDAEVK.T      | 918.43157  | 2.18668  | 2 | 1.80E-02 | 0.78 | 2.60 | 0.66 | 299.0  | 1 | 11/21 |
| 5455 | K.LSFPEGFK.W      | 924.48254  | 1.89902  | 2 | 3.96E-04 | 0.92 | 2.28 | 0.98 | 544.7  | 1 | 14/21 |
| 3567 | P.ADIPDYLK.L      | 934.48802  | 0.58724  | 2 | 2.10E-05 | 0.23 | 2.07 | -    | 274.5  | 1 | 12/21 |
| 3542 | E.STLHLVLR.L      | 938.57818  | 1.55640  | 2 | 2.10E-05 | 0.77 | 3.20 | -    | 730.3  | 1 | 15/21 |
| 2895 | K.PVQLPGAYK.T     | 972.55129  | 1.65633  | 2 | 1.08E-03 | 0.85 | 2.96 | 0.50 | 564.5  | 1 | 14/24 |
| 2214 | F.PSDGPVM*QK.K    | 974.46116  | 1.50861  | 2 | 8.16E-02 | 0.85 | 3.27 | 0.62 | 294.4  | 1 | 13/24 |
| 2383 | T.LSDYNIQK.E      | 980.50474  | 1.25557  | 2 | 1.06E-05 | 0.92 | 3.35 | 0.66 | 525.9  | 1 | 14/21 |
| 686  | R.PYEGTQTAK.L     | 994.48400  | 1.52819  | 2 | 1.35E-03 | 0.89 | 2.61 | 0.63 | 657.2  | 1 | 16/24 |
| 2594 | R.MYPEDGALK.G     | 1023.48156 | 1.84407  | 2 | 8.47E-04 | 0.80 | 2.64 | 0.74 | 239.2  | 1 | 12/24 |
| 3250 | H.PADIPDYLK.L     | 1031.54079 | 0.85844  | 2 | 1.98E-04 | 0.92 | 3.04 | 0.73 | 728.2  | 1 | 15/24 |
| 2201 | R.M*YPEDGALK.G    | 1039.47648 | 0.71361  | 2 | 9.32E-03 | 0.72 | 2.32 | 0.56 | 285.5  | 1 | 13/24 |
| 3623 | K.ESTLHLVLR.L     | 1067.62077 | 2.52053  | 2 | 6.56E-09 | 0.63 | 2.99 | -    | 285.4  | 1 | 17/24 |
| 2583 | R.TLSDYNIQK.E     | 1081.55242 | 1.69335  | 2 | 8.55E-07 | 0.95 | 3.14 | 0.92 | 543.3  | 1 | 18/24 |
| 1235 | K.DGGHYDAEVK.T    | 1090.47998 | 2.17213  | 2 | 1.67E-06 | 0.92 | 2.92 | 0.77 | 646.3  | 1 | 17/27 |
| 2455 | K.KPVQLPGAYK.T    | 1100.64626 | 1.58147  | 2 | 9.87E-07 | 0.87 | 3.37 | 0.61 | 313.3  | 1 | 15/27 |
| 1754 | K.IQDKEGIPPD.Q    | 1111.56298 | -1.15778 | 2 | 2.56E-02 | 0.78 | 2.17 | 0.69 | 400.3  | 1 | 14/27 |
| 1849 | N.FPSDGPVM*QK.K   | 1121.52958 | 0.66353  | 2 | 3.76E-03 | 0.68 | 2.68 | 0.41 | 298.5  | 1 | 14/27 |
| 2729 | Y.PEDGALKGEIK.M   | 1156.62083 | 1.32522  | 2 | 2.75E-03 | 0.93 | 3.81 | 0.39 | 961.7  | 1 | 20/30 |
| 2728 | K.TMGWEASTER.M    | 1167.50990 | 1.91337  | 2 | 4.28E-06 | 0.94 | 3.71 | 0.66 | 695.1  | 1 | 18/27 |
| 5258 | K.HPADIPDYLK.L    | 1168.59970 | 1.73905  | 2 | 4.39E-07 | 0.86 | 2.92 | 0.85 | 178.0  | 1 | 13/27 |
| 2072 | K.TM*GWEASTER.M   | 1183.50482 | 2.67298  | 2 | 8.31E-08 | 0.97 | 3.33 | 0.96 | 1047.3 | 1 | 20/27 |
| 3727 | S.SLQDGEFIYK.V    | 1199.59428 | 0.41179  | 2 | 7.18E-04 | 0.83 | 2.84 | 0.58 | 461.2  | 1 | 14/27 |
| 3146 | D.YTIVEQYER.A     | 1200.58953 | 1.82681  | 2 | 2.11E-04 | 0.89 | 3.02 | 0.65 | 544.5  | 1 | 14/24 |
| 2545 | R.TLSDYNIQKE.S    | 1210.59501 | -3.52109 | 2 | 6.63E-01 | 0.38 | 2.60 | 0.38 | 116.1  | 1 | 10/27 |
| 2429 | K.K#PVQLPGAYK.T   | 1214.68916 | 1.79108  | 2 | 1.21E-05 | 0.96 | 3.90 | 0.00 | 1405.5 | 1 | 18/27 |
| 1166 | L.KDGGHYDAEVK.T   | 1218.57494 | 2.35082  | 2 | 8.80E-08 | 0.89 | 3.37 | 0.56 | 587.2  | 1 | 17/30 |
| 3479 | I.FAGK#QLEDGR.T   | 1234.61745 | 1.01418  | 2 | 8.07E-04 | 0.75 | 3.31 | 0.13 | 700.6  | 1 | 15/27 |
| 3629 | D.SSLQDGEFIYK.V   | 1286.62631 | 3.00474  | 2 | 9.38E-08 | 0.88 | 3.07 | 0.76 | 438.0  | 1 | 14/30 |
| 2176 | K.KTMGWEASTER.M   | 1295.60486 | 1.44748  | 2 | 1.68E-08 | 0.96 | 4.04 | 0.74 | 953.1  | 1 | 20/30 |
| 1974 | L.SSEHM*QIFVK.T   | 1308.62527 | 1.88366  | 2 | 1.90E-04 | 0.88 | 2.91 | 0.77 | 302.4  | 1 | 16/30 |
| 1572 | K.KTM*GWEASTER.M  | 1311.59978 | 2.32473  | 2 | 3.14E-07 | 0.92 | 3.71 | 0.78 | 310.3  | 1 | 16/30 |
| 1242 | K.LKDGGHYDAEVK.T  | 1331.65901 | 2.54977  | 2 | 6.11E-08 | 0.96 | 4.20 | 0.63 | 1097.8 | 1 | 19/33 |
| 2718 | R.GTNFSDGPVMQK.K  | 1377.64673 | 3.22591  | 2 | 2.83E-08 | 0.93 | 4.13 | 0.67 | 510.9  | 1 | 18/36 |
| 2394 | R.GTNFSDGPVM*QK.K | 1393.64165 | 2.54206  | 2 | 1.91E-08 | 0.93 | 4.05 | 0.75 | 432.8  | 1 | 17/36 |
| 3666 | N.EDYTIVEQYER.A   | 1444.65907 | 2.30910  | 2 | 7.40E-09 | 0.90 | 2.68 | 0.87 | 520.6  | 1 | 15/30 |
| 1352 | K.LK#DGGHYDAEVK.T | 1445.70191 | 0.99368  | 3 | 2.70E-01 | 0.26 | 3.28 | 0.45 | 287.7  | 1 | 17/66 |

|      |                            |            |         |   |          |      |      |      |        |   |        |
|------|----------------------------|------------|---------|---|----------|------|------|------|--------|---|--------|
| 3031 | R.MYPEDGALKGEIK.M          | 1450.72464 | 2.28193 | 2 | 4.35E-08 | 0.87 | 3.08 | 0.72 | 304.6  | 1 | 18/36  |
| 2774 | R.HSTGAENLYFQGH.M          | 1460.65532 | 1.35139 | 3 | 1.35E-05 | 0.86 | 2.94 | 0.74 | 603.7  | 1 | 25/72  |
| 3528 | R.LIFAGK#QLEDGR.T          | 1460.78558 | 3.25514 | 2 | 1.79E-07 | 0.90 | 4.05 | 0.25 | 801.5  | 1 | 19/33  |
| 2656 | R.M*YPEDGALKGEIK.M         | 1466.71956 | 3.97279 | 2 | 5.85E-06 | 0.95 | 3.76 | 0.79 | 832.7  | 1 | 21/36  |
| 2065 | K.IQDKEGIPPDQQR.L          | 1523.78125 | 2.83767 | 2 | 3.21E-08 | 0.93 | 4.14 | 0.65 | 451.5  | 1 | 19/36  |
| 3692 | T.QDSSLQDGEFIYK.V          | 1529.71183 | 2.32105 | 2 | 1.30E-05 | 0.87 | 3.26 | 0.66 | 385.8  | 1 | 17/36  |
| 2780 | R.HSTGAENLYFQGHM*.C        | 1607.69072 | 1.67011 | 2 | 4.76E-06 | 0.95 | 4.27 | 0.90 | 355.0  | 1 | 19/39  |
| 2840 | K.LRGTNFPDGPVMQK.K         | 1646.83190 | 1.65616 | 3 | 1.28E-04 | 0.86 | 2.97 | 0.67 | 748.6  | 1 | 27/84  |
| 2407 | K.LRGTNFPDGPVM*QK.K        | 1662.82682 | 2.34610 | 3 | 1.69E-07 | 0.96 | 4.31 | 0.83 | 884.3  | 1 | 34/84  |
| 2716 | K.KPVQLPGAYK#TDIK.L        | 1671.94280 | 1.52041 | 3 | 1.27E-08 | 0.77 | 3.64 | 0.23 | 648.7  | 1 | 28/78  |
| 3958 | K.TITLEVEPSDTIENVK.A       | 1787.92730 | 3.34131 | 2 | 3.67E-07 | 0.92 | 4.05 | 0.61 | 499.7  | 1 | 20/45  |
| 2932 | R.M*EGSVNGHEFEIEGEGEGR.P   | 2078.87199 | 2.72521 | 3 | 3.73E-07 | 0.97 | 5.35 | 0.82 | 1278.5 | 1 | 34/108 |
| 3813 | K.TITLEVEPSDTIENVK#AK.I    | 2101.10228 | 2.69688 | 3 | 8.11E-04 | 0.28 | 2.91 | 0.37 | 330.2  | 1 | 25/102 |
| 4144 | K.LDITSHNEDYTIVEQYER.A     | 2225.03568 | 1.01330 | 3 | 5.76E-08 | 0.93 | 4.21 | 0.65 | 808.5  | 1 | 28/102 |
| 4101 | K.TLTGK#TITLEVEPSDTIENVK.A | 2402.26605 | 2.68346 | 3 | 1.53E-07 | 0.71 | 3.86 | 0.03 | 840.2  | 1 | 32/120 |

| Reference | S17-c5C-40     |            |              |   | P (pro)  | Sf    | Score  | Coverage | MW      | Accession | Peptide (Hits)  |
|-----------|----------------|------------|--------------|---|----------|-------|--------|----------|---------|-----------|-----------------|
| Scan(s)   | Peptide        | MH+        | DeltaM (ppm) | z | P (pep)  | Sf    | XC     | DeltaCn  | Sp      | RSp       | Ions            |
| 1         | RFP_UB_new     |            |              |   | 9.43E-15 | 52.15 | 632.29 | 71.20    | 38172.1 |           | 64 (60 4 0 0 0) |
| 1138      | D.GALKGEIK.M   | 815.49853  | 1.48754      | 2 | 2.68E-03 | 0.53  | 2.78   | -        | 546.8   | 1         | 13/21           |
| 3509      | S.TLHLVLR.L    | 851.54615  | 0.69433      | 2 | 2.81E-04 | 0.69  | 2.55   | -        | 418.5   | 1         | 15/18           |
| 1421      | L.SDYNIQK.E    | 867.42067  | 0.94809      | 2 | 4.35E-02 | 0.79  | 2.38   | 0.62     | 299.1   | 1         | 11/18           |
| 1444      | I.FJAGKQLE.D   | 906.46793  | 1.49572      | 2 | 1.24E-01 | 0.51  | 2.32   | 0.25     | 374.1   | 1         | 10/18           |
| 1134      | G.GHYDAEVK.T   | 918.43157  | 0.72465      | 2 | 3.19E-02 | 0.75  | 2.53   | 0.34     | 425.2   | 1         | 14/21           |
| 4247      | K.LSFPEGFK.W   | 924.48254  | 0.44656      | 2 | 5.27E-05 | 0.95  | 2.52   | 0.93     | 711.5   | 1         | 16/21           |
| 3514      | E.STLHLVLR.L   | 938.57818  | 0.71102      | 2 | 1.45E-04 | 0.63  | 2.89   | -        | 535.9   | 1         | 14/21           |
| 2920      | K.PVQLPGAYK.T  | 972.55129  | 0.90324      | 2 | 1.89E-04 | 0.79  | 2.86   | 0.48     | 503.0   | 1         | 13/24           |
| 2353      | F.PSDGPVM*QK.K | 974.46116  | -1.30995     | 2 | 3.38E-03 | 0.83  | 3.10   | 0.58     | 313.9   | 1         | 13/24           |
| 2392      | T.LSDYNIQK.E   | 980.50474  | 0.50859      | 2 | 1.35E-02 | 0.86  | 2.82   | 0.64     | 358.7   | 1         | 13/21           |
| 675       | R.PYEGTQTAK.L  | 994.48400  | 0.30071      | 2 | 3.79E-01 | 0.61  | 2.41   | 0.45     | 311.1   | 1         | 12/24           |
| 3238      | H.PADIPDYLK.L  | 1031.54079 | 2.04182      | 2 | 1.19E-04 | 0.89  | 2.94   | 0.72     | 555.8   | 1         | 13/24           |
| 2135      | R.M*YPEDGALK.G | 1039.47648 | -0.10843     | 2 | 5.75E-03 | 0.76  | 2.57   | 0.66     | 222.7   | 1         | 12/24           |
| 4400      | K.ESTLHLVLR.L  | 1067.62077 | 0.00508      | 2 | 4.39E-09 | 0.44  | 3.54   | -        | 174.6   | 1         | 12/24           |
| 2623      | R.TLSDYNIQK.E  | 1081.55242 | 0.00036      | 2 | 1.09E-04 | 0.95  | 3.50   | 0.87     | 474.1   | 1         | 17/24           |
| 1321      | K.DGGHYDAEVK.T | 1090.47998 | 0.38106      | 2 | 3.71E-07 | 0.90  | 3.08   | 0.72     | 498.5   | 1         | 15/27           |
| 2463      | K.KPVQLPGAYK.T | 1100.64626 | 1.02693      | 2 | 1.56E-05 | 0.90  | 3.51   | 0.67     | 339.4   | 1         | 15/27           |
| 1778      | K.IQDKEGIPPD.Q | 1111.56298 | 0.37968      | 2 | 1.16E-03 | 0.63  | 2.10   | 0.64     | 284.8   | 1         | 12/27           |

|      |                                 |            |          |   |          |      |      |      |        |   |        |
|------|---------------------------------|------------|----------|---|----------|------|------|------|--------|---|--------|
| 1886 | N.FPSDGPVM*QK.K                 | 1121.52958 | -0.42490 | 2 | 2.45E-03 | 0.72 | 2.67 | 0.57 | 220.3  | 1 | 13/27  |
| 2661 | Y.PEDGALKGEIK.M                 | 1156.62083 | -0.04681 | 2 | 3.37E-03 | 0.90 | 3.75 | 0.48 | 608.1  | 1 | 17/30  |
| 2750 | K.TMGWEASTER.M                  | 1167.50990 | -0.07320 | 2 | 1.34E-02 | 0.94 | 3.70 | 0.54 | 873.1  | 1 | 18/27  |
| 5061 | K.HPADIPDYLK.L                  | 1168.59970 | -0.03675 | 2 | 2.01E-07 | 0.87 | 2.83 | 0.83 | 207.2  | 1 | 14/27  |
| 2181 | K.TM*GWEASTER.M                 | 1183.50482 | 0.50697  | 2 | 5.81E-08 | 0.93 | 2.96 | 0.79 | 729.5  | 1 | 17/27  |
| 2429 | K.K#PVQLPGAYK.T                 | 1214.68916 | 0.48464  | 2 | 2.15E-03 | 0.94 | 3.65 | 0.00 | 1062.5 | 1 | 16/27  |
| 1218 | L.KDGGHYDAEVK.T                 | 1218.57494 | 1.14873  | 2 | 1.38E-08 | 0.94 | 3.29 | 0.65 | 960.1  | 1 | 18/30  |
| 3616 | D.SSLQDGEFIYK.V                 | 1286.62631 | 0.25333  | 2 | 2.48E-07 | 0.94 | 3.58 | 0.76 | 824.0  | 1 | 16/30  |
| 1605 | K.KTM*GWEASTER.M                | 1311.59978 | 0.74254  | 2 | 2.82E-07 | 0.92 | 3.21 | 0.83 | 331.2  | 1 | 17/30  |
| 1301 | K.LKDGGHYDAEVK.T                | 1331.65901 | 1.63309  | 2 | 1.87E-07 | 0.96 | 4.12 | 0.71 | 1014.4 | 1 | 18/33  |
| 2790 | R.GTNFPSDGPVMQK.K               | 1377.64673 | 1.01071  | 2 | 3.06E-09 | 0.90 | 3.60 | 0.70 | 411.2  | 1 | 17/36  |
| 6393 | R.GTNFPSDGPVM*QK.K              | 1393.64165 | -0.43603 | 2 | 9.22E-05 | 0.89 | 3.73 | 0.68 | 383.2  | 1 | 16/36  |
| 1340 | I.QDKEGIPPDQQR.L                | 1410.69718 | 1.73704  | 2 | 1.40E-02 | 0.36 | 2.06 | 0.60 | 109.1  | 1 | 10/33  |
| 1620 | K.K#TM*GWEASTER.M               | 1425.64268 | -0.19853 | 3 | 7.94E-01 | 0.77 | 2.58 | 0.00 | 524.0  | 1 | 25/60  |
| 3647 | N.EDYTIVEQYER.A                 | 1444.65907 | 0.95713  | 2 | 3.41E-09 | 0.95 | 3.51 | 0.85 | 702.0  | 1 | 18/30  |
| 1322 | K.LK#DGGHYDAEVK.T               | 1445.70191 | 0.70745  | 2 | 2.80E-05 | 0.85 | 3.47 | 0.00 | 490.8  | 1 | 15/33  |
| 3050 | R.MYPEDGALKGEIK.M               | 1450.72464 | 0.85147  | 2 | 2.24E-05 | 0.69 | 2.73 | 0.67 | 141.5  | 1 | 13/36  |
| 2796 | R.HSTGAENLYFQGH.M               | 1460.65532 | 1.00541  | 2 | 4.63E-11 | 0.96 | 4.28 | 0.83 | 708.3  | 1 | 22/36  |
| 3446 | R.LIFAGK#QLEDGR.T               | 1460.78558 | 1.16602  | 2 | 2.61E-07 | 0.91 | 3.81 | 0.35 | 845.9  | 1 | 20/33  |
| 2669 | R.M*YPEDGALKGEIK.M              | 1466.71956 | 2.39148  | 2 | 4.70E-04 | 0.95 | 3.55 | 0.76 | 904.0  | 1 | 23/36  |
| 1736 | K.IQDKEGIPPDQQR.L               | 1523.78125 | 0.67469  | 2 | 3.54E-09 | 0.95 | 4.43 | 0.60 | 695.0  | 1 | 22/36  |
| 3674 | T.QDSSLQDGEFIYK.V               | 1529.71183 | 1.60285  | 2 | 6.55E-06 | 0.81 | 2.86 | 0.80 | 257.7  | 1 | 13/36  |
| 1937 | R.LKLDKGGHYDAEVK.T              | 1572.83803 | -0.45665 | 3 | 2.56E-05 | 0.79 | 3.07 | 0.52 | 561.7  | 1 | 25/78  |
| 3406 | K.AYVKHPADIPDYLK.L              | 1629.86352 | 0.32439  | 3 | 1.52E-07 | 0.97 | 4.78 | 0.78 | 1413.9 | 1 | 35/78  |
| 2876 | K.LRGTNFPSDGPVMQK.K             | 1646.83190 | 0.43311  | 3 | 1.26E-04 | 0.91 | 3.12 | 0.84 | 723.7  | 1 | 29/84  |
| 2407 | K.LRGTNFPSDGPVM*QK.K            | 1662.82682 | 2.67645  | 3 | 5.25E-09 | 0.96 | 4.47 | 0.89 | 946.4  | 1 | 33/84  |
| 2738 | K.KPVQLPGAYK#TDIK.L             | 1671.94280 | 1.30138  | 3 | 2.11E-06 | 0.79 | 4.09 | 0.16 | 581.8  | 1 | 29/78  |
| 1616 | K.AKIQDKEGIPPDQQR.L             | 1722.91332 | 0.41370  | 3 | 6.59E-04 | 0.87 | 3.90 | 0.64 | 401.3  | 1 | 24/84  |
| 3101 | K.QLEDGRTLSDYNIQK.E             | 1779.88717 | -0.02728 | 3 | 7.99E-02 | 0.85 | 3.81 | 0.66 | 330.6  | 1 | 21/84  |
| 5085 | K.TITLEVEPSDTIENVK.A            | 1787.92730 | 1.15652  | 2 | 3.28E-05 | 0.92 | 4.41 | 0.61 | 460.9  | 1 | 19/45  |
| 2049 | K.LRGTNFPSDGPVM*QKK.T           | 1790.92178 | 0.92163  | 3 | 4.93E-03 | 0.87 | 3.55 | 0.65 | 560.0  | 1 | 27/90  |
| 2965 | R.M*EGSVNGHEFEIEGEGEGR.P        | 2078.87199 | 1.84442  | 3 | 2.94E-11 | 0.96 | 4.84 | 0.67 | 1475.8 | 1 | 36/108 |
| 3792 | K.TITLEVEPSDTIENVK#AK.I         | 2101.10228 | 0.16960  | 3 | 5.30E-04 | 0.34 | 3.59 | 0.01 | 207.5  | 1 | 21/102 |
| 4123 | K.LDITSHNEDYTIVEQYER.A          | 2225.03568 | 3.29612  | 2 | 9.43E-15 | 0.97 | 4.52 | 0.81 | 1268.2 | 1 | 22/51  |
| 4055 | K.TLTGKTITLEVEPSDTIENVK.A       | 2288.22315 | 0.51989  | 3 | 4.79E-05 | 0.92 | 4.48 | 0.61 | 680.4  | 1 | 29/120 |
| 4072 | K.TLTGK#TITLEVEPSDTIENVK.A      | 2402.26605 | 0.32057  | 3 | 1.33E-08 | 0.85 | 5.08 | 0.02 | 901.8  | 1 | 34/120 |
| 4790 | R.VM*NFEDGGVVTVTQDSSLQDGEFIYK.V | 2894.34005 | 0.02915  | 2 | 9.43E-07 | 0.84 | 2.69 | 0.80 | 376.7  | 1 | 20/75  |



3028 R.M\*EGSVNGHEFEIEGEGEGRPYEGTQTAK.L 3054.33815 0.12049 4 1.82E-10 0.95 5.87 0.76 541.9 1 38/243

| Reference    | S18-c5c-40          |            |              |   | P (pro)  | Sf    | Score  | Coverage | MW      | Accession | Peptide (Hits)  |
|--------------|---------------------|------------|--------------|---|----------|-------|--------|----------|---------|-----------|-----------------|
| Scan(s)      | Peptide             | MH+        | DeltaM (ppm) | z | P (pep)  | Sf    | XC     | DeltaCn  | Sp      | RSp       | Ions            |
| 1 RFP_UB_new |                     |            |              |   | 4.99E-10 | 40.66 | 540.22 | 56.70    | 38172.1 |           | 55 (50 5 0 0 0) |
| 3352         | P.ADIPDYLK.L        | 934.48802  | -0.39247     | 2 | 4.32E-04 | 0.50  | 2.60   | -        | 351.2   | 1         | 14/21           |
| 1112         | K.AKIQDKEGIPPDQQR.L | 1722.91332 | -1.07418     | 3 | 1.48E-02 | 0.83  | 3.80   | 0.61     | 272.3   | 1         | 22/84           |
| 1140         | K.DGGHYDAEVK.T      | 1090.47998 | -0.62641     | 2 | 2.50E-08 | 0.81  | 2.32   | 0.71     | 423.0   | 1         | 14/27           |
| 3423         | N.EDYTIVEQYER.A     | 1444.65907 | 0.11216      | 2 | 4.01E-07 | 0.77  | 2.10   | 0.86     | 320.3   | 1         | 12/30           |
| 3408         | K.ESTLHLVLR.L       | 1067.62077 | -1.13831     | 2 | 1.55E-09 | 0.67  | 2.96   | -        | 292.6   | 1         | 18/24           |
| 1665         | N.FPSDGPVM*QK.K     | 1121.52958 | 0.11932      | 2 | 2.63E-03 | 0.61  | 2.16   | 0.59     | 287.1   | 1         | 12/27           |
| 975          | D.GALKGEIK.M        | 815.49853  | -0.08418     | 2 | 8.03E-03 | 0.22  | 2.19   | -        | 401.5   | 1         | 11/21           |
| 967          | D.GGHYDAEVK.T       | 975.45304  | -0.54795     | 2 | 6.59E-04 | 0.11  | 2.32   | 0.36     | 218.1   | 2         | 10/24           |
| 970          | G.GHYDAEVK.T        | 918.43157  | -0.20573     | 2 | 2.13E-02 | 0.49  | 2.26   | 0.46     | 167.9   | 1         | 10/21           |
| 2348         | R.GTNFSDGPVM*QK.K   | 1393.64165 | 0.61506      | 2 | 1.56E-08 | 0.85  | 2.67   | 0.81     | 432.0   | 1         | 15/36           |
| 2625         | R.GTNFSDGPVMQK.K    | 1377.64673 | -0.14119     | 2 | 1.39E-08 | 0.92  | 3.65   | 0.63     | 590.7   | 1         | 19/36           |
| 4447         | K.HPADIPDYLK.L      | 1168.59970 | 0.79892      | 2 | 4.99E-10 | 0.80  | 2.39   | 0.84     | 174.6   | 1         | 13/27           |
| 2586         | R.HSTGAENLYFQGH.M   | 1460.65532 | 0.50398      | 2 | 9.48E-10 | 0.96  | 4.35   | 0.86     | 532.5   | 1         | 20/36           |
| 2587         | R.HSTGAENLYFQGHM*.C | 1607.69072 | -0.35037     | 3 | 2.29E-03 | 0.89  | 3.53   | 0.94     | 312.9   | 1         | 20/78           |
| 1799         | K.IQDKEGIPPDQQR.L   | 1523.78125 | 0.67469      | 2 | 6.04E-10 | 0.89  | 3.67   | 0.65     | 363.6   | 1         | 17/36           |
| 1087         | L.KDGGHYDAEVK.T     | 1218.57494 | -0.35389     | 2 | 1.19E-06 | 0.85  | 2.97   | 0.60     | 513.9   | 1         | 15/30           |
| 2098         | K.KPVQLPGAYK.T      | 1100.64626 | 0.02876      | 2 | 2.78E-07 | 0.78  | 3.06   | 0.52     | 250.1   | 1         | 14/27           |
| 2231         | K.K#PVQLPGAYK.T     | 1214.68916 | 0.18316      | 2 | 6.89E-04 | 0.91  | 3.35   | 0.00     | 670.3   | 1         | 15/27           |
| 2534         | K.KPVQLPGAYK#TDIK.L | 1671.94280 | 0.42524      | 3 | 1.70E-03 | 0.75  | 4.01   | 0.16     | 539.6   | 1         | 27/78           |
| 2001         | K.KTMGWEASTER.M     | 1295.60486 | 0.12842      | 2 | 7.08E-08 | 0.88  | 3.03   | 0.72     | 446.2   | 1         | 15/30           |
| 1442         | K.K#TM*GWEASTER.M   | 1425.64268 | 0.38887      | 2 | 8.24E-04 | 0.85  | 2.61   | 0.80     | 400.9   | 1         | 14/30           |
| 1411         | K.KTM*GWEASTER.M    | 1311.59978 | 0.09106      | 2 | 2.76E-05 | 0.91  | 3.26   | 0.84     | 309.7   | 1         | 16/30           |
| 3244         | R.LIFAGK#QLEDGR.T   | 1460.78558 | -0.17102     | 2 | 1.22E-06 | 0.83  | 3.30   | 0.32     | 564.0   | 1         | 18/33           |
| 1128         | K.LKDGGHYDAEVK.T    | 1331.65901 | -0.01693     | 2 | 7.36E-09 | 0.92  | 3.28   | 0.73     | 780.8   | 1         | 17/33           |
| 2125         | K.LRGTNFPDGPVM*QK.K | 1662.82682 | 0.47411      | 3 | 3.38E-09 | 0.95  | 3.68   | 0.92     | 877.1   | 1         | 32/84           |
| 2708         | K.LRGTNFPDGPVMQK.K  | 1646.83190 | -0.90113     | 3 | 1.25E-02 | 0.95  | 3.47   | 0.76     | 1287.8  | 1         | 33/84           |
| 2191         | T.LSDYNIQK.E        | 980.50474  | -0.61189     | 2 | 1.66E-04 | 0.79  | 2.94   | 0.67     | 226.1   | 1         | 10/21           |
| 3792         | K.LSFPEGFK.W        | 924.48254  | -0.41171     | 2 | 3.64E-06 | 0.91  | 2.00   | -        | 549.0   | 1         | 14/21           |
| 1929         | R.M*YPEDGALK.G      | 1039.47648 | -0.34330     | 2 | 3.50E-05 | 0.80  | 2.11   | 0.62     | 373.2   | 1         | 15/24           |
| 2377         | R.MYPEDGALK.G       | 1023.48156 | -0.42206     | 2 | 6.45E-02 | 0.62  | 2.04   | 0.57     | 281.0   | 1         | 12/24           |
| 2458         | R.M*YPEDGALKGEIK.M  | 1466.71956 | 0.64372      | 2 | 4.89E-06 | 0.95  | 3.36   | 0.78     | 848.4   | 1         | 21/36           |
| 2837         | R.MYPEDGALKGEIK.M   | 1450.72464 | 1.10390      | 2 | 5.29E-07 | 0.81  | 2.92   | 0.69     | 222.2   | 1         | 16/36           |

|      |                      |            |          |   |          |      |      |      |       |   |       |
|------|----------------------|------------|----------|---|----------|------|------|------|-------|---|-------|
| 2552 | R.M*YPEDGALK#GEIK.M  | 1580.76246 | -1.14385 | 3 | 8.87E-05 | 0.58 | 3.18 | 0.21 | 404.3 | 2 | 24/72 |
| 3072 | H.PADIPDYLK.L        | 1031.54079 | -1.98167 | 2 | 1.16E-04 | 0.89 | 2.70 | 0.71 | 671.8 | 1 | 14/24 |
| 3564 | H.PJADIPDYLK.L       | 1145.58369 | -0.65880 | 2 | 6.46E-02 | 0.58 | 2.58 | 0.54 | 149.3 | 1 | 10/24 |
| 2450 | Y.PEDGALKGEIK.M      | 1156.62083 | -0.68005 | 2 | 3.56E-02 | 0.86 | 3.86 | 0.47 | 425.8 | 1 | 15/30 |
| 2110 | K.PVQLPGAYK.T        | 972.55129  | 0.46393  | 2 | 1.08E-04 | 0.53 | 2.40 | 0.40 | 357.3 | 1 | 11/24 |
| 626  | R.PYEGTQTAK.L        | 994.48400  | -1.17226 | 2 | 1.13E-04 | 0.82 | 2.49 | 0.57 | 509.6 | 1 | 14/24 |
| 3449 | T.QDSSLQDGEFIYK.V    | 1529.71183 | -0.15274 | 2 | 1.22E-05 | 0.86 | 3.24 | 0.80 | 268.9 | 1 | 14/36 |
| 3387 | D.SSLQDGEFIYK.V      | 1286.62631 | -0.50568 | 2 | 3.34E-06 | 0.75 | 2.41 | 0.62 | 497.7 | 1 | 13/30 |
| 3334 | E.STLHLVLR.L         | 938.57818  | -0.52454 | 2 | 1.82E-07 | 0.72 | 2.75 | -    | 781.8 | 1 | 15/21 |
| 3690 | K.TITLEVEPSDTIENVK.A | 1787.92730 | 1.42962  | 2 | 1.81E-07 | 0.87 | 3.44 | 0.73 | 300.7 | 1 | 17/45 |
| 3332 | S.TLHLVLR.L          | 851.54615  | -0.38080 | 2 | 7.88E-05 | 0.57 | 2.66 | -    | 345.2 | 1 | 13/18 |
| 2472 | R.TLSDYNIQK.E        | 1081.55242 | -1.24117 | 2 | 1.82E-06 | 0.88 | 2.21 | 0.95 | 333.3 | 1 | 14/24 |
| 1897 | K.TM*GWEASTER.M      | 1183.50482 | -0.62760 | 2 | 2.42E-08 | 0.96 | 3.22 | 0.93 | 857.1 | 1 | 18/27 |
| 2640 | K.TMGWEASTER.M       | 1167.50990 | -0.59598 | 2 | 7.61E-04 | 0.84 | 2.79 | 0.67 | 407.8 | 1 | 14/27 |
| 2953 | D.YTIVEQYER.A        | 1200.58953 | -0.81675 | 2 | 2.98E-05 | 0.87 | 2.66 | 0.69 | 422.2 | 1 | 14/24 |

| Reference | S19-E2D4-20    |            |              |   | P (pro)  | Sf    | Score  | Coverage | MW      | Accession | Peptide (Hits)  |
|-----------|----------------|------------|--------------|---|----------|-------|--------|----------|---------|-----------|-----------------|
| Scan(s)   | Peptide        | MH+        | DeltaM (ppm) | z | P (pep)  | Sf    | XC     | DeltaCn  | Sp      | RSp       | Ions            |
| 1         | RFP_UB_new     |            |              |   | 9.90E-11 | 57.61 | 712.24 | 66.80    | 38172.1 |           | 72 (68 4 0 0 0) |
| 3048      | S.TLHLVLR.L    | 851.54615  | -0.38080     | 2 | 4.20E-05 | 0.61  | 2.47   | -        | 376.6   | 1         | 14/18           |
| 1996      | L.SDYNIQK.E    | 867.42067  | 0.10373      | 2 | 6.12E-04 | 0.88  | 2.68   | 0.63     | 470.5   | 1         | 12/18           |
| 2217      | P.VQLPGAYK.T   | 875.49853  | 0.27016      | 2 | 2.53E-03 | 0.77  | 2.07   | 0.81     | 284.9   | 1         | 11/21           |
| 625       | G.GHYDAEVK.T   | 918.43157  | -0.73738     | 2 | 1.05E-02 | 0.91  | 2.86   | 0.59     | 741.1   | 1         | 15/21           |
| 3527      | K.LSFPEGFK.W   | 924.48254  | -0.47773     | 2 | 5.49E-04 | 0.90  | 2.15   | 0.83     | 509.4   | 1         | 15/21           |
| 3003      | P.ADIPDYLK.L   | 934.48802  | 0.06473      | 2 | 9.92E-07 | 0.52  | 2.67   | -        | 350.1   | 1         | 14/21           |
| 3047      | E.STLHLVLR.L   | 938.57818  | -0.58957     | 2 | 9.96E-06 | 0.75  | 2.90   | -        | 651.3   | 1         | 16/21           |
| 1901      | K.PVQLPGAYK.T  | 972.55129  | -0.60295     | 2 | 4.14E-05 | 0.89  | 2.81   | 0.64     | 609.3   | 1         | 15/24           |
| 1825      | F.PSDGPVM*QK.K | 974.46116  | -0.80888     | 2 | 4.98E-03 | 0.83  | 3.12   | 0.55     | 378.7   | 1         | 13/24           |
| 529       | G.HJYDAEVK.T   | 975.45301  | -2.08410     | 2 | 1.80E-02 | 0.74  | 2.60   | 0.57     | 721.8   | 1         | 14/18           |
| 1988      | T.LSDYNIQK.E   | 980.50474  | -0.11390     | 2 | 1.43E-03 | 0.74  | 2.53   | 0.68     | 243.0   | 1         | 10/21           |
| 486       | R.PYEGTQTAK.L  | 994.48400  | -1.84737     | 2 | 2.61E-04 | 0.94  | 3.06   | 0.73     | 745.3   | 1         | 18/24           |
| 2155      | R.MYPEDGALK.G  | 1023.48156 | -0.42206     | 2 | 4.06E-06 | 0.84  | 2.41   | 0.64     | 409.8   | 1         | 15/24           |
| 2726      | H.PADIPDYLK.L  | 1031.54079 | -0.56161     | 2 | 6.97E-04 | 0.92  | 3.16   | 0.63     | 709.9   | 1         | 15/24           |
| 1737      | R.M*YPEDGALK.G | 1039.47648 | -0.34330     | 2 | 1.31E-04 | 0.86  | 2.54   | 0.68     | 369.4   | 1         | 15/24           |
| 3720      | K.ESLHLVLR.L   | 1067.62077 | -0.33794     | 2 | 1.51E-07 | 0.42  | 3.00   | -        | 277.0   | 1         | 13/24           |
| 2132      | R.TLSDYNIQK.E  | 1081.55242 | -0.67684     | 2 | 4.71E-07 | 0.95  | 3.13   | 0.85     | 600.9   | 1         | 18/24           |
| 1676      | T.M*GWEASTER.M | 1082.45714 | -0.28224     | 2 | 2.19E-03 | 0.92  | 2.59   | 0.84     | 604.4   | 1         | 15/24           |

|      |                    |            |          |   |          |      |      |      |       |   |       |
|------|--------------------|------------|----------|---|----------|------|------|------|-------|---|-------|
| 552  | K.DGGHYDAEVK.T     | 1090.47998 | -0.85030 | 2 | 8.60E-07 | 0.94 | 3.22 | 0.81 | 772.7 | 1 | 17/27 |
| 2291 | K.KPVQLPGAYK.T     | 1100.64626 | -1.74576 | 2 | 2.14E-05 | 0.88 | 3.39 | 0.66 | 276.0 | 1 | 15/27 |
| 1563 | F.PSDGPVM*QKK.T    | 1102.55613 | -0.59720 | 2 | 3.38E-03 | 0.57 | 2.45 | 0.65 | 150.2 | 1 | 10/27 |
| 1491 | K.IQDKEGIPPD.Q     | 1111.56298 | -0.49887 | 2 | 2.01E-01 | 0.59 | 2.18 | 0.63 | 253.6 | 1 | 11/27 |
| 1858 | N.FPSDGPVM*QK.K    | 1121.52958 | 0.01048  | 2 | 4.17E-03 | 0.84 | 3.18 | 0.74 | 302.6 | 1 | 12/27 |
| 2236 | Y.PEDGALKGEIK.M    | 1156.62083 | -0.46897 | 2 | 2.61E-04 | 0.91 | 3.93 | 0.51 | 604.0 | 1 | 17/30 |
| 2326 | K.TMGWEASTER.M     | 1167.50990 | 0.13591  | 2 | 4.76E-04 | 0.92 | 3.33 | 0.72 | 502.9 | 1 | 16/27 |
| 496  | D.KEGIPPDQQR.L     | 1167.61166 | -0.55848 | 2 | 1.20E-04 | 0.69 | 2.47 | 0.76 | 214.7 | 1 | 10/27 |
| 3635 | K.HPADIPDYLK.L     | 1168.59970 | -0.24566 | 2 | 4.74E-08 | 0.86 | 2.78 | 0.90 | 164.9 | 1 | 13/27 |
| 1724 | K.TM*GWEASTER.M    | 1183.50482 | 0.91955  | 2 | 9.54E-08 | 0.96 | 3.34 | 0.93 | 994.5 | 1 | 19/27 |
| 2671 | D.YTIVEQYER.A      | 1200.58953 | -0.71507 | 2 | 5.54E-07 | 0.94 | 3.33 | 0.62 | 829.6 | 1 | 16/24 |
| 2158 | R.TLSDYNIQKE.S     | 1210.59501 | 2.22650  | 2 | 1.99E-01 | 0.53 | 2.35 | 0.58 | 211.1 | 1 | 10/27 |
| 2014 | K.K#PVQLPGAYK.T    | 1214.68916 | -1.32427 | 2 | 1.15E-03 | 0.79 | 2.72 | 0.00 | 529.3 | 1 | 14/27 |
| 686  | L.KDGGHYDAEVK.T    | 1218.57494 | -0.55424 | 2 | 2.05E-06 | 0.86 | 2.93 | 0.57 | 629.2 | 1 | 16/30 |
| 2924 | I.FAGK#QLEDGR.T    | 1234.61745 | -0.66666 | 2 | 5.49E-06 | 0.80 | 3.38 | 0.23 | 658.3 | 1 | 15/27 |
| 1804 | G.RTLSDYNIQK.E     | 1237.65353 | -0.81847 | 2 | 1.16E-03 | 0.76 | 2.60 | 0.52 | 381.5 | 1 | 14/27 |
| 3305 | R.LIFAGK#QLED.G    | 1247.66300 | 0.10623  | 2 | 7.92E-05 | 0.72 | 2.22 | 0.42 | 653.5 | 1 | 14/27 |
| 1511 | N.FPSDGPVM*QKK.T   | 1249.62454 | -1.15666 | 2 | 5.27E-05 | 0.77 | 2.93 | 0.79 | 151.8 | 1 | 11/30 |
| 3068 | D.SSLQDGEFIYK.V    | 1286.62631 | 0.91746  | 2 | 2.36E-07 | 0.84 | 3.00 | 0.59 | 573.5 | 1 | 14/30 |
| 1815 | K.KTM*GWEASTER.M   | 1295.60486 | -0.06002 | 2 | 2.19E-06 | 0.91 | 3.30 | 0.77 | 446.4 | 1 | 16/30 |
| 1364 | K.KTM*GWEASTER.M   | 1311.59978 | 0.09106  | 2 | 1.01E-08 | 0.93 | 3.51 | 0.84 | 326.0 | 1 | 17/30 |
| 2520 | M.YPEDGALKGEIK.M   | 1319.68416 | -0.57634 | 2 | 1.52E-08 | 0.93 | 3.34 | 0.71 | 813.4 | 1 | 18/33 |
| 1166 | K.LKDGGHYDAEVK.T   | 1331.65901 | -0.56694 | 2 | 3.60E-08 | 0.94 | 3.76 | 0.70 | 936.7 | 1 | 17/33 |
| 2380 | R.GTNFSDGPVMQK.K   | 1377.64673 | 1.18793  | 2 | 1.18E-10 | 0.94 | 3.87 | 0.68 | 665.7 | 1 | 20/36 |
| 1959 | R.GTNFSDGPVM*QK.K  | 1393.64165 | 0.70265  | 2 | 1.19E-09 | 0.95 | 4.22 | 0.80 | 583.2 | 1 | 18/36 |
| 3225 | Q.DSSLQDGEFIYK.V   | 1401.65325 | 0.77971  | 2 | 4.80E-05 | 0.76 | 2.34 | 0.69 | 431.5 | 1 | 14/33 |
| 1216 | I.QDKEGIPPDQQR.L   | 1410.69718 | 0.35253  | 2 | 1.55E-03 | 0.55 | 2.43 | 0.58 | 147.0 | 1 | 12/33 |
| 3108 | N.EDYTIVEQYER.A    | 1444.65907 | -0.14133 | 2 | 8.24E-07 | 0.93 | 2.73 | 0.97 | 592.7 | 1 | 16/30 |
| 1153 | K.LK#DGGHYDAEVK.T  | 1445.70191 | -0.39953 | 3 | 1.19E-01 | 0.38 | 2.95 | 0.67 | 486.9 | 1 | 23/66 |
| 2479 | R.MYPEDGALKGEIK.M  | 1450.72464 | -0.57898 | 2 | 1.91E-04 | 0.67 | 2.36 | 0.62 | 223.8 | 1 | 15/36 |
| 2375 | R.HSTGAENLYFQGH.M  | 1460.65532 | 0.16969  | 2 | 7.81E-10 | 0.95 | 4.29 | 0.81 | 411.6 | 1 | 19/36 |
| 2893 | R.LIFAGK#QLEDGR.T  | 1460.78558 | -0.17102 | 2 | 3.68E-08 | 0.77 | 3.59 | 0.24 | 482.7 | 1 | 16/33 |
| 2148 | R.M*YPEDGALKGEIK.M | 1466.71956 | -0.18855 | 2 | 4.43E-04 | 0.95 | 3.56 | 0.79 | 838.9 | 1 | 21/36 |
| 2020 | R.GTNFSDGPVMQKK.T  | 1505.74169 | -0.78155 | 3 | 4.27E-04 | 0.62 | 2.54 | 0.57 | 315.3 | 1 | 21/78 |
| 1155 | K.IQDKEGIPPDQQR.L  | 1523.78125 | 0.11392  | 2 | 1.37E-09 | 0.95 | 4.18 | 0.64 | 625.6 | 1 | 22/36 |
| 3120 | T.QDSSLQDGEFIYK.V  | 1529.71183 | 0.00686  | 2 | 1.30E-04 | 0.72 | 2.41 | 0.76 | 243.5 | 1 | 13/36 |
| 523  | E.GEGEGRPYEGTQAK.L | 1579.73469 | -0.78733 | 2 | 5.70E-05 | 0.89 | 3.60 | 0.84 | 329.4 | 1 | 15/42 |

|      |                                 |            |          |   |          |      |      |      |        |   |        |
|------|---------------------------------|------------|----------|---|----------|------|------|------|--------|---|--------|
| 3057 | R.VM*NFEDGGVVTVD.S              | 1626.73158 | -0.80619 | 2 | 1.01E-03 | 0.89 | 2.77 | 0.73 | 669.2  | 1 | 20/42  |
| 2911 | K.AYVKHPADIPDYLK.L              | 1629.86352 | -1.13608 | 3 | 6.25E-07 | 0.96 | 4.82 | 0.75 | 1070.6 | 1 | 29/78  |
| 2382 | K.LRGTNFPDGPVMQK.K              | 1646.83190 | -0.56757 | 3 | 5.30E-06 | 0.93 | 3.62 | 0.77 | 891.5  | 1 | 29/84  |
| 2134 | K.LRGTNFPDGPVM*QK.K             | 1662.82682 | -0.29670 | 3 | 2.92E-07 | 0.95 | 4.39 | 0.80 | 841.6  | 1 | 32/84  |
| 2331 | K.KPVQLPGAYK#TDIK.L             | 1671.94280 | -0.56041 | 3 | 1.16E-03 | 0.42 | 3.00 | 0.21 | 304.4  | 1 | 20/78  |
| 656  | K.AKIQDKEGIPDQQR.L              | 1722.91332 | -0.64907 | 3 | 8.52E-07 | 0.93 | 4.27 | 0.80 | 468.1  | 1 | 26/84  |
| 2484 | K.QLEDGRTLSDYNIQK.E             | 1779.88717 | -0.74741 | 3 | 2.86E-02 | 0.70 | 3.34 | 0.58 | 202.1  | 1 | 17/84  |
| 3393 | K.TITLEVEPSDTIENVK.A            | 1787.92730 | -0.11408 | 3 | 2.46E-09 | 0.96 | 4.22 | 0.79 | 1056.8 | 1 | 36/90  |
| 1690 | K.LRGTNFPDGPVM*QKK.T            | 1790.92178 | 0.41042  | 3 | 6.29E-03 | 0.90 | 4.11 | 0.76 | 409.0  | 1 | 24/90  |
| 3448 | K.LDITSHNEDYTIVEQYER.A          | 2225.03568 | 0.76642  | 3 | 9.90E-11 | 0.91 | 3.65 | 0.74 | 718.5  | 1 | 26/102 |
| 3382 | K.TLTGK#TITLEVEPSDTIENVK.A      | 2402.26605 | -0.21298 | 3 | 3.74E-08 | 0.76 | 3.84 | 0.47 | 1040.9 | 1 | 35/120 |
| 3867 | R.VM*NFEDGGVVTVDQSSSLQDGEFIYK.V | 2894.34005 | 0.69931  | 3 | 1.13E-05 | 0.89 | 3.60 | 0.73 | 600.8  | 1 | 30/150 |

| Reference | S20-E2D4-40    |            |              |   | P (pro)  | Sf    | Score  | Coverage | MW      | Accession | Peptide (Hits)  |
|-----------|----------------|------------|--------------|---|----------|-------|--------|----------|---------|-----------|-----------------|
| Scan(s)   | Peptide        | MH+        | DeltaM (ppm) | z | P (pep)  | Sf    | XC     | DeltaCn  | Sp      | RSp       | Ions            |
| 1         | RFP_UB_new     |            |              |   | 1.08E-14 | 71.91 | 930.27 | 75.40    | 38172.1 |           | 94 (89 5 0 0 0) |
| 1042      | D.GALKGEIK.M   | 815.49853  | 0.14035      | 2 | 2.48E-02 | 0.52  | 3.15   | -        | 464.5   | 1         | 12/21           |
| 3189      | S.TLHLVLR.L    | 851.54615  | 0.47931      | 2 | 1.81E-03 | 0.47  | 2.16   | -        | 365.6   | 1         | 13/18           |
| 1064      | G.HYDAEVK.T    | 861.41011  | 0.67779      | 2 | 1.04E-01 | 0.82  | 2.50   | 0.58     | 447.9   | 1         | 11/18           |
| 1338      | L.SDYNIQK.E    | 867.42067  | -0.74064     | 2 | 7.48E-02 | 0.78  | 2.30   | 0.48     | 419.0   | 1         | 12/18           |
| 2503      | P.VQLPGAYK.T   | 875.49853  | -0.56642     | 2 | 1.98E-03 | 0.82  | 2.40   | 0.86     | 232.0   | 1         | 11/21           |
| 843       | G.GHYDAEVK.T   | 918.43157  | -0.40510     | 2 | 6.94E-02 | 0.88  | 2.70   | 0.66     | 421.2   | 1         | 14/21           |
| 5029      | K.LSFPEGFK.W   | 924.48254  | 0.18248      | 2 | 5.59E-03 | 0.32  | 2.62   | -        | 387.2   | 1         | 11/21           |
| 3387      | P.ADIPDYLK.L   | 934.48802  | -0.32715     | 2 | 2.62E-04 | 0.21  | 2.33   | -        | 218.9   | 1         | 11/21           |
| 3412      | E.STLHLVLR.L   | 938.57818  | -0.32945     | 2 | 4.96E-06 | 0.77  | 2.91   | -        | 775.0   | 1         | 16/21           |
| 2130      | K.PVQLPGAYK.T  | 972.55129  | 0.15015      | 2 | 5.51E-04 | 0.88  | 2.90   | 0.57     | 592.3   | 1         | 15/24           |
| 2294      | F.PSDGPVM*QK.K | 974.46116  | -0.24516     | 2 | 5.40E-02 | 0.80  | 3.05   | 0.58     | 312.7   | 1         | 12/24           |
| 2243      | T.LSDYNIQK.E   | 980.50474  | -0.36290     | 2 | 1.43E-04 | 0.90  | 3.12   | 0.67     | 426.1   | 1         | 13/21           |
| 938       | H.HASSEDVIK.E  | 985.49490  | -0.90858     | 2 | 2.17E-06 | 0.88  | 2.21   | 0.72     | 535.9   | 1         | 16/24           |
| 619       | R.PYEGTQAK.L   | 994.48400  | -1.29500     | 2 | 1.52E-01 | 0.87  | 2.39   | 0.67     | 602.7   | 1         | 15/24           |
| 3079      | H.PADIPDYLK.L  | 1031.54079 | 0.26675      | 2 | 4.26E-04 | 0.93  | 3.06   | 0.75     | 785.4   | 1         | 15/24           |
| 902       | G.GJHYDAEVK.T  | 1032.47447 | -0.29376     | 2 | 1.65E-02 | 0.88  | 2.83   | 0.52     | 577.7   | 1         | 14/21           |
| 2225      | Y.TIVEQYER.A   | 1037.52620 | -0.26422     | 2 | 1.13E-02 | 0.80  | 2.64   | 0.48     | 392.7   | 1         | 13/21           |
| 2016      | R.M*YPEDGALK.G | 1039.47648 | -0.46073     | 2 | 1.52E-03 | 0.86  | 2.19   | 0.62     | 455.7   | 1         | 17/24           |
| 1452      | K.EGIPDQQR.L   | 1039.51670 | -0.51728     | 2 | 3.77E-03 | 0.69  | 2.01   | 0.84     | 93.5    | 1         | 11/24           |
| 4267      | K.ESTLHLVLR.L  | 1067.62077 | -1.82434     | 2 | 1.25E-07 | 0.60  | 3.33   | -        | 275.2   | 1         | 15/24           |
| 2488      | R.TLSDYNIQK.E  | 1081.55242 | -0.78970     | 2 | 5.08E-06 | 0.95  | 3.50   | 0.79     | 582.9   | 1         | 18/24           |

|      |                     |            |          |   |          |      |      |      |        |   |       |
|------|---------------------|------------|----------|---|----------|------|------|------|--------|---|-------|
| 1044 | K.DGGHYDAEVK.T      | 1090.47998 | -0.51447 | 2 | 5.00E-08 | 0.90 | 2.94 | 0.76 | 519.2  | 1 | 15/27 |
| 4708 | K.KPVQLPGAYK.T      | 1100.64626 | 0.02876  | 2 | 6.75E-04 | 0.84 | 3.55 | 0.60 | 218.2  | 1 | 13/27 |
| 2092 | N.FPSDGPVM*QK.K     | 1121.52958 | 0.77237  | 2 | 7.20E-03 | 0.81 | 3.13 | 0.52 | 369.9  | 1 | 14/27 |
| 2510 | Y.PEDGALKGEIK.M     | 1156.62083 | 0.16427  | 2 | 1.02E-03 | 0.90 | 3.86 | 0.53 | 528.5  | 1 | 16/30 |
| 4790 | K.HPADIPDYLK.L      | 1168.59970 | -0.45458 | 2 | 1.49E-07 | 0.89 | 2.80 | 0.95 | 179.9  | 1 | 14/27 |
| 4431 | K.TM*GWEASTER.M     | 1183.50482 | 0.19755  | 2 | 1.35E-05 | 0.84 | 3.04 | 0.69 | 318.9  | 1 | 13/27 |
| 3559 | S.SLQDGEFIYK.V      | 1199.59428 | -0.91108 | 2 | 1.92E-03 | 0.77 | 3.04 | 0.61 | 254.7  | 1 | 12/27 |
| 2304 | K.K#PVQLPGAYK.T     | 1214.68916 | -0.41981 | 2 | 1.45E-05 | 0.94 | 3.89 | 0.00 | 1045.0 | 1 | 15/27 |
| 1163 | L.KDGGHYDAEVK.T     | 1218.57494 | -0.35389 | 2 | 7.06E-07 | 0.90 | 3.26 | 0.62 | 691.9  | 1 | 16/30 |
| 3287 | I.FAGK#QLEDGR.T     | 1234.61745 | -0.86440 | 2 | 4.63E-03 | 0.74 | 3.45 | 0.18 | 577.4  | 1 | 14/27 |
| 3790 | R.LIFAGK#QLED.G     | 1247.66300 | 0.10623  | 2 | 1.10E-04 | 0.82 | 3.11 | 0.29 | 785.5  | 1 | 15/27 |
| 3464 | D.SSLQDGEFIYK.V     | 1286.62631 | 0.15845  | 2 | 3.25E-07 | 0.93 | 3.06 | 0.69 | 896.9  | 1 | 17/30 |
| 1540 | K.KTM*GWEASTER.M    | 1311.59978 | -0.17514 | 3 | 3.26E-01 | 0.76 | 3.25 | 0.51 | 286.4  | 1 | 22/60 |
| 1242 | K.LKDGGHYDAEVK.T    | 1331.65901 | -0.20027 | 2 | 5.72E-07 | 0.95 | 4.25 | 0.68 | 927.3  | 1 | 17/33 |
| 3224 | R.LIFAGKQLEDGR.T    | 1346.74268 | -0.50847 | 2 | 2.78E-05 | 0.96 | 3.66 | 0.65 | 1260.3 | 1 | 20/33 |
| 2256 | R.GTNFSDGPVM*QK.K   | 1393.64165 | -0.43603 | 2 | 1.74E-07 | 0.93 | 3.98 | 0.70 | 597.1  | 1 | 18/36 |
| 2943 | Y.VKHPADIPDYLK.L    | 1395.76308 | -1.05785 | 3 | 7.97E-01 | 0.68 | 3.13 | 0.53 | 362.0  | 1 | 17/66 |
| 1268 | I.QDKEGIPPDQQR.L    | 1410.69718 | 0.09294  | 2 | 5.76E-02 | 0.55 | 2.36 | 0.46 | 223.0  | 1 | 14/33 |
| 1543 | K.K#TM*GWEASTER.M   | 1425.64268 | 0.81699  | 2 | 1.56E-05 | 0.92 | 3.23 | 0.00 | 550.0  | 1 | 16/30 |
| 3505 | N.EDYTIVEQYER.A     | 1444.65907 | -0.31033 | 2 | 3.34E-08 | 0.94 | 3.69 | 0.77 | 572.1  | 1 | 16/30 |
| 1284 | K.LK#DGGHYDAEVK.T   | 1445.70191 | -0.58951 | 3 | 2.78E-01 | 0.42 | 3.01 | 0.47 | 495.4  | 1 | 24/66 |
| 2871 | R.MYPEDGALKGEIK.M   | 1450.72464 | -0.57898 | 2 | 1.75E-02 | 0.49 | 2.59 | 0.40 | 167.1  | 1 | 14/36 |
| 2658 | R.HSTGAENLYFQGH.M   | 1460.65532 | 0.25326  | 2 | 5.61E-07 | 0.95 | 3.91 | 0.88 | 470.2  | 1 | 19/36 |
| 3354 | R.LIFAGK#QLEDGR.T   | 1460.78558 | -0.17102 | 2 | 1.58E-07 | 0.86 | 3.79 | 0.37 | 464.5  | 1 | 17/33 |
| 2516 | R.M*YPEDGALKGEIK.M  | 1466.71956 | 3.14052  | 2 | 6.63E-04 | 0.93 | 3.51 | 0.77 | 611.4  | 1 | 19/36 |
| 2441 | Q.LEDGRTLSYNIQ.K    | 1523.73363 | 2.28450  | 2 | 1.84E-01 | 0.06 | 2.01 | 0.21 | 59.9   | 1 | 8/36  |
| 1715 | K.IQDKEGIPPDQQR.L   | 1523.78125 | 0.19403  | 2 | 7.48E-08 | 0.93 | 4.22 | 0.56 | 525.6  | 1 | 20/36 |
| 3519 | T.QDSSLQDGEFIYK.V   | 1529.71183 | 0.64526  | 2 | 1.04E-04 | 0.92 | 3.38 | 0.84 | 460.4  | 1 | 17/36 |
| 2514 | K.KPVQLPGAYKTDIK.L  | 1557.89990 | -0.12762 | 2 | 1.82E-06 | 0.91 | 3.47 | 0.73 | 476.1  | 1 | 18/39 |
| 2588 | R.M*YPEDGALK#GEIK.M | 1580.76246 | -1.83035 | 2 | 3.58E-02 | 0.40 | 2.97 | 0.03 | 315.2  | 1 | 16/36 |
| 2659 | R.HSTGAENLYFQGHM*.C | 1607.69072 | 0.07561  | 2 | 8.80E-11 | 0.89 | 3.32 | 0.77 | 391.0  | 1 | 17/39 |
| 3237 | K.AYVKHPADIPDYLK.L  | 1629.86352 | -0.79905 | 3 | 4.05E-08 | 0.97 | 4.62 | 0.74 | 1695.6 | 1 | 36/78 |
| 1311 | K.IQDK#EGIPPDQQR.L  | 1637.82415 | -0.29923 | 2 | 6.20E-05 | 0.60 | 3.40 | 0.59 | 424.6  | 1 | 18/36 |
| 2152 | K.LRGTFPSDGPVM*QK.K | 1662.82682 | -1.50799 | 3 | 9.49E-04 | 0.95 | 4.37 | 0.86 | 775.7  | 1 | 30/84 |
| 2592 | K.KPVQLPGAYK#TDIK.L | 1671.94280 | -0.56041 | 3 | 1.25E-07 | 0.59 | 3.84 | 0.12 | 288.5  | 1 | 24/78 |
| 1236 | K.AKIQDKEGIPPDQQR.L | 1722.91332 | 1.09459  | 2 | 6.28E-09 | 0.95 | 4.08 | 0.84 | 596.8  | 1 | 20/42 |
| 3596 | T.VTQDSSLQDGEFIYK.V | 1729.82792 | -1.19561 | 2 | 8.43E-08 | 0.94 | 4.10 | 0.64 | 869.7  | 1 | 18/42 |

|      |                                   |            |          |   |          |      |      |      |        |   |        |
|------|-----------------------------------|------------|----------|---|----------|------|------|------|--------|---|--------|
| 3256 | K.AYVK#HPADIPDYLK.L               | 1743.90642 | -0.46238 | 3 | 5.60E-06 | 0.85 | 4.61 | 0.34 | 391.9  | 1 | 25/78  |
| 2942 | K.QLEDGRTLSDYNIQK.E               | 1779.88717 | -1.57041 | 3 | 3.37E-02 | 0.26 | 2.65 | 0.29 | 142.5  | 1 | 15/84  |
| 3248 | T.SHNEDYTIVEQYER.A                | 1782.79293 | 0.86843  | 2 | 1.51E-09 | 0.97 | 4.73 | 0.79 | 1346.5 | 1 | 20/39  |
| 3916 | K.TITLEVEPSDTIENVK.A              | 1787.92730 | -0.93338 | 3 | 7.96E-06 | 0.94 | 4.20 | 0.77 | 824.2  | 1 | 32/90  |
| 1911 | K.LRGTNFSPDGPVM*QKK.T             | 1790.92178 | 1.02387  | 3 | 2.88E-02 | 0.88 | 3.76 | 0.73 | 386.0  | 1 | 24/90  |
| 2307 | K.TTYM*AKKPVQLPGAYK.T             | 1811.97242 | 0.34967  | 3 | 6.62E-05 | 0.68 | 3.16 | 0.56 | 233.5  | 1 | 19/90  |
| 3386 | D.ITSHNEDYTIVEQYER.A              | 1996.92468 | -1.59919 | 3 | 5.84E-06 | 0.82 | 3.43 | 0.66 | 418.0  | 1 | 20/90  |
| 2828 | R.M*EGSVNGHEFEIEGEGEGR.P          | 2078.87199 | -0.70988 | 3 | 7.54E-10 | 0.95 | 4.76 | 0.74 | 945.0  | 1 | 33/108 |
| 3605 | K.TITLEVEPSDTIENVK#AK.I           | 2101.10228 | 0.08246  | 3 | 2.27E-02 | 0.35 | 2.77 | 0.69 | 610.4  | 1 | 25/102 |
| 4135 | G.VJVTVTQDSSLQDGEFIYK.V           | 2143.05533 | -0.96006 | 2 | 4.47E-09 | 0.97 | 4.29 | 0.00 | 1454.7 | 1 | 26/51  |
| 3981 | K.LDITSHNEDYTIVEQYER.A            | 2225.03568 | 0.88219  | 2 | 1.08E-14 | 0.94 | 3.69 | 0.68 | 903.8  | 1 | 22/51  |
| 3895 | K.TLTGKTITLEVEPSDTIENVK.A         | 2288.22315 | -1.00050 | 3 | 4.01E-06 | 0.94 | 4.71 | 0.60 | 943.0  | 1 | 34/120 |
| 3900 | K.TLTGK#TITLEVEPSDTIENVK.A        | 2402.26605 | -0.06054 | 3 | 1.40E-12 | 0.94 | 5.37 | 0.03 | 1608.3 | 1 | 44/120 |
| 4588 | R.VM*NFEDGGVVTVTQDSSLQDGEFIYK.V   | 2894.34005 | -0.24964 | 3 | 2.88E-08 | 0.85 | 3.11 | 0.80 | 397.8  | 1 | 26/150 |
| 2889 | R.M*EGSVNGHEFEIEGEGEGRPYEGTQTAK.L | 3054.33815 | -1.39823 | 4 | 3.96E-07 | 0.80 | 3.46 | 0.55 | 379.5  | 1 | 35/243 |

| Reference | S21-E2D4-40          |            |              |   | P (pro)  | Sf    | Score  | Coverage | MW      | Accession | Peptide (Hits)  |
|-----------|----------------------|------------|--------------|---|----------|-------|--------|----------|---------|-----------|-----------------|
| Scan(s)   | Peptide              | MH+        | DeltaM (ppm) | z | P (pep)  | Sf    | XC     | DeltaCn  | Sp      | RSp       | Ions            |
| 1         | RFP_UB_new           |            |              |   | 3.09E-13 | 58.16 | 690.29 | 71.50    | 38172.1 |           | 70 (65 5 0 0 0) |
| 3636      | P.ADIPDYLK.L         | 934.48802  | -2.09063     | 2 | 3.02E-06 | 0.35  | 2.32   | -        | 299.3   | 1         | 13/21           |
| 3438      | K.AYVK#HPADIPDYLK.L  | 1743.90642 | -2.24734     | 3 | 1.32E-06 | 0.63  | 3.70   | 0.28     | 227.1   | 1         | 21/78           |
| 1213      | K.DGGHYDAEVK.T       | 1090.47998 | -0.62641     | 2 | 1.99E-07 | 0.94  | 2.94   | 0.74     | 908.4   | 1         | 19/27           |
| 3788      | N.EJDYTIVEQYER.A     | 1558.70197 | -0.16520     | 2 | 2.12E-09 | 0.98  | 4.14   | 0.00     | 1938.8  | 1         | 23/30           |
| 3723      | N.EDYTIVEQYER.A      | 1444.65907 | -1.49330     | 2 | 1.13E-06 | 0.94  | 3.55   | 0.84     | 559.0   | 1         | 16/30           |
| 4660      | K.ESTLHLVLR.L        | 1067.62077 | -2.05302     | 2 | 5.27E-09 | 0.47  | 3.34   | -        | 213.5   | 1         | 13/24           |
| 3512      | I.FAGK#QLEDGR.T      | 1234.61745 | -0.66666     | 2 | 2.27E-04 | 0.70  | 3.35   | 0.18     | 582.6   | 1         | 13/27           |
| 1880      | N.FPSDGPVM*QK.K      | 1121.52958 | -2.27522     | 2 | 6.09E-02 | 0.88  | 3.01   | 0.65     | 441.9   | 1         | 16/27           |
| 1124      | D.GALKGEIK.M         | 815.49853  | -1.35653     | 2 | 1.46E-02 | 0.36  | 2.46   | -        | 463.8   | 1         | 12/21           |
| 915       | G.GHYDAEVK.T         | 918.43157  | -1.33548     | 2 | 5.70E-02 | 0.86  | 2.65   | 0.67     | 400.4   | 1         | 13/21           |
| 2429      | R.GTNFSPDGPVM*QK.K   | 1393.64165 | -0.69881     | 2 | 2.12E-06 | 0.94  | 4.35   | 0.71     | 507.2   | 1         | 18/36           |
| 2811      | R.GTNFSPDGPVMQK.K    | 1377.64673 | -0.31841     | 2 | 1.39E-09 | 0.92  | 3.76   | 0.69     | 522.1   | 1         | 18/36           |
| 1896      | R.GTNFSPDGPVM*QK#K.T | 1635.77951 | -1.93741     | 3 | 9.01E-02 | 0.20  | 2.54   | 0.73     | 337.4   | 1         | 22/78           |
| 1014      | H.HASSEDVIK.E        | 985.49490  | -1.52791     | 2 | 2.43E-03 | 0.81  | 2.81   | 0.78     | 212.7   | 1         | 11/24           |
| 6782      | K.HPADIPDYLK.L       | 1168.59970 | -1.49917     | 2 | 1.53E-07 | 0.89  | 2.96   | 0.92     | 190.1   | 1         | 14/27           |
| 2912      | R.HSTGAENLYFQGH.M    | 1460.65532 | -0.16460     | 2 | 4.29E-07 | 0.93  | 4.20   | 0.74     | 349.5   | 1         | 18/36           |
| 1123      | G.HYDAEVK.T          | 861.41011  | -0.03076     | 2 | 6.71E-03 | 0.73  | 2.05   | 0.55     | 381.4   | 1         | 11/18           |
| 1483      | K.IQDKEGIPPDQQR.L    | 1523.78125 | -0.84740     | 2 | 2.12E-07 | 0.95  | 4.23   | 0.63     | 745.8   | 1         | 23/36           |

|      |                                   |            |          |   |          |      |      |      |        |   |        |
|------|-----------------------------------|------------|----------|---|----------|------|------|------|--------|---|--------|
| 1240 | L.KDGGHYDAEVK.T                   | 1218.57494 | -1.21641 | 3 | 9.85E-04 | 0.81 | 3.23 | 0.79 | 271.8  | 1 | 17/60  |
| 2440 | K.KJPVQLPGAYK.T                   | 1214.68916 | -1.22378 | 2 | 1.67E-06 | 0.95 | 3.59 | 0.55 | 1359.9 | 1 | 16/27  |
| 2440 | K.K#PVQLPGAYK.T                   | 1214.68916 | -1.22378 | 2 | 1.67E-06 | 0.95 | 3.59 | 0.00 | 1359.9 | 1 | 16/27  |
| 3757 | K.KPVQLPGAYK.T                    | 1100.64626 | -1.85667 | 2 | 9.29E-04 | 0.67 | 3.22 | 0.55 | 159.7  | 1 | 10/27  |
| 2210 | K.KTMGWEASTER.M                   | 1295.60486 | -0.53111 | 2 | 5.07E-06 | 0.93 | 3.64 | 0.71 | 576.6  | 1 | 17/30  |
| 1623 | K.KTM*GWEASTER.M                  | 1311.59978 | -0.65350 | 2 | 6.25E-05 | 0.93 | 3.91 | 0.79 | 279.7  | 1 | 16/30  |
| 1648 | K.K#TM*GWEASTER.M                 | 1425.64268 | -0.80988 | 2 | 1.28E-03 | 0.92 | 3.35 | 0.72 | 653.2  | 1 | 15/30  |
| 1687 | K.LDITSHN.E                       | 799.39446  | -0.23085 | 2 | 4.70E-03 | 0.85 | 2.13 | 0.68 | 502.0  | 1 | 12/18  |
| 4183 | K.LDITSHNEDYTIVEQYER.A            | 2225.03568 | -1.12633 | 3 | 9.68E-08 | 0.96 | 5.01 | 0.87 | 796.0  | 1 | 27/102 |
| 3497 | R.LIFAGK#QLEDGR.T                 | 1460.78558 | -1.17379 | 2 | 4.07E-06 | 0.75 | 3.62 | 0.25 | 459.9  | 1 | 15/33  |
| 1346 | K.LK#DGGHYDAEVK.T                 | 1445.70191 | -1.31903 | 2 | 1.36E-05 | 0.93 | 3.95 | 0.00 | 676.0  | 1 | 16/33  |
| 1346 | K.LJKDGGHYDAEVK.T                 | 1445.70191 | -1.31903 | 2 | 1.92E-04 | 0.93 | 3.95 | 0.71 | 676.0  | 1 | 16/33  |
| 1230 | K.LKDGGHYDAEVK.T                  | 1331.65901 | -1.48362 | 2 | 2.42E-08 | 0.95 | 3.90 | 0.62 | 1081.8 | 1 | 19/33  |
| 2367 | K.LRGTNFPDGPVM*QK.K               | 1662.82682 | -1.28776 | 3 | 9.11E-06 | 0.90 | 3.07 | 0.79 | 705.8  | 1 | 30/84  |
| 2412 | T.LSDYNIQK.E                      | 980.50474  | -0.67414 | 2 | 1.90E-03 | 0.79 | 2.99 | 0.57 | 257.4  | 1 | 11/21  |
| 4609 | K.LSFPEGFK.W                      | 924.48254  | -1.99621 | 2 | 7.34E-04 | 0.91 | 2.38 | 0.86 | 482.0  | 1 | 14/21  |
| 2995 | R.M*EGSVNGHEFEIEGEGEGR.P          | 2078.87199 | -1.23836 | 3 | 3.09E-13 | 0.98 | 5.80 | 0.81 | 1458.2 | 1 | 35/108 |
| 3303 | R.MEGSVNGHEFEIEGEGEGR.P           | 2062.87707 | -0.92933 | 3 | 1.70E-05 | 0.95 | 4.58 | 0.77 | 835.0  | 1 | 31/108 |
| 3050 | R.M*EGSVNGHEFEIEGEGEGRPYEGTQTAK.L | 3054.33815 | -2.43735 | 4 | 1.71E-07 | 0.95 | 5.05 | 0.92 | 624.6  | 1 | 41/243 |
| 3708 | R.MEGSVNGHEFEIEGEGEGRPYEGTQTAK.L  | 3038.34323 | -1.30978 | 4 | 3.61E-09 | 0.89 | 3.84 | 0.84 | 338.3  | 1 | 35/243 |
| 2230 | R.M*YPEDGALK.G                    | 1039.47648 | -1.40021 | 2 | 7.15E-03 | 0.80 | 2.34 | 0.65 | 308.7  | 1 | 14/24  |
| 2560 | R.MYPEDGALK.G                     | 1023.48156 | -1.85329 | 2 | 1.35E-05 | 0.87 | 2.63 | 0.79 | 331.6  | 1 | 14/24  |
| 2578 | R.M*YPEDGALKGEIK.M                | 1466.71956 | -1.10404 | 2 | 4.50E-06 | 0.88 | 3.55 | 0.64 | 449.2  | 1 | 16/36  |
| 3061 | R.MYPEDGALKGEIK.M                 | 1450.72464 | -0.66313 | 2 | 1.60E-09 | 0.91 | 3.86 | 0.69 | 223.7  | 1 | 18/36  |
| 3300 | H.PADIPDYLK.L                     | 1031.54079 | -1.03496 | 2 | 2.60E-04 | 0.84 | 3.14 | 0.71 | 380.7  | 1 | 11/24  |
| 2305 | K.PVQLPGAYK.T                     | 972.55129  | -3.36429 | 2 | 8.52E-05 | 0.83 | 2.40 | 0.53 | 601.7  | 1 | 15/24  |
| 853  | R.PYEGTQTAK.L                     | 994.48400  | -1.78599 | 2 | 1.23E-02 | 0.74 | 2.56 | 0.59 | 337.2  | 1 | 12/24  |
| 3734 | T.QDSSLQDGEFIYK.V                 | 1529.71183 | -1.03053 | 2 | 7.76E-06 | 0.91 | 3.17 | 0.83 | 461.2  | 1 | 17/36  |
| 1412 | L.SDYNIQK.E                       | 867.42067  | -1.23319 | 2 | 3.65E-02 | 0.86 | 2.47 | 0.65 | 399.0  | 1 | 12/18  |
| 3443 | T.SHNEDYTIVEQYER.A                | 1782.79293 | -1.87042 | 2 | 3.82E-13 | 0.98 | 5.15 | 0.84 | 1443.3 | 1 | 21/39  |
| 3773 | S.SLQDGEFIYK.V                    | 1199.59428 | -2.13220 | 2 | 1.34E-03 | 0.90 | 3.20 | 0.64 | 568.2  | 1 | 15/27  |
| 3674 | D.SSLQDGEFIYK.V                   | 1286.62631 | -1.35957 | 2 | 2.84E-08 | 0.92 | 3.01 | 0.70 | 805.0  | 1 | 17/30  |
| 3591 | E.STLHLVLR.L                      | 938.57818  | -1.30489 | 2 | 2.67E-05 | 0.72 | 2.98 | -    | 664.1  | 1 | 15/21  |
| 4166 | K.TITLEVEPSDTIENVK.A              | 1787.92730 | -1.34303 | 3 | 2.04E-08 | 0.92 | 4.21 | 0.73 | 530.3  | 1 | 25/90  |
| 3590 | S.TLHLVLR.L                       | 851.54615  | -1.52761 | 2 | 8.14E-04 | 0.64 | 2.20 | -    | 454.6  | 1 | 15/18  |
| 5410 | R.TLSDYNIQK.E                     | 1081.55242 | -2.14409 | 2 | 3.55E-01 | 0.92 | 2.95 | 0.88 | 425.8  | 1 | 15/24  |
| 4148 | K.TJLTGKTITLEVEPSDTIENVK.A        | 2402.26605 | -1.68101 | 2 | 1.11E-07 | 0.87 | 5.16 | 0.03 | 794.8  | 1 | 21/60  |

|      |                                 |            |          |   |          |      |      |      |        |   |        |
|------|---------------------------------|------------|----------|---|----------|------|------|------|--------|---|--------|
| 4390 | K.TLTGK#TITLEVEPSDTIENVK.A      | 2402.26605 | -0.97520 | 3 | 1.50E-03 | 0.84 | 5.31 | 0.62 | 752.5  | 1 | 31/120 |
| 2879 | K.TMGWEASTER.M                  | 1167.50990 | -1.32787 | 2 | 1.27E-04 | 0.91 | 3.34 | 0.44 | 878.3  | 1 | 17/27  |
| 2117 | K.TM*GWEASTER.M                 | 1183.50482 | -1.24646 | 2 | 5.05E-07 | 0.97 | 3.53 | 0.97 | 1005.1 | 1 | 19/27  |
| 2294 | G.TJNFPDGPVM*QK.K               | 1450.66308 | -1.05893 | 2 | 3.11E-07 | 0.89 | 3.24 | 0.64 | 520.1  | 1 | 17/33  |
| 4890 | R.VM*NFEDGGVVTVTQDSSLQDGEFIYK.V | 2894.34005 | -0.88227 | 3 | 8.23E-12 | 0.96 | 5.52 | 0.82 | 850.3  | 1 | 32/150 |
| 5246 | R.VMNFEDGGVVTVTQDSSLQDGEFIYK.V  | 2878.34513 | -3.60163 | 2 | 4.09E-09 | 0.78 | 2.62 | 0.75 | 303.6  | 1 | 18/75  |
| 2675 | P.VQLPGAYK.T                    | 875.49853  | -0.49670 | 2 | 5.07E-04 | 0.79 | 2.19 | 0.94 | 201.8  | 1 | 10/21  |
| 3823 | T.VTQDSSLQDGEFIYK.V             | 1729.82792 | -1.05447 | 2 | 9.12E-11 | 0.91 | 3.38 | 0.64 | 703.5  | 1 | 19/42  |
| 2628 | M.YPEDGALKGEIK.M                | 1319.68416 | -0.23966 | 3 | 1.18E-03 | 0.76 | 2.60 | 0.67 | 397.9  | 1 | 23/66  |

| Reference | S22-E2T-20             |            |              |   | P (pro)  | Sf    | Score  | Coverage | MW      | Accession | Peptide (Hits)  |
|-----------|------------------------|------------|--------------|---|----------|-------|--------|----------|---------|-----------|-----------------|
| Scan(s)   | Peptide                | MH+        | DeltaM (ppm) | z | P (pep)  | Sf    | XC     | DeltaCn  | Sp      | RSp       | Ions            |
| 1         | RFP_UB_new             |            |              |   | 1.08E-14 | 63.71 | 768.26 | 77.40    | 38172.1 |           | 77 (76 1 0 0 0) |
| 3431      | P.ADIPDYLK.L           | 934.48802  | -2.61314     | 2 | 4.61E-02 | 0.58  | 2.60   | -        | 389.5   | 1         | 15/21           |
| 1836      | K.AKIQDKEGIPPDQQR.L    | 1722.91332 | -2.56205     | 3 | 5.27E-03 | 0.67  | 2.76   | 0.55     | 342.7   | 1         | 22/84           |
| 3242      | K.AYVKHPADIPDYLK.L     | 1629.86352 | -2.03484     | 3 | 4.37E-07 | 0.96  | 4.73   | 0.72     | 1255.2  | 1         | 31/78           |
| 1073      | K.DGGHYDAEVK.T         | 1090.47998 | -2.64137     | 2 | 7.66E-07 | 0.96  | 2.91   | 0.80     | 1082.1  | 1         | 20/27           |
| 3521      | N.EDYTIVEQYER.A        | 1444.65907 | -2.08478     | 2 | 8.71E-07 | 0.93  | 2.93   | 0.85     | 618.2   | 1         | 17/30           |
| 3589      | N.EJDYTIVEQYER.A       | 1558.70197 | -0.32183     | 2 | 4.44E-09 | 0.97  | 3.65   | 0.00     | 1635.9  | 1         | 21/30           |
| 1592      | F.EIEGEGEGRPYEGTQTAK.L | 1950.90394 | -3.74152     | 3 | 4.08E-04 | 0.73  | 2.88   | 0.55     | 412.6   | 1         | 26/102          |
| 4456      | K.ESTLHLVLR.L          | 1067.62077 | -2.62471     | 2 | 2.24E-08 | 0.66  | 3.41   | -        | 288.6   | 1         | 16/24           |
| 3343      | I.FAGK#QLEDGR.T        | 1234.61745 | -1.85313     | 2 | 1.83E-03 | 0.51  | 3.04   | 0.02     | 466.0   | 1         | 14/27           |
| 1747      | N.FPSDGPVM*QK.K        | 1121.52958 | -2.38406     | 2 | 5.39E-03 | 0.87  | 2.76   | 0.66     | 520.1   | 1         | 15/27           |
| 1010      | D.GALKGEIK.M           | 815.49853  | -2.25466     | 2 | 3.78E-03 | 0.35  | 2.38   | -        | 474.1   | 1         | 12/21           |
| 825       | G.GHYDAEVK.T           | 918.43157  | -2.99688     | 2 | 3.13E-02 | 0.78  | 2.44   | 0.61     | 319.7   | 1         | 12/21           |
| 2773      | R.GTNFSPDGPVMQK.K      | 1377.64673 | -2.17917     | 2 | 5.70E-11 | 0.95  | 4.58   | 0.70     | 586.6   | 1         | 19/36           |
| 2800      | R.GTNFSPDGPVM*QK.K     | 1393.64165 | -1.92508     | 2 | 5.09E-08 | 0.95  | 4.49   | 0.59     | 788.9   | 1         | 20/36           |
| 903       | H.HASESDVIK.E          | 985.49490  | -3.57172     | 2 | 6.08E-05 | 0.94  | 3.31   | 0.72     | 626.2   | 1         | 17/24           |
| 5936      | K.HPADIPDYLK.L         | 1168.59970 | -2.96159     | 2 | 1.05E-05 | 0.78  | 2.87   | 0.74     | 113.3   | 1         | 12/27           |
| 3291      | K.HJPADIPDYLK.L        | 1282.64260 | -3.02535     | 2 | 3.54E-01 | 0.38  | 2.17   | 0.61     | 141.2   | 1         | 8/27            |
| 2644      | R.HSTGAENLYFQGH.M      | 1460.65532 | -2.25390     | 2 | 2.76E-08 | 0.95  | 3.86   | 0.83     | 594.7   | 1         | 20/36           |
| 2633      | R.HSTGAENLYFQGHM*.C    | 1607.69072 | -3.53938     | 3 | 4.82E-03 | 0.79  | 3.20   | 0.70     | 325.4   | 1         | 19/78           |
| 1013      | G.HYDAEVK.T            | 861.41011  | -1.58957     | 2 | 1.76E-02 | 0.89  | 2.68   | 0.42     | 772.2   | 1         | 14/18           |
| 1961      | K.IQDKEGIPPDQQR.L      | 1523.78125 | -1.96894     | 2 | 6.98E-09 | 0.94  | 4.27   | 0.55     | 568.1   | 1         | 21/36           |
| 1121      | L.KDGGHYDAEVK.T        | 1218.57494 | -2.85826     | 2 | 8.40E-08 | 0.93  | 3.19   | 0.84     | 714.9   | 1         | 16/30           |
| 2965      | K.KPVQLPGAYK.T         | 1100.64626 | -2.52212     | 2 | 6.63E-04 | 0.88  | 3.33   | 0.65     | 302.0   | 1         | 15/27           |
| 2255      | K.K#PVQLPGAYK.T        | 1214.68916 | -3.13318     | 2 | 1.33E-04 | 0.94  | 3.40   | 0.00     | 865.2   | 1         | 19/27           |



|      |                                   |            |          |   |          |      |      |      |        |   |        |
|------|-----------------------------------|------------|----------|---|----------|------|------|------|--------|---|--------|
| 476  | G.KQLEDGR.T                       | 845.44756  | -3.10317 | 2 | 1.36E-03 | 0.52 | 2.25 | 0.33 | 298.7  | 1 | 10/18  |
| 2066 | K.KTMGWEASTER.M                   | 1295.60486 | -2.14321 | 3 | 7.11E-02 | 0.88 | 3.44 | 0.67 | 402.2  | 1 | 25/60  |
| 1479 | K.KTM*GWEASTER.M                  | 1311.59978 | -1.02578 | 2 | 7.67E-06 | 0.92 | 3.50 | 0.76 | 337.6  | 1 | 17/30  |
| 1527 | K.LDITSHN.E                       | 799.39446  | -2.13965 | 2 | 6.87E-03 | 0.82 | 2.39 | 0.55 | 449.5  | 1 | 12/18  |
| 4603 | K.LDITSHNEDYTIVEQYER.A            | 2225.03568 | -1.12633 | 3 | 1.57E-08 | 0.95 | 4.70 | 0.85 | 765.5  | 1 | 27/102 |
| 3324 | R.LIFAGK#QLEDGR.T                 | 1460.78558 | -2.59440 | 2 | 1.67E-08 | 0.94 | 4.15 | 0.41 | 851.1  | 1 | 21/33  |
| 1188 | K.LKDGGHYDAEVK.T                  | 1331.65901 | -2.03363 | 2 | 2.48E-08 | 0.95 | 4.10 | 0.66 | 995.3  | 1 | 18/33  |
| 2435 | K.LRGTFNFPDGPVM*QK.K              | 1662.82682 | -3.60021 | 3 | 1.83E-04 | 0.95 | 4.96 | 0.76 | 581.8  | 1 | 28/84  |
| 2709 | K.LRGTFNFPDGPVMQK.K               | 1646.83190 | -3.12486 | 3 | 5.86E-06 | 0.94 | 3.32 | 0.79 | 1150.2 | 1 | 33/84  |
| 5947 | K.LSFPEGFK.W                      | 924.48254  | -2.59040 | 2 | 1.29E-03 | 0.91 | 2.65 | -    | 441.8  | 1 | 12/21  |
| 2826 | R.M*EGSVNGHEFEIEGEGEGR.P          | 2078.87199 | -2.29531 | 3 | 1.83E-09 | 0.97 | 4.89 | 0.81 | 1303.9 | 1 | 34/108 |
| 3138 | R.MEGSVNGHEFEIEGEGEGRPYEGTQTAK.L  | 3038.34323 | -2.49056 | 3 | 1.08E-14 | 0.95 | 5.19 | 0.86 | 692.1  | 1 | 33/162 |
| 2890 | R.M*EGSVNGHEFEIEGEGEGRPYEGTQTAK.L | 3054.33815 | -2.35742 | 4 | 3.20E-09 | 0.94 | 5.16 | 0.81 | 602.4  | 1 | 39/243 |
| 2404 | R.MYPEDGALK.G                     | 1023.48156 | -3.64234 | 2 | 3.30E-01 | 0.73 | 2.06 | 0.75 | 259.7  | 1 | 12/24  |
| 2094 | R.M*YPEDGALK.G                    | 1039.47648 | -3.04429 | 2 | 9.26E-04 | 0.82 | 2.30 | 0.70 | 331.5  | 1 | 14/24  |
| 2366 | R.M*YPEDGALKGEIK.M                | 1466.71956 | -2.43567 | 2 | 4.37E-03 | 0.95 | 3.56 | 0.75 | 768.6  | 1 | 21/36  |
| 2819 | R.MYPEDGALKGEIK.M                 | 1450.72464 | -1.75700 | 2 | 8.10E-04 | 0.73 | 3.12 | 0.61 | 174.4  | 1 | 13/36  |
| 3614 | H.PADIPDYLK.L                     | 1031.54079 | -3.28338 | 2 | 1.31E-06 | 0.93 | 3.14 | 0.60 | 901.1  | 1 | 16/24  |
| 2602 | Y.PEDGALKGEIK.M                   | 1156.62083 | -1.73545 | 2 | 9.68E-05 | 0.94 | 3.91 | 0.48 | 986.7  | 1 | 20/30  |
| 2102 | F.PSDGPVM*QK.K                    | 974.46116  | -1.81103 | 2 | 9.13E-04 | 0.76 | 3.28 | 0.56 | 198.3  | 1 | 11/24  |
| 2762 | K.PVQLPGAYK.T                     | 972.55129  | -2.48568 | 2 | 3.46E-04 | 0.89 | 3.02 | 0.59 | 635.1  | 1 | 15/24  |
| 598  | R.PYEGTQTAK.L                     | 994.48400  | -4.36369 | 2 | 1.79E-03 | 0.89 | 2.28 | 0.69 | 669.6  | 1 | 16/24  |
| 1324 | I.QDKEGIPPDQQR.L                  | 1410.69718 | -1.98383 | 2 | 1.70E-02 | 0.51 | 2.50 | 0.49 | 185.8  | 1 | 12/33  |
| 3554 | T.QDSSLQDGEFIYK.V                 | 1529.71183 | -1.74873 | 2 | 2.24E-07 | 0.90 | 3.57 | 0.80 | 383.3  | 1 | 15/36  |
| 519  | G.RPYEGTQTAK.L                    | 1150.58511 | -2.95490 | 2 | 1.97E-04 | 0.65 | 2.40 | 0.48 | 220.4  | 1 | 14/27  |
| 1277 | L.SDYNIQK.E                       | 867.42067  | -2.28865 | 2 | 4.67E-03 | 0.90 | 2.92 | 0.66 | 508.4  | 1 | 12/18  |
| 3264 | T.SHNEDYTIVEQYER.A                | 1782.79293 | -1.80195 | 2 | 8.38E-13 | 0.96 | 4.35 | 0.78 | 1150.2 | 1 | 18/39  |
| 3492 | D.SSLQDGEFIYK.V                   | 1286.62631 | -2.02370 | 2 | 4.28E-09 | 0.94 | 3.42 | 0.86 | 792.8  | 1 | 16/30  |
| 1867 | L.SSSEHM*QIFVK.T                  | 1308.62527 | -1.84760 | 2 | 9.27E-05 | 0.87 | 2.75 | 0.85 | 291.4  | 1 | 15/30  |
| 2882 | L.SSSEHMQIFVK.T                   | 1292.63035 | -2.77849 | 2 | 2.54E-06 | 0.80 | 2.68 | 0.72 | 338.1  | 1 | 13/30  |
| 3390 | E.STLHLVLR.L                      | 938.57818  | -2.54045 | 2 | 2.06E-04 | 0.70 | 3.28 | -    | 538.9  | 1 | 14/21  |
| 5174 | K.TDIKLDITSHNEDYTIVEQYER.A        | 2682.28933 | -3.59656 | 4 | 4.35E-08 | 0.82 | 3.55 | 0.66 | 308.9  | 1 | 26/189 |
| 4972 | K.TITLEVEPSDTIENVK.A              | 1787.92730 | -1.50620 | 2 | 3.70E-11 | 0.95 | 4.33 | 0.68 | 792.3  | 1 | 24/45  |
| 3650 | K.TITLEVEPSDTIENVKAK#.I           | 2101.10228 | -1.92193 | 3 | 6.66E-05 | 0.45 | 3.20 | 0.01 | 498.8  | 1 | 28/102 |
| 3576 | S.TLHLVLR.L                       | 851.54615  | -1.88599 | 2 | 1.69E-04 | 0.40 | 2.40 | -    | 247.8  | 1 | 12/18  |
| 6025 | R.TLSDYNIQK.E                     | 1081.55242 | -2.48269 | 2 | 3.34E-03 | 0.92 | 2.92 | 0.78 | 460.6  | 1 | 16/24  |
| 3952 | K.TLTGK#TITLEVEPSDTIENVK.A        | 2402.26605 | -2.04231 | 3 | 2.83E-07 | 0.86 | 4.98 | 0.01 | 1008.8 | 1 | 36/120 |

|      |                                     |            |          |   |          |      |      |      |        |   |        |
|------|-------------------------------------|------------|----------|---|----------|------|------|------|--------|---|--------|
| 2621 | K.TMGWEASTER.M                      | 1167.50990 | -2.26888 | 2 | 3.31E-08 | 0.96 | 3.87 | 0.77 | 813.2  | 1 | 19/27  |
| 1959 | K.TM*GWEASTER.M                     | 1183.50482 | -2.07160 | 2 | 2.28E-07 | 0.96 | 3.01 | 0.96 | 961.3  | 1 | 19/27  |
| 2063 | G.TNFPSDGPVM*QK.K                   | 1336.62018 | -4.57983 | 2 | 6.16E-04 | 0.80 | 3.22 | 0.66 | 256.0  | 1 | 13/33  |
| 5007 | R.VMNFEDGGVVTQTQDSSLQDGEFIYK.V      | 2878.34513 | -1.61304 | 3 | 1.34E-03 | 0.82 | 3.16 | 0.60 | 550.1  | 1 | 28/150 |
| 4894 | R.VM*NFEDGGVVTQTQDSSLQDGEFIYK.V     | 2894.34005 | -2.02101 | 3 | 2.85E-07 | 0.95 | 5.20 | 0.77 | 635.4  | 1 | 31/150 |
| 2528 | P.VQLPGAYK.T                        | 875.49853  | -1.68185 | 2 | 3.08E-04 | 0.83 | 2.16 | 0.95 | 234.7  | 1 | 11/21  |
| 2802 | K.VRM*EGSVNGHEFEIEGEGEGRPYEGTQTAK.L | 3309.50768 | -1.76063 | 4 | 3.19E-06 | 0.82 | 3.14 | 0.77 | 263.1  | 1 | 33/261 |
| 3629 | T.VTQDSSLQDGEFIYK.V                 | 1729.82792 | -2.74810 | 2 | 1.01E-05 | 0.94 | 3.91 | 0.66 | 1018.5 | 1 | 19/42  |
| 2536 | M.YPEDGALKGEIK.M                    | 1319.68416 | -2.14883 | 2 | 3.70E-07 | 0.95 | 3.87 | 0.61 | 1041.9 | 1 | 20/33  |
| 3032 | D.YTIVEQYER.A                       | 1200.58953 | -3.35863 | 2 | 1.01E-01 | 0.91 | 3.07 | 0.62 | 711.4  | 1 | 15/24  |

| Reference | S23-E2T-40             |            |              |   | P (pro)  | Sf    | Score  | Coverage | MW      | Accession | Peptide (Hits)  |
|-----------|------------------------|------------|--------------|---|----------|-------|--------|----------|---------|-----------|-----------------|
| Scan(s)   | Peptide                | MH+        | DeltaM (ppm) | z | P (pep)  | Sf    | XC     | DeltaCn  | Sp      | RSp       | Ions            |
| 1         | RFP_UB_new             |            |              |   | 4.93E-11 | 39.46 | 488.21 | 63.50    | 38172.1 |           | 49 (48 1 0 0 0) |
| 1363      | K.AKIQDKEGIPPDQQR.L    | 1722.91332 | -1.60556     | 3 | 7.58E-08 | 0.77  | 3.34   | 0.62     | 239.8   | 1         | 21/84           |
| 3143      | K.AYVKHPADIPDYLK.L     | 1629.86352 | -1.02374     | 3 | 1.81E-06 | 0.90  | 3.73   | 0.71     | 640.1   | 1         | 25/78           |
| 1052      | K.DGGHYDAEVK.T         | 1090.47998 | -1.96971     | 2 | 3.61E-07 | 0.90  | 2.74   | 0.78     | 524.7   | 1         | 16/27           |
| 3539      | Q.DSSLQDGEFIYK.V       | 1401.65325 | -1.57173     | 2 | 3.66E-05 | 0.72  | 2.46   | 0.61     | 469.2   | 1         | 13/33           |
| 3415      | N.EDYTIVEQYER.A        | 1444.65907 | -2.08478     | 2 | 2.61E-03 | 0.78  | 2.31   | 0.85     | 257.0   | 1         | 12/30           |
| 4293      | K.ESTLHLVLR.L          | 1067.62077 | -2.39603     | 2 | 1.34E-09 | 0.90  | 2.17   | 0.98     | 295.1   | 1         | 15/24           |
| 956       | D.GALKGEIK.M           | 815.49853  | -1.28169     | 2 | 5.91E-03 | 0.56  | 2.40   | -        | 669.6   | 1         | 14/21           |
| 861       | E.GEGEGRPYEGTQTAK.L    | 1579.73469 | -1.25097     | 2 | 1.28E-04 | 0.78  | 2.62   | 0.81     | 252.4   | 1         | 15/42           |
| 866       | E.GEGRPYEGTQTAK.L      | 1393.67063 | -1.70236     | 2 | 1.08E-03 | 0.52  | 2.26   | 0.63     | 165.0   | 1         | 12/36           |
| 945       | D.GGHYDAEVK.T          | 975.45304  | -2.23737     | 2 | 2.22E-02 | 0.42  | 2.44   | 0.50     | 522.2   | 2         | 14/24           |
| 948       | G.GHYDAEVK.T           | 918.43157  | -1.80067     | 2 | 1.41E-02 | 0.71  | 2.50   | 0.42     | 426.2   | 1         | 12/21           |
| 1893      | R.GTNFSPDGPVM*QK.K     | 1393.64165 | 1.31578      | 2 | 2.99E-10 | 0.95  | 4.11   | 0.76     | 659.3   | 1         | 19/36           |
| 2524      | R.GTNFSPDGPVMQK.K      | 1377.64673 | -0.49562     | 2 | 1.45E-08 | 0.93  | 4.03   | 0.69     | 466.7   | 1         | 18/36           |
| 4612      | K.HPADIPDYLK.L         | 1168.59970 | -1.70808     | 2 | 3.19E-10 | 0.84  | 2.58   | 0.83     | 206.8   | 1         | 14/27           |
| 1799      | K.IQDKEGIPPDQQR.L      | 1523.78125 | -1.40817     | 2 | 4.93E-11 | 0.95  | 4.11   | 0.63     | 670.0   | 1         | 22/36           |
| 1070      | L.KDGGHYDAEVK.T        | 1218.57494 | -1.65616     | 2 | 2.13E-04 | 0.83  | 3.02   | 0.66     | 466.2   | 1         | 13/30           |
| 2175      | K.KPVQLPGAYK.T         | 1100.64626 | -2.63303     | 2 | 1.65E-06 | 0.84  | 3.03   | 0.61     | 312.2   | 1         | 15/27           |
| 1905      | K.KTMGWEASTER.M        | 1295.60486 | -1.00221     | 2 | 1.50E-06 | 0.83  | 2.54   | 0.86     | 315.3   | 1         | 13/30           |
| 1374      | K.KTM*GWEASTER.M       | 1311.59978 | -1.30499     | 2 | 2.43E-05 | 0.90  | 3.12   | 0.75     | 317.1   | 1         | 17/30           |
| 3874      | K.LDITSHNEDYTIVEQYER.A | 2225.03568 | -0.96174     | 3 | 2.97E-08 | 0.92  | 3.98   | 0.82     | 612.7   | 1         | 26/102          |
| 2913      | T.LEVEPSDTIENVK.A      | 1472.74788 | -0.68339     | 2 | 2.52E-09 | 0.90  | 3.19   | 0.57     | 635.6   | 1         | 21/36           |
| 1114      | K.LKDGGHYDAEVK.T       | 1331.65901 | -1.48362     | 2 | 2.01E-07 | 0.96  | 4.04   | 0.69     | 1298.8  | 1         | 21/33           |
| 2545      | K.LRGTNFSPDGPVMQK.K    | 1646.83190 | -1.81952     | 2 | 4.89E-09 | 0.82  | 2.93   | 0.77     | 311.2   | 1         | 15/42           |

|      |                                 |            |          |   |          |      |      |      |       |   |        |
|------|---------------------------------|------------|----------|---|----------|------|------|------|-------|---|--------|
| 2109 | K.LRGTNFSPDGPVM*QK.K            | 1662.82682 | -0.94932 | 2 | 2.77E-07 | 0.83 | 2.39 | 0.82 | 330.3 | 1 | 18/42  |
| 2096 | T.LSDYNIQK.E                    | 980.50474  | -0.98538 | 2 | 4.41E-03 | 0.83 | 2.74 | 0.56 | 350.8 | 1 | 13/21  |
| 4024 | K.LSFPEGFK.W                    | 924.48254  | -1.13794 | 2 | 7.76E-05 | 0.65 | 2.08 | 0.88 | 172.4 | 1 | 8/21   |
| 3568 | R.MEGSVNGHEFEIE.G               | 1477.62638 | -1.48337 | 2 | 7.42E-08 | 0.91 | 3.38 | 0.81 | 557.4 | 1 | 16/36  |
| 3168 | R.M*EGSVNGHEFEIE.G              | 1493.62130 | -1.58064 | 2 | 4.32E-05 | 0.92 | 3.50 | -    | 334.2 | 1 | 15/36  |
| 2667 | R.M*EGSVNGHEFEIEGEGEGR.P        | 2078.87199 | -0.62180 | 3 | 7.78E-06 | 0.90 | 3.60 | 0.63 | 843.8 | 1 | 29/108 |
| 1820 | R.M*YPEDGALK.G                  | 1039.47648 | -2.10481 | 2 | 8.33E-04 | 0.82 | 2.30 | 0.64 | 349.3 | 1 | 15/24  |
| 2345 | R.M*YPEDGALKGEIK.M              | 1466.71956 | -1.52018 | 2 | 6.34E-06 | 0.88 | 2.84 | 0.77 | 457.3 | 1 | 17/36  |
| 2750 | R.MYPEDGALKGEIK.M               | 1450.72464 | -1.25214 | 2 | 2.97E-06 | 0.74 | 2.63 | 0.74 | 144.6 | 1 | 14/36  |
| 3017 | H.PADIPDYLK.L                   | 1031.54079 | -1.98167 | 2 | 1.58E-03 | 0.87 | 2.95 | 0.67 | 517.7 | 1 | 13/24  |
| 2352 | Y.PEDGALKGEIK.M                 | 1156.62083 | -4.37397 | 2 | 1.19E-03 | 0.71 | 3.22 | 0.42 | 327.6 | 1 | 13/30  |
| 2007 | K.PVQLPGAYK.T                   | 972.55129  | -1.73259 | 2 | 3.17E-04 | 0.86 | 2.63 | 0.64 | 557.8 | 1 | 14/24  |
| 3432 | T.QDSSLQDGEFIYK.V               | 1529.71183 | -1.34973 | 2 | 5.48E-06 | 0.78 | 2.69 | 0.81 | 229.5 | 1 | 13/36  |
| 2806 | K.QLEDGRTLSDYNIQK.E             | 1779.88717 | -0.95316 | 3 | 4.56E-02 | 0.74 | 3.49 | 0.64 | 184.9 | 1 | 16/84  |
| 3474 | S.SLQDGEFIYK.V                  | 1199.59428 | -2.13220 | 2 | 1.28E-05 | 0.74 | 2.59 | 0.61 | 355.5 | 1 | 12/27  |
| 3377 | D.SSLQDGEFIYK.V                 | 1286.62631 | -1.45445 | 2 | 8.57E-07 | 0.87 | 2.56 | 0.60 | 792.9 | 1 | 16/30  |
| 3309 | E.STLHLVLR.L                    | 938.57818  | -0.97974 | 2 | 1.79E-05 | 0.59 | 2.60 | -    | 599.4 | 1 | 14/21  |
| 3932 | K.TITLEVEPSDTIENVK.A            | 1787.92730 | 0.33722  | 2 | 9.91E-08 | 0.94 | 3.36 | 0.71 | 834.9 | 1 | 25/45  |
| 3308 | S.TLHLVLR.L                     | 851.54615  | -1.31259 | 2 | 5.61E-04 | 0.39 | 2.26 | -    | 299.5 | 1 | 12/18  |
| 2260 | R.TLSYNIQK.E                    | 1081.55242 | -1.91836 | 2 | 1.69E-07 | 0.91 | 2.94 | 0.84 | 362.5 | 1 | 15/24  |
| 1798 | K.TM*GWEASTER.M                 | 1183.50482 | -1.65903 | 2 | 1.54E-08 | 0.96 | 3.10 | 0.92 | 881.6 | 1 | 18/27  |
| 2460 | K.TMGWEASTER.M                  | 1167.50990 | -1.11876 | 2 | 2.96E-07 | 0.94 | 3.54 | 0.73 | 671.5 | 1 | 17/27  |
| 4478 | R.VM*NFEDGGVVTVTQDSSLQDGEFIYK.V | 2894.34005 | -0.31290 | 3 | 2.73E-08 | 0.88 | 3.45 | 0.74 | 537.0 | 1 | 31/150 |
| 2885 | D.YTIVEQYER.A                   | 1200.58953 | -2.24020 | 2 | 2.50E-05 | 0.87 | 2.80 | 0.69 | 448.1 | 1 | 13/24  |

| Reference | S24-E2T-80          |            |              |   | P (pro)  | Sf    | Score  | Coverage | MW      | Accession | Peptide (Hits)  |
|-----------|---------------------|------------|--------------|---|----------|-------|--------|----------|---------|-----------|-----------------|
| Scan(s)   | Peptide             | MH+        | DeltaM (ppm) | z | P (pep)  | Sf    | XC     | DeltaCn  | Sp      | RSp       | Ions            |
| 1         | RFP_UB_new          |            |              |   | 1.89E-14 | 42.45 | 538.28 | 62.90    | 38172.1 |           | 54 (53 1 0 0 0) |
| 3838      | P.ADIPDYLK.L        | 934.48802  | -0.91498     | 2 | 3.78E-07 | 0.21  | 2.31   | -        | 231.9   | 1         | 11/21           |
| 1394      | K.AKIQDKEGIPPDQQR.L | 1722.91332 | -0.75535     | 3 | 1.20E-06 | 0.79  | 3.16   | 0.66     | 284.4   | 1         | 24/84           |
| 1255      | K.DGGHYDAEVK.T      | 1090.47998 | -1.18612     | 2 | 6.09E-08 | 0.93  | 2.88   | 0.73     | 762.1   | 1         | 18/27           |
| 3905      | N.EDYTIVEQYER.A     | 1444.65907 | -1.32430     | 2 | 6.03E-08 | 0.91  | 2.81   | 0.78     | 614.2   | 1         | 16/30           |
| 4704      | K.ESTLHLVLR.L       | 1067.62077 | -1.48132     | 2 | 2.59E-09 | 0.35  | 2.85   | -        | 199.0   | 1         | 13/24           |
| 1224      | D.GALKGEIK.M        | 815.49853  | -0.30872     | 2 | 4.23E-03 | 0.24  | 2.69   | -        | 325.2   | 1         | 10/21           |
| 1070      | G.GHYDAEVK.T        | 918.43157  | -1.60130     | 2 | 4.88E-04 | 0.88  | 2.05   | 0.65     | 695.5   | 1         | 15/21           |
| 2602      | R.GTNFSPDGPVM*QK.K  | 1393.64165 | -0.43603     | 2 | 7.08E-09 | 0.94  | 3.77   | 0.83     | 623.1   | 1         | 18/36           |
| 2910      | R.GTNFSPDGPVMQK.K   | 1377.64673 | -1.02727     | 2 | 2.32E-08 | 0.90  | 3.88   | 0.62     | 450.8   | 1         | 17/36           |

|      |                                   |            |          |   |          |      |      |      |        |   |        |
|------|-----------------------------------|------------|----------|---|----------|------|------|------|--------|---|--------|
| 3581 | K.HPADIPDYLK.L                    | 1168.59970 | 0.59000  | 2 | 5.61E-11 | 0.92 | 2.43 | 0.94 | 320.8  | 1 | 18/27  |
| 2291 | K.IQDKEGIPPDQQR.L                 | 1523.78125 | -1.00762 | 2 | 2.27E-10 | 0.77 | 3.08 | 0.61 | 235.1  | 1 | 14/36  |
| 1297 | L.KDGGHYDAEVK.T                   | 1218.57494 | -1.15529 | 2 | 4.07E-06 | 0.87 | 2.87 | 0.62 | 555.5  | 1 | 16/30  |
| 2838 | K.KPVQLPGAYK.T                    | 1100.64626 | -1.19122 | 2 | 1.12E-07 | 0.77 | 2.82 | 0.57 | 247.2  | 1 | 14/27  |
| 2537 | K.KJPVQLPGAYK.T                   | 1214.68916 | -2.22873 | 2 | 2.39E-05 | 0.88 | 3.14 | 0.62 | 599.1  | 1 | 14/27  |
| 2537 | K.K#PVQLPGAYK.T                   | 1214.68916 | -2.22873 | 2 | 2.39E-05 | 0.88 | 3.14 | 0.00 | 599.1  | 1 | 14/27  |
| 2304 | K.KTMGWEASTER.M                   | 1295.60486 | -0.81377 | 2 | 1.87E-06 | 0.74 | 2.68 | 0.64 | 253.0  | 1 | 13/30  |
| 1753 | K.KTM*GWEASTER.M                  | 1311.59978 | -1.30499 | 2 | 4.98E-08 | 0.91 | 3.24 | 0.81 | 336.3  | 1 | 16/30  |
| 4324 | K.LDITSHNEDYTIVEQYER.A            | 2225.03568 | -1.31230 | 2 | 1.89E-14 | 0.96 | 3.85 | 0.80 | 1174.5 | 1 | 24/51  |
| 1295 | K.LKDGGHYDAEVK.T                  | 1331.65901 | -1.02528 | 2 | 6.34E-09 | 0.94 | 3.95 | 0.66 | 869.0  | 1 | 17/33  |
| 2976 | K.LRGTNFPDGPVVMQK.K               | 1646.83190 | -0.78995 | 3 | 1.55E-02 | 0.94 | 3.25 | 0.84 | 1190.4 | 1 | 30/84  |
| 2460 | K.LRGTNFPDGPVVM*QK.K              | 1662.82682 | -0.40682 | 3 | 1.63E-09 | 0.96 | 4.46 | 0.91 | 1041.9 | 1 | 34/84  |
| 2499 | T.LSDYNIQK.E                      | 980.50474  | -0.73639 | 2 | 1.85E-04 | 0.85 | 2.63 | 0.61 | 444.5  | 1 | 13/21  |
| 4740 | K.LSFPEGFK.W                      | 924.48254  | -1.07192 | 2 | 8.73E-06 | 0.86 | 2.02 | 0.94 | 339.8  | 1 | 12/21  |
| 3130 | R.M*EGSVNGHEFEIEGEGEGR.P          | 2078.87199 | -1.50260 | 3 | 3.57E-08 | 0.93 | 3.85 | 0.88 | 720.3  | 1 | 26/108 |
| 3430 | R.MEGSVNGHEFEIEGEGEGRPYEGTQTAK.L  | 3038.34323 | -2.06871 | 3 | 6.16E-09 | 0.90 | 3.29 | -    | 370.8  | 1 | 27/162 |
| 3266 | R.M*EGSVNGHEFEIEGEGEGRPYEGTQTAK.L | 3054.33815 | -1.71796 | 4 | 8.58E-11 | 0.94 | 4.94 | 0.82 | 514.8  | 1 | 39/243 |
| 2194 | R.M*YPEDGALK.G                    | 1039.47648 | -0.81303 | 2 | 3.80E-03 | 0.83 | 2.47 | 0.69 | 308.3  | 1 | 14/24  |
| 3119 | R.MYPEDGALKGEIK.M                 | 1450.72464 | -0.66313 | 2 | 1.74E-08 | 0.89 | 3.01 | 0.64 | 454.2  | 1 | 21/36  |
| 2640 | R.M*YPEDGALKGEIK.M                | 1466.71956 | -0.43823 | 2 | 1.34E-04 | 0.92 | 3.36 | 0.68 | 722.7  | 1 | 19/36  |
| 3490 | H.PADIPDYLK.L                     | 1031.54079 | -1.03496 | 2 | 2.40E-04 | 0.88 | 2.74 | 0.73 | 570.4  | 1 | 13/24  |
| 2759 | Y.PEDGALKGEIK.M                   | 1156.62083 | -1.31329 | 2 | 4.47E-03 | 0.80 | 3.56 | 0.45 | 356.3  | 1 | 14/30  |
| 2432 | F.PSDGPVVM*QK.K                   | 974.46116  | -1.37259 | 2 | 9.55E-04 | 0.87 | 2.22 | 0.80 | 461.6  | 1 | 15/24  |
| 3081 | K.PVQLPGAYK.T                     | 972.55129  | -2.17189 | 2 | 2.87E-04 | 0.74 | 2.52 | 0.64 | 395.0  | 1 | 11/24  |
| 910  | R.PYEGTQTAK.L                     | 994.48400  | -2.39973 | 2 | 1.27E-04 | 0.83 | 2.47 | 0.64 | 442.5  | 1 | 14/24  |
| 1383 | I.QDKEGIPPDQQR.L                  | 1410.69718 | 0.00641  | 2 | 7.43E-03 | 0.31 | 2.03 | 0.50 | 86.8   | 1 | 11/33  |
| 3931 | T.QDSSLQDGEFIYK.V                 | 1529.71183 | -0.71134 | 2 | 3.82E-06 | 0.90 | 3.69 | 0.70 | 412.3  | 1 | 16/36  |
| 1493 | L.SDYNIQK.E                       | 867.42067  | -1.23319 | 2 | 1.57E-03 | 0.86 | 2.61 | 0.69 | 411.7  | 1 | 11/18  |
| 3871 | D.SSLQDGEFIYK.V                   | 1286.62631 | -1.64420 | 2 | 6.66E-07 | 0.93 | 3.01 | 0.69 | 1046.0 | 1 | 17/30  |
| 3911 | E.STLHLVLR.L                      | 938.57818  | -0.71962 | 2 | 2.99E-06 | 0.26 | 2.44 | -    | 307.8  | 1 | 11/21  |
| 5814 | K.TITLEVEPSDTIENVK.A              | 1787.92730 | -1.09655 | 2 | 1.79E-10 | 0.83 | 3.07 | 0.58 | 494.4  | 1 | 18/45  |
| 3906 | S.TLHLVLR.L                       | 851.54615  | -1.45594 | 2 | 1.35E-03 | 0.25 | 2.07 | -    | 224.1  | 1 | 11/18  |
| 2562 | R.TLSDYNIQK.E                     | 1081.55242 | -1.24117 | 2 | 2.67E-06 | 0.94 | 2.84 | 0.89 | 565.1  | 1 | 18/24  |
| 4260 | K.TLTGK#TITLEVEPSDTIENVK.A        | 2402.26605 | -0.59409 | 3 | 8.64E-05 | 0.71 | 4.18 | 0.12 | 484.4  | 1 | 29/120 |
| 2199 | K.TM*GWEASTER.M                   | 1183.50482 | -0.73074 | 2 | 1.09E-07 | 0.96 | 3.37 | 0.87 | 885.1  | 1 | 18/27  |
| 2951 | K.TMGWEASTER.M                    | 1167.50990 | -1.43243 | 2 | 1.95E-07 | 0.96 | 3.88 | 0.70 | 782.3  | 1 | 19/27  |
| 4801 | R.VM*NFEDGGVVTVTQDSSLQDGEFIYK.V   | 2894.34005 | -0.50269 | 3 | 4.39E-10 | 0.88 | 3.75 | 0.72 | 467.1  | 1 | 28/150 |

|      |                  |            |          |   |          |      |      |      |       |   |       |
|------|------------------|------------|----------|---|----------|------|------|------|-------|---|-------|
| 2799 | P.VQLPGAYK.T     | 875.49853  | -0.84528 | 2 | 1.73E-04 | 0.82 | 2.58 | 0.78 | 252.4 | 1 | 11/21 |
| 2706 | M.YPEDGALKGEIK.M | 1319.68416 | -1.21090 | 3 | 1.33E-03 | 0.77 | 2.52 | 0.59 | 547.8 | 1 | 25/66 |
| 3374 | D.YTIVEQYER.A    | 1200.58953 | -1.02010 | 2 | 5.48E-03 | 0.91 | 3.29 | 0.73 | 454.1 | 1 | 14/24 |

**Modifications:**

**M\* oxidized Met**

**K# glygly Lys**
