# Supplementary material
Source: PubMed Central journal article supplement (PMC3243545)
Supplement: supp_M111.234559_FigureS11.pdf [file supp_M111.234559_FigureS11.pdf]

**(MATRIX) Mascot Search Results**

**Protein View**

Match to: **YD\_RFP-HERPc-Ub** Score: **291**

**YD\_RFP-HERPc-Ub**

Found in search of C:\Documents and Settings\Safire2\My Documents\20100106\_YaelDavid\BIT00737\_YD\_11\_Herp\_gp78\_G2\_merge.mgf

Nominal mass (Mr): **64441**; Calculated pI value: **5.86**

NCBI BLAST search of **YD\_RFP-HERPc-Ub** against nr

Unformatted [sequence string](#) for pasting into other applications

Fixed modifications: Carbamidomethyl (C)

Variable modifications: Deamidated (NQ), Oxidation (M), GlyGly (K)

Cleavage by Trypsin: cuts C-term side of KR unless next residue is P

Sequence Coverage: **24%**

Matched peptides shown in **Bold Red**

```

1 MHHHHHHASS EDVIKEFMRF KVRMEGSVNG HEFEIEGEGE GRPYEGTQTA
51 KLKVTKGGPL PFAMDILSPQ FQYGSKAYVK HPADIPDYLK LSFPEGFKWE
101 RVMNFEDGGV VVTQDSSLQ DGEFLYKVKL RGTNFSDGDP VMQKRTMGWE
151 ASTERMYPED GALKGEIKMR LKLGQGHYD AENVKTYMAK KPVQLPGAYK
201 TDIKLDTSH NEDYTIYVQY ERAEGRHSIG AENLTFQGLE ESETEPEPVT
251 LLVKSFNQRH RDLKSGDRG WSVGHKRAHL SRVYPERPRP EDQRLIYSCK
301 LLLLDHQCLRD LLPKQEKRHV LHLVGNVYKSP SKMPEINAKV AESTTEPAGS
351 NRGQYVEDSS SDGLRQREV L RNLSSPQWEN ISRPEAAQA PQGLGPGFSG
401 YTPYQWLQLS WFQIYARQY YMQYLAATAA SGAFVPPPSA QEIPVVSAPA
451 PAPIHNQFPA ENQPAQNAA PQVWYPLGAN QNLRMNAQGG PIVEEDDEQI
501 FVKRLTKGKI TLEVEPDTI ENVKAKIQDK EGIPPDQRL IFAGKQLEDG
551 RTLSDYNIQK ESTLHLVLR RGG
    
```

Show predicted peptides also

Sort Peptides By  Residue Number  Increasing Mass  Decreasing Mass

| Start | End | Observed  | Mr (expt) | Mr (calc) | Delta   | Miss | Sequence                                                                 |
|-------|-----|-----------|-----------|-----------|---------|------|--------------------------------------------------------------------------|
| 57    | 76  | 1104.3670 | 2206.7194 | 2207.1051 | -0.3857 | 0    | <b>K.GGPLPFAMDILSPQFQYGSK.A</b> ( <a href="#">Ions score 24</a> )        |
| 91    | 98  | 462.5310  | 923.0474  | 923.4753  | -0.4278 | 0    | <b>K.LSFPEGFK.W</b> ( <a href="#">Ions score 35</a> )                    |
| 91    | 98  | 462.5420  | 923.0694  | 923.4753  | -0.4058 | 0    | <b>K.LSFPEGFK.W</b> ( <a href="#">Ions score 35</a> )                    |
| 91    | 98  | 462.6380  | 923.2614  | 923.4753  | -0.2138 | 0    | <b>K.LSFPEGFK.W</b> ( <a href="#">Ions score 43</a> )                    |
| 132   | 144 | 688.9350  | 1375.8554 | 1376.6395 | -0.7840 | 0    | <b>R.GTNFSDGDPVMQK.K</b> ( <a href="#">Ions score 68</a> )               |
| 132   | 144 | 688.9610  | 1375.9074 | 1376.6395 | -0.7320 | 0    | <b>R.GTNFSDGDPVMQK.K</b> ( <a href="#">Ions score 46</a> )               |
| 132   | 144 | 688.9860  | 1375.9574 | 1376.6395 | -0.6820 | 0    | <b>R.GTNFSDGDPVMQK.K</b> ( <a href="#">Ions score 28</a> )               |
| 132   | 144 | 689.0010  | 1375.9874 | 1376.6395 | -0.6520 | 0    | <b>R.GTNFSDGDPVMQK.K</b> ( <a href="#">Ions score 59</a> )               |
| 132   | 144 | 696.9520  | 1391.8894 | 1392.6344 | -0.7449 | 0    | <b>R.GTNFSDGDPVMQK.K</b> Oxidation (M) ( <a href="#">Ions score 72</a> ) |
| 132   | 144 | 696.9830  | 1391.9514 | 1392.6344 | -0.6829 | 0    | <b>R.GTNFSDGDPVMQK.K</b> Oxidation (M) ( <a href="#">Ions score 69</a> ) |
| 146   | 155 | 583.9500  | 1165.8854 | 1166.5026 | -0.6172 | 0    | <b>K.TMGWEASTER.W</b> ( <a href="#">Ions score 37</a> )                  |
| 146   | 155 | 592.0180  | 1182.0214 | 1182.4975 | -0.4761 | 0    | <b>K.TMGWEASTER.W</b> Oxidation (M) ( <a href="#">Ions score 52</a> )    |
| 191   | 200 | 550.5430  | 1099.0714 | 1099.6390 | -0.5675 | 0    | <b>K.KPVQLPGAYK.T</b> ( <a href="#">Ions score 48</a> )                  |
| 191   | 200 | 1100.3580 | 1099.3507 | 1099.6390 | -0.2882 | 0    | <b>K.KPVQLPGAYK.T</b> ( <a href="#">Ions score 32</a> )                  |
| 191   | 200 | 550.8850  | 1099.7554 | 1099.6390 | 0.1165  | 0    | <b>K.KPVQLPGAYK.T</b> ( <a href="#">Ions score 53</a> )                  |
| 191   | 200 | 551.2470  | 1100.4794 | 1099.6390 | 0.8405  | 0    | <b>K.KPVQLPGAYK.T</b> ( <a href="#">Ions score 51</a> )                  |
| 191   | 200 | 551.5770  | 1101.1394 | 1099.6390 | 1.5005  | 0    | <b>K.KPVQLPGAYK.T</b> ( <a href="#">Ions score 51</a> )                  |
| 205   | 222 | 1112.4490 | 2222.8834 | 2224.0284 | -1.1449 | 0    | <b>K.LDITSHNEDYTIYVQYER.A</b> ( <a href="#">Ions score 23</a> )          |
| 509   | 524 | 893.9810  | 1785.9474 | 1786.9200 | -0.9726 | 0    | <b>K.TITLEVEPDTIENVK.A</b> ( <a href="#">Ions score 19</a> )             |
| 509   | 524 | 894.0250  | 1786.0354 | 1786.9200 | -0.8846 | 0    | <b>K.TITLEVEPDTIENVK.A</b> ( <a href="#">Ions score 52</a> )             |
| 509   | 524 | 894.0440  | 1786.0734 | 1786.9200 | -0.8466 | 0    | <b>K.TITLEVEPDTIENVK.A</b> ( <a href="#">Ions score 48</a> )             |
| 527   | 539 | 1522.7980 | 1521.7907 | 1522.7740 | -0.9832 | 1    | <b>K.IQDKEGIPPDQQR.L</b> ( <a href="#">Ions score 41</a> )               |
| 527   | 539 | 508.2810  | 1521.8212 | 1522.7740 | -0.9528 | 1    | <b>K.IQDKEGIPPDQQR.L</b> ( <a href="#">Ions score 40</a> )               |
| 527   | 539 | 761.9790  | 1521.9434 | 1522.7740 | -0.8305 | 1    | <b>K.IQDKEGIPPDQQR.L</b> ( <a href="#">Ions score 35</a> )               |
| 527   | 539 | 762.0050  | 1521.9954 | 1522.7740 | -0.7785 | 1    | <b>K.IQDKEGIPPDQQR.L</b> ( <a href="#">Ions score 30</a> )               |
| 527   | 539 | 762.0360  | 1522.0574 | 1522.7740 | -0.7165 | 1    | <b>K.IQDKEGIPPDQQR.L</b> ( <a href="#">Ions score 47</a> )               |
| 527   | 539 | 762.4520  | 1522.8894 | 1522.7740 | 0.1155  | 1    | <b>K.IQDKEGIPPDQQR.L</b> ( <a href="#">Ions score 50</a> )               |
| 540   | 551 | 730.5430  | 1459.0714 | 1459.7783 | -0.7069 | 1    | <b>R.LIFAGKQLEDGR.T</b> GlyGly (K) ( <a href="#">Ions score 68</a> )     |
| 540   | 551 | 730.5700  | 1459.1254 | 1459.7783 | -0.6529 | 1    | <b>R.LIFAGKQLEDGR.T</b> GlyGly (K) ( <a href="#">Ions score 76</a> )     |
| 540   | 551 | 487.4830  | 1459.4272 | 1459.7783 | -0.3511 | 1    | <b>R.LIFAGKQLEDGR.T</b> GlyGly (K) ( <a href="#">Ions score 35</a> )     |
| 552   | 560 | 540.9560  | 1079.8974 | 1080.5451 | -0.6477 | 0    | <b>R.TLSDYNIQK.E</b> ( <a href="#">Ions score 65</a> )                   |
| 552   | 560 | 1080.9510 | 1079.9437 | 1080.5451 | -0.6014 | 0    | <b>R.TLSDYNIQK.E</b> ( <a href="#">Ions score 17</a> )                   |
| 552   | 560 | 540.9910  | 1079.9674 | 1080.5451 | -0.5777 | 0    | <b>R.TLSDYNIQK.E</b> ( <a href="#">Ions score 65</a> )                   |
| 552   | 560 | 541.0250  | 1080.0354 | 1080.5451 | -0.5097 | 0    | <b>R.TLSDYNIQK.E</b> ( <a href="#">Ions score 64</a> )                   |
| 561   | 569 | 534.0320  | 1066.0494 | 1066.6135 | -0.5640 | 0    | <b>K.ESTLHLVLR.L</b> ( <a href="#">Ions score 61</a> )                   |
| 561   | 569 | 534.0610  | 1066.1074 | 1066.6135 | -0.5060 | 0    | <b>K.ESTLHLVLR.L</b> ( <a href="#">Ions score 50</a> )                   |
| 561   | 569 | 534.5220  | 1067.0294 | 1066.6135 | 0.4160  | 0    | <b>K.ESTLHLVLR.L</b> ( <a href="#">Ions score 41</a> )                   |

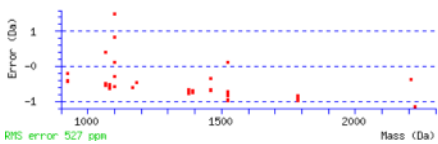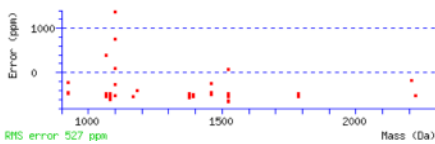

Mascot: <http://www.matrixscience.com/>

**MASCOT** **SCIENCE** Mascot Search Results

**Protein View**

Match to: **YD\_RFP-HERPc-Ub** Score: **380**

**YD\_RFP-HERPc-Ub**

Found in search of C:\Documents and Settings\Safire2\My Documents\20100106\_YaelDavid\BIT00782\_YD\_14\_HerpUb\_gp78\_G2\_merge.mgf

Nominal mass (Mr): **64441**; Calculated pI value: **5.86**

NCBI BLAST search of **YD\_RFP-HERPc-Ub** against nr

Unformatted [sequence string](#) for pasting into other applications

Fixed modifications: Carbamidomethyl (C)

Variable modifications: Deamidated (NQ), Oxidation (M), GlyGly (K)

Cleavage by Trypsin: cuts C-term side of KR unless next residue is P

Sequence Coverage: **29%**

Matched peptides shown in **Bold Red**

```

1 MHHHHHHASS EDVIKEFMRF KVRMEGSVNG HEFEIEGEGE GRPYEGTQTA
51 KLKVTKGGPL PFAMWLLSPQ FQYGSKAYVK HPADIPDYLK LSFPEGFKWE
101 RVNMFEDGGV VVTQDSSLQ DGEFLYKVKL RGTNFPSDGP VMQKRTMGWE
151 ASTERMYPED GALKGEIKMR LKLGQGHVD AEVKTYMAK KPVQLPGAYK
201 TDIKLDTISH NEDTIVYEQY ERAEGRHSIG AENLTFQGLE ESETEPEPVT
251 LLVKSFNQRH RDELSEDRG WSYGHLKAHL SRVYPERPRP EDQRLIYSCK
301 LLLDHQCLRD LLPKQEKRHV LHLVGNVKSP SKMPEINAKV AESTTEEPAGS
351 NRGQYFEDSS SDGLRQREVL RNLSSPQWEN ISRPEAAQQA PQGLGPGFSG
401 YTPYHQLQLS WFOQIYARQY YMQVLAATAA SGAFVPPPSA QEIPVVSAPA
451 PAPIHNQFPA ENQPANQNAA PQVWVNGAN QNLRMNAQGG PIVEEDDEQI
501 FVKTLTGKTI TLEVEPSDTI ENVKAKIQD EGIPPDQQL IFAGKQLEDG
551 RTLSDYNIQK ESTLHLVLRL RGG
    
```

Show predicted peptides also

Sort Peptides By  Residue Number  Increasing Mass  Decreasing Mass

| Start | End   | Observed  | Mr (expt) | Mr (calc) | Delta   | Miss | Sequence                                                            |
|-------|-------|-----------|-----------|-----------|---------|------|---------------------------------------------------------------------|
| 57    | - 76  | 1103.9710 | 2205.9274 | 2207.1051 | -1.1777 | 0    | <b>K.GGPLPFAMWLLSPQFQYGSK.A</b> (Ions score 20)                     |
| 91    | - 98  | 462.6210  | 923.2274  | 923.4753  | -0.2478 | 0    | <b>K.LSFPEGFK.W</b> (Ions score 47)                                 |
| 102   | - 127 | 1439.1770 | 2876.3394 | 2877.3379 | -0.9984 | 0    | <b>R.VNMFEDGGVVTVTQDSSLQDGEFLYK.V</b> (Ions score 27)               |
| 102   | - 127 | 960.2050  | 2877.5932 | 2877.3379 | 0.2553  | 0    | <b>R.VNMFEDGGVVTVTQDSSLQDGEFLYK.V</b> (Ions score 55)               |
| 102   | - 127 | 1440.1800 | 2878.3454 | 2877.3379 | 1.0076  | 0    | <b>R.VNMFEDGGVVTVTQDSSLQDGEFLYK.V</b> (Ions score 66)               |
| 102   | - 127 | 1447.2860 | 2892.5574 | 2893.3328 | -0.7754 | 0    | <b>R.VNMFEDGGVVTVTQDSSLQDGEFLYK.V</b> Oxidation (M) (Ions score 36) |
| 102   | - 127 | 965.4670  | 2893.3792 | 2893.3328 | 0.0464  | 0    | <b>R.VNMFEDGGVVTVTQDSSLQDGEFLYK.V</b> Oxidation (M) (Ions score 30) |
| 102   | - 127 | 1447.7230 | 2893.4314 | 2893.3328 | 0.0986  | 0    | <b>R.VNMFEDGGVVTVTQDSSLQDGEFLYK.V</b> Oxidation (M) (Ions score 80) |
| 102   | - 127 | 965.5790  | 2893.7152 | 2893.3328 | 0.3824  | 0    | <b>R.VNMFEDGGVVTVTQDSSLQDGEFLYK.V</b> Oxidation (M) (Ions score 62) |
| 132   | - 144 | 1376.7230 | 1375.7157 | 1376.6395 | -0.9237 | 0    | <b>R.GTNFSDGPFVMQK.K</b> (Ions score 26)                            |
| 132   | - 144 | 689.0130  | 1376.0114 | 1376.6395 | -0.6280 | 0    | <b>R.GTNFSDGPFVMQK.K</b> (Ions score 60)                            |
| 132   | - 144 | 697.0420  | 1392.0694 | 1392.6344 | -0.5649 | 0    | <b>R.GTNFSDGPFVMQK.K</b> Oxidation (M) (Ions score 82)              |
| 145   | - 155 | 656.1940  | 1310.3734 | 1310.5925 | -0.2190 | 1    | <b>K.KTMGEASTER.M</b> Oxidation (M) (Ions score 83)                 |
| 146   | - 155 | 592.0130  | 1182.0114 | 1182.4975 | -0.4861 | 0    | <b>K.KTMGEASTER.M</b> Oxidation (M) (Ions score 62)                 |
| 173   | - 184 | 1330.8950 | 1329.8877 | 1330.6517 | -0.7640 | 1    | <b>K.LKDGHYDAVK.T</b> (Ions score 29)                               |
| 191   | - 200 | 550.5930  | 1099.1714 | 1099.6390 | -0.4675 | 0    | <b>K.KPVQLPGAYK.T</b> (Ions score 53)                               |
| 191   | - 200 | 551.5700  | 1101.1254 | 1099.6390 | 1.4865  | 0    | <b>K.KPVQLPGAYK.T</b> (Ions score 56)                               |
| 205   | - 222 | 1112.8770 | 2223.7394 | 2224.0284 | -0.2889 | 0    | <b>K.LDITSHNEDYTIQEYER.A</b> (Ions score 32)                        |
| 205   | - 222 | 1112.8900 | 2223.7654 | 2224.0284 | -0.2629 | 0    | <b>K.LDITSHNEDYTIQEYER.A</b> (Ions score 10)                        |
| 205   | - 222 | 1113.1440 | 2224.2734 | 2224.0284 | 0.2451  | 0    | <b>K.LDITSHNEDYTIQEYER.A</b> (Ions score 99)                        |
| 509   | - 524 | 894.0110  | 1786.0074 | 1786.9200 | -0.9126 | 0    | <b>K.TITLEVEPSDTIENVK.A</b> (Ions score 47)                         |
| 509   | - 524 | 894.4870  | 1786.9594 | 1786.9200 | 0.0394  | 0    | <b>K.TITLEVEPSDTIENVK.A</b> (Ions score 47)                         |
| 509   | - 524 | 894.6030  | 1787.1914 | 1786.9200 | 0.2714  | 0    | <b>K.TITLEVEPSDTIENVK.A</b> (Ions score 56)                         |
| 527   | - 539 | 762.0100  | 1522.0054 | 1522.7740 | -0.7685 | 1    | <b>K.IQDKEGIPPDQQR.L</b> (Ions score 51)                            |
| 540   | - 551 | 730.6110  | 1459.2074 | 1459.7783 | -0.5709 | 1    | <b>R.LIFAGKQLEDGR.T</b> GlyGly (K) (Ions score 70)                  |
| 561   | - 569 | 534.0470  | 1066.0794 | 1066.6135 | -0.5340 | 0    | <b>K.ESTLHLVLR.L</b> (Ions score 66)                                |
| 561   | - 569 | 534.4130  | 1066.8114 | 1066.6135 | 0.1980  | 0    | <b>K.ESTLHLVLR.L</b> (Ions score 29)                                |

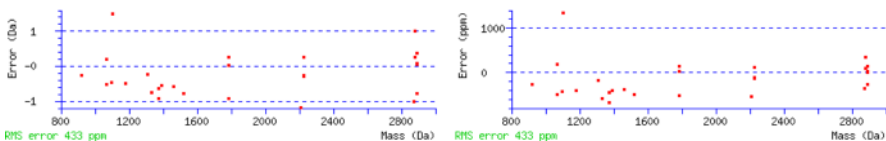

Mascot: <http://www.matrixscience.com/>
