# Supplementary material
Source: PubMed Central journal article supplement (PMC3243545)
Supplement: supp_M111.234559_FigureS12.pdf [file supp_M111.234559_FigureS12.pdf]

RT: 53.75 - 62.39

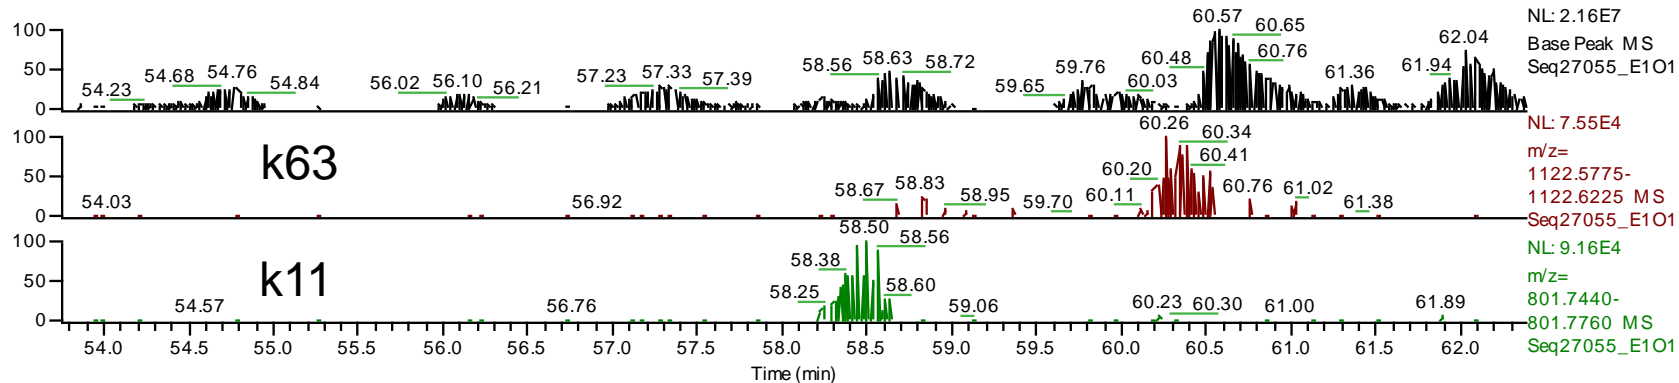

Seq27055\_E101 # 7609-7940 RT: 59.00-61.21 AV: 106 NL: 9.18E3

T: FTMS +p NSI Full ms [350.00-1807.24]

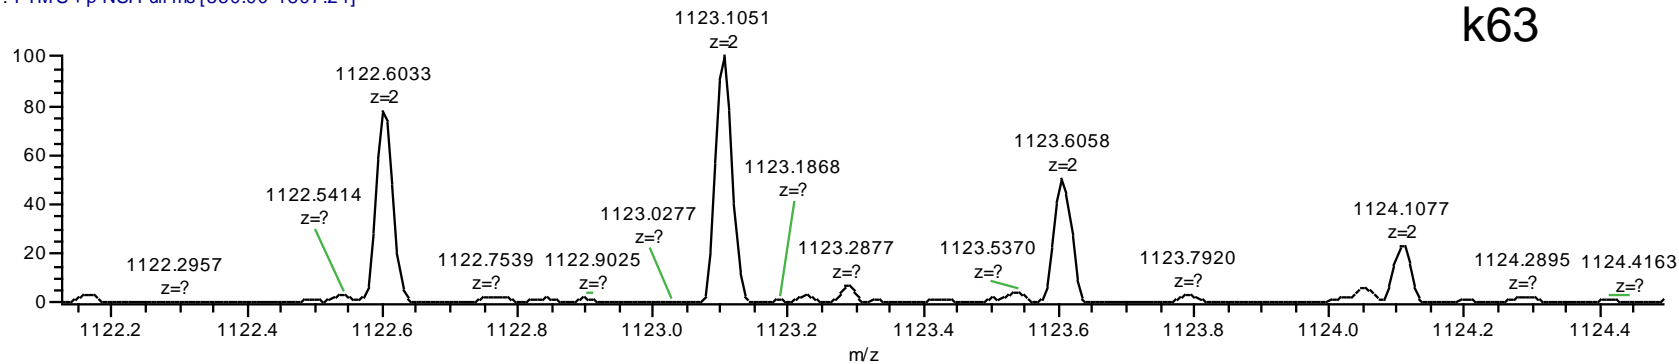

Seq27055\_E101 # 7490-7546 RT: 58.26-58.60 AV: 17 NL: 4.08E4

T: FTMS +p NSI Full ms [350.00-1807.24]

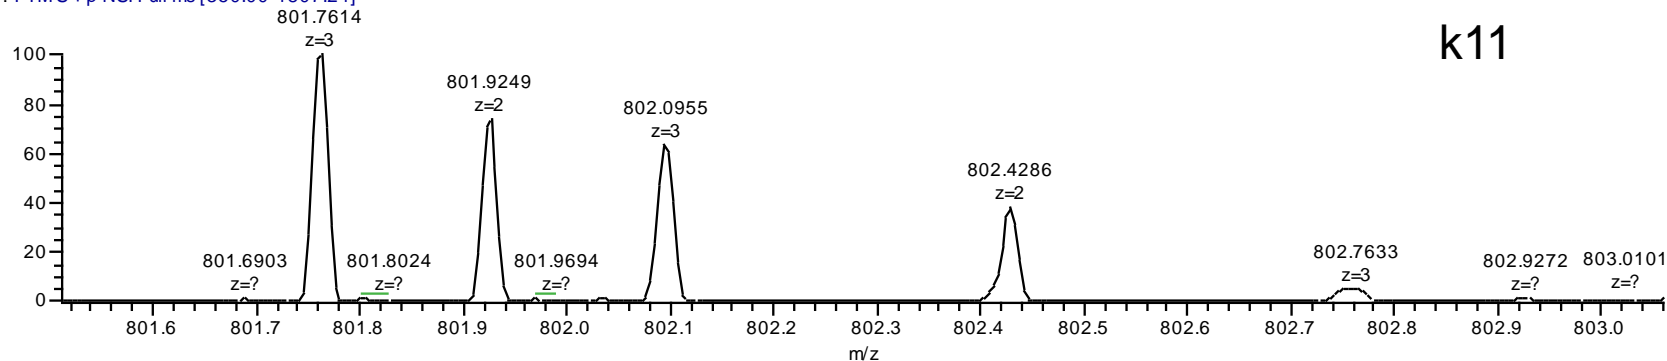

T  
L  
T  
G  
K  
#  
T  
I  
T  
L  
E  
V  
E  
P  
S  
D  
T  
I  
E  
N  
V  
K

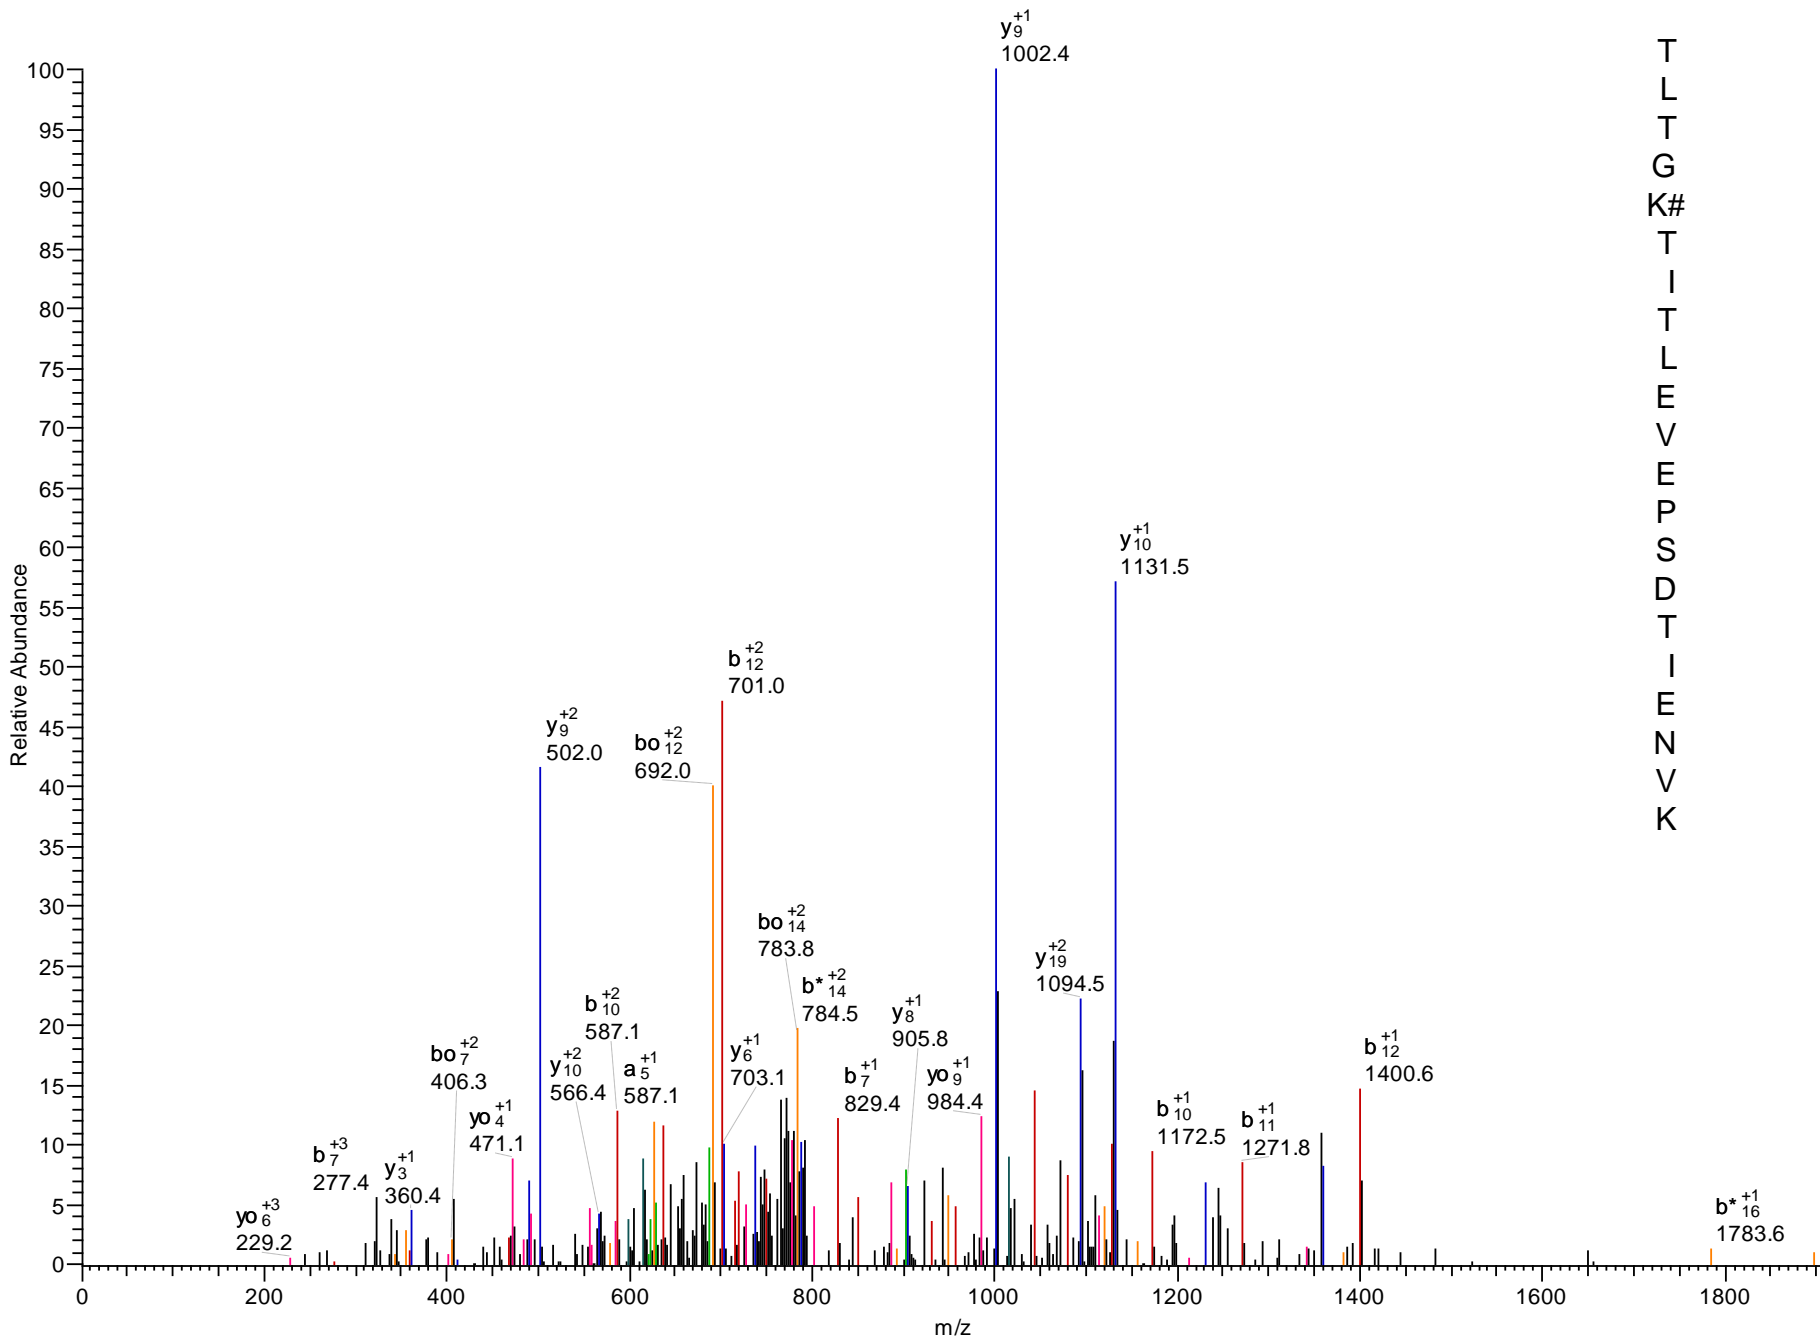

T  
L  
S  
D  
Y  
N  
I  
Q  
K#  
E  
S  
T  
L  
H  
L  
V  
L  
R

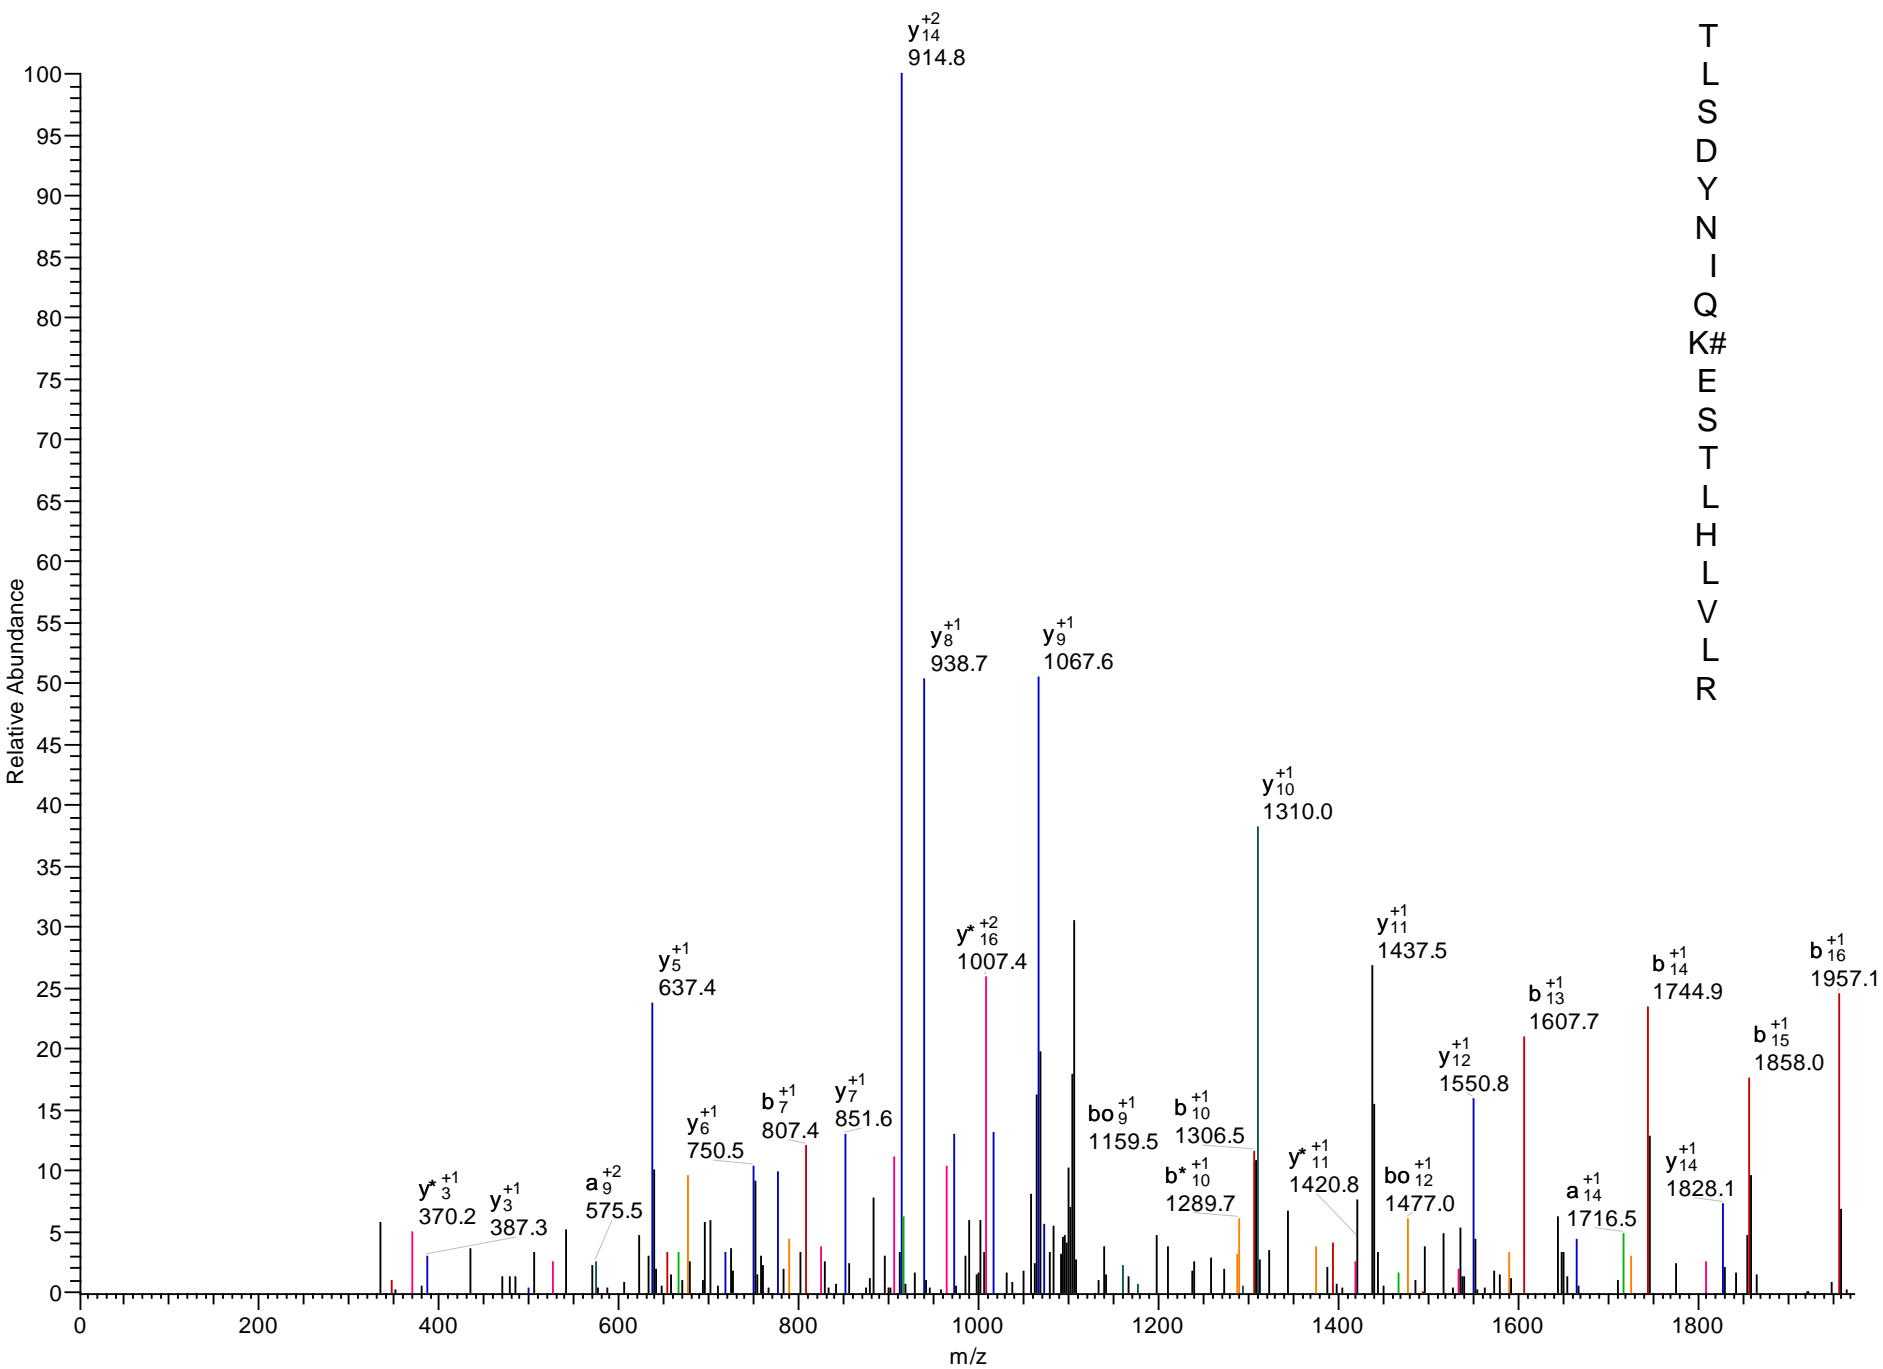

| Referer #1 P53 N/V1 MDM2 MDMX |                                                |            |          | P (pro) | Sf   | Score    | Coverage | MW     | Acsn    | Peptide (Hits) | Count     |                 |
|-------------------------------|------------------------------------------------|------------|----------|---------|------|----------|----------|--------|---------|----------------|-----------|-----------------|
| Scan(s)                       | Peptide                                        | MH+        | DeltaM   | z       | Type | P (pep)  | Sf       | XC     | DeltaCn | Sp             | RSp       | Ions            |
| 1                             | gij260080636 gb ACX31156.1 MDM2 [Homo sapiens] |            | (ppm)    |         |      | 4.11E-14 | 20.38    | 242.28 | 41.80   | 52436.5        | 260080636 | 26 (22 2 0 1 1) |
| 3487                          | R.AISETTEENSDELSEGER.Q                         | 1765.77226 | 0.62633  | 2       | CID  | 4.55E-08 | 0.87     | 2.83   | 0.54    | 613.8          | 1         | 16/30           |
| 3303                          | R.AISETTEEN@SDELSEGER.Q                        | 1766.75627 | -3.10912 | 2       | CID  | 4.51E-08 | 0.96     | 4.23   | 0.65    | 1086.1         | 1         | 18/30           |
| 4171                          | K.AKLENSTQAEEGFDVPDCKK.T                       | 2266.06564 | 0.32690  | 3       | CID  | 6.24E-10 | 0.90     | 4.48   | 0.07    | 1156.7         | 1         | 32/76           |
| 4208                          | K.AKLENSTQAEEGFDVPD^CKK.T                      | 2280.08129 | 0.55485  | 3       | CID  | 9.26E-04 | 0.73     | 3.78   | 0.26    | 382.0          | 1         | 21/76           |
| 4439                          | K.AKLEN@STQAEEGFDVPDCKK.T                      | 2267.04965 | -0.40333 | 3       | CID  | 6.53E-07 | 0.89     | 5.30   | 0.05    | 822.6          | 1         | 28/76           |
| 6890                          | K.DLVQELQEEKPSSSHLVS.R                         | 2181.11460 | -0.58959 | 3       | CID  | 7.66E-09 | 0.88     | 3.84   | 0.06    | 1423.6         | 1         | 33/72           |
| 5261                          | R.ENWLPEDK.G                                   | 1030.48400 | -0.18363 | 2       | CID  | 3.37E-01 | 0.66     | 2.23   | 0.49    | 217.8          | 1         | 8/14            |
| 3845                          | R.ENWLPEDK.GK.D                                | 1215.60043 | -0.13234 | 2       | CID  | 2.17E-04 | 0.72     | 2.04   | 0.49    | 154.4          | 1         | 12/18           |
| 8053                          | L.FYLGQYIM*TK.R                                | 1279.63912 | -1.36412 | 2       | CID  | 1.05E-05 | 0.96     | 3.42   | 0.73    | 1021.1         | 1         | 14/18           |
| 4052                          | K.IYTM*IYR.N                                   | 975.49682  | -0.00251 | 2       | CID  | 2.67E-04 | 0.85     | 2.27   | 0.51    | 238.1          | 1         | 10/12           |
| 5695                          | K.IYTM.IYR.N                                   | 959.50190  | -0.02244 | 2       | CID  | 2.89E-03 | 0.78     | 2.17   | 0.49    | 147.0          | 1         | 9/12            |
| 3393                          | R.KIYTM*IYR.N                                  | 1103.59178 | 1.12635  | 3       | CID  | 9.80E-04 | 0.89     | 2.65   | 0.60    | 667.3          | 1         | 17/28           |
| 4789                          | R.KIYTM.IYR.N                                  | 1087.59686 | -0.01272 | 2       | CID  | 2.15E-01 | 0.69     | 2.06   | 0.55    | 279.7          | 1         | 8/14            |
| 5339                          | K.LENSTQAEEGFDVPDCK.K                          | 1938.83860 | 1.42218  | 2       | CID  | 5.67E-05 | 0.60     | 2.87   | 0.18    | 436.2          | 1         | 14/32           |
| 4446                          | K.LENSTQAEEGFDVPDCKK.T                         | 2066.93356 | 1.21966  | 2       | CID  | 1.01E-04 | 0.37     | 2.75   | 0.12    | 293.9          | 1         | 12/34           |
| 8998                          | D.PEISLADYWK.C                                 | 1221.61502 | -1.58062 | 2       | CID  | 3.79E-04 | 0.87     | 2.77   | 0.59    | 547.5          | 1         | 11/18           |
| 3749                          | R.SSSSESTGTPSNPDL DAGVSEHSGD.W                 | 2419.99679 | 0.33717  | 2       | CID  | 3.54E-07 | 0.80     | 3.54   | 0.25    | 517.9          | 1         | 20/48           |
| 3321                          | K.TGHLM*ACFTCAK.K                              | 1412.61201 | 0.15541  | 2       | CID  | 1.77E-07 | 0.94     | 2.61   | 0.68    | 909.1          | 1         | 16/22           |
| 2                             | His-RFP-p53                                    |            |          |         |      | 6.17E-12 | 21.73    | 260.24 | 42.10   | 70829.9        |           | 26 (26 0 0 0 0) |
| 5150                          | R.CSDSDGLAPPQH.LIR.V                           | 1665.80137 | 0.92336  | 2       | CID  | 1.74E-03 | 0.68     | 2.56   | 0.58    | 230.9          | 1         | 11/28           |
| 1058                          | K.DGGHYDAEVK.T                                 | 1090.47998 | 0.26912  | 2       | CID  | 2.89E-03 | 0.65     | 2.28   | 0.35    | 322.0          | 1         | 11/18           |
| 4646                          | R.ELNEALELKDAQAGKEPGGSR.A                      | 2212.12042 | 0.73612  | 3       | CID  | 2.33E-08 | 0.84     | 3.84   | 0.14    | 1101.3         | 1         | 26/80           |
| 3320                          | R.GTNFSPDGPVM*QK.K                             | 1393.64164 | -0.08208 | 2       | CID  | 8.33E-07 | 0.95     | 3.84   | 0.59    | 804.2          | 1         | 17/24           |
| 5309                          | K.HPADIPDY.LK.L                                | 1168.59970 | -0.03675 | 2       | CID  | 5.51E-07 | 0.93     | 2.40   | 0.81    | 344.9          | 1         | 15/18           |
| 7804                          | R.HSTGAENLYFQGLEEE.PQ.S                        | 2048.91959 | 1.01930  | 2       | CID  | 3.72E-08 | 0.93     | 3.71   | 0.52    | 781.4          | 1         | 18/34           |
| 7703                          | R.HSTGAENLYFQGLEEE.PQSDPS.V                    | 2435.06335 | 0.57132  | 2       | CID  | 1.67E-07 | 0.73     | 3.20   | 0.35    | 377.5          | 1         | 15/42           |
| 3233                          | K.KPVQLPGAYK.T                                 | 1100.64626 | -0.96941 | 2       | CID  | 1.54E-02 | 0.90     | 2.64   | 0.59    | 447.8          | 1         | 14/18           |
| 7501                          | K.LDITSHNEDY.TIVEQYER.A                        | 2225.03568 | 1.21136  | 2       | CID  | 6.17E-12 | 0.93     | 4.75   | 0.07    | 1095.6         | 1         | 19/34           |
| 3761                          | R.LGFLHSGTAK.S                                 | 1030.56801 | -0.20305 | 2       | CID  | 2.84E-05 | 0.92     | 2.78   | 0.61    | 539.4          | 1         | 14/18           |
| 1279                          | K.LKDGGHYDAEVK.T                               | 1331.65901 | -0.20027 | 2       | CID  | 4.52E-08 | 0.96     | 3.41   | 0.52    | 1583.1         | 1         | 18/22           |
| 3498                          | K.LRGTNFSPDGPVM*QK.K                           | 1662.82682 | -0.07346 | 3       | CID  | 2.48E-02 | 0.77     | 3.13   | 0.37    | 578.3          | 1         | 21/56           |
| 8445                          | K.LSFPEGFKWER.V                                | 1395.70556 | 0.47460  | 2       | CID  | 1.26E-06 | 0.42     | 2.12   | 0.28    | 216.9          | 1         | 10/20           |
| 5166                          | R.M*EGSVNGHEFEIEGEGEGR.PYEGTQTA                | 3054.33815 | -0.91699 | 4       | CID  | 2.54E-04 | 0.90     | 4.42   | 0.64    | 402.2          | 1         | 29/162          |
| 5652                          | R.MEGSVNGHEFEIEGEGEGR.PYEGTQTA                 | 3038.34323 | 0.85976  | 4       | CID  | 3.13E-03 | 0.80     | 3.47   | 0.44    | 483.6          | 1         | 31/162          |

|      |                                              |            |          |   |     |          |      |       |       |        |          |               |   |
|------|----------------------------------------------|------------|----------|---|-----|----------|------|-------|-------|--------|----------|---------------|---|
| 5421 | R.M*EGSVN@GHEFEIEGEGEGRPYEGTQ`               | 3055.32216 | 1.67791  | 4 | CID | 1.03E-08 | 0.86 | 3.52  | 0.57  | 545.2  | 1        | 34/162        | 1 |
| 6349 | H.PADIPDYLK.L                                | 1031.54079 | 0.38509  | 2 | CID | 8.95E-03 | 0.69 | 2.20  | 0.40  | 356.5  | 1        | 10/16         | 1 |
| 708  | R.RTEENLR.K                                  | 1046.52251 | 0.11309  | 2 | CID | 6.13E-06 | 0.88 | 2.70  | 0.49  | 385.2  | 1        | 11/14         |   |
| 6147 | D.SSLQDGEFIYK.V                              | 1286.62631 | 0.25333  | 2 | CID | 8.92E-05 | 0.87 | 2.36  | 0.64  | 630.0  | 1        | 12/20         | 1 |
| 3583 | K.SVTCTYSPALNK.M                             | 1340.65151 | 0.65458  | 2 | CID | 9.16E-06 | 0.95 | 3.25  | 0.65  | 915.2  | 1        | 16/22         |   |
| 8194 | K.TCPVQLWVDSTPPPGTR.V                        | 1910.94294 | 1.00845  | 2 | CID | 1.47E-06 | 0.85 | 3.27  | 0.59  | 322.2  | 1        | 14/32         |   |
| 2574 | K.TM*GWEASTER.M                              | 1183.50481 | 0.09863  | 2 | CID | 1.94E-03 | 0.93 | 2.59  | 0.67  | 836.4  | 1        | 13/18         | 2 |
| 4037 | K.TYQGSYGFR.L                                | 1078.49523 | 0.38775  | 2 | CID | 5.46E-05 | 0.77 | 2.43  | 0.61  | 249.1  | 1        | 9/16          |   |
| 3141 | R.VEYLDDR.N                                  | 909.43124  | 0.09278  | 2 | CID | 2.30E-04 | 0.92 | 2.30  | 0.63  | 508.5  | 1        | 11/12         |   |
| 4866 | R.VEYLDDRNTFR.H                              | 1427.69137 | 0.31632  | 2 | CID | 2.90E-07 | 0.84 | 2.48  | 0.60  | 342.8  | 1        | 12/20         |   |
| 3    | gj 51703339 sp P62988.1 UBIQ_HUMAN Ubiquitin |            |          |   |     | 1.05E-09 | 5.32 | 60.22 | 68.40 | 8559.6 | 51703339 | 6 (6 0 0 0 0) |   |
| 5849 | K.ESTLHLVLR.L                                | 1067.62077 | -0.22360 | 2 | CID | 2.41E-07 | 0.89 | 2.41  | 0.76  | 191.9  | 1        | 12/16         |   |
| 1628 | K.IQDKEGIPDQQR.L                             | 1523.78125 | 0.59458  | 2 | CID | 1.05E-09 | 0.95 | 3.58  | 0.66  | 667.5  | 1        | 18/24         |   |
| 7633 | K.TITLEVEPSDTIENVK.A                         | 1787.92730 | 0.40550  | 2 | CID | 5.33E-06 | 0.92 | 3.07  | 0.55  | 709.3  | 1        | 19/30         |   |
| 3564 | R.TLSDYNIQK.E                                | 1081.55242 | -0.33824 | 2 | CID | 8.79E-03 | 0.88 | 2.08  | 0.60  | 444.5  | 1        | 13/16         |   |
| 7800 | R.TLSDYNIQK#ESTLHLVLR.L                      | 2244.19724 | 1.77146  | 2 | CID | 4.91E-08 | 0.78 | 3.56  | 0.04  | 728.7  | 1        | 17/34         |   |
| 7517 | K.TLTGK#TITLEVEPSDTIENVK.A                   | 2402.26505 | 0.20329  | 3 | CID | 4.05E-03 | 0.89 | 4.47  | 0.03  | 1250.9 | 1        | 31/80         |   |

Modifications:

M\* Oxidized Met

K# glygly Lys
