# Supplementary material
Source: PubMed Central journal article supplement (PMC3243545)
Supplement: supp_M111.234559_TableS1.pdf [file supp_M111.234559_TableS1.pdf]

| <b>E2</b>     | <b>Sub.</b> | <b>RFP-Ub</b> |             | <b>RFP-20AA-Ub</b>              |                | <b>RFP-40AA-Ub</b>         |                | <b>RFP-80AA-Ub</b>               |            |
|---------------|-------------|---------------|-------------|---------------------------------|----------------|----------------------------|----------------|----------------------------------|------------|
|               |             | <b>RFP</b>    | <b>Ub</b>   | <b>RFP</b>                      | <b>Ub</b>      | <b>RFP</b>                 | <b>Ub</b>      | <b>RFP</b>                       | <b>Ub</b>  |
| <b>UBE2B</b>  |             | 50, 74, 185   | 11, 48, 63  | 45, 74, 162, 168, 184, 185, 194 | 11, 27, 48, 63 | 74, 168, 184               | 11, 48         | 45, 138, 158, 168, 184, 185, 194 | 11, 27, 48 |
| <b>UBE2C</b>  |             | 50            | 11,48       | 168, 185                        | 11, 63         | 74, 139, 168, 184 185, 194 | 11, 48         | 74, 185, 194                     | 11, 48     |
| <b>UBE2D2</b> |             | 50, 194       | 11,48,63    | 138, 139, 158, 168, 185         | 27, 48         | 74, 139, 168, 194          | ND             | 74, 139, 158, 168, 184, 194      | 11, 27, 48 |
| <b>UBE2D3</b> |             | 50, 194       | 11,48,63    | 74, 139, 158, 168, 185, 194     | 11, 27, 48, 63 | 139, 168, 185, 194         | 11, 27, 48     | 139, 158, 185, 194               | 48         |
| <b>UBE2D4</b> |             | 185           | 11,48       | 168, 185, 194                   | 11, 48         | 74, 158, 168, 185, 194     | 11, 27, 33, 48 | 138, 139, 168, 185               | 48         |
| <b>UBE2T</b>  |             | 168           | 11,48,27,63 | 168, 185                        | 11, 27, 48     | ND                         | ND             | 185                              | 11         |
