# Supplementary material
Source: PubMed Central journal article supplement (PMC3243545)

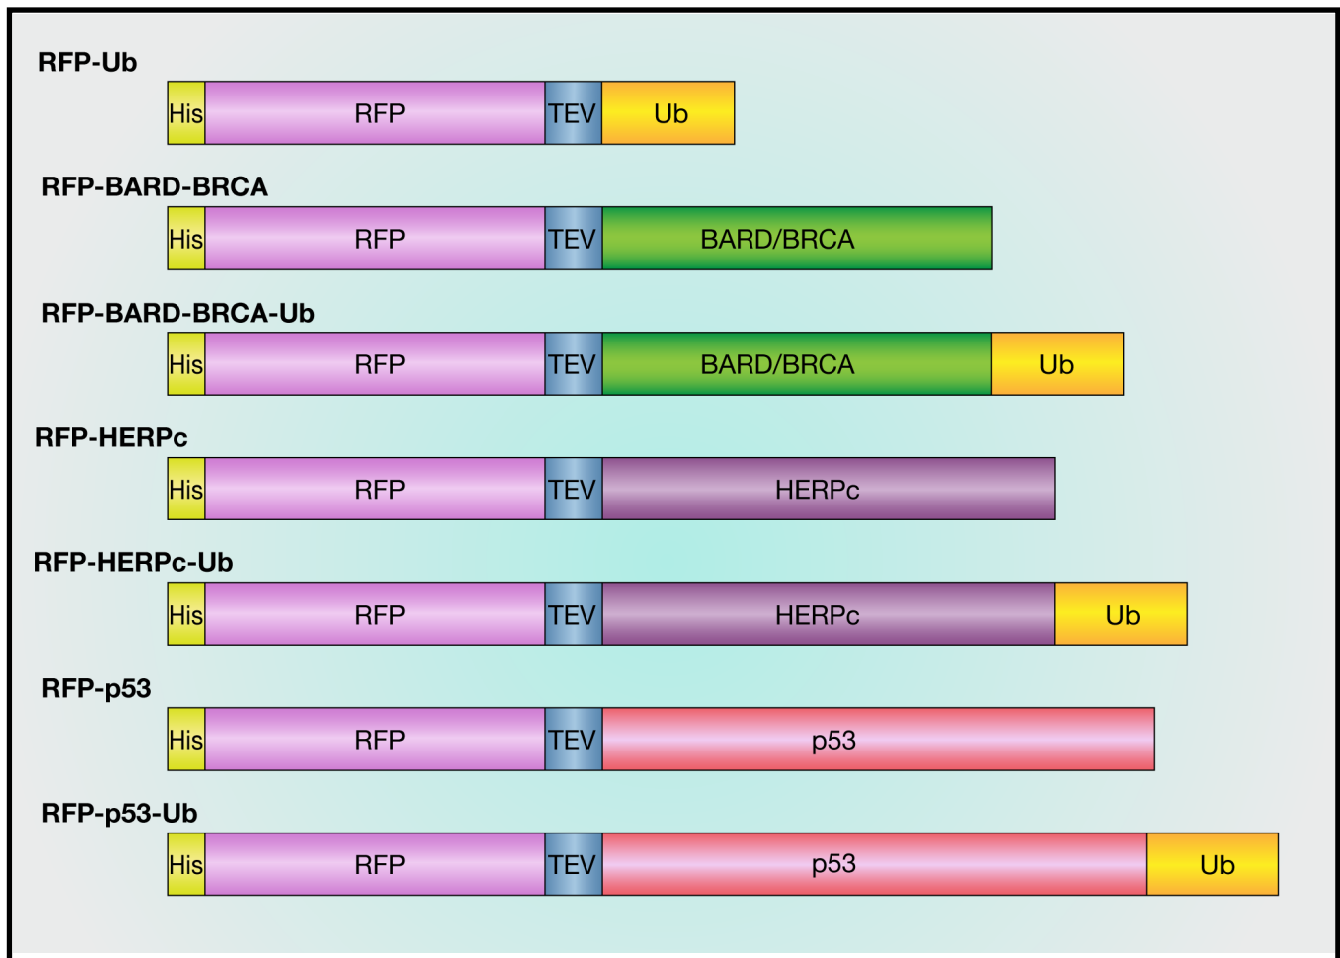

**Figure S1**

Supplement: supp_M111.234559_FigureS1.pdf [file supp_M111.234559_FigureS1.pdf]

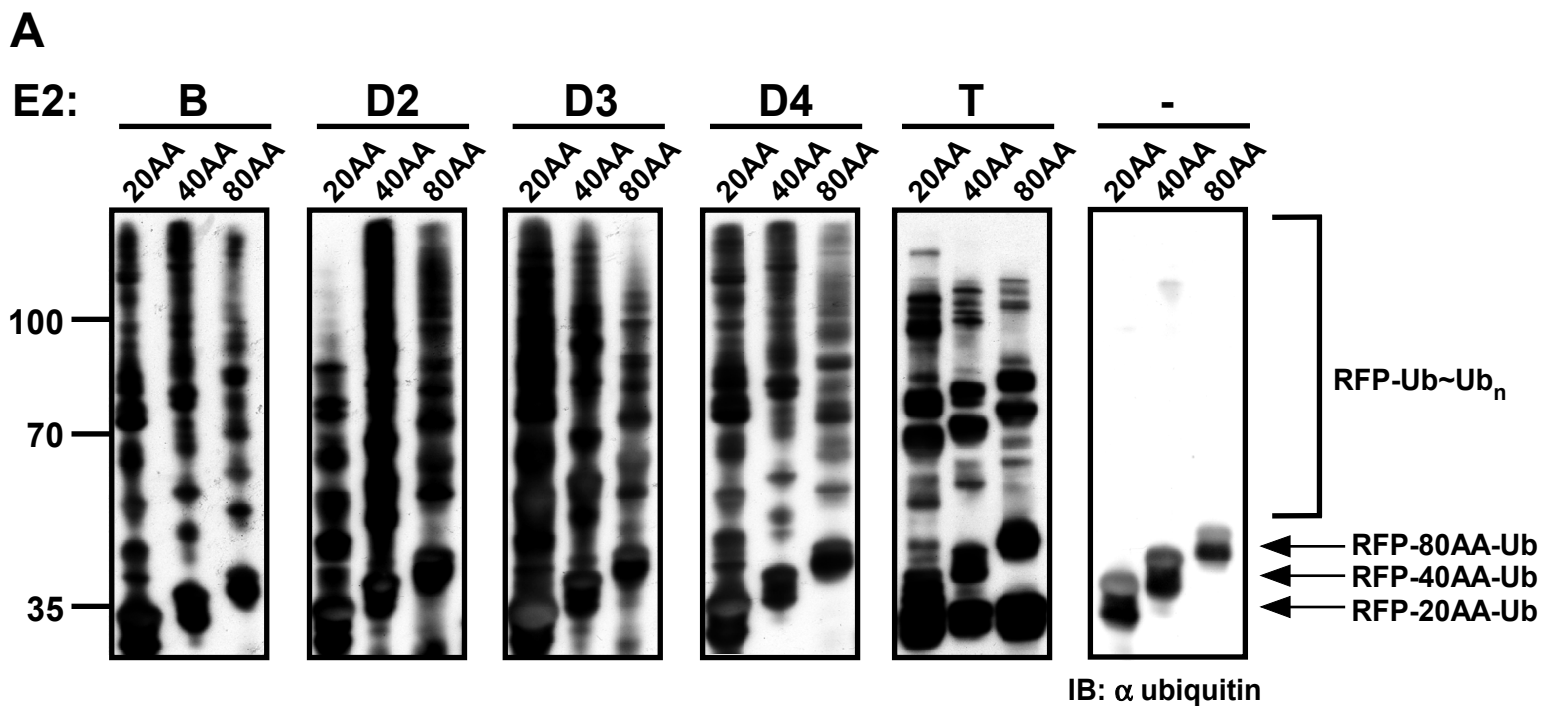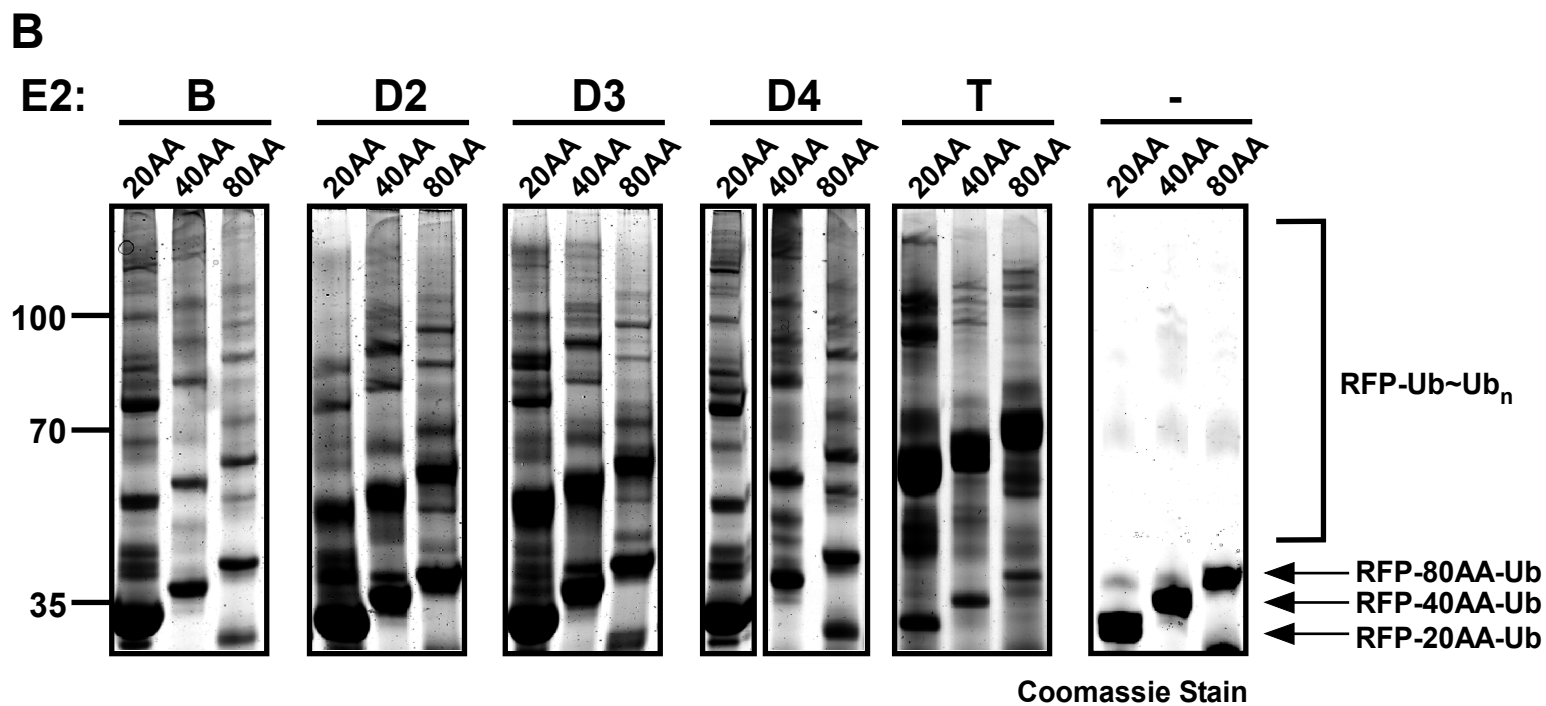

**Figure S2**

Supplement: supp_M111.234559_FigureS2.pdf [file supp_M111.234559_FigureS2.pdf]

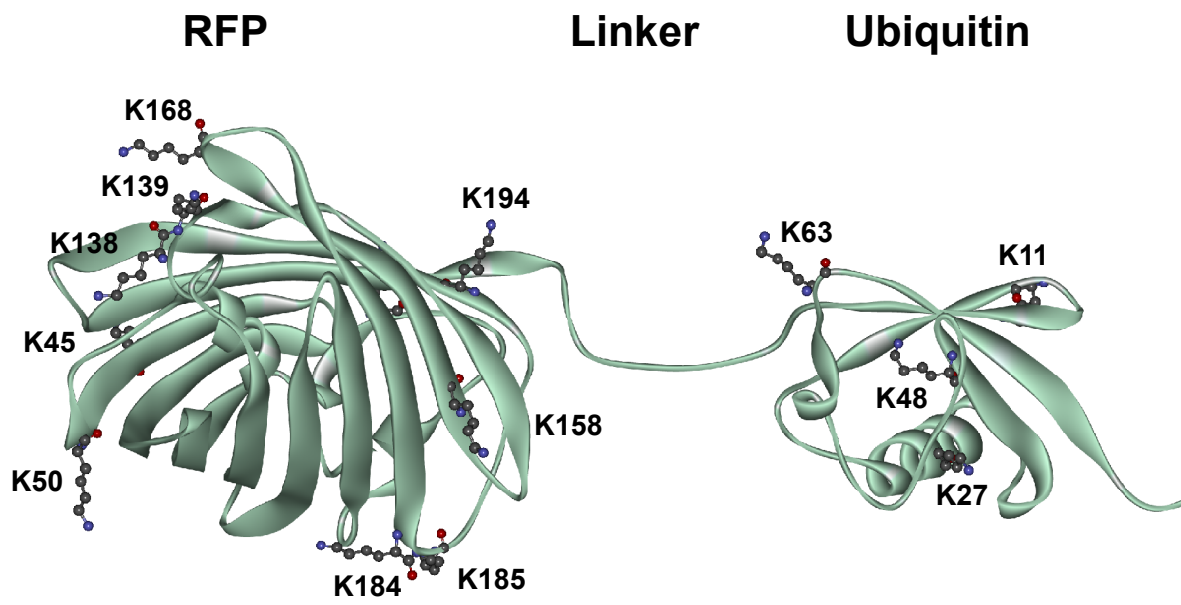

**Figure S3**

Supplement: supp_M111.234559_FigureS3.pdf [file supp_M111.234559_FigureS3.pdf]

A

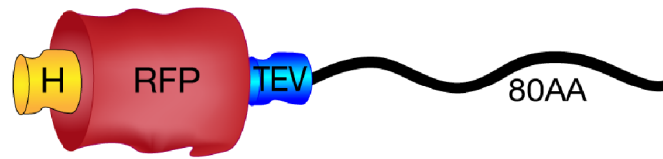

B

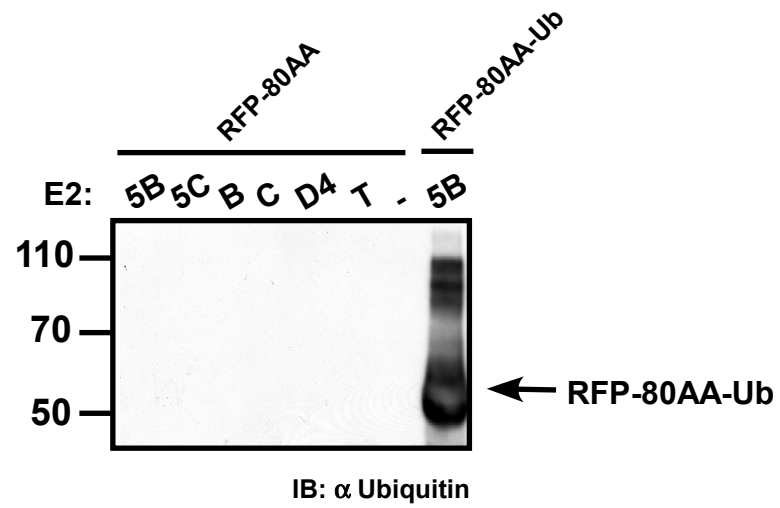

Figure S4

Supplement: supp_M111.234559_FigureS4.pdf [file supp_M111.234559_FigureS4.pdf]

**A**

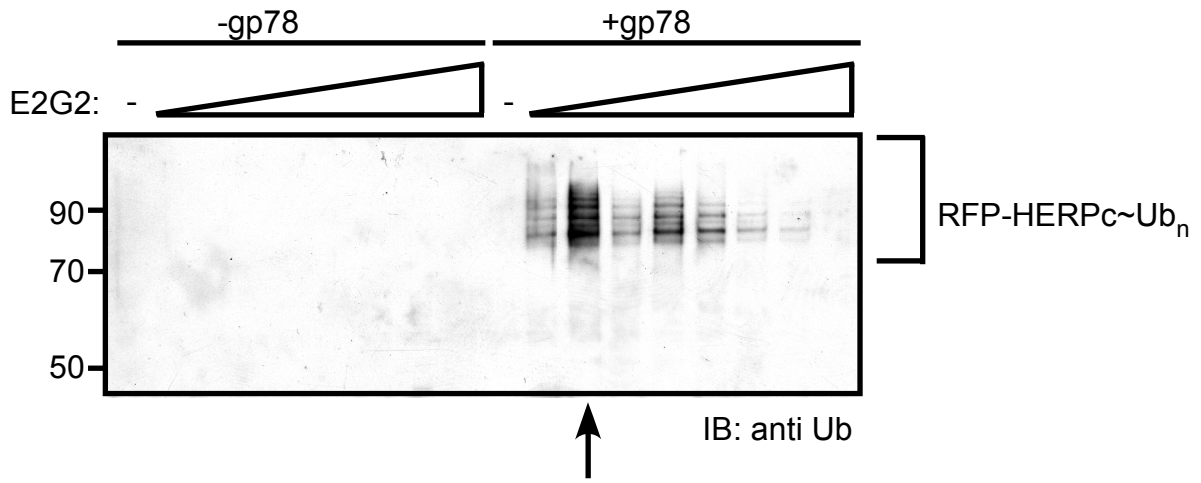

**B**

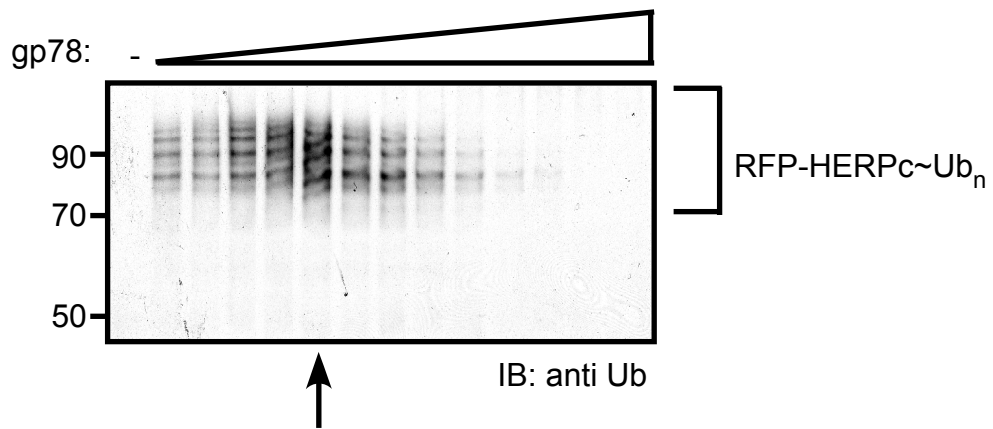

**Figure S5**

Supplement: supp_M111.234559_FigureS5.pdf [file supp_M111.234559_FigureS5.pdf]

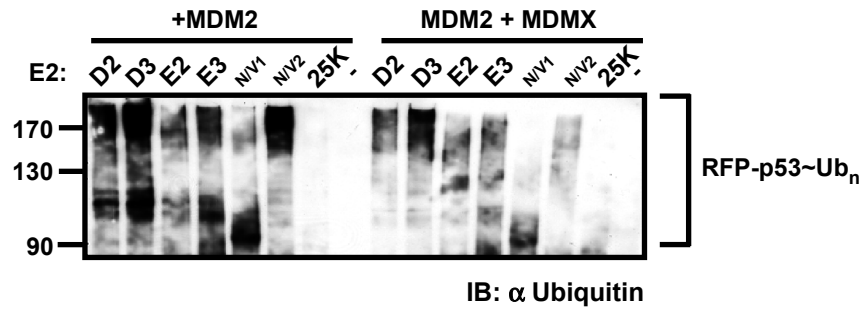

**Figure S9**

Supplement: supp_M111.234559_FigureS9.pdf [file supp_M111.234559_FigureS9.pdf]
